# Supplementary material for: Leveraging the shared and opposing genetic mechanisms in the heritable cardiomyopathies
Source: Research Square preprint supplement (doi:10.21203/rs.3.rs-8346032/v1), 2026-01-27
Supplement: Supplementary file 1 [file d44d2d43e710ee00f3770efc.xlsx]

## Sheet: Table
ST1 Variants before/after QC per GWAS
ST2 Summary of locus discovery & gene prioritization across studies
ST3 Genetic correlations: DCM, HCM & cardiac MRI traits
ST4 Comparison of lead variant effects: DCM vs HCM
ST5 LAVA univariate & bivariate local rg across DCM/HCM loci
ST6 CC lead variant effects vs DCM/HCM GWAS
ST7 Genetic correlations: CC spectrum vs cardiac MRI traits
ST8 Pathway enrichment of prioritized CC genes
ST9 Partitioned heritability of CC loci
ST10 Pathway enrichment of novel CC-prioritized genes
ST11 PheWAS for genes from novel loci
ST12 Validation of top SNPs from CC GWAS/MTAG
ST13 Druggability of all prioritized genes
ST14 PGS performance metrics across DCM, HCM & CC MTAG
ST15 Phenotype definitions for PGS
ST16 PGS replication analyses
ST17 PheWAS for CASQ2
ST18 Validation of top SNP from shared meta-analysis
ST19 rg: DCM, HCM & shared meta vs cardiometabolic traits
ST20 Pairwise rg with other cardiac diseases
ST21 rg across cardiomyopathy GWASs & traits
ST22 Trait PGS in DCM and HCM cohorts
ST23 Expression of prioritized genes in cardiac cell types (snRNA/scRNA)
ST24 Summary of fine-mapping analyses
ST25 SuSiE LD intervals for DCM GWAS
ST26 Gene prioritization scores for DCM GWAS fine-mapped loci
ST27 SuSiE LD intervals for HCM GWAS
ST28 Gene prioritization scores for HCM GWAS fine-mapped loci
ST29 SuSiE LD intervals for DCM MTAG
ST30 Gene prioritization scores for DCM MTAG
ST31 SuSiE LD intervals for HCM MTAG
ST32 Gene prioritization scores for HCM MTAG
ST33 SuSiE LD intervals for CC GWAS
ST34 Gene prioritization scores for CC GWAS
ST35 SuSiE LD intervals for CC MTAG
ST36 Gene prioritization scores for CC MTAG

## Sheet: ST1 Variants beforeafter QC per
N	Dataset name	Original study	Original number of variants	Number of variants after QC	QC steps
1	DCM_GWAS	Jurgens et al., 2024	12600234	6635031	1) EAFREQ >= 0.005 & EAFREQ <= 0.995 2) N_cases >= 0.7 * max(N_cases) 3) excl. CHR == 11 & POS >= 29978453 & POS <= 80288956
2	HCM_GWAS	Tadros et al., 2025	9492702	6035750	1) EAFREQ >= 0.005 & EAFREQ <= 0.995 2) N_cases >= 0.96 * max(N_cases) 3) excl. CHR == 11 & POS >= 30000000 & POS <= 80000000
3	DCM_MTAG	Jurgens et al., 2024	7268396	5513180	1) EAFREQ >= 0.005 & EAFREQ <= 0.995 2) N_Neff >= 0.7 * max(N_Neff) 3) excl. CHR == 11 & POS >= 29978453 & POS <= 80288956
4	HCM_MTAG	Tadros et al., 2025	6849392	5117470	1) EAFREQ >= 0.005 & EAFREQ <= 0.995 2) N_Neff >= 0.96 * max(N_Neff) 3) excl. CHR == 11 & POS >= 30000000 & POS <= 80000000
Note: EAFREQ, effect allele frequency; N_cases, number of cases; N_Neff, effective sample size; CHR, chromosome; POS, genomic position (GRCh37/hg19); excl., excluded; QC, quality control.

## Sheet: ST2 Summary of locus discovery 
Locus number	CHR	Start BP	End BP	GWAS/MTAG in which loci indentified	Candidate genes from all studies	Scoring accross studies	Only prioritized genes accross studies	Genes prioritized by PoPS and FLAMES per study						Cross-study overlap & novelty				Annotation through different methods								Top variants from CC studies
								DCM		HCM		CC		Novel loci identified with CC GWAS?MTAG	Intersection across all GWAS/MTAG studies	Intersection only across GWAS studies	Intersection only across MTAG studies	CC GWAS				CC MTAG				CC GWAS		CC MTAG
								GWAS	MTAG	GWAS	MTAG	GWAS	MTAG					PoPS	FLAMES	XGB	nearestGene	PoPS	FLAMES	XGB	nearestGene	rsID	SNP	rsID	SNP
1	1	2147146	2156362	HCM_MTAG,CC_GWAS,CC_MTAG	SKI	SKI = 3	SKI				SKI	SKI	SKI		CC & HCM	CC	HCM & CC	SKI	SKI	SKI	SKI	SKI	SKI	SKI	SKI	rs2460000	chr1:2156362_G_A	rs2460000	chr1:2156362_G_A
2	1	3199217	3199217	CC_GWAS,CC_MTAG	PRDM16	PRDM16 = 2	PRDM16					PRDM16*	PRDM16*	CC unique	CC unique	CC	CC	PRDM16	PRDM16	PRDM16	PRDM16	PRDM16	PRDM16	PRDM16	PRDM16	rs16823802	chr1:3199217_T_C	rs16823802	chr1:3199217_T_C
3	1	6263792	6278414	DCM_MTAG,CC_MTAG,HCM_MTAG,CC_GWAS	RNF207, RPL22	RNF207 = 2, RPL22 = 2	RNF207/RPL22		RNF207/RPL22		RNF207/RPL22	RPL22/RNF207	RNF207/RPL22		DCM & HCM & CC	CC	DCM & HCM & CC	RPL22	RNF207	RNF207	RNF207	RNF207	RPL22	RPL22	RPL22	rs709209	chr1:6278414_G_A	rs11121483	chr1:6263792_G_A
4	1	16338925	16365210	DCM_GWAS,CC_GWAS,CC_MTAG,DCM_MTAG,HCM_GWAS,HCM_MTAG	HSPB7, EPHA2, ZBTB17, CLCNKB	HSPB7 = 4.5, EPHA2 = 1.5, ZBTB17 = 0.5, CLCNKB = 0.5	HSPB7	HSPB7	EPHA2/HSPB7, EPHA2/CLCNKB	ZBTB17/HSPB7	HSPB7	EPHA2/HSPB7	HSPB7		DCM & HCM & CC	DCM & HCM & CC	DCM & HCM & CC	EPHA2	HSPB7	HSPB7	HSPB7	HSPB7	HSPB7	HSPB7	HSPB7	rs1763605	chr1:16338925_G_T	rs1763605	chr1:16338925_G_T
5	1	22248881	22248881	CC_MTAG	HSPG2	HSPG2 = 1	HSPG2						HSPG2	CC unique	CC unique		CC					HSPG2	HSPG2	USP48	HSPG2			rs10799719	chr1:22248881_A_G
6	1	45954033	47174328	DCM_GWAS,DCM_MTAG,CC_MTAG,CC_GWAS	MAST2, TESK2, AKR1A1, PIK3R3, EFCAB14	MAST2 = 2.5, TESK2 = 0.5, AKR1A1 = 1, PIK3R3 = 0.5, EFCAB14 = 0.5	MAST2	MAST2/TESK2	MAST2/AKR1A1			MAST2/PIK3R3	MAST2/AKR1A1, MAST2/EFCAB14		CC & DCM	DCM & CC	DCM & CC	MAST2	PIK3R3	PIK3R3	PIK3R3	MAST2	AKR1A1, EFCAB14	AKR1A1, MOB3C	AKR1A1	rs1707334	chr1:46605728_C_A	rs518365	chr1:46010652_G_A
7	1	50840676	51793258	DCM_GWAS,DCM_MTAG	CDKN2C, FAF1	CDKN2C = 2.5, FAF1 = 0.5	CDKN2C	CDKN2C/FAF1	CDKN2C						Only DCM	DCM	DCM
8	1	61881191	61886891	CC_GWAS,DCM_GWAS	NFIA	NFIA = 2	NFIA	NFIA				NFIA			CC & DCM	DCM & CC		NFIA	NFIA	NFIA	NFIA					rs2261792	chr1:61881191_A_G
9	1	78504264	78559044	CC_MTAG,HCM_MTAG,CC_GWAS	NEXN, GIPC2	NEXN = 1.5, GIPC2 = 1.5	NEXN/GIPC2				GIPC2	NEXN/GIPC2	NEXN		CC & HCM	CC	HCM & CC	NEXN	GIPC2	DNAJB4	GIPC2	NEXN	NEXN	GIPC2	GIPC2	rs587143	chr1:78559044_C_T	rs6699769	chr1:78504264_G_A
10	1	89332165	89332165	CC_MTAG,HCM_MTAG	RBMXL1, GTF2B, PKN2	RBMXL1 = 0.5, GTF2B = 1, PKN2 = 0.5	RBMXL1/GTF2B/PKN2				GTF2B		RBMXL1/PKN2		CC & HCM		HCM & CC					RBMXL1	PKN2	PKN2	GTF2B			rs2810883	chr1:89332165_T_C
11	1	162023184	162023184	CC_GWAS	NOS1AP	NOS1AP = 1	NOS1AP					NOS1AP		CC unique	CC unique	CC		NOS1AP	NOS1AP	NOS1AP	NOS1AP					rs60129000	chr1:162023184_C_T
12	1	212107306	212277107	DCM_MTAG,CC_MTAG	DTL, BATF3	DTL = 1.5, BATF3 = 0.5	DTL		DTL				BATF3/DTL		CC & DCM		DCM & CC					BATF3	DTL	DTL	DTL			rs1387815	chr1:212277107_G_T
13	1	214167058	214460854	CC_MTAG,DCM_MTAG,CC_GWAS,HCM_MTAG	PROX1, SMYD2	PROX1 = 5.5, SMYD2 = 0.5	PROX1		PROX1		PROX1, PROX1/SMYD2	PROX1	PROX1		DCM & HCM & CC	CC	DCM & HCM & CC	PROX1	PROX1	PROX1	PROX1	PROX1	PROX1	PROX1	PROX1	rs74139612	chr1:214285155_C_T	rs74139614	chr1:214285221_T_C
14	1	228494790	228520382	CC_GWAS,CC_MTAG,DCM_MTAG	OBSCN	OBSCN = 3	OBSCN		OBSCN			OBSCN	OBSCN		CC & DCM	CC	DCM & CC	OBSCN	OBSCN	OBSCN	OBSCN	OBSCN	OBSCN	OBSCN	OBSCN	rs435776	chr1:228494790_A_G	rs435776	chr1:228494790_A_G
15	1	236801085	236853167	CC_MTAG,HCM_MTAG,DCM_GWAS,DCM_MTAG,CC_GWAS	ACTN2	ACTN2 = 5	ACTN2	ACTN2	ACTN2		ACTN2	ACTN2	ACTN2		DCM & HCM & CC	DCM & CC	DCM & HCM & CC	ACTN2	ACTN2	ACTN2	ACTN2	ACTN2	ACTN2	ACTN2	HEATR1	rs4659701	chr1:236853167_A_G	rs547048	chr1:236801085_C_T
16	2	11584197	11592294	HCM_GWAS,HCM_MTAG,CC_GWAS,CC_MTAG	LPIN1, E2F6	LPIN1 = 2, E2F6 = 2	LPIN1/E2F6			LPIN1/E2F6	LPIN1/E2F6	LPIN1/E2F6	LPIN1/E2F6		CC & HCM	HCM & CC	HCM & CC	LPIN1	E2F6	E2F6	E2F6	LPIN1	E2F6	E2F6	E2F6	rs6751915	chr2:11592294_T_G	rs6751915	chr2:11592294_T_G
17	2	36656471	37232330	DCM_MTAG,DCM_GWAS,CC_MTAG,CC_GWAS,HCM_GWAS,HCM_MTAG	CRIM1, STRN	CRIM1 = 5, STRN = 6	STRN	CRIM1, CRIM1/STRN	CRIM1, CRIM1/STRN	STRN	STRN	STRN	CRIM1, CRIM1/STRN		DCM & HCM & CC	DCM & HCM & CC	DCM & HCM & CC	STRN	STRN	STRN	STRN	CRIM1	CRIM1, STRN	CRIM1, STRN	STRN	rs2540926	chr2:37090897_A_G	rs10193295	chr2:37169049_A_G
18	2	65276452	65280185	HCM_MTAG,CC_MTAG	SLC1A4, ACTR2, CEP68	SLC1A4 = 0.5, ACTR2 = 1, CEP68 = 0.5	SLC1A4/ACTR2/CEP68				SLC1A4/CEP68		ACTR2		CC & HCM		HCM & CC					ACTR2	ACTR2	CEP68	CEP68			rs2723063	chr2:65280185_G_A
19	2	71627539	71695111	DCM_MTAG,CC_MTAG	DYSF, CYP26B1, ZNF638	DYSF = 1, CYP26B1 = 0.5, ZNF638 = 0.5	DYSF/CYP26B1/ZNF638		DYSF/ZNF638				CYP26B1/DYSF		CC & DCM		DCM & CC					CYP26B1	DYSF	DYSF	DYSF			rs6738477	chr2:71695111_T_G
20	2	103426177	103728170	DCM_GWAS,DCM_MTAG,HCM_GWAS,CC_GWAS,CC_MTAG,HCM_MTAG	IL1R1, SLC9A2, TMEM182, IL18R1	IL1R1 = 1, SLC9A2 = 0.5, TMEM182 = 6, IL18R1 = 0.5	TMEM182	IL1R1/TMEM182	SLC9A2/TMEM182	TMEM182	TMEM182	TMEM182	IL1R1/TMEM182, IL18R1/TMEM182		DCM & HCM & CC	DCM & HCM & CC	DCM & HCM & CC	TMEM182	TMEM182	TMEM182	TMEM182	IL1R1, IL18R1	TMEM182	TMEM182	TMEM182	rs2540277	chr2:103426177_T_C	rs2540277	chr2:103426177_T_C
21	2	159973446	159980395	DCM_GWAS,DCM_MTAG	TANC1	TANC1 = 2	TANC1	TANC1	TANC1						Only DCM	DCM	DCM
22	2	174888351	174888351	CC_MTAG	SP3	SP3 = 1	SP3						SP3	CC unique	CC unique		CC					SP3	SP3	SP3	OLA1			rs35717017	chr2:174888351_T_G
23	2	179421294	179862396	DCM_GWAS,DCM_MTAG,CC_MTAG,CC_GWAS,HCM_MTAG,HCM_GWAS	TTN, CCDC141	TTN = 6.5, CCDC141 = 4.5	TTN	TTN	TTN, TTN/CCDC141	CCDC141	TTN/CCDC141	TTN/CCDC141	TTN, TTN/CCDC141		DCM & HCM & CC	DCM & HCM & CC	DCM & HCM & CC	TTN	CCDC141	CCDC141	CCDC141	TTN	TTN, CCDC141	TTN, CCDC141	TTN	rs6747402	chr2:179759434_A_G	rs12988307	chr2:179490478_C_T
24	2	200885973	201229473	DCM_MTAG,DCM_GWAS,CC_MTAG,HCM_MTAG,CC_GWAS	SPATS2L	SPATS2L = 6	SPATS2L	SPATS2L	SPATS2L		SPATS2L	SPATS2L	SPATS2L		DCM & HCM & CC	DCM & CC	DCM & HCM & CC	SPATS2L	SPATS2L	SPATS2L	SPATS2L	SPATS2L	SPATS2L	SPATS2L	SPATS2L	rs295129	chr2:201229473_A_G	rs7605146	chr2:201183888_A_G
25	2	213205001	213205047	DCM_GWAS,DCM_MTAG,CC_MTAG	ERBB4	ERBB4 = 3	ERBB4	ERBB4	ERBB4				ERBB4		CC & DCM	DCM	DCM & CC					ERBB4	ERBB4	ERBB4	ERBB4			rs4673661	chr2:213205047_G_A
26	2	220406088	220406088	HCM_GWAS	DES, CHPF	DES = 0.5, CHPF = 0.5	DES/CHPF			DES/CHPF					Only HCM	HCM
27	3	12626516	12842223	DCM_MTAG,CC_GWAS,CC_MTAG,DCM_GWAS,HCM_MTAG	PPARG, RAF1, CAND2	PPARG = 2.5, RAF1 = 3.5, CAND2 = 2	RAF1	PPARG/CAND2	PPARG/RAF1, PPARG/CAND2		RAF1*	RAF1, RAF1/CAND2	PPARG/RAF1, PPARG/CAND2		DCM & HCM & CC	DCM & CC	DCM & HCM & CC	RAF1	RAF1, CAND2	RAF1, CAND2	CAND2	PPARG	RAF1, CAND2	RAF1, CAND2	CAND2	rs4642101	chr3:12842223_G_T	rs4642101	chr3:12842223_G_T
28	3	14274451	14628058	DCM_GWAS,DCM_MTAG,CC_GWAS,CC_MTAG,HCM_MTAG,HCM_GWAS	SLC6A6, XPC, WNT7A, FBLN2, LSM3, CCDC174	SLC6A6 = 4.5, XPC = 3, WNT7A = 1, FBLN2 = 0.5, LSM3 = 3.5, CCDC174 = 0.5	SLC6A6	SLC6A6, SLC6A6/XPC	XPC/LSM3, XPC/SLC6A6, XPC/CCDC174	FBLN2/LSM3	SLC6A6/LSM3	WNT7A/XPC, WNT7A/LSM3	SLC6A6, SLC6A6/LSM3		DCM & HCM & CC	DCM & HCM & CC	DCM & HCM & CC	WNT7A	XPC, LSM3	LSM3	LSM3	SLC6A6	SLC6A6, LSM3	LSM3	LSM3	rs17226476	chr3:14276982_A_G	rs17226476	chr3:14276982_A_G
29	3	20003611	20003611	CC_MTAG	KAT2B	KAT2B = 1	KAT2B						KAT2B	CC unique	CC unique		CC					KAT2B	KAT2B	RAB5A	RAB5A			rs4241539	chr3:20003611_G_T
30	3	49890967	50306249	CC_MTAG	CACNA2D2, APEH	CACNA2D2 = 1.5, APEH = 0.5	CACNA2D2						CACNA2D2/APEH, CACNA2D2	CC unique	CC unique		CC					CACNA2D2	APEH, CACNA2D2	APEH, HYAL1	GNAI2			rs3806708	chr3:50306249_C_T
31	3	52359678	53981291	HCM_MTAG,DCM_MTAG,CC_MTAG,CC_GWAS,DCM_GWAS	SEMA3G, PRKCD, TKT, TNNC1, CACNA1D, ITIH3, ITIH4, CHDH, SELK, CACNA2D3	SEMA3G = 1, PRKCD = 1, TKT = 5, TNNC1 = 0.5, CACNA1D = 2, ITIH3 = 1, ITIH4 = 0.5, CHDH = 0.5, SELK = 1, CACNA2D3 = 0.5	TKT	TKT	PRKCD/ITIH3, PRKCD/TKT		SEMA3G, CACNA1D/CHDH, CACNA1D/SELK	TNNC1/ITIH4, CACNA1D/TKT, CACNA1D/SELK	TKT/ITIH3, TKT, TKT/CACNA2D3		DCM & HCM & CC	DCM & CC	DCM & HCM & CC	TNNC1, CACNA1D	ITIH4, TKT, SELK	TMEM110-MUSTN1, TKT, SELK	TKT	TKT	ITIH3, TKT, CACNA2D3	ITIH3, SFMBT1, TKT, SELK	RFT1	rs62256002	chr3:53282990_C_T	rs2564923	chr3:53103262_G_A
32	3	69807905	69862105	CC_GWAS,HCM_MTAG,CC_MTAG,DCM_MTAG	MITF	MITF = 4	MITF		MITF		MITF	MITF	MITF		DCM & HCM & CC	CC	DCM & HCM & CC	MITF	MITF	MITF	MITF	MITF	MITF	MITF	MITF	rs4855323	chr3:69807905_T_G	rs56099248	chr3:69857773_T_C
33	3	106995323	107024789	CC_MTAG,DCM_GWAS	BBX, CCDC54	BBX = 1.5, CCDC54 = 0.5	BBX	BBX/CCDC54					BBX		CC & DCM	DCM	CC					BBX	BBX	BBX	CCDC54			rs9790188	chr3:106995323_T_G
34	3	158311547	158311547	DCM_GWAS,DCM_MTAG,CC_GWAS,CC_MTAG	MLF1	MLF1 = 4	MLF1	MLF1	MLF1			MLF1	MLF1		CC & DCM	DCM & CC	DCM & CC	MLF1	MLF1	MLF1	MLF1	MLF1	MLF1	MLF1	MLF1	rs1836688	chr3:158311547_G_A	rs1836688	chr3:158311547_G_A
35	3	169177924	169177924	CC_MTAG	SEC62, MECOM	SEC62 = 0.5, MECOM = 0.5	SEC62/MECOM						SEC62/MECOM	CC unique	CC unique		CC					SEC62	MECOM	MECOM	MECOM			rs9850919	chr3:169177924_T_C
36	3	171800256	171800256	HCM_GWAS,CC_GWAS,CC_MTAG,HCM_MTAG	FNDC3B	FNDC3B = 4	FNDC3B			FNDC3B	FNDC3B	FNDC3B	FNDC3B		CC & HCM	HCM & CC	HCM & CC	FNDC3B	FNDC3B	FNDC3B	FNDC3B	FNDC3B	FNDC3B	FNDC3B	FNDC3B	rs4894803	chr3:171800256_G_A	rs4894803	chr3:171800256_G_A
37	3	186083611	186083611	DCM_MTAG,CC_MTAG	KNG1, HRG, DGKG	KNG1 = 0.5, HRG = 0.5, DGKG = 1	KNG1/HRG/DGKG		KNG1/DGKG				HRG/DGKG		CC & DCM		DCM & CC					HRG	DGKG	DGKG	DGKG			rs7618021	chr3:186083611_T_C
38	4	16032948	16035795	HCM_MTAG,DCM_MTAG,CC_GWAS,CC_MTAG	PROM1	PROM1 = 4	PROM1		PROM1		PROM1	PROM1	PROM1		DCM & HCM & CC	CC	DCM & HCM & CC	PROM1	PROM1	PROM1	PROM1	PROM1	PROM1	PROM1	PROM1	rs13133886	chr4:16035795_C_A	rs13133886	chr4:16035795_C_A
39	4	68556786	68556786	CC_GWAS	GNRHR, UBA6	GNRHR = 0.5, UBA6 = 0.5	GNRHR/UBA6					GNRHR/UBA6		CC unique	CC unique	CC		GNRHR	UBA6	UBA6	UBA6					rs9998837	chr4:68556786_G_A
40	4	95453350	95495908	DCM_MTAG,CC_GWAS,CC_MTAG	PDLIM5	PDLIM5 = 4	PDLIM5		PDLIM5			PDLIM5	PDLIM5		CC & DCM	CC	DCM & CC	PDLIM5	PDLIM5	PDLIM5	PDLIM5	PDLIM5	PDLIM5	PDLIM5	PDLIM5	rs2452581	chr4:95463956_T_G	rs2452581	chr4:95463956_T_G
41	4	103778056	103848416	DCM_MTAG,CC_MTAG	UBE2D3, CISD2	UBE2D3 = 1.5, CISD2 = 0.5	UBE2D3		UBE2D3/CISD2				UBE2D3		CC & DCM		DCM & CC					UBE2D3	UBE2D3	SLC9B1	SLC9B1			rs77939343	chr4:103848416_T_C
42	4	111704143	111718067	DCM_GWAS,DCM_MTAG	PITX2, ENPEP	PITX2 = 1.5, ENPEP = 0.5	PITX2	PITX2	ENPEP/PITX2						Only DCM	DCM	DCM
43	4	114444394	114471575	DCM_GWAS,CC_MTAG	CAMK2D	CAMK2D = 2	CAMK2D	CAMK2D					CAMK2D		CC & DCM	DCM	CC					CAMK2D	CAMK2D	CAMK2D	CAMK2D			rs34402195	chr4:114471575_T_C
44	5	36624602	36630209	CC_GWAS,CC_MTAG,HCM_MTAG	SLC1A3, NIPBL	SLC1A3 = 3.5, NIPBL = 0.5	SLC1A3				SLC1A3	SLC1A3	NIPBL/SLC1A3		CC & HCM	CC	HCM & CC	SLC1A3	SLC1A3	SLC1A3	SLC1A3	NIPBL	SLC1A3	SLC1A3	SLC1A3	rs11954014	chr5:36624602_C_T	rs75096272	chr5:36630209_A_G
45	5	56976098	57011404	DCM_GWAS,DCM_MTAG,HCM_GWAS,CC_GWAS,CC_MTAG,HCM_MTAG	MIER3, PLK2, ACTBL2, GPBP1	MIER3 = 1.5, PLK2 = 3, ACTBL2 = 1, GPBP1 = 0.5	PLK2	MIER3/ACTBL2	MIER3/GPBP1	PLK2	PLK2	PLK2	MIER3/ACTBL2		DCM & HCM & CC	DCM & HCM & CC	DCM & HCM & CC	PLK2	PLK2	PLK2	ACTBL2	MIER3	ACTBL2	ACTBL2	ACTBL2	rs2191446	chr5:57011404_A_G	rs2191446	chr5:57011404_A_G
46	5	138668504	138762305	HCM_GWAS,CC_GWAS,DCM_GWAS,HCM_MTAG,DCM_MTAG,CC_MTAG	UBE2D2, TMEM173, DNAJC18, PROB1, PAIP2	UBE2D2 = 1.5, TMEM173 = 1.5, DNAJC18 = 1.5, PROB1 = 1, PAIP2 = 0.5	UBE2D2/TMEM173/DNAJC18/PROB1	TMEM173	DNAJC18	UBE2D2/PROB1	UBE2D2/DNAJC18	UBE2D2/PAIP2	TMEM173/PROB1		DCM & HCM & CC	DCM & HCM & CC	DCM & HCM & CC	UBE2D2	PAIP2	PAIP2	SLC23A1	TMEM173	PROB1	DNAJC18	DNAJC18	rs6596471	chr5:138705588_G_A	rs11242465	chr5:138762305_G_T
47	5	143520377	143520377	DCM_MTAG	NR3C1	NR3C1 = 1	NR3C1		NR3C1						Only DCM		DCM
48	6	16281187	17278707	CC_MTAG,HCM_MTAG	ATXN1, GMPR, RBM24	ATXN1 = 1, GMPR = 1.5, RBM24 = 0.5	ATXN1/GMPR				GMPR		ATXN1/GMPR, ATXN1/RBM24		CC & HCM		HCM & CC					ATXN1	GMPR, RBM24	GMPR, RBM24	GMPR			rs6914805	chr6:16281187_T_C
49	6	36633069	36647289	DCM_GWAS,DCM_MTAG,HCM_GWAS,CC_GWAS,CC_MTAG,HCM_MTAG	PIM1, CPNE5, PXT1, CDKN1A	PIM1 = 1, CPNE5 = 1.5, PXT1 = 0.5, CDKN1A = 3	CDKN1A	PIM1/CDKN1A	CPNE5/CDKN1A	PXT1/CDKN1A	CPNE5/CDKN1A	CPNE5/CDKN1A	PIM1/CDKN1A		DCM & HCM & CC	DCM & HCM & CC	DCM & HCM & CC	CPNE5	CDKN1A	CDKN1A	CDKN1A	PIM1	CDKN1A	CDKN1A	CDKN1A	rs3176326	chr6:36647289_A_G	rs3176326	chr6:36647289_A_G
50	6	53957588	53999025	DCM_GWAS,DCM_MTAG,CC_GWAS,CC_MTAG,HCM_MTAG	MLIP	MLIP = 5	MLIP	MLIP	MLIP		MLIP	MLIP	MLIP		DCM & HCM & CC	DCM & CC	DCM & HCM & CC	MLIP	MLIP	MLIP	MLIP	MLIP	MLIP	MLIP	MLIP	rs625899	chr6:53957588_C_T	rs684940	chr6:53961513_T_G
51	6	91212135	91212135	DCM_MTAG,CC_MTAG	MAP3K7	MAP3K7 = 2	MAP3K7		MAP3K7				MAP3K7		CC & DCM		DCM & CC					MAP3K7	MAP3K7	MAP3K7	MAP3K7			rs205653	chr6:91212135_A_C
52	6	118653075	119018319	HCM_GWAS,CC_GWAS,CC_MTAG,HCM_MTAG,DCM_MTAG,DCM_GWAS	PLN, SLC35F1, CEP85L	PLN = 11.5, SLC35F1 = 2, CEP85L = 4.5	PLN	PLN/CEP85L	PLN, PLN/CEP85L	PLN/SLC35F1, PLN, PLN/CEP85L	PLN/SLC35F1, PLN, PLN/CEP85L	PLN/SLC35F1, PLN, PLN/CEP85L	PLN/SLC35F1, PLN, PLN/CEP85L		DCM & HCM & CC	DCM & HCM & CC	DCM & HCM & CC	PLN	SLC35F1, PLN, CEP85L	SLC35F1, CEP85L	CEP85L	PLN	SLC35F1, PLN, CEP85L	SLC35F1, CEP85L	SLC35F1	rs11756438	chr6:118993632_A_C	rs12210733	chr6:118653075_A_G
53	6	123818871	123818871	HCM_GWAS	TRDN	TRDN = 1	TRDN			TRDN					Only HCM	HCM
54	6	126090277	126090277	HCM_MTAG	HEY2	HEY2 = 1	HEY2				HEY2				Only HCM		HCM
55	6	150156204	150164378	CC_MTAG,HCM_MTAG	LATS1	LATS1 = 2	LATS1				LATS1		LATS1		CC & HCM		HCM & CC					LATS1	LATS1	NUP43	LRP11			rs2342764	chr6:150156204_A_G
56	7	46630354	46630354	DCM_MTAG	TNS3, AC011294.3	TNS3 = 0.5, AC011294.3 = 0.5	TNS3/AC011294.3		TNS3/AC011294.3						Only DCM		DCM
57	7	107633517	107633517	DCM_MTAG,CC_MTAG	LAMB1	LAMB1 = 2	LAMB1		LAMB1				LAMB1		CC & DCM		DCM & CC					LAMB1	LAMB1	LAMB1	LAMB1			rs12705437	chr7:107633517_C_T
58	7	128438284	128458649	HCM_GWAS,HCM_MTAG,CC_GWAS,DCM_GWAS,CC_MTAG,DCM_MTAG	FLNC	FLNC = 6	FLNC	FLNC	FLNC	FLNC	FLNC	FLNC	FLNC		DCM & HCM & CC	DCM & HCM & CC	DCM & HCM & CC	FLNC	FLNC	FLNC	CCDC136	FLNC	FLNC	FLNC	CCDC136	rs1565630	chr7:128445266_C_T	rs2307036	chr7:128454537_A_C
59	8	8168394	9036108	HCM_MTAG,CC_MTAG	MFHAS1, PPP1R3B, SGK223	MFHAS1 = 0.5, PPP1R3B = 1, SGK223 = 0.5	MFHAS1/PPP1R3B/SGK223				MFHAS1/SGK223		PPP1R3B		CC & HCM		HCM & CC					PPP1R3B	PPP1R3B	RP11-10A14.4	PPP1R3B			rs62494425	chr8:9036108_G_A
60	8	10186135	11799148	CC_MTAG,HCM_MTAG,DCM_MTAG	SOX7, GATA4, MSRA, MTMR9, CTSB	SOX7 = 1, GATA4 = 2.5, MSRA = 0.5, MTMR9 = 0.5, CTSB = 0.5	GATA4		GATA4		GATA4		SOX7/MSRA, SOX7/MTMR9, GATA4/CTSB		DCM & HCM & CC		DCM & HCM & CC					SOX7, GATA4	MSRA, MTMR9, CTSB	MSRA, MTMR9, DEFB136	DEFB136			rs10903345	chr8:11799148_G_A
61	8	21799245	21802432	CC_GWAS,CC_MTAG,HCM_GWAS,HCM_MTAG	PPP3CC, SORBS3, FGF17, XPO7	PPP3CC = 0.5, SORBS3 = 1, FGF17 = 0.5, XPO7 = 2	XPO7			FGF17/XPO7	SORBS3/XPO7	PPP3CC/XPO7	SORBS3/XPO7		CC & HCM	HCM & CC	HCM & CC	PPP3CC	XPO7	XPO7	XPO7	SORBS3	XPO7	XPO7	XPO7	rs28640935	chr8:21799245_A_G	rs28640935	chr8:21799245_A_G
62	8	95240271	95247830	CC_MTAG,DCM_MTAG	PDP1, GEM	PDP1 = 0.5, GEM = 1.5	GEM		GEM				PDP1/GEM		CC & DCM		DCM & CC					PDP1	GEM	GEM	CDH17			rs2446856	chr8:95240271_G_T
63	8	124552303	124552303	DCM_MTAG,CC_GWAS,CC_MTAG,HCM_MTAG	FBXO32	FBXO32 = 4	FBXO32		FBXO32		FBXO32	FBXO32	FBXO32		DCM & HCM & CC	CC	DCM & HCM & CC	FBXO32	FBXO32	FBXO32	FBXO32	FBXO32	FBXO32	FBXO32	FBXO32	rs7835298	chr8:124552303_A_G	rs7835298	chr8:124552303_A_G
64	8	125859817	125861374	HCM_MTAG,DCM_GWAS,DCM_MTAG,HCM_GWAS,CC_GWAS,CC_MTAG	MTSS1, NSMCE2	MTSS1 = 5.5, NSMCE2 = 0.5	MTSS1	MTSS1	MTSS1	MTSS1	MTSS1	NSMCE2/MTSS1	MTSS1		DCM & HCM & CC	DCM & HCM & CC	DCM & HCM & CC	NSMCE2	MTSS1	MTSS1	MTSS1	MTSS1	MTSS1	MTSS1	MTSS1	rs7461129	chr8:125861374_T_C	rs7461129	chr8:125861374_T_C
65	8	141740868	141740868	CC_MTAG	PTP4A3, PTK2	PTP4A3 = 0.5, PTK2 = 0.5	PTP4A3/PTK2						PTP4A3/PTK2	CC unique	CC unique		CC					PTP4A3	PTK2	PTK2	PTK2			rs6994744	chr8:141740868_C_A
66	9	111865232	111865232	CC_GWAS	TMEM245	TMEM245 = 1	TMEM245					TMEM245		CC unique	CC unique	CC		TMEM245	TMEM245	TMEM245	TMEM245					rs7028081	chr9:111865232_A_C
67	9	134544226	134544226	HCM_MTAG	RAPGEF1	RAPGEF1 = 1	RAPGEF1				RAPGEF1				Only HCM		HCM
68	10	3819714	4351582	CC_GWAS,CC_MTAG,HCM_GWAS,HCM_MTAG	KLF6	KLF6 = 7	KLF6			KLF6	KLF6	KLF6	KLF6		CC & HCM	HCM & CC	HCM & CC	KLF6	KLF6	KLF6	KLF6	KLF6	KLF6	KLF6	KLF6	rs2935284	chr10:4101955_G_A	rs56009417	chr10:4087748_A_G
69	10	29697239	29790036	CC_GWAS,HCM_MTAG,DCM_MTAG,CC_MTAG	SVIL	SVIL = 7	SVIL		SVIL		SVIL	SVIL	SVIL		DCM & HCM & CC	CC	DCM & HCM & CC	SVIL	SVIL	SVIL	SVIL	SVIL	SVIL	SVIL	SVIL	rs2887242	chr10:29697239_G_A	rs4749423	chr10:29717839_G_A
70	10	69929058	69929058	CC_MTAG	MYPN	MYPN = 1	MYPN						MYPN	CC unique	CC unique		CC					MYPN	MYPN	MYPN	MYPN			rs7911060	chr10:69929058_C_T
71	10	75409877	75462510	HCM_GWAS,CC_GWAS,CC_MTAG,HCM_MTAG,DCM_GWAS,DCM_MTAG	MYOZ1, CAMK2G, VCL, ADK, SYNPO2L, PPP3CB, FUT11	MYOZ1 = 2.5, CAMK2G = 2, VCL = 2, ADK = 1, SYNPO2L = 3.5, PPP3CB = 0.5, FUT11 = 0.5	SYNPO2L	VCL/SYNPO2L, VCL/PPP3CB	ADK/SYNPO2L	MYOZ1/SYNPO2L, MYOZ1/FUT11	MYOZ1/SYNPO2L	CAMK2G/MYOZ1, CAMK2G	VCL/SYNPO2L, VCL/CAMK2G		DCM & HCM & CC	DCM & HCM & CC	DCM & HCM & CC	CAMK2G	MYOZ1, CAMK2G	SYNPO2L, AGAP5	SYNPO2L	VCL	SYNPO2L, CAMK2G	SYNPO2L, FUT11	SYNPO2L	rs2177843	chr10:75409877_T_C	rs2177843	chr10:75409877_T_C
72	10	88450058	88473254	CC_MTAG	LDB3	LDB3 = 2	LDB3						LDB3	CC unique	CC unique		CC					LDB3	LDB3	LDB3	LDB3			rs12251655	chr10:88450058_A_C
73	10	93394295	93394295	DCM_GWAS	PPP1R3C	PPP1R3C = 1	PPP1R3C	PPP1R3C							Only DCM	DCM
74	10	114505037	114505465	HCM_GWAS,HCM_MTAG,CC_GWAS,CC_MTAG	VTI1A, TCF7L2	VTI1A = 3, TCF7L2 = 1	VTI1A			VTI1A	VTI1A	VTI1A	TCF7L2		CC & HCM	HCM & CC	HCM & CC	VTI1A	VTI1A	VTI1A	VTI1A	TCF7L2	TCF7L2	VTI1A	VTI1A	rs7918405	chr10:114505465_A_G	rs7918405	chr10:114505465_A_G
75	10	121415685	121433675	DCM_MTAG,CC_MTAG,HCM_MTAG,HCM_GWAS,DCM_GWAS,CC_GWAS	BAG3	BAG3 = 6	BAG3	BAG3	BAG3	BAG3	BAG3	BAG3	BAG3		DCM & HCM & CC	DCM & HCM & CC	DCM & HCM & CC	BAG3	BAG3	BAG3	BAG3	BAG3	BAG3	BAG3	BAG3	rs72842207	chr10:121433675_T_C	rs17617337	chr10:121426884_T_C
76	11	10238974	10238974	CC_MTAG	ADM	ADM = 1	ADM						ADM	CC unique	CC unique		CC					ADM	ADM	ADM	SBF2			rs1822293	chr11:10238974_G_A
77	11	14038621	14380828	DCM_MTAG,CC_MTAG,HCM_MTAG,HCM_GWAS,CC_GWAS	RRAS2, ARNTL	RRAS2 = 6.5, ARNTL = 0.5	RRAS2		RRAS2	RRAS2	RRAS2	RRAS2	ARNTL/RRAS2, RRAS2		DCM & HCM & CC	HCM & CC	DCM & HCM & CC	RRAS2	RRAS2	RRAS2	RRAS2	ARNTL, RRAS2	RRAS2	RRAS2	RRAS2	rs10832246	chr11:14380828_A_G	rs10832246	chr11:14380828_A_G
78	11	19234797	19234797	DCM_MTAG	CSRP3	CSRP3 = 1	CSRP3		CSRP3						Only DCM		DCM
79	11	100942792	101010503	DCM_MTAG,CC_MTAG,HCM_MTAG,CC_GWAS	PGR	PGR = 4	PGR		PGR		PGR	PGR	PGR		DCM & HCM & CC	CC	DCM & HCM & CC	PGR	PGR	PGR	PGR	PGR	PGR	PGR	PGR	rs676904	chr11:101010503_A_G	rs676904	chr11:101010503_A_G
80	11	111787962	111787962	CC_MTAG	CRYAB	CRYAB = 1	CRYAB						CRYAB	CC unique	CC unique		CC					CRYAB	CRYAB	DIXDC1	CRYAB			rs10891299	chr11:111787962_T_G
81	12	20588575	20589183	CC_GWAS,CC_MTAG,HCM_MTAG	PDE3A	PDE3A = 3	PDE3A				PDE3A	PDE3A	PDE3A		CC & HCM	CC	HCM & CC	PDE3A	PDE3A	PDE3A	PDE3A	PDE3A	PDE3A	PDE3A	PDE3A	rs10841523	chr12:20588575_A_G	rs10841523	chr12:20588575_A_G
82	12	26330372	26348304	DCM_MTAG,CC_MTAG,CC_GWAS,HCM_MTAG	SSPN	SSPN = 4	SSPN		SSPN		SSPN	SSPN	SSPN		DCM & HCM & CC	CC	DCM & HCM & CC	SSPN	SSPN	SSPN	SSPN	SSPN	SSPN	SSPN	SSPN	rs58747679	chr12:26348304_C_T	rs17380837	chr12:26345526_T_C
83	12	32980161	32980161	CC_GWAS	PKP2	PKP2 = 1	PKP2					PKP2		CC unique	CC unique	CC		PKP2	PKP2	PKP2	PKP2					rs2045172	chr12:32980161_T_G
84	12	115361930	115381147	CC_GWAS,CC_MTAG,HCM_MTAG,HCM_GWAS	TBX5, TBX3	TBX5 = 2.5, TBX3 = 1.5	TBX5			TBX5/TBX3	TBX5	TBX5/TBX3	TBX5/TBX3		CC & HCM	HCM & CC	HCM & CC	TBX5	TBX3	TBX3	TBX3	TBX5	TBX3	TBX3	TBX3	rs7132327	chr12:115381071_C_T	rs7487962	chr12:115361930_G_A
85	12	119610485	119613125	CC_GWAS,DCM_GWAS,DCM_MTAG,CC_MTAG	HSPB8	HSPB8 = 4	HSPB8	HSPB8	HSPB8			HSPB8	HSPB8		CC & DCM	DCM & CC	DCM & CC	HSPB8	HSPB8	HSPB8	HSPB8	HSPB8	HSPB8	HSPB8	HSPB8	rs722306	chr12:119610485_G_A	rs6490243	chr12:119613125_A_G
86	12	120668534	120671647	HCM_MTAG,CC_MTAG	HNF1A, PXN	HNF1A = 0.5, PXN = 1.5	PXN				HNF1A/PXN		PXN		CC & HCM		HCM & CC					PXN	PXN	PXN	PXN			rs76382809	chr12:120671647_T_C
87	12	121881848	121881848	CC_MTAG,HCM_MTAG	MLXIP, KDM2B, RNF34	MLXIP = 0.5, KDM2B = 1, RNF34 = 0.5	MLXIP/KDM2B/RNF34				KDM2B*		MLXIP/RNF34		CC & HCM		HCM & CC					MLXIP	RNF34	RNF34	KDM2B			rs10849885	chr12:121881848_A_G
88	13	110895092	111040798	CC_MTAG,HCM_MTAG	COL4A1, COL4A2	COL4A1 = 3, COL4A2 = 1	COL4A1				COL4A1/COL4A2		COL4A1, COL4A1/COL4A2		CC & HCM		HCM & CC					COL4A1	COL4A1, COL4A2	COL4A1, COL4A2	COL4A2			rs9515201	chr13:111040798_C_A
89	13	114055313	114078558	HCM_GWAS,CC_GWAS,HCM_MTAG,CC_MTAG	ADPRHL1, F10	ADPRHL1 = 6.5, F10 = 0.5	ADPRHL1			ADPRHL1	ADPRHL1	ADPRHL1	F10/ADPRHL1		CC & HCM	HCM & CC	HCM & CC	ADPRHL1	ADPRHL1	ADPRHL1	ADPRHL1	F10	ADPRHL1	ADPRHL1	ADPRHL1	rs41306688	chr13:114078558_C_A	rs41306688	chr13:114078558_C_A
90	14	53313097	53331679	DCM_MTAG,HCM_GWAS,CC_MTAG,HCM_MTAG,CC_GWAS	FERMT2	FERMT2 = 5	FERMT2		FERMT2	FERMT2	FERMT2	FERMT2	FERMT2		DCM & HCM & CC	HCM & CC	DCM & HCM & CC	FERMT2	FERMT2	FERMT2	FERMT2	FERMT2	FERMT2	FERMT2	FERMT2	rs17694496	chr14:53331679_C_T	rs113907726	chr14:53316867_G_T
91	14	71748353	71834210	CC_MTAG,HCM_MTAG	PCNX, RGS6, SIPA1L1	PCNX = 1, RGS6 = 0.5, SIPA1L1 = 0.5	PCNX/RGS6/SIPA1L1				RGS6/SIPA1L1		PCNX		CC & HCM		HCM & CC					PCNX	PCNX	SIPA1L1	SIPA1L1			rs17767386	chr14:71748353_C_T
92	14	88946053	89884723	CC_GWAS,CC_MTAG,HCM_MTAG,DCM_MTAG	FOXN3, ZC3H14, PTPN21, SPATA7	FOXN3 = 3, ZC3H14 = 0.5, PTPN21 = 1, SPATA7 = 0.5	FOXN3		FOXN3		ZC3H14/PTPN21	FOXN3/PTPN21	FOXN3/SPATA7, FOXN3		DCM & HCM & CC	CC	DCM & HCM & CC	FOXN3	PTPN21	PTPN21	PTPN21	FOXN3	SPATA7, FOXN3	SPATA7, FOXN3	FOXN3	rs28617592	chr14:88946053_T_G	rs11626401	chr14:89884723_A_G
93	14	95219657	95219657	HCM_GWAS,HCM_MTAG	DICER1, GSC	DICER1 = 1, GSC = 1	DICER1/GSC			DICER1/GSC	DICER1/GSC				Only HCM	HCM	HCM
94	15	79053014	79082431	CC_GWAS,HCM_MTAG,DCM_GWAS,CC_MTAG,DCM_MTAG	CHRNB4, ADAMTS7, CRABP1, CTSH	CHRNB4 = 1, ADAMTS7 = 2.5, CRABP1 = 1, CTSH = 0.5	ADAMTS7	CRABP1/ADAMTS7	CTSH/ADAMTS7		ADAMTS7	CHRNB4	CRABP1/ADAMTS7		DCM & HCM & CC	DCM & CC	DCM & HCM & CC	CHRNB4	CHRNB4	ADAMTS7	ADAMTS7	CRABP1	ADAMTS7	ADAMTS7	ADAMTS7	rs2002854	chr15:79053014_G_A	rs57708073	chr15:79066653_G_A
95	15	85248133	86304260	CC_GWAS,HCM_MTAG,HCM_GWAS,CC_MTAG,DCM_MTAG	AKAP13, ADAMTSL3, ALPK3, ZNF592, NMB	AKAP13 = 4.5, ADAMTSL3 = 1.5, ALPK3 = 3, ZNF592 = 0.5, NMB = 0.5	AKAP13		AKAP13/NMB	ADAMTSL3/ALPK3	ADAMTSL3/ALPK3	AKAP13/ALPK3, AKAP13	AKAP13/ZNF592, AKAP13/ALPK3, AKAP13		DCM & HCM & CC	HCM & CC	DCM & HCM & CC	AKAP13	ALPK3, AKAP13	ZNF592, WDR73, AKAP13	SEC11A	AKAP13	ZNF592, ALPK3, AKAP13	SEC11A, ALPK3, AKAP13	ZNF592	rs35316992	chr15:85248133_G_A	rs11073729	chr15:85350081_C_T
96	16	754314	1025464	CC_GWAS,DCM_MTAG,DCM_GWAS,CC_MTAG,HCM_MTAG	UBE2I, SOX8, RHOT2, LMF1	UBE2I = 2.5, SOX8 = 1, RHOT2 = 0.5, LMF1 = 2	UBE2I/LMF1	UBE2I/LMF1	UBE2I/LMF1		SOX8	UBE2I/RHOT2, UBE2I/LMF1	UBE2I/LMF1		DCM & HCM & CC	DCM & CC	DCM & HCM & CC	UBE2I	RHOT2, LMF1	RHOT2, LMF1	LMF1	UBE2I	LMF1	LMF1	LMF1	rs9888914	chr16:970814_C_T	rs2729577	chr16:1009035_G_A
97	16	2191734	2238931	CC_GWAS,CC_MTAG,HCM_MTAG	SLC9A3R2, SRRM2, TCEB2, PKD1	SLC9A3R2 = 1.5, SRRM2 = 0.5, TCEB2 = 0.5, PKD1 = 0.5	SLC9A3R2				TCEB2/PKD1	SLC9A3R2	SRRM2/SLC9A3R2		CC & HCM	CC	HCM & CC	SLC9A3R2	SLC9A3R2	TRAF7	RAB26	SRRM2	SLC9A3R2	SLC9A3R2	RAB26	rs258281	chr16:2191734_G_A	rs258281	chr16:2191734_G_A
98	16	4257286	4266062	CC_GWAS,CC_MTAG,HCM_MTAG	CREBBP, SRL	CREBBP = 1.5, SRL = 1.5	CREBBP/SRL				CREBBP/SRL	CREBBP/SRL	CREBBP/SRL		CC & HCM	CC	HCM & CC	CREBBP	SRL	SRL	SRL	CREBBP	SRL	SRL	SRL	rs9924822	chr16:4257286_C_T	rs889807	chr16:4258173_C_T
99	16	68036666	68128104	CC_GWAS,CC_MTAG	NFATC3, CDH1	NFATC3 = 1.5, CDH1 = 0.5	NFATC3					NFATC3	CDH1/NFATC3	CC unique	CC unique	CC	CC	NFATC3	NFATC3	NFATC3	DUS2	CDH1	NFATC3	DUS2	NFATC3	rs8059305	chr16:68036666_C_A	rs12599178	chr16:68128104_G_A
100	17	1256074	2055300	CC_MTAG,DCM_MTAG,DCM_GWAS	CRK, MYO1C, SMG6, HIC1	CRK = 1.5, MYO1C = 1.5, SMG6 = 0.5, HIC1 = 0.5	CRK/MYO1C	CRK/SMG6	MYO1C				CRK/MYO1C, CRK/HIC1		CC & DCM	DCM	DCM & CC					CRK	MYO1C, HIC1	MYO1C, HIC1	YWHAE			rs75543711	chr17:1256074_A_G
101	17	43688317	44247164	HCM_MTAG,HCM_GWAS,DCM_MTAG,CC_MTAG,CC_GWAS	CRHR1, MAPT	CRHR1 = 0.5, MAPT = 5.5	MAPT		MAPT	MAPT	CRHR1/MAPT	MAPT	MAPT		DCM & HCM & CC	HCM & CC	DCM & HCM & CC	MAPT	MAPT	MAPT	MAPT	MAPT	MAPT	MAPT	MAPT	rs17571739	chr17:44032915_C_T	rs242557	chr17:44019712_A_G
102	17	53374610	53382829	DCM_MTAG,CC_MTAG,HCM_MTAG,CC_GWAS	HLF	HLF = 4	HLF		HLF		HLF	HLF	HLF		DCM & HCM & CC	CC	DCM & HCM & CC	HLF	HLF	HLF	HLF	HLF	HLF	HLF	HLF	rs3794752	chr17:53382829_C_T	rs12452367	chr17:53374610_C_T
103	17	64283326	64331601	DCM_MTAG,CC_MTAG,HCM_MTAG,HCM_GWAS,CC_GWAS,DCM_GWAS	PRKCA	PRKCA = 7	PRKCA	PRKCA	PRKCA	PRKCA	PRKCA	PRKCA	PRKCA		DCM & HCM & CC	DCM & HCM & CC	DCM & HCM & CC	PRKCA	PRKCA	PRKCA	PRKCA	PRKCA	PRKCA	PRKCA	PRKCA	rs4577128	chr17:64308473_C_T	rs9892651	chr17:64303793_T_C
104	18	32670021	32672836	CC_MTAG,HCM_MTAG	MAPRE2	MAPRE2 = 2	MAPRE2				MAPRE2		MAPRE2		CC & HCM		HCM & CC					MAPRE2	MAPRE2	MAPRE2	MAPRE2			rs476348	chr18:32670021_C_T
105	18	33905313	34575110	HCM_GWAS,CC_GWAS,CC_MTAG,HCM_MTAG,DCM_MTAG,DCM_GWAS	FHOD3, KIAA1328	FHOD3 = 23, KIAA1328 = 1	FHOD3	FHOD3	FHOD3	FHOD3, FHOD3/KIAA1328	FHOD3, FHOD3/KIAA1328	FHOD3	FHOD3		DCM & HCM & CC	DCM & HCM & CC	DCM & HCM & CC	FHOD3	FHOD3	FHOD3	FHOD3	FHOD3	FHOD3	FHOD3	FHOD3	rs2644262	chr18:34223566_C_T	rs2644262	chr18:34223566_C_T
106	18	55919898	56010797	DCM_GWAS,DCM_MTAG,HCM_GWAS,CC_GWAS,CC_MTAG,HCM_MTAG	NEDD4L	NEDD4L = 12	NEDD4L	NEDD4L	NEDD4L	NEDD4L	NEDD4L	NEDD4L	NEDD4L		DCM & HCM & CC	DCM & HCM & CC	DCM & HCM & CC	NEDD4L	NEDD4L	NEDD4L	NEDD4L	NEDD4L	NEDD4L	NEDD4L	NEDD4L	rs6566955	chr18:55922789_G_A	rs11660748	chr18:55919898_G_A
107	19	46292649	46375779	DCM_MTAG,HCM_GWAS,CC_GWAS,CC_MTAG,HCM_MTAG	VASP, DMPK, CKM, DMWD, FOXA3	VASP = 2, DMPK = 6.5, CKM = 1, DMWD = 1, FOXA3 = 0.5	DMPK		VASP/DMWD, VASP/DMPK	DMPK/DMWD, DMPK	CKM/DMPK	VASP/DMPK	DMPK, DMPK/FOXA3		DCM & HCM & CC	HCM & CC	DCM & HCM & CC	VASP	DMPK	DMWD, RSPH6A	RSPH6A	DMPK	DMPK, FOXA3	DMWD, FOXA3	RSPH6A	rs12460541	chr19:46312077_A_G	rs12460541	chr19:46312077_A_G
108	20	33523840	33590358	CC_MTAG,CC_GWAS,DCM_MTAG	ITCH, NCOA6, MAP1LC3A, GSS	ITCH = 0.5, NCOA6 = 1.5, MAP1LC3A = 0.5, GSS = 0.5	NCOA6		MAP1LC3A/NCOA6			NCOA6	ITCH/GSS		CC & DCM	CC	DCM & CC	NCOA6	NCOA6	GGT7	GSS	ITCH	GSS	GSS	GSS	rs2273684	chr20:33529766_G_T	rs2236271	chr20:33523840_C_A
109	21	30530131	30530131	DCM_GWAS,DCM_MTAG,HCM_GWAS,CC_GWAS,CC_MTAG,HCM_MTAG	BACH1, MAP3K7CL	BACH1 = 4, MAP3K7CL = 2	BACH1	BACH1/MAP3K7CL	BACH1/MAP3K7CL	BACH1	BACH1	BACH1/MAP3K7CL	BACH1/MAP3K7CL		DCM & HCM & CC	DCM & HCM & CC	DCM & HCM & CC	BACH1	MAP3K7CL	MAP3K7CL	MAP3K7CL	BACH1	MAP3K7CL	MAP3K7CL	MAP3K7CL	rs62222424	chr21:30530131_A_G	rs62222424	chr21:30530131_A_G
110	21	40569508	40644170	CC_GWAS,DCM_MTAG,CC_MTAG	SH3BGR, BRWD1	SH3BGR = 1.5, BRWD1 = 1.5	SH3BGR/BRWD1		SH3BGR/BRWD1			SH3BGR/BRWD1	SH3BGR/BRWD1		CC & DCM	CC	DCM & CC	SH3BGR	BRWD1	BRWD1	BRWD1	SH3BGR	BRWD1	BRWD1	BRWD1	rs62222988	chr21:40569508_C_T	rs8134638	chr21:40644170_C_T
111	22	24161717	24171305	DCM_MTAG,HCM_GWAS,CC_MTAG,HCM_MTAG,CC_GWAS,DCM_GWAS	VPREB3, CHCHD10, SMARCB1, MMP11	VPREB3 = 1.5, CHCHD10 = 0.5, SMARCB1 = 2.5, MMP11 = 1.5	SMARCB1	SMARCB1	VPREB3/MMP11	CHCHD10/SMARCB1	VPREB3/MMP11	VPREB3/MMP11	SMARCB1		DCM & HCM & CC	DCM & HCM & CC	DCM & HCM & CC	VPREB3	MMP11	MMP11	SMARCB1	SMARCB1	SMARCB1	MMP11	SMARCB1	rs5760054	chr22:24161717_T_C	rs5760054	chr22:24161717_T_C
112	22	26162902	26162902	CC_MTAG	MYO18B	MYO18B = 1	MYO18B						MYO18B	CC unique	CC unique		CC					MYO18B	MYO18B	MYO18B	MYO18B			rs4820654	chr22:26162902_G_A
113	22	40726749	40726749	HCM_MTAG	RBX1, TNRC6B	RBX1 = 0.5, TNRC6B = 0.5	RBX1/TNRC6B				RBX1/TNRC6B				Only HCM		HCM
Total number of loci								37	63	33	67	67	95
Note: Locus number, sequential identifier for each locus assigned accross all studies; CHR, chromosome number (GRCh37); Start BP, base-pair start coordinate of the locus (GRCh37); End BP, base-pair end coordinate of the locus (GRCh37); GWAS/MTAG in which loci identified, studies in which the locus reached genome-wide significance (DCM, HCM, or case–case [CC] GWAS or MTAG); All identified genes fr…

## Sheet: ST3 Genetic correlations DCM, H
	DCM	HCM	-Ecc	LVESVi	LVconc
DCM (from DCM GWAS, Jurgens et al., 2024)	1	-0.577	-0.6601	0.6134	-0.355
HCM (from HCM GWAS, Tadros et al., 2025)		1	0.6228	-0.5021	0.657
-Ecc			1	0.7715	-0.3883
LVESVi				1	-0.4906
LVconc					1
Note: DCM, dilated cardiomyopathy; HCM, hypertrophic cardiomyopathy; -Ecc, negative values of global circumferential strain; LVESVi, left ventricular end-systolic volume indexed to body-mass index; LVconc, left ventricular concentricity

## Sheet: ST4 Comparison of lead variant 
				HCM GWAS				DCM GWAS				In which GWAS reached significance	Note: loci_n, locus number corresponding to cross-trait analysis; CHR, chromosome; BP, basepair position of the lead variant;CHRPOS, variant ID (CHR:POS:A1:A2); rsID, dbSNP identifier for the lead variant; BETA, effect size; SE, standart error.
loci_n	rsID	CHR	BP	CHRPOS	BETA	P	SE	CHRPOS	BETA	P	SE
4	rs1763605	1	16338925	1:16338925:G:T	-0.25	2.43e-29	0.02	1:16338925:G:T	0.23	8.61e-37	0.02	Both
6	rs12743512	1	45954033	1:45954033:A:G	-0.05	0.0379	0.02	1:45954033:A:G	0.1	5.23e-09	0.02	DCM
7	rs7515823	1	50841382	1:50841382:G:A	-0.01	0.551	0.02	1:50841382:G:A	0.06	0.00125	0.02	DCM
8	rs2474370	1	61886891	1:61886891:C:T	-0.07	0.00161	0.02	1:61886891:C:T	0.14	1.36e-12	0.02	DCM
15	rs4659701	1	237000000	1:236853167:A:G	-0.08	0.000403	0.02	1:236853167:A:G	0.14	1.64e-15	0.02	DCM
16	rs11687178	2	11584197	2:11584197:A:C	-0.14	7.7e-09	0.02	2:11584197:A:C	0.09	1.71e-06	0.02	HCM
17	rs2049367	2	36668219	2:36668219:A:C	0	0.841	0.02	2:36668219:A:C	0.13	9.73e-13	0.02	Both
20	rs2540277	2	103000000	2:103426177:T:C	-0.28	2.31e-08	0.05	2:103426177:T:C	0.19	2.67e-08	0.03	Both
21	rs75520577	2	160000000	2:159973808:G:A	-0.07	0.145	0.05	2:159973808:G:A	0.01	0.667	0.03	DCM
23	rs56005624	2	180000000	2:179774634:T:G	-0.2	8.31e-11	0.03	2:179774634:T:G	0.01	0.666	0.03	Both
24	rs4673912	2	201000000	2:201168993:T:G	-0.07	0.00284	0.02	2:201168993:T:G	0.1	8.33e-09	0.02	DCM
25	rs1505356	2	213000000	2:213205001:C:A	-0.03	0.156	0.02	2:213205001:C:A	0.12	4.78e-10	0.02	DCM
26	rs34272434	2	220000000	2:220406088:T:C	-0.13	3.03e-08	0.02	2:220406088:T:C	0.02	0.344	0.02	HCM
27	rs4642101	3	12842223	3:12842223:G:T	-0.1	3.9e-05	0.02	3:12842223:G:T	0.11	3.73e-11	0.02	DCM
28	rs17226476	3	14276982	3:14276982:A:G	-0.19	2.72e-12	0.03	3:14276982:A:G	0.18	6.07e-22	0.02	Both
31	rs6796333	3	52359678	3:52359678:C:T	-0.15	8.02e-08	0.03	3:52359678:C:T	0.08	0.000485	0.02	DCM
33	rs9790188	3	107000000	3:106995323:T:G	-0.1	0.000175	0.03	3:106995323:T:G	0.05	0.0127	0.02	DCM
34	rs1836688	3	158000000	3:158311547:G:A	-0.09	5.84e-05	0.02	3:158311547:G:A	0.11	1.86e-11	0.02	DCM
36	rs4894803	3	172000000	3:171800256:A:G	-0.17	2.19e-13	0.02	3:171800256:A:G	0.08	6.56e-06	0.02	HCM
42	rs2129982	4	112000000	4:111704143:G:A	-0.02	0.478	0.03	4:111704143:G:A	0.13	5.57e-12	0.02	DCM
43	rs56087422	4	114000000	4:114444394:G:A	-0.03	0.229	0.03	4:114444394:G:A	0.12	5.3e-10	0.02	DCM
45	rs10487613	5	56976098	5:56976098:A:G	-0.2	2.52e-12	0.03	5:56976098:A:G	0.13	6.56e-10	0.02	Both
46	rs10052399	5	139000000	5:138668504:C:T	-0.17	3.99e-11	0.03	5:138668504:C:T	0.11	1.19e-08	0.02	Both
49	rs4713999	6	36633069	6:36633069:G:A	-0.18	5.87e-15	0.02	6:36633069:G:A	0.17	3.78e-21	0.02	Both
50	rs625899	6	53957588	6:53957588:T:C	-0.09	0.000253	0.02	6:53957588:T:C	0.11	1e-09	0.02	DCM
52	rs72962906	6	119000000	6:119008305:T:C	-0.14	1.04e-10	0.02	6:119008305:T:C	0.1	2.79e-09	0.02	Both
53	rs9320939	6	124000000	6:123818871:G:A	-0.12	1.04e-08	0.02	6:123818871:G:A	0.02	0.244	0.02	HCM
58	rs66520020	7	128000000	7:128438284:C:T	-0.2	5.87e-11	0.03	7:128438284:C:T	0.21	6.58e-17	0.02	Both
61	rs7824244	8	21802432	8:21802432:G:A	-0.2	2.39e-10	0.03	8:21802432:G:A	0.02	0.424	0.03	HCM
64	rs7461129	8	126000000	8:125861374:C:T	-0.15	8.19e-11	0.02	8:125861374:C:T	0.14	4.67e-15	0.02	Both
68	rs2645210	10	4098453	10:4098453:G:A	-0.15	3.94e-08	0.03	10:4098453:G:A	0.08	0.000283	0.02	HCM
71	rs2177843	10	75409877	10:75409877:C:T	-0.24	2.8e-15	0.03	10:75409877:C:T	0.17	2e-12	0.02	Both
73	rs11186636	10	93394295	10:93394295:C:T	-0.04	0.231	0.04	10:93394295:C:T	0.16	6.87e-09	0.03	DCM
74	rs11196085	10	115000000	10:114505037:T:C	-0.2	1.85e-17	0.02	10:114505037:T:C	0.05	0.012	0.02	HCM
75	rs2234962	10	121000000	10:121429633:T:C	-0.37	1.39e-49	0.03	10:121429633:T:C	0.36	1.83e-57	0.02	Both
77	rs12270374	11	14375079	11:14375079:T:C	-0.14	6.85e-10	0.02	11:14375079:T:C	0.08	1.87e-05	0.02	HCM
84	rs7301677	12	115000000	12:115381147:T:C	-0.21	7.01e-16	0.03	12:115381147:T:C	0.07	0.000348	0.02	HCM
85	rs6490242	12	120000000	12:119610739:T:C	-0.05	0.0347	0.02	12:119610739:T:C	0.12	2.49e-09	0.02	DCM
89	rs41306688	13	114000000	13:114078558:A:C	-0.47	3.04e-15	0.06	13:114078558:A:C	0.1	0.08	0.06	HCM
90	rs113907726	14	53316867	14:53316867:T:G	-0.15	4.1e-08	0.03	14:53316867:T:G	0.1	6.56e-06	0.02	HCM
93	rs8006225	14	95219657	14:95219657:T:G	-0.2	2.64e-11	0.03	14:95219657:T:G	0	0.952	0.02	HCM
94	rs62012629	15	79070351	15:79070351:C:A	-0.11	2.18e-05	0.02	15:79070351:C:A	0.13	3.43e-11	0.02	DCM
95	rs8033459	15	85253258	15:85253258:C:T	-0.19	7.04e-18	0.02	15:85253258:C:T	0.05	0.00241	0.02	HCM
96	rs2729577	16	1009035	16:1009035:A:G	-0.06	0.00511	0.02	16:1009035:A:G	0.12	8e-13	0.02	DCM
100	rs923862	17	2031382	17:2031382:C:A	-0.05	0.0273	0.02	17:2031382:C:A	0.1	1.08e-08	0.02	DCM
101	rs28768976	17	43688317	17:43688317:A:G	-0.24	7.43e-21	0.03	17:43688317:A:G	0.04	0.107	0.03	HCM
103	rs4577128	17	64308473	17:64308473:T:C	-0.21	3.26e-21	0.02	17:64308473:T:C	0.13	2.77e-14	0.02	Both
105	rs2644262	18	34223566	18:34223566:T:C	-0.33	1.79e-43	0.02	18:34223566:T:C	0.13	3.39e-10	0.02	Both
106	rs11660748	18	55919898	18:55919898:G:A	-0.15	2.32e-05	0.04	18:55919898:G:A	0.22	1.53e-12	0.03	Both
107	rs12460541	19	46312077	19:46312077:A:G	-0.15	6.01e-11	0.02	19:46312077:A:G	0.07	0.000194	0.02	HCM
109	rs62222424	21	30530131	21:30530131:A:G	-0.28	1.21e-09	0.05	21:30530131:A:G	0.27	2.7e-12	0.04	Both
111	rs5760054	22	24161717	22:24161717:T:C	-0.27	6.62e-25	0.03	22:24161717:T:C	0.18	7.26e-16	0.02	Both

## Sheet: ST5 LAVA univariate & bivariate
				Univariate analysis								Bivariate analysis (n = 101)						Note: DCM, dilated cardiomyopathy; HCM, hypertrophic cardiomyopathy; region, genomic region tested; chr, chromosome; start and stop, genomic coordinates marking the beginning and end of each locus (in base pairs); n.snps, number of single nucleotide polymorphisms (SNPs) included in the analysis within the locus; n.pcs, number of principal components used to model local linkage disequilibrium (GRC…
				DCM GWAS				HCM GWAS
Region	chr	start	stop	n.snps	n.pcs	h2.obs	p	n.snps	n.pcs	h2.obs	p	rho	p	sign	gene	GWAS/MTAG
1	1	10539	1376204	7	4	2.97145e-06	0.144997
2	1	1376205	2215495	102	28	4.56234e-05	1.17107e-05	102	28	0.00395644	0.0271591
3	1	2215496	2983519	187	73	5.91945e-05	5.28187e-05	187	73	0.00333009	0.105189
4	1	2983520	3582047	120	63	3.61998e-05	0.00343295	120	63	0.0017016	0.22853
5	1	3582048	4281476	188	81	1.96776e-05	0.0759146	188	81	0.00350732	0.101696
6	1	4281477	4773403	352	122	3.64639e-05	0.0181246	352	122	0.0114986	0.00142046
7	1	4773404	5362404	1083	173	6.6747e-05	0.000876571	1083	173	0.0142496	0.0002328
8	1	5362405	6136814	1611	218	6.85786e-05	0.00175081	1611	218	0.014905	0.000583654
9	1	6136815	7711794	2638	286	0.000116887	1.21127e-05	2638	286	0.036219	1.21878e-12	-0.434336	0.00769806	0
10	1	7711795	8580987	1733	204	2.78861e-05	0.0936051	1733	204	0.0142822	0.00026577
11	1	8580988	9475966	1689	260	2.37941e-05	0.153239	1689	260	0.0324956	3.40547e-11
12	1	9475967	10753427	1732	180	4.34787e-05	0.0181152	1732	180	0.0291121	2.05744e-09
13	1	10753428	11709173	1179	182	8.47085e-05	7.55427e-05	1179	182	0.0242201	1.33726e-07
14	1	11709174	13481025	1921	219	9.10173e-05	8.64644e-05	1921	219	0.0242561	6.7653e-08
15	1	13481026	14720131	2624	265	9.84906e-05	9.43183e-05	2624	265	0.0116282	0.00313834
16	1	14720132	15755230	2475	296	0.000107965	5.24976e-05	2475	296	0.0161058	6.80887e-05
17	1	15755231	16732168	1995	154	0.000245865	2.49317e-22	1995	154	0.0494694	3.80391e-21	-0.765791	4.00025e-12	1	HSPB7	DCM_GWAS,CC_GWAS,CC_MTAG,DCM_MTAG,HCM_GWAS,HCM_MTAG
18	1	16732169	17557746	868	123	4.19583e-05	0.0087342	868	123	0.0175092	1.16971e-05
19	1	17557747	18427820	1920	213	2.99425e-05	0.083501	1920	213	0.0099141	0.00689682
20	1	18427821	19238924	2095	279	5.56048e-05	0.0149199	2095	279	0.0352294	2.75588e-11
21	1	19238925	20556202	3153	280	7.78663e-05	0.00157191	3153	280	0.030873	4.162e-09
22	1	20556203	21416121	1755	171	2.64236e-05	0.08715	1755	171	0.0185371	1.54864e-05
23	1	21416122	22145629	1709	194	4.1452e-05	0.0260783	1709	194	0.000301753	0.266642
24	1	22145630	22740287	1560	190	7.51807e-05	0.000401153	1560	190	0.0158947	7.94369e-05
25	1	22740288	23907045	1567	193	3.96772e-05	0.0308176	1567	193	0.0147316	0.000344147
26	1	23907046	25885138	2859	286	0.000168993	2.74442e-09	2859	286	0.0246252	4.04199e-07	0.0281585	0.863182	0
27	1	25885139	27992665	2208	228	6.98393e-05	0.00178021	2208	228	0.0222945	7.03694e-07
28	1	27992666	29188426					1504	155	0.0100161	0.00441027
29	1	29188427	30405182	2038	243	1.57794e-05	0.234635	2038	243	0.00904644	0.00662063
30	1	30405183	31639217	2567	253	8.94681e-05	0.000240909	2567	253	0.0142331	0.000653542
31	1	31639218	33066846	1444	164	4.39462e-05	0.0139361	1444	164	0.00500532	0.0605024
32	1	33066847	34371022	1831	208	1.35193e-05	0.249868	1831	208	0.00936968	0.00728799
33	1	34371023	35201626	1669	216	8.14784e-05	0.000310826	1669	216	0.0259008	1.06183e-07
34	1	35201627	36855139	728	138	3.78114e-06	0.392452	728	138	0.00691564	0.0289139
35	1	36855140	38474036					2848	270	0.0156799	9.32886e-05
36	1	38474037	40200950	2699	267	5.81643e-05	0.0104985	2699	267	0.00060751	0.123933
37	1	40200951	41093875	1602	169	2.70132e-05	0.0819039	1602	169	0.0134856	0.000766476
38	1	41093876	41977966	2045	216	5.46444e-05	0.00852617	2045	216	0.021921	1.28311e-06
39	1	41977967	43512669					2590	190	0.0181659	1.12905e-05
40	1	43512670	45167235	2472	244	2.63441e-05	0.123924	2472	244	0.0139529	0.000286978
41	1	45167236	47257261	2812	155	8.91401e-05	1.2831e-05	2812	155	0.0216711	5.7328e-07	-0.366983	0.0650443	0
42	1	47257262	48105233	1360	143	2.68135e-05	0.0683413	1360	143	0.00793532	0.0139967
43	1	48105234	49185414	1924	208	1.52027e-05	0.226606	1924	208	0.000442089	0.268823
44	1	49185415	51777577	1558	104	2.32291e-06	0.415131	1558	104	0.0099786	0.000181916
45	1	51777578	53114186	1394	97	5.83232e-06	0.324689	1394	97	0.0115642	0.000416323
46	1	53114187	54771293	2729	272	2.19808e-05	0.175518	2729	272	0.0318865	8.16555e-11
47	1	54771294	55727134	2235	261	1.75643e-05	0.219737	2235	261	0.0210658	1.20698e-06
48	1	55727135	56799636	2236	164	1.96608e-05	0.145795	2236	164	0.00895933	0.00417928
49	1	56799637	57529670					1498	171	0	0.320384
50	1	57529671	58387483					1797	187	0.0084817	0.0145207
51	1	58387484	59889045					2985	254	0.00419952	0.0392072
52	1	59889046	61377615	2501	242	4.31319e-05	0.0337492	2501	242	0.00853926	0.012781
53	1	61377616	62778733	2902	296	0.000114653	2.10929e-05	2902	296	0.0334058	9.89482e-12	-0.436632	0.00955895	0
54	1	62778734	64344226					2693	248	0.0164703	0.000180684
55	1	64344227	65894184	2083	206	1.68345e-05	0.204318	2083	206	0.0220602	1.3459e-06
56	1	65894185	66778015	1495	121	2.01381e-05	0.1086	1495	121	0.000742193	0.334574
57	1	66778016	67761890	2172	171	7.33839e-06	0.3336	2172	171	0.0205508	2.14858e-06
58	1	67761891	68633860	1674	198	8.87557e-05	6.62727e-05	1674	198	0.00187007	0.151425
59	1	68633861	69438909	1737	155	1.15155e-05	0.252521	1737	155	0.0126973	0.000539762
60	1	69438910	70992905	2561	226	5.78435e-05	0.00685922	2561	226	0.0262455	1.55696e-08
61	1	70992906	72513119	1883	136	4.33153e-05	0.00946679	1883	136	0.0110015	0.00211545
62	1	72513120	73992170	2149	87	1.11106e-05	0.200471	2149	87	0.0104021	0.00140519
63	1	73992171	75132092	1516	129	1.17235e-05	0.230998	1516	129	0.0177224	1.12656e-05
64	1	75132093	76097247					1667	106	0.00192252	0.19512
65	1	76097248	76977915	1954	161	3.71255e-05	0.0286289	1954	161	0.00855272	0.0157486
66	1	76977916	77895394					1888	166	0.0048987	0.0542117
67	1	77895395	79065286	1964	142	6.4049e-05	0.000550268	1964	142	0.0102602	0.00436879
68	1	79065287	80099353	2245	116	3.6886e-06	0.38652	2245	116	0.00757306	0.0172764
69	1	80099354	80781442					1298	70	0.00282807	0.129867
70	1	80781443	82123368	2849	257	9.1404e-05	0.000202055	2849	257	0.00796194	0.017237
71	1	82123369	83461215	2917	210	2.73567e-05	0.100471	2917	210	0.0155543	0.000314094
72	1	83461216	84728347	1975	174	2.21497e-05	0.125889	1975	174	0.0135231	0.000710555
73	1	84728348	86017267					2839	255	0.0300275	9.07063e-10
74	1	86017268	86761554	1840	136	3.15241e-05	0.0388689	1840	136	0.00422642	0.0234594
75	1	86761555	87667572					1759	129	0.00633361	0.0148997
76	1	87667573	88656689	1652	225	4.00196e-05	0.0390845	1652	225	0.0315864	2.00316e-11
77	1	88656690	89753964	1863	157	2.76368e-05	0.0710138	1863	157	0.0145353	0.000163339
78	1	89753965	90941549	1967	213	0.000187621	8.19192e-13	1967	213	0.0258871	1.31918e-07	-0.0161031	0.915407	0
79	1	90941550	91870059	1797	182	6.52731e-05	0.00132004	1797	182	0.0150153	0.00020706
80	1	91870060	92904465	1917	188	2.17013e-06	0.435771	1917	188	0.0232339	2.06639e-07
81	1	92904466	94168576					1671	117	0.0159206	2.07332e-05
82	1	94168577	95122541	1586	172	6.18043e-05	0.00169277	1586	172	0.00586817	0.0450414
83	1	95122542	96147576	2157	186	3.52473e-05	0.0441503	2157	186	0.000793879	0.234724
84	1	96147577	97721186					2876	203	0.0103267	0.00356459
85	1	97721187	99425000	3079	222	4.17084e-05	0.0328178	3079	222	0.018112	3.58635e-05
86	1	99425001	100269207	1567	147	3.02206e-05	0.0505378	1567	147	0.0162807	5.19916e-05
87	1	100269208	101188315	1495	101	1.78529e-05	0.115421	1495	101	0.00814406	0.00708053
88	1	101188316	102424611	2477	208	2.76239e-05	0.0974247	2477	208	0.0183443	2.60384e-05
89	1	102424612	103148412	1279	81	1.7739e-05	0.0947284
90	1	103148413	103784541	1672	47	1.72334e-05	0.0539924	1672	47	0.00136945	0.242495
91	1	103784542	104984435	1565	123	4.81269e-05	0.00363733	1565	123	0.00232584	0.203739
92	1	104984436	106089656	2830	120	1.66529e-05	0.148684	2830	120	0.00754155	0.0150976
93	1	106089657	106864947					1434	134	0.00910561	0.0061222
94	1	106864948	107874653					1732	164	0.00720104	0.0185953
95	1	107874654	109271449	2413	216	8.86314e-05	0.000112513	2413	216	0.0205284	2.17652e-06
96	1	109271450	110224230					1776	197	0.00516515	0.0400118
97	1	110224231	111134062					1468	230	0.027706	9.65471e-08
98	1	111134063	112489248	3209	275	5.5532e-05	0.014473	3209	275	0.0171443	5.77474e-05
99	1	112489249	113418037	1592	200	2.73406e-06	0.426574	1592	200	0.00984086	0.00791935
100	1	113418038	114664387	1803	197	6.57245e-05	0.00169321	1803	197	0.00421202	0.0578383
101	1	114664388	116207297	2913	242	4.6597e-05	0.0247961	2913	242	0.0173003	5.53283e-05
102	1	116207298	117046311	1281	139	1.13477e-05	0.244857	1281	139	0.00732009	0.0219354
103	1	117046312	118118667	1593	206	6.34832e-05	0.00265279	1593	206	0.0295383	1.69629e-09
104	1	118118668	119408888	2277	178	2.99425e-05	0.0674327	2277	178	0.0245171	5.04274e-07
105	1	119408889	120345066	1674	181	7.69915e-06	0.331123	1674	181	0.0204569	2.10347e-06
106	1	120345067	145803848	140	16	7.91766e-06	0.0986377
107	1	145803849	147083835	1323	79	3.27802e-07	0.463621	1323	79	0.00409574	0.07398
108	1	147083836	149716037					616	79	0.00194111	0.20778
109	1	149716038	151146407	1437	105	2.47509e-05	0.056873	1437	105	0.0104216	0.00212266
110	1	151146408	152535630	1624	196	7.25176e-05	0.00067161	1624	196	0.0112521	0.00203459
111	1	152535631	153410809					1535	134	0.0146953	0.00010645
112	1	153410810	154685545	1655	184	6.79903e-05	0.000946609	1655	184	0.0190007	1.50192e-05
113	1	154685546	156813845	2336	289	0.000102801	8.92326e-05	2336	289	0.0106082	0.00153852
114	1	156813846	158081627	2809	254	7.82561e-05	0.00100144	2809	254	0.0320671	3.41272e-10
115	1	158081628	158900369	1912	149	4.15498e-05	0.0147844	1912	149	0.012494	0.000915547
116	1	158900370	159882515	1512	167	4.72741e-05	0.00986016	1512	167	0.00953329	0.00401823
117	1	159882516	161054076	1993	251	6.34478e-05	0.00512925	1993	251	0.00310751	0.105888
118	1	161054077	161945442	1538	153	7.20078e-05	0.000221312	1538	153	0.0084074	0.011625
119	1	161945443	163141862	2513	258	0.000104406	3.48591e-05	2513	258	0.0492291	1.5988e-21
120	1	163141863	163854567	1469	118	4.50888e-05	0.00498405
121	1	163854568	164726579	1440	157	9.98609e-06	0.279783	1440	157	0.00128284	0.230402
122	1	164726580	165553812	1782	222	1.60149e-05	0.222397	1782	222	0.0160234	8.74538e-05
123	1	165553813	166458031	1528	194	7.1393e-05	0.000747287	1528	194	0.0106644	0.00182636
124	1	166458032	167163954	1772	150	5.54431e-05	0.00246478	1772	150	0.00933296	0.00672719
125	1	167163955	168179086	1724	222	4.97701e-05	0.0151478	1724	222	0.0197813	1.41062e-05
126	1	168179087	169521551	2929	240	7.26058e-05	0.00156202	2929	240	0.0208052	1.11999e-05
127	1	169521552	170193207	1840	96	9.77599e-06	0.237417	1840	96	0.0100622	0.0012839
128	1	170193208	171044255	1744	138	2.75116e-05	0.0609431	1744	138	0.0160689	7.26465e-05
129	1	171044256	172465153	2984	199	7.99642e-05	0.000252582	2984	199	0.00296424	0.109761
130	1	172465154	173582511	1675	202	3.63605e-05	0.0454119	1675	202	0.020972	8.21874e-06
131	1	173582512	175385220	2653	120	1.70387e-05	0.143536	2653	120	0	0.362003
132	1	175385221	176449096	1412	145	1.94288e-05	0.135215
133	1	176449097	177746472	2100	174	5.06563e-05	0.00733145	2100	174	0.0037212	0.117152
134	1	177746473	178915113	2033	156	4.63351e-05	0.00926007	2033	156	0.018113	3.08975e-06
135	1	178915114	180221608					3250	176	0.00797871	0.00949374
136	1	180221609	181324205	2020	181	8.55415e-05	6.40832e-05	2020	181	0.029102	7.79653e-10
137	1	181324206	182420540	2234	221	8.01608e-05	0.000414717	2234	221	0.0176384	2.37422e-05
138	1	182420541	183920616	2654	204	5.23034e-05	0.00942096	2654	204	0.00865687	0.00825728
139	1	183920617	184953089	1662	175	2.08158e-05	0.140137	1662	175	0.00243166	0.149035
140	1	184953090	186179447	1341	152	1.5174e-05	0.194197	1341	152	0.00106284	0.262302
141	1	186179448	187072605	1648	116	2.06587e-05	0.0991338	1648	116	0.00169932	0.22371
142	1	187072606	187757076					1679	140	0.00523426	0.0573084
143	1	187757077	188625772					2337	104	0.00122839	0.259684
144	1	188625773	189904637					1355	33	0.00162124	0.163784
145	1	189904638	191419275	2773	127	1.07626e-05	0.246397	2773	127	0.00539183	0.0428919
146	1	191419276	192468373	1788	120	2.88336e-05	0.0432254	1788	120	0	0.41014
147	1	192468374	193575516	1386	122	7.32698e-06	0.309106	1386	122	0.00842333	0.00833827
149	1	194365689	195161235	2117	82	2.41551e-06	0.403793	2117	82	0.00445499	0.0632364
150	1	195161236	196179110					2116	162	0.0187015	4.97876e-06
151	1	196179111	197935821	1512	110	8.77578e-06	0.270556	1512	110	0.00469608	0.0700442
152	1	197935822	199263389					1930	151	0.0140822	0.000274037
153	1	199263390	200134005					1772	129	0.00653935	0.0308606
154	1	200134006	201067952	1814	176	4.6426e-05	0.0124256	1814	176	0.00810337	0.0072455
155	1	201067953	202583884	2902	320	3.18317e-05	0.111203	2902	320	0.0349849	1.22344e-10
156	1	202583885	204092537	2610	283	0.000130933	1.37737e-06	2610	283	0.0244895	8.98779e-07	-0.415129	0.0228459	0
157	1	204092538	205009623	1397	208	0.000108303	4.0032e-06	1397	208	0.0283639	9.38058e-10	-0.059767	0.729387	0
158	1	205009624	205917548	1859	218	3.94014e-05	0.039114	1859	218	0.0317909	3.64957e-10
159	1	205917549	208162951	2707	248	6.96754e-05	0.00248553	2707	248	0.0344103	4.65033e-13
160	1	208162952	209711169	2706	318	0.00010577	0.00010834	2706	318	0.036644	6.89111e-15
161	1	209711170	211082892	2462	230	3.442e-05	0.0645044	2462	230	0.0269303	4.0472e-08
162	1	211082893	212347582	3075	208	3.58909e-05	0.0495383	3075	208	0.0304223	2.33752e-10
163	1	212347583	213958292	3126	264	9.19135e-05	0.000219643	3126	264	0.0233379	5.50055e-07
164	1	213958293	214783872	1313	163	9.85393e-05	3.30987e-06	1313	163	0.0343892	8.24842e-13	-0.124865	0.451349	0
165	1	214783873	215825791	851	81	4.4778e-05	0.00151708	851	81	0.00363366	0.101898
166	1	215825792	216658126	1549	176	4.62976e-05	0.0126147	1549	176	0.00690416	0.0300618
167	1	216658127	217352165	1711	208	4.8386e-05	0.0150031	1711	208	0.0239081	9.77849e-07
168	1	217352166	218563960					3056	234	0.0190787	7.77391e-06
169	1	218563961	220073132	2914	208	6.24638e-06	0.364972	2914	208	0.0173966	1.28722e-05
170	1	220073133	220978151	1633	153	9.77006e-06	0.281097
171	1	220978152	221856864					1873	157	0.0168574	4.2281e-05
172	1	221856865	222763597	1544	181	7.26523e-06	0.338831	1544	181	0.00735694	0.0222699
173	1	222763598	223654902	1662	168	1.94242e-05	0.151002	1662	168	0.0199615	8.12673e-06
174	1	223654903	224943337	2039	195	3.5936e-05	0.0446687	2039	195	0.010029	0.00661381
175	1	224943338	226534711	2936	222	1.97142e-05	0.177674	2936	222	0.0055056	0.0429485
176	1	226534712	228045554					3477	215	0.0191415	1.11833e-05
177	1	228045555	229075156	1639	174	6.31007e-05	0.00148213	1639	174	0.0159439	9.25959e-05
178	1	229075157	230227247	1348	214	0.000110638	3.36429e-06	1348	214	0.0126707	0.00132667
179	1	230227248	231287764	2877	278	9.12328e-05	0.000313534	2877	278	0.0155567	5.41012e-05
180	1	231287765	232177704					1677	210	0.0102186	0.00567368
181	1	232177705	232954942	1828	240	1.49981e-05	0.243432	1828	240	0.0147572	0.000156615
182	1	232954943	233639473	1609	156	4.45875e-05	0.0114527	1609	156	0.012663	0.00106113
183	1	233639474	234365796	1434	168	1.39803e-05	0.222108	1434	168	0.0145885	0.000233563
184	1	234365797	235097113	1693	255	6.27844e-05	0.00578828	1693	255	0.0340546	2.29474e-11
185	1	235097114	236199671					1643	164	0.00683727	0.0270587
186	1	236199672	237409458	2739	240	0.000132519	2.2869e-07	2739	240	0.0358655	2.56939e-11	-0.414845	0.00816164	0
187	1	237409459	238094455	1689	214	5.57752e-05	0.00732832	1689	214	0.0245528	1.62653e-07
188	1	238094456	238704857	1623	133	2.85589e-05	0.0518801	1623	133	0.00635223	0.0221924
189	1	238704858	239332148					1836	166	0.00862416	0.0106985
190	1	239332149	240248508	2006	231	1.7528e-05	0.207455	2006	231	0.018515	8.19698e-06
191	1	240248509	241033584	1705	247	6.83478e-05	0.00284649	1705	247	0.00246015	0.103179
192	1	241033585	241813534	1781	248	0.000150107	1.44431e-08	1781	248	0.0159383	0.000164583
193	1	241813535	242417923	1589	197	2.12977e-05	0.147753	1589	197	0.00944086	0.0081419
194	1	242417924	243048003	1604	178	1.99722e-05	0.15115	1604	178	0.020469	1.57634e-06
195	1	243048004	244723196	2128	239	3.03177e-05	0.0920351	2128	239	0.00930827	0.00744892
196	1	244723197	245970505	2378	299	4.62234e-05	0.0378115	2378	299	0.020347	4.68674e-07
197	1	245970506	246610290	720	85	1.62923e-05	0.116935	720	85	0.00555621	0.0341147
198	1	246610291	247531112	2242	212	2.15005e-05	0.153799	2242	212	0.0181012	5.95779e-05
199	1	247531113	248341594	1988	197	2.28185e-05	0.132815	1988	197	0.0135957	0.000769695
200	1	248341595	249240538	832	33	2.87597e-06	0.337871	832	33	0.000751872	0.296355
201	2	10181	789195	1552	175	4.7014e-05	0.0114939	1552	175	0.0137243	0.000617436
202	2	789196	1376545					1824	131	0.00482959	0.0532117
203	2	1376546	1875060	1428	181	2.15972e-05	0.13571	1428	181	0	0.336488
204	2	1875061	2680063	1764	220	9.06879e-06	0.32188	1764	220	0.0294065	7.15164e-10
205	2	2680064	3314202	1634	239	5.97459e-05	0.00659714	1634	239	0.0116696	0.00229438
206	2	3314203	4016104	1773	219	2.6407e-05	0.112047	1773	219	0.0242553	1.61407e-07
207	2	4016105	4766969	1589	155	2.92703e-06	0.414981	1589	155	0.0132885	0.000913189
208	2	4766970	5568653	1354	140	5.85968e-05	0.00120434	1354	140	0.00843937	0.0131748
209	2	5568654	6306606	1902	218	1.05711e-05	0.297238	1902	218	0.0151939	3.78911e-05
210	2	6306607	7108208	1710	203	1.2211e-05	0.266391	1710	203	0.0109326	0.00427927
211	2	7108209	7966709	1387	142	3.83756e-05	0.0193849	1387	142	0.00332738	0.139715
212	2	7966710	8978798	1154	185	2.94179e-05	0.0740319	1154	185	0.0194184	1.48681e-05
213	2	8978799	9960670	1654	198	8.79558e-06	0.318474	1654	198	0.019868	1.00624e-05
214	2	9960671	10611654	2015	238	1.59288e-05	0.230659	2015	238	0.0441503	7.54919e-16
215	2	10611655	11230349	1838	228	2.62797e-05	0.117262	1838	228	0.0157353	0.000320744
216	2	11230350	11995765	1492	199	8.82276e-05	7.44986e-05	1492	199	0.0151923	0.000430188
217	2	11995766	12732506	1804	246	4.56339e-05	0.0278981	1804	246	0.0105554	0.00334383
218	2	12732507	13625450	1682	114	1.06267e-06	0.449505	1682	114	0.0078596	0.0120199
219	2	13625451	14692120	1221	109	4.6177e-05	0.00331102	1221	109	0.0045038	0.0681633
220	2	14692121	15721703	1378	127	2.89882e-05	0.0462558	1378	127	0.0136369	0.000424583
221	2	15721704	17241115	2137	263	9.91052e-06	0.321957	2137	263	0.0164072	4.12623e-05
222	2	17241116	18656325	3081	227	8.36342e-05	0.000298218	3081	227	0.0120642	0.00130303
223	2	18656326	20064517	3101	261	3.31723e-05	0.0826203	3101	261	0.0171083	0.000151603
224	2	20064518	21084898	2266	265	6.48356e-05	0.00526642	2266	265	0.040659	4.57793e-15
225	2	21084899	22429640	1561	151	3.75817e-06	0.396885	1561	151	0.00597252	0.0303133
226	2	22429641	23538527	2003	215	5.44498e-05	0.00854181	2003	215	0.0312395	1.4883e-09
227	2	23538528	24669224	2321	189	6.22342e-05	0.00227389	2321	189	0.0205765	2.20434e-06
228	2	24669225	25895394	1875	198	3.52332e-05	0.0487493	1875	198	0.0209351	9.2787e-07
229	2	25895395	26894102					1571	193	0.00821126	0.00826677
230	2	26894103	28819510	2605	234	0.000123374	8.67332e-07	2605	234	0.0371177	5.35642e-15	0.00352747	0.981253	0
231	2	28819511	29627932	1762	204	5.03479e-07	0.468255	1762	204	0.0179016	1.42468e-05
232	2	29627933	30575619	1871	225	0.000101333	2.17999e-05	1871	225	0.0406339	3.35586e-14	-0.014214	0.931047	0
233	2	30575620	31457418	2109	196	2.53715e-05	0.109261	2109	196	0.00827987	0.0204629
234	2	31457419	33123604	2646	215	7.38209e-05	0.000848817	2646	215	0.0171962	2.18834e-05
235	2	33123605	33735318	1747	218	6.14688e-05	0.00408835	1747	218	0.0183499	1.43092e-05
236	2	33735319	34239776	1496	141	8.64092e-05	1.09083e-05	1496	141	0.00799342	0.0145667
237	2	34239777	34890558	1316	120	0	0.476478
238	2	34890559	35609257	542	69	1.78651e-05	0.0785806	542	69	0.00230039	0.116188
239	2	35609258	36120743	1668	105	6.35215e-06	0.318637
240	2	36120744	36867389	1825	202	0.000134064	2.90654e-08	1825	202	0.0164533	5.7438e-05
241	2	36867390	37603360	1711	186	7.9594e-05	0.000188414	1711	186	0.0282687	5.20664e-09
242	2	37603361	38887393	2823	261	4.69689e-05	0.0277765	2823	261	0.00919162	0.00901067
243	2	38887394	40087418					1464	169	0.0075548	0.0106051
244	2	40087419	40786176					1311	188	0.010485	0.0031582
245	2	40786177	41540439	1352	111	3.83101e-05	0.0111332	1352	111	0.00644674	0.0299373
246	2	41540440	42307418	2224	187	2.6076e-05	0.0987885
247	2	42307419	43295776	2084	213	4.08129e-05	0.0330728	2084	213	0.0027953	0.0690591
248	2	43295777	44104110	1845	201	2.48142e-05	0.11663	1845	201	0.0107374	0.0035153
249	2	44104111	45189468	2169	231	3.77039e-05	0.0495421	2169	231	0.0225014	1.00019e-06
250	2	45189469	45850047	1722	245	8.42916e-05	0.000398983	1722	245	0.0181932	5.98758e-05
251	2	45850048	46499326	1825	298	0.000109067	4.72096e-05	1825	298	0.0309371	3.24237e-09
252	2	46499327	47320114	1979	249	4.63238e-05	0.026856	1979	249	0.0184975	1.76253e-05
253	2	47320115	48171058	1848	264	6.89556e-05	0.00337631	1848	264	0.0242291	1.16343e-07
254	2	48171059	49114132	2111	207	2.29361e-05	0.136737	2111	207	0.0229783	1.6306e-06
255	2	49114133	49849185	1935	188	5.07051e-06	0.380836	1935	188	0.00326001	0.14849
256	2	49849186	50756240					2060	183	0.0132745	0.000244989
257	2	50756241	51669493	1911	182	5.65691e-05	0.0040842	1911	182	0.00529273	0.0395976
258	2	51669494	52494111	1733	185	1.37209e-05	0.235613	1733	185	0.019404	5.1305e-06
259	2	52494112	53032976	1493	108	2.52067e-05	0.056061	1493	108	0.0100153	0.00278304
260	2	53032977	53852120					2186	202	0.00877851	0.0130495
261	2	53852121	54688234	1676	152	3.8329e-05	0.0223593	1676	152	0.00862927	0.00835495
262	2	54688235	55663336					2087	194	0.00792467	0.0128416
263	2	55663337	56394698	1783	161	1.06404e-05	0.270823	1783	161	0.00133766	0.205252
264	2	56394699	57433653	2197	188	1.75383e-06	0.443547	2197	188	0.00413995	0.0806144
265	2	57433654	57952945					1477	112	0.00946682	0.00353557
266	2	57952946	59251996	2018	215	2.99003e-05	0.0845662	2018	215	0.00390184	0.0634589
267	2	59251997	60775066	2969	291	2.76952e-05	0.131702	2969	291	0.0164913	2.0802e-05
268	2	60775067	62429910	2408	222	9.14232e-06	0.321446	2408	222	0.0116238	0.00252313
269	2	62429911	63672118	1823	196	8.05775e-06	0.330407	1823	196	0.0167261	0.000109245
270	2	63672119	64696089					1806	160	0.00237054	0.173491
271	2	64696090	65938002	2359	255	6.14388e-05	0.00667329	2359	255	0.0144706	0.000237227
272	2	65938003	67224027	2343	222	8.74611e-05	0.000155949	2343	222	0.00199348	0.135628
273	2	67224028	67979828	1993	191	0.000141504	3.46899e-09	1993	191	0.00834548	0.0115391
274	2	67979829	68877774	1896	189	7.04176e-05	0.000761456	1896	189	0.0142078	0.000350844
275	2	68877775	70756283	2808	252	0.000103127	3.57643e-05	2808	252	0.0261944	3.24863e-08
276	2	70756284	71385813	1741	205	0.000123419	2.50141e-07	1741	205	0.0161218	0.000107779
277	2	71385814	72160302	1681	210	3.26259e-07	0.472115	1681	210	0.0340266	2.45864e-11
278	2	72160303	73544290	1256	137	1.96892e-05	0.126284	1256	137	0.00393035	0.0970719
279	2	73544291	75148103	1563	178	1.15637e-05	0.264696	1563	178	0.0304172	1.83005e-10
280	2	75148104	75942397	1917	219	4.73448e-05	0.0186885	1917	219	0.0138203	0.00026151
281	2	75942398	76649030	1782	133	1.56979e-05	0.172609	1782	133	0.00891516	0.00651597
282	2	76649031	77372830	1704	163	2.45214e-05	0.0976765	1704	163	0.0115021	0.00165476
283	2	77372831	78080057					1547	184	0	0.431933
284	2	78080058	79019676					1821	140	0.0183225	1.70966e-06
285	2	79019677	79900055	2189	220	2.81333e-05	0.0991844	2189	220	0.0254344	7.93369e-08
286	2	79900056	80737811	1488	247	8.32042e-05	0.000478396	1488	247	0.0379181	1.20672e-13
287	2	80737812	81623357					1548	119	0.00585989	0.0364362
288	2	81623358	82941455	3097	95	2.27677e-05	0.0628415	3097	95	0.00171104	0.213798
289	2	82941456	84395899					2289	94	0.00195448	0.229434
290	2	84395900	85992794	2874	247	1.33429e-05	0.268213	2874	247	0.0172797	0.000175967
292	2	86867033	88547312					597	91	0.00602893	0.0257814
294	2	91860962	97339301	552	57	3.80001e-05	0.00167086	552	57	0.00313034	0.111866
295	2	97339302	98989360	1191	93	4.38383e-05	0.00287683	1191	93	0.00703947	0.0151974
296	2	98989361	100202436	1777	120	1.21987e-05	0.215377	1777	120	0.00886965	0.00448176
297	2	100202437	101556799	2443	175	1.15694e-05	0.262979	2443	175	0.0171298	1.68738e-05
298	2	101556800	102494487	1687	175	1.3479e-05	0.23373	1687	175	0.0185056	1.57384e-05
299	2	102494488	103305257					1864	132	0.0132413	0.000308676
300	2	103305258	105120578	2063	197	4.48411e-05	0.0191526	2063	197	0.0322456	7.76363e-11
301	2	105120579	106546524	3231	280	5.24625e-05	0.0199399	3231	280	0.0290711	5.1919e-09
302	2	106546525	107412295	2079	194	4.69849e-05	0.0147732	2079	194	0.018052	3.33615e-05
303	2	107412296	108417773					1639	122	0.00462753	0.0759242
304	2	108417774	110097868	2807	205	5.88112e-05	0.00455539	2807	205	0.0147575	0.000328033
305	2	110097869	112644828	2243	224	6.84499e-05	0.0019679	2243	224	0.0143516	0.000213052
306	2	112644829	113930668	2352	193	0	0.48414	2352	193	0.018087	9.37278e-06
307	2	113930669	115203835	1932	173	3.94385e-05	0.0257279	1932	173	0.00388308	0.080465
308	2	115203836	116415816					2004	178	0.0135198	0.000519601
309	2	116415817	117822516					2231	131	0.00794384	0.00711104
310	2	117822517	118663653	1618	120	4.37912e-05	0.00632136	1618	120	0.00355362	0.114796
311	2	118663654	119635489	2107	191	3.58191e-05	0.0436716	2107	191	0.0125978	0.001697
312	2	119635490	121073752	2731	231	3.96829e-05	0.0419277	2731	231	0.0210218	2.38295e-06
313	2	121073753	122026817	1476	221	9.48503e-05	5.21191e-05	1476	221	0.0153322	0.000182856
314	2	122026818	123219243	1106	119	2.23666e-05	0.0858053	1106	119	0.00721118	0.0187104
315	2	123219244	123929872					1268	76	0.00192133	0.226069
316	2	123929873	124730991	1717	92	5.37563e-08	0.472968	1717	92	0.00912871	0.000279507
317	2	124730992	125741528	2251	200	3.98482e-05	0.0323595	2251	200	0.00608314	0.0497555
318	2	125741529	126754027	2027	121	1.10494e-05	0.236412	2027	121	0.000266598	0.369247
319	2	126754028	127895644					2834	212	0.0180199	7.59813e-05
320	2	127895645	129486897	3045	245	0.000103778	2.72038e-05	3045	245	0.0290323	1.48378e-09
321	2	129486898	130485398	1875	153	2.54612e-05	0.0838896	1875	153	0.0189009	2.52783e-06
322	2	130485399	131760638	846	90	7.48737e-06	0.280194
323	2	131760639	132598285	902	54	1.44223e-05	0.0970215	902	54	0.00514958	0.0123298
324	2	132598286	133352950	459	59	1.50074e-05	0.0975118	459	59	0.000444722	0.376074
325	2	133352951	134359059	1846	228	5.65364e-05	0.00807629	1846	228	0.000988127	0.223854
326	2	134359060	135160197	1534	189	5.53845e-05	0.00532153	1534	189	0.0116741	0.00239302
327	2	135160198	137061003	982	106	3.00044e-05	0.030489	982	106	0.0027065	0.138951
328	2	137061004	138073791					2252	142	0.00554593	0.0535508
329	2	138073792	139505819	2328	180	1.95508e-05	0.156957	2328	180	0.010377	0.00249573
330	2	139505820	140934531	3366	194	8.18899e-05	0.000167275	3366	194	0.00469614	0.0576558
331	2	140934532	141802664	2597	156	2.035e-05	0.132881
332	2	141802665	142494980	2214	133	4.20493e-05	0.0105636	2214	133	0.00706731	0.0183138
333	2	142494981	143259780	1820	164	1.79345e-05	0.165941	1820	164	0.00548133	0.0578999
334	2	143259781	144503688	1785	174	5.21512e-05	0.00614897	1785	174	0.00950999	0.00564764
335	2	144503689	145977920	1113	194	7.38536e-05	0.000532585	1113	194	0.0035088	0.0960244
336	2	145977921	147252196	1572	154	6.45888e-05	0.000724558	1572	154	0.00241827	0.176807
337	2	147252197	149568875	2549	148	9.42022e-06	0.284585	2549	148	0.00754541	0.0161601
338	2	149568876	151428988	2936	265	8.97399e-05	0.000296013	2936	265	0.0148203	0.000490854
339	2	151428989	152497375	2271	185	1.20794e-05	0.260318	2271	185	0.00620935	0.0256437
340	2	152497376	153999309	2612	190	8.98392e-06	0.312594	2612	190	0.00900934	0.00926907
341	2	153999310	155207969	2495	193	3.20288e-06	0.416948	2495	193	0.000287374	0.293914
342	2	155207970	156130947	1810	161	9.31343e-06	0.293665	1810	161	0.00481344	0.0589772
343	2	156130948	157556096	2319	190	7.99313e-06	0.329344	2319	190	0.00486099	0.0666095
344	2	157556097	159040979	1187	178	6.53477e-06	0.350881	1187	178	0.00215123	0.176458
345	2	159040980	160200379	2621	199	7.48136e-05	0.000524399	2621	199	0.0158412	0.00033048
346	2	160200380	161432089	2527	161	7.95592e-05	8.42046e-05	2527	161	0.00233313	0.161559
347	2	161432090	163607635	2759	182	3.62753e-05	0.0386488	2759	182	0.00880772	0.0122173
348	2	163607636	164702312	1097	132	2.57085e-05	0.0690387	1097	132	0.0194981	1.55962e-06
349	2	164702313	165917788	1739	182	5.3447e-05	0.00597196	1739	182	0.0142181	0.00027835
350	2	165917789	167488576	2768	213	4.51206e-06	0.396241	2768	213	0.0105169	0.00152565
351	2	167488577	168437445	1142	65	8.00959e-06	0.237229	1142	65	0.0030488	0.115341
352	2	168437446	169224445	1212	166	4.96518e-06	0.376753	1212	166	0.00548769	0.0532421
353	2	169224446	170155561	1750	214	0.000114618	1.73207e-06	1750	214	0.0100118	0.00727887
354	2	170155562	170865765	1794	108	4.31677e-05	0.00510959	1794	108	0.00751586	0.00990138
355	2	170865766	171566482	1733	227	6.82201e-05	0.00212363	1733	227	0.0208885	7.86137e-06
356	2	171566483	172501315	1622	151	1.26414e-05	0.231787	1622	151	0.011353	0.000709405
357	2	172501316	173287857	1621	180	3.40234e-05	0.0471663	1621	180	0.0151272	1.01081e-05
358	2	173287858	174118389	1766	181	2.94553e-05	0.0718436	1766	181	0.0211529	3.82476e-06
359	2	174118390	174927563	1488	232	0.000144002	2.04437e-08	1488	232	0.0344749	1.0568e-10	-0.275029	0.0736655	0
360	2	174927564	176734750	3156	251	3.71635e-05	0.0584001	3156	251	0.0208645	1.54095e-06
361	2	176734751	178149981	2645	274	6.16959e-05	0.00799478	2645	274	0.0186493	2.88028e-05
362	2	178149982	179224870	2356	116	5.6673e-05	0.000759698	2356	116	0.0079025	0.00951198
363	2	179224871	180336045	1897	202	0.000209156	2.00298e-15	1897	202	0.035496	8.43618e-14	-0.0494464	0.694093	0
364	2	180336046	181309939	2094	180	6.50349e-05	0.00130054	2094	180	0.0176611	2.26854e-05
365	2	181309940	182307877	2147	163	3.40016e-05	0.0403976
366	2	182307878	183352290	1854	160	8.52811e-05	3.12004e-05	1854	160	0.0097993	0.00593768
367	2	183352291	184148655	1639	116	6.90776e-05	8.41854e-05	1639	116	0.00486354	0.0408164
368	2	184148656	184866232					1453	106	0.00666248	0.0159872
369	2	184866233	186244920	1940	107	9.73806e-06	0.248657	1940	107	0.000756707	0.326674
370	2	186244921	187498047	2091	73	2.46746e-06	0.397427	2091	73	0.00288503	0.120352
371	2	187498048	188895310	2007	104	1.95399e-05	0.0996763
372	2	188895311	189882702					1623	78	0.00342971	0.111146
373	2	189882703	191051954	1297	102	1.74018e-05	0.121826
374	2	191051955	193033982					2819	243	0.00544982	0.0232955
375	2	193033983	195300250	1444	101	1.21572e-05	0.198173	1444	101	0.00491582	0.0675734
376	2	195300251	196446299	1510	110	1.53921e-05	0.156531	1510	110	0.0107854	0.000661215
377	2	196446300	198140350	2439	143	4.45985e-05	0.00914908	2439	143	0.00477599	0.0675803
378	2	198140351	199654969	1686	142	4.28107e-05	0.0112678	1686	142	0.00852753	0.00778596
379	2	199654970	201324132	1897	167	8.19711e-05	7.05673e-05	1897	167	0.0220111	1.3198e-06
380	2	201324133	202504862	1854	162	4.64429e-05	0.0100663	1854	162	0.00630902	0.0326254
381	2	202504863	203639686	1665	196	6.37514e-05	0.00213033	1665	196	0.0131985	0.000844024
382	2	203639687	205038119	2011	154	2.81381e-05	0.0661614	2011	154	0.00562262	0.0505531
383	2	205038120	206821199	2685	313	2.10427e-05	0.200218	2685	313	0.0212372	1.32648e-05
384	2	206821200	207726594	1747	174	2.88744e-05	0.0720069	1747	174	0.00798651	0.0123465
385	2	207726595	208674588	1674	220	1.28515e-05	0.264557	1674	220	0.0260794	5.90654e-08
386	2	208674589	209940230	2014	197	7.80745e-05	0.000317084	2014	197	0.0271537	2.11848e-08
387	2	209940231	210842457					1620	86	0.011382	0.000486938
388	2	210842458	212520453	2873	233	3.19938e-05	0.0789981	2873	233	0.00683066	0.0201297
389	2	212520454	213194362	1592	147	3.47211e-05	0.0314307	1592	147	0.00720439	0.0180678
390	2	213194363	214044566	1761	186	5.45386e-05	0.00558872	1761	186	0.016857	0.00012422
391	2	214044567	215002484	1855	100	7.69561e-07	0.454768
392	2	215002485	215899570	1665	157	1.29369e-05	0.230965	1665	157	0.012903	0.00117322
393	2	215899571	217566011	2806	293	5.83045e-05	0.0131368	2806	293	0.0244859	6.06209e-08
394	2	217566012	218396258	1641	163	3.42893e-05	0.0392408	1641	163	0.0146623	0.000100404
395	2	218396259	219678783	1726	175	2.62817e-05	0.0905254	1726	175	0.0154938	0.000326832
396	2	219678784	220771552	1089	147	3.69977e-05	0.0243917	1089	147	0.0283301	2.79275e-10
397	2	220771553	221445191	1613	146	1.46541e-05	0.197504	1613	146	0.00328167	0.11867
398	2	221445192	222327713	1617	179	6.05443e-05	0.00232589	1617	179	0.00746122	0.0216826
399	2	222327714	223353965	1582	191	2.34693e-05	0.12317	1582	191	0.00958047	0.00912609
400	2	223353966	224123079	1916	150	3.56316e-05	0.0295448	1916	150	0.00842558	0.00682819
401	2	224123080	224938731	1258	153	3.58756e-05	0.0298018	1258	153	0.0328082	1.43315e-11
404	2	227557842	228812485	2744	212	1.05001e-05	0.296608	2744	212	0.00962302	0.00601223
405	2	228812486	229764918					1877	153	0.0128477	0.00096737
406	2	229764919	230541092	1888	207	6.25943e-05	0.00299859	1888	207	0.0152186	0.000210675
407	2	230541093	231847386	2828	255	7.9308e-05	0.000896033	2828	255	0.0158207	0.000226664
409	2	233352723	234115092					1644	191	0.00295198	0.139866
410	2	234115093	234945577					1772	206	0.00644722	0.034291
411	2	234945578	235625789					2007	231	0.0229301	1.19597e-06
412	2	235625790	236276287	1642	217	1.46018e-05	0.239045	1642	217	0.021712	1.9347e-06
413	2	236276288	237194297					1612	180	0.00999443	0.00693275
414	2	237194298	238185482					1560	181	0.00111952	0.244667
415	2	238185483	238814630	1481	169	4.45982e-05	0.0138473	1481	169	0.0148188	0.00011704
416	2	238814631	239634350	2060	189	2.77313e-05	0.087451	2060	189	0.00577925	0.0543426
417	2	239634351	240325600	1509	223	3.77856e-07	0.471183	1509	223	0.0134806	0.000639311
418	2	240325601	241113279	2174	255	6.8778e-05	0.00304123	2174	255	0.028516	2.59002e-09
419	2	241113280	241910366	2398	247	2.72906e-05	0.117687	2398	247	0.0137976	0.000806015
420	2	241910367	243188366	1290	166	7.45369e-06	0.329504	1290	166	0.00656239	0.0189101
421	3	60197	795746	1453	219	2.85062e-05	0.0961295	1453	219	0.0290791	2.65091e-09
422	3	795747	1440048	1694	242	6.46278e-05	0.00401735	1694	242	0.021904	1.32585e-06
423	3	1440049	2140011	2490	243	1.68571e-07	0.475128	2490	243	0.00670778	0.0157172
424	3	2140012	3128152	2659	324	6.02455e-05	0.014125	2659	324	0.0246998	1.05712e-07
425	3	3128153	4109393					2286	247	0.0343313	1.37049e-10
426	3	4109394	4835083	1629	239	5.67329e-06	0.381893	1629	239	0.0196459	3.58677e-05
427	3	4835084	5496182	1466	262	2.38203e-05	0.1536	1466	262	0.0162976	4.04599e-05
428	3	5496183	6421145	2622	249	7.07207e-05	0.00224617	2622	249	0.00637171	0.0394554
429	3	6421146	7529554	2399	232	6.17751e-05	0.00479537	2399	232	0.00853079	0.0083563
430	3	7529555	8664892	2989	237	7.45016e-05	0.00117826	2989	237	0.0236015	9.31466e-07
431	3	8664893	9970731	2660	331	1.84179e-05	0.233765	2660	331	0.0207465	1.53458e-08
432	3	9970732	11226367	2632	298	1.42604e-05	0.272762
433	3	11226368	11997658	1575	205	8.41922e-05	0.00016115	1575	205	0.0115672	0.00183805
434	3	11997659	12859209	1680	141	0.000100327	7.26561e-07	1680	141	0.00662524	0.0220056
435	3	12859210	14312007	3284	324	0.000336888	1.06665e-23	3284	324	0.0393022	2.75548e-14	-0.542793	7.56797e-07	1	SLC6A6	DCM_GWAS,DCM_MTAG,CC_GWAS,CC_MTAG,HCM_MTAG,HCM_GWAS
436	3	14312008	15150876	1983	257	0.000253791	8.19121e-18	1983	257	0.0362271	8.68664e-12	-0.391194	0.00165116	0
437	3	15150877	16084005	1541	171	8.61289e-05	4.09531e-05	1541	171	0.0258731	2.1882e-08
438	3	16084006	17182494	2756	255	0.000135216	2.62343e-07	2756	255	0.0220457	6.64982e-06	-0.299178	0.107659	0
439	3	17182495	19030988	2554	185	9.59826e-05	1.32994e-05	2554	185	0.016782	0.000117622
440	3	19030989	20754842	3103	217	2.09879e-05	0.161478	3103	217	0	0.286363
441	3	20754843	21790867	2783	254	5.76503e-05	0.00964113	2783	254	0.0309575	1.80628e-12
442	3	21790868	22648001	2652	223	4.76175e-05	0.0189947	2652	223	0.00450735	0.0625311
443	3	22648002	23426044	1264	100	3.01013e-05	0.0271433	1264	100	0.0107987	0.000769577
444	3	23426045	24270189	1530	191	4.90275e-05	0.0113927	1530	191	0.015851	0.000175711
445	3	24270190	25516193	3234	294	5.38703e-05	0.0195938	3234	294	0.022168	2.14355e-07
446	3	25516194	26905340					2093	178	0.00925858	0.00817384
447	3	26905341	27614908					1555	95	0.00675099	0.0189824
448	3	27614909	28649810	1769	181	7.17292e-06	0.340629	1769	181	0.0122655	0.00174769
449	3	28649811	29877022	3207	287	1.61748e-05	0.245628	3207	287	0.0158231	0.000207067
450	3	29877023	31269697	2905	256	5.95727e-05	0.0081498	2905	256	0.0295262	4.84697e-09
451	3	31269698	32378805	1875	250	9.67774e-05	8.36551e-05	1875	250	0.0381357	3.36675e-13
452	3	32378806	33020868	1353	167	5.63829e-05	0.00315582
453	3	33020869	33991869					1763	151	0.0152242	4.54618e-05
454	3	33991870	35009559	2111	167	3.68911e-05	0.0313874	2111	167	0.00467025	0.0796395
455	3	35009560	35913033	1675	152	5.39743e-05	0.00317338	1675	152	0.0107252	0.00195577
456	3	35913034	36840136	2002	182	3.50802e-05	0.0434261	2002	182	0.0136884	0.00106426
457	3	36840137	38729767	3185	272	3.27086e-05	0.089216	3185	272	0.0176633	2.7151e-05
458	3	38729768	39605996	1945	146	6.69934e-05	0.000391056	1945	146	0.0124772	0.00123043
459	3	39605997	40897627					1655	113	0.0167379	4.71454e-07
460	3	40897628	42301657	2398	188	5.13488e-06	0.379182	2398	188	0.00078452	0.267857
461	3	42301658	44141693	3032	279	7.97136e-05	0.00125412	3032	279	0.0427023	3.07758e-15
462	3	44141694	45844191	3083	248	9.54737e-06	0.32301	3083	248	0.0102746	0.00415603
463	3	45844192	47588461	2655	172	7.48921e-05	0.000254411	2655	172	0.00476271	0.0408515
464	3	47588462	50387742	2286	131	5.20836e-05	0.00248425	2286	131	0.017079	9.97363e-06
465	3	50387743	51953968	1190	70	7.15843e-05	2.01676e-06	1190	70	0.00724451	0.0066542
466	3	51953969	54074844	2951	257	0.00026108	1.44645e-18	2951	257	0.0442511	4.08537e-17	-0.41316	0.000241189	1	TKT	HCM_MTAG,DCM_MTAG,CC_MTAG,CC_GWAS,DCM_GWAS
467	3	54074845	54892586	1732	234	7.64135e-05	0.000882817	1732	234	0.046788	3.9946e-17
468	3	54892587	55616625	1710	234	4.02232e-05	0.0409099	1710	234	0.0159387	3.57245e-05
469	3	55616626	56954878	2599	194	5.52001e-06	0.37428
470	3	56954879	58557718	3116	190	2.2057e-05	0.136264	3116	190	0.00856511	0.0125694
471	3	58557719	59998583	2746	272	0.000109947	2.27284e-05	2746	272	0.0209899	1.06668e-05	0.408865	0.04579	0
472	3	59998584	60571139	1687	219	6.68489e-05	0.00219792	1687	219	0.0107805	0.0037775
473	3	60571140	61277587	1671	185	6.17576e-05	0.00223452	1671	185	0.00316442	0.111973
474	3	61277588	62609818	2460	310	1.94578e-05	0.215495	2460	310	0.0240171	1.85106e-07
475	3	62609819	63670803	2499	230	6.9041e-05	0.00202777	2499	230	0.01098	0.00353416
476	3	63670804	64662373					1470	218	0.0279139	6.57652e-09
477	3	64662374	65326751	1797	211	1.53227e-05	0.226157	1797	211	0.00978283	0.00141804
478	3	65326752	66702084	2554	276	6.78412e-05	0.00437848	2554	276	0.020752	1.3388e-06
479	3	66702085	67454740					1726	166	0.00100137	0.295709
480	3	67454741	68319770					1612	164	0.0185896	1.45979e-05
481	3	68319771	69784969	3344	262	2.51315e-05	0.1418	3344	262	0.0163126	3.33196e-05
482	3	69784970	71223281	1870	218	6.63758e-05	0.00228751	1870	218	0.00750329	0.0175278
483	3	71223282	72334704	2268	311	0	0.483631	2268	311	0.000763243	0.0670471
484	3	72334705	73606612	2122	273	4.86007e-05	0.0263749	2122	273	0.0238081	6.13647e-08
485	3	73606613	74383137	1812	214	1.14575e-05	0.282798	1812	214	0.0203836	1.88392e-06
486	3	74383138	75374967					1492	97	0.00221611	0.203085
487	3	75374968	76157470	368	33	3.89908e-06	0.297661	368	33	0.00306688	0.0718149
488	3	76157471	77507832	2514	210	4.88213e-05	0.014688	2514	210	0.011338	0.00367541
489	3	77507833	79023360					2659	215	0.018644	1.57407e-05
490	3	79023361	80385708	1741	104	9.87795e-06	0.243279	1741	104	0.000689791	0.305572
491	3	80385709	81431496					1529	66	0.00572175	0.0223939
493	3	82532743	83529394	1915	105	1.19519e-05	0.205468	1915	105	0.0078734	0.0125919
494	3	83529395	84698480	2606	111	1.39832e-05	0.178331	2606	111	0.0107839	0.00132436
495	3	84698481	85807679	2114	129	3.54913e-05	0.0224926	2114	129	0.00950035	0.00275761
496	3	85807680	86660979	1463	99	2.94355e-06	0.397486	1463	99	0	0.434142
498	3	87411259	88375763	1696	106	1.98993e-05	0.0977226	1696	106	0.00406818	0.0761592
499	3	88375764	89612939	2245	114	1.685e-05	0.140526	2245	114	0.0036595	0.0886181
500	3	89612940	94250144	797	66	2.14138e-05	0.0454506	797	66	0.00627285	0.0152549
501	3	94250145	95088587	1511	71	3.67427e-06	0.360393	1511	71	0.00382124	0.0462176
503	3	96055533	97351955	1107	78	3.83921e-05	0.00422985	1107	78	0.000668957	0.279466
504	3	97351956	98212868	1975	135	2.01143e-05	0.120132	1975	135	0.00795523	0.0102491
505	3	98212869	99045104	1221	118	1.34116e-05	0.193836	1221	118	0.00523253	0.0459356
506	3	99045105	100552522					2127	140	0.00434317	0.0826036
507	3	100552523	101906989	2666	173	3.28203e-05	0.0497926	2666	173	0.018841	8.50929e-06
508	3	101906990	103450271					2802	124	0.0264496	1.5867e-10
509	3	103450272	104116563	1834	134	2.16713e-05	0.1036	1834	134	0.0156013	4.29993e-05
510	3	104116564	104878977	1893	129	8.94547e-06	0.28137	1893	129	0.00646288	0.0302353
511	3	104878978	106174685	2551	194	2.62877e-05	0.100719	2551	194	0.0171796	5.54421e-05
512	3	106174686	107736519	2639	244	0.000113567	5.87968e-06	2639	244	0.0188052	2.32398e-05
513	3	107736520	108638900	1719	142	5.52847e-06	0.356862	1719	142	0.000851861	0.233616
514	3	108638901	109519606	1631	122	6.06656e-06	0.335828	1631	122	0	0.400645
515	3	109519607	110935508	1696	99	4.80722e-06	0.350797	1696	99	0.00486291	0.0595576
516	3	110935509	111693782	1702	138	1.98397e-05	0.125437	1702	138	0.0166689	2.76683e-05
517	3	111693783	112408513	1634	149	4.37294e-05	0.0113298	1634	149	0.0132425	0.00045189
518	3	112408514	113657665	2774	209	6.23108e-05	0.00321396	2774	209	0.0118567	0.00277777
519	3	113657666	115649909	2369	271	4.27735e-05	0.0420379	2369	271	0.0139302	6.3417e-05
520	3	115649910	116498570	1590	146	2.13101e-05	0.115966	1590	146	0.00700629	0.0275006
521	3	116498571	117241644	1429	193	0.00010096	7.81751e-06	1429	193	0.0132394	0.00107764
522	3	117241645	118086929	1662	116	1.93511e-05	0.112733	1662	116	0.00995588	0.00215089
523	3	118086930	118903053	1644	137	2.49991e-06	0.420279	1644	137	0.0170027	2.15644e-05
524	3	118903054	119759983	1739	167	2.14324e-05	0.128733	1739	167	0.0079379	0.0144655
525	3	119759984	120574477	1544	154	0	0.480795	1544	154	0.00942915	0.00664845
526	3	120574478	121362442	1586	73	1.63906e-05	0.100529	1586	73	0.00167806	0.222127
527	3	121362443	122340832	2042	152	5.81429e-05	0.00176894	2042	152	0.0077117	0.0147812
528	3	122340833	123518507	1868	169	5.2881e-05	0.00514283	1868	169	0.012111	0.00161052
529	3	123518508	124823006					2488	213	0.00570805	0.0320915
531	3	125475723	125992650	1478	79	2.40223e-05	0.0412378	1478	79	0	0.454404
532	3	125992651	127495173	3321	269	8.28681e-05	0.000742545	3321	269	0.0100762	0.00636897
533	3	127495174	129091975	2502	209	7.74345e-05	0.000461852	2502	209	0.0118539	0.000794005
534	3	129091976	130242360	1566	130	5.3438e-05	0.00199322	1566	130	0	0.37267
535	3	130242361	131373470	1301	116	1.87467e-05	0.119367	1301	116	0.0105156	0.0015084
536	3	131373471	132124018					2151	123	0.000618511	0.296678
537	3	132124019	132925967	1678	123	6.48424e-06	0.327487	1678	123	0.00148307	0.238315
538	3	132925968	133718493	1691	215	2.39337e-05	0.131486	1691	215	0.0134919	0.000313964
539	3	133718494	135288394	2893	260	0.000122656	2.40945e-06	2893	260	0.0344238	2.22282e-11	-0.260111	0.109032	0
540	3	135288395	137372141	2786	192	5.71731e-05	0.00448196	2786	192	9.16531e-05	0.299083
541	3	137372142	138693846					1668	150	0.0078832	0.0171247
542	3	138693847	139831267	2060	200	3.22341e-05	0.0641977	2060	200	0.00950702	0.00300253
543	3	139831268	141034637	1863	220	2.20391e-05	0.152062	1863	220	0.0269871	1.64794e-08
544	3	141034638	141898978	1755	188	4.46772e-05	0.0175767	1755	188	0.0146606	0.000333149
545	3	141898979	142976707	1859	188	3.85657e-05	0.0326823	1859	188	0.0185585	1.46472e-05
546	3	142976708	144408821	2865	249	2.68944e-05	0.121214	2865	249	0.0232755	6.396e-07
547	3	144408822	145211907	1055	73	1.51859e-05	0.116102	1055	73	0.00322437	0.115279
548	3	145211908	145903838					1891	144	0.0100773	0.0029704
549	3	145903839	147358243	3115	208	1.81246e-05	0.189315	3115	208	0.0136745	0.00117695
550	3	147358244	148638308	2291	222	4.26e-05	0.0302449	2291	222	0.0165767	5.30174e-05
551	3	148638309	149998411	2832	271	9.81278e-05	0.000112262	2832	271	0.0332087	9.53354e-11
552	3	149998412	151131307	1913	219	0.000139709	2.41632e-08	1913	219	0.011246	0.00324232
553	3	151131308	151904021	1851	148	6.59025e-07	0.462559	1851	148	0.00583017	0.0442018
554	3	151904022	153406718	2907	226	7.16007e-05	0.00138595	2907	226	0.0258216	3.88288e-08
555	3	153406719	155046423					2980	200	0.0163477	4.05429e-05
556	3	155046424	155928190	1596	115	4.21821e-05	0.00702822	1596	115	0.00999035	0.00181001
557	3	155928191	156795410					1566	137	0.00582513	0.0412347
558	3	156795411	157633700	1708	138	1.53874e-05	0.181096	1708	138	0.0190385	3.52239e-06
559	3	157633701	158460058	1823	82	4.77598e-05	0.000911815	1823	82	0.00777617	0.00231112
560	3	158460059	159478751	1576	171	9.5379e-05	8.44964e-06	1576	171	0.00374775	0.103959
561	3	159478752	160584961					1773	131	0.00648577	0.0283353
562	3	160584962	161628883	2321	108	1.4781e-05	0.163207	2321	108	0.0152314	7.62717e-06
563	3	161628884	162622604	2869	116	2.28981e-05	0.0789703	2869	116	0.00912457	0.00543533
564	3	162622605	163250112	1722	42	6.54618e-06	0.232235	1722	42	0.00240839	0.120397
565	3	163250113	164037360	1869	71	3.70658e-06	0.359418
566	3	164037361	165054911					1737	118	0	0.471914
567	3	165054912	165936511	2060	107	2.98458e-05	0.0316897	2060	107	0.00629084	0.027319
568	3	165936512	167118893	3158	113	3.56025e-06	0.388223
569	3	167118894	168972662	2747	214	1.59705e-05	0.219416	2747	214	0.0162922	0.000127953
570	3	168972663	170174578	2072	211	0.000116423	1.13683e-06	2072	211	0.0306774	4.57269e-10	-0.461585	0.00597163	0
571	3	170174579	171134849	1754	210	2.37722e-05	0.130498	1754	210	0.00670235	0.0258365
572	3	171134850	172004760	1588	169	5.69703e-05	0.00303328	1588	169	0.0319764	9.91275e-11
573	3	172004761	173415591	2553	249	0.000105112	2.48355e-05	2553	249	0.0403949	1.00755e-13
574	3	173415592	174684707	1900	187	7.07372e-05	0.000695774
575	3	174684708	175671424	1945	172	3.87269e-06	0.399911	1945	172	0.0155798	0.000148681
576	3	175671425	176931163	2531	204	2.42225e-05	0.123313	2531	204	0.0217274	1.5529e-06
577	3	176931164	178110322	2189	249	2.19362e-05	0.166442	2189	249	0.00961315	0.00411758
578	3	178110323	179372165	2362	197	2.30134e-05	0.130785	2362	197	0.00316214	0.0938813
579	3	179372166	181424323	2177	188	3.25593e-05	0.0574585	2177	188	0.00572036	0.0437694
580	3	181424324	183203155	2251	224	3.69543e-06	0.412786
581	3	183203156	184524268	2851	301	0.000129021	3.15942e-06	2851	301	0.0233686	4.70892e-10	-0.2863	0.0851554	0
582	3	184524269	185709996	1824	159	7.60246e-05	0.000141246	1824	159	0.00708307	0.0238692
583	3	185709997	186602045	1716	264	9.6355e-05	0.000122584	1716	264	0.0263222	2.13322e-07
584	3	186602046	187939199	2914	316	0.000164983	1.85086e-08	2914	316	0.0336945	5.17062e-14	-0.20638	0.141057	0
585	3	187939200	189451805	2601	266	9.18177e-05	0.000232357	2601	266	0.0183709	2.41861e-05
586	3	189451806	190591293	2773	250	2.07591e-05	0.17907	2773	250	0.0226229	1.6569e-06
587	3	190591294	191229357					1547	110	0.00214477	0.221456
588	3	191229358	192049688					2155	153	0.00917018	0.00381641
589	3	192049689	193122090	1735	173	8.9194e-06	0.306288	1735	173	0.0156914	8.57176e-05
590	3	193122091	194217140	2213	268	6.87351e-06	0.368423	2213	268	0.0264753	1.09383e-07
591	3	194217141	195196789	2761	274	9.39678e-05	0.00020589	2761	274	0.0141561	0.000974375
592	3	195196790	195710290	502	104	4.56454e-05	0.00309591	502	104	0.0101863	0.00226992
593	3	195710291	196383152	1370	205	2.0916e-05	0.156343	1370	205	0.00358005	0.115129
594	3	196383153	197147990					1680	220	0.0406348	6.02208e-14
595	3	197147991	197962380	794	109	2.97985e-05	0.0329615	794	109	0.00311708	0.136191
596	4	10227	812415					1212	97	0.00612014	0.0257693
597	4	812416	1529267	1448	153	1.69381e-06	0.440892	1448	153	0.00722345	0.0257222
598	4	1529268	2468935	1552	202	8.81983e-05	8.19687e-05	1552	202	0.0108911	0.00251835
599	4	2468936	3549229	2205	214	7.49744e-05	0.000714374	2205	214	0.00714427	0.0189737
600	4	3549230	4266178	684	119	2.96132e-05	0.039085	684	119	0.00702637	0.0247702
601	4	4266179	5051834	2205	255	8.40086e-05	0.000505977	2205	255	0.00442243	0.0301973
602	4	5051835	5972709	2367	267	3.02021e-05	0.103788	2367	267	0.0201196	1.62286e-06
603	4	5972710	7135819	2664	334	3.59389e-05	0.0899353
604	4	7135820	7726034					2286	337	0.0411525	5.04601e-16
605	4	7726035	8309826	1752	257	3.99083e-05	0.0487484	1752	257	0.0237033	3.42287e-08
606	4	8309827	8882616	1092	151	7.69243e-06	0.318297	1092	151	0.00471455	0.0609805
609	4	9916157	10370666					1313	72	0.000198737	0.387335
610	4	10370667	11050119	1225	150	1.1909e-05	0.24278	1225	150	0.0100956	0.00568559
611	4	11050120	12209028	2855	219	2.10193e-05	0.162205	2855	219	0.0123862	0.000650268
612	4	12209029	13127576					2422	183	0.0236281	3.83762e-07
613	4	13127577	14395886	3108	255	2.46235e-05	0.143444	3108	255	0	0.221239
614	4	14395887	14967147	1557	127	4.77149e-06	0.366531	1557	127	0.00954101	0.00274291
615	4	14967148	15910801	1938	181	2.86995e-05	0.0765963
616	4	15910802	17290236	3032	280	0.000136749	5.06235e-07	3032	280	0.0247803	1.54017e-07	-0.314774	0.0705006	0
617	4	17290237	18753263					2618	199	0.0147912	0.00024879
618	4	18753264	20086838	3462	173	2.681e-07	0.472206	3462	173	0.0052058	0.0501537
619	4	20086839	21416380	3081	270	4.16729e-05	0.0457006	3081	270	0.0215255	1.71399e-06
620	4	21416381	22835185	2792	197	2.30011e-05	0.130987	2792	197	0.00517183	0.0782454
621	4	22835186	23858350	1761	180	0.000135178	6.45685e-09	1761	180	0.00825805	0.00743543
622	4	23858351	24764724	1797	233	5.48291e-05	0.0102344	1797	233	0.00121158	0.0338573
623	4	24764725	25832018	2259	238	0.000106387	1.49436e-05	2259	238	0.0222804	1.21182e-06	-0.569786	0.00373454	0
624	4	25832019	27385580	2308	274	3.79033e-05	0.0623544	2308	274	0.0102904	0.00195344
625	4	27385581	28177792					2145	166	0.001592	0.223206
626	4	28177793	28927438					1977	121	0.00143308	0.249782
627	4	28927439	29758399					1971	131	0.000448936	0.310549
628	4	29758400	30455555					778	77	0.00593394	0.024292
629	4	30455556	31395092	1912	121	1.45404e-05	0.179103	1912	121	0.00450749	0.0834214
630	4	31395093	32260117	1640	96	2.40735e-05	0.0544577	1640	96	0.000117744	0.376574
631	4	32260118	32746820	1210	65	1.30452e-05	0.136134	1210	65	0.00248853	0.150961
632	4	32746821	33640822	568	36	1.55796e-05	0.0506469
633	4	33640823	34721845	1284	29	1.56932e-06	0.386552	1284	29	0.00692646	0.000819356
634	4	34721846	35411236					1437	113	0.00907118	0.00453759
635	4	35411237	35993838					2044	80	0.00660084	0.0151056
636	4	35993839	36671801					1744	130	0.00243815	0.200443
637	4	36671802	37880860	3436	259	2.75786e-05	0.120288	3436	259	0.0158208	0.000226422
638	4	37880861	38984838	2627	283	0.000105698	5.29843e-05	2627	283	0.0277642	3.5404e-10
639	4	38984839	39820061	1589	164	2.64128e-05	0.0834335	1589	164	0.0148527	0.000288351
640	4	39820062	40590541	1741	233	6.72358e-05	0.00263588	1741	233	0.0080601	0.0073287
641	4	40590542	41360937	1674	183	9.0473e-06	0.308521	1674	183	0.00788228	0.0145507
642	4	41360938	42189251					1182	117	0.0129359	0.000418981
643	4	42189252	43192424	2790	175	4.81778e-05	0.0100306	2790	175	0.0109416	0.0019665
644	4	43192425	43962561	1592	94	1.03787e-05	0.223324	1592	94	0.00875844	0.0034268
645	4	43962562	45186767	3262	175	1.23047e-06	0.452904	3262	175	0.00674981	0.0237443
646	4	45186768	46358360					1940	145	0.00639663	0.036669
647	4	46358361	47408265	1694	171	9.36245e-06	0.29771	1694	171	0.00852523	0.00670867
648	4	47408266	49325138	2699	186	1.03442e-07	0.475771	2699	186	0.0122412	0.000758756
649	4	49325139	53879571					1098	101	0.00105361	0.318061
650	4	53879572	54659778					1416	135	0.0179665	1.23646e-05
651	4	54659779	55681701	1801	217	3.38e-06	0.417085	1801	217	0.0221364	5.82726e-07
652	4	55681702	57103100	3395	253	8.57743e-06	0.339176	3395	253	0.0114275	0.00194917
653	4	57103101	58011085	2274	212	4.97195e-07	0.469119	2274	212	0.0024814	0.126884
654	4	58011086	58940256	2174	200	4.7808e-05	0.0145112	2174	200	0.00908151	0.00951457
655	4	58940257	59692948	1940	115	5.90043e-06	0.335495	1940	115	0.00304166	0.122916
656	4	59692949	60746709	2604	140	1.77993e-05	0.150681	2604	140	0.0136471	0.000275056
657	4	60746710	61971161	2696	119	6.7627e-05	0.000124855	2696	119	0.0095645	0.00488493
658	4	61971162	63337954	2455	225	5.45527e-05	0.00961661	2455	225	0.0100929	0.0043416
659	4	63337955	64117431	1684	112	3.63078e-05	0.0149812	1684	112	0.00800469	0.0102426
660	4	64117432	65563100	2884	122	1.08345e-05	0.24098	2884	122	0.0217637	1.48046e-07
661	4	65563101	66597446	2415	145	1.21157e-05	0.236159	2415	145	0.00525178	0.0561966
662	4	66597447	67616362					2222	151	0.00332114	0.128649
663	4	67616363	68742859					2357	172	0.0145518	0.000212183
664	4	68742860	69603368	1086	55	7.35801e-06	0.236871	1086	55	0.00520727	0.024997
665	4	69603369	70516836	2557	73	1.95306e-05	0.0675886	2557	73	0.00585579	0.0152934
666	4	70516837	71468300					2565	122	0.00475754	0.0664687
667	4	71468301	73258294	1775	125	2.13784e-05	0.0994266	1775	125	0.0100139	0.00383976
668	4	73258295	74885900	2122	121	4.51181e-05	0.00534187	2122	121	0.0067363	0.0254016
669	4	74885901	76497358	2874	197	7.40818e-05	0.000554281	2874	197	0.00412047	0.0770267
670	4	76497359	78045637	3355	241	0.000145657	2.34764e-08	3355	241	0.0203458	6.07897e-06	-0.292618	0.103049	0
671	4	78045638	78967715	2122	154	4.91097e-05	0.00629242	2122	154	0.0129828	0.000474603
672	4	78967716	79880101	1674	117	4.72281e-06	0.362995	1674	117	0.00134865	0.257778
673	4	79880102	81206182	1848	138	2.99782e-05	0.0472325	1848	138	0.0114056	0.0015635
674	4	81206183	82655623	1051	131	2.4227e-05	0.079184	1051	131	0.00482115	0.0586252
675	4	82655624	84003062	2686	206	2.19974e-05	0.145567	2686	206	0.00943993	0.00938023
676	4	84003063	85437805	2267	191	1.65385e-05	0.200107	2267	191	0.0136806	0.000834757
677	4	85437806	86931670	2488	138	2.74102e-05	0.0616184	2488	138	0.010875	0.001927
678	4	86931671	88502717	2660	169	3.67902e-05	0.0323736	2660	169	0.014837	6.15401e-06
679	4	88502718	89244554	1861	164	1.6401e-05	0.18532	1861	164	0.00786902	0.0071161
680	4	89244555	90236971	1748	173	5.68341e-05	0.00334735	1748	173	0.00567443	0.0345196
681	4	90236972	91309863	1795	142	1.65536e-05	0.167881	1795	142	0.0109059	0.00282801
682	4	91309864	92219192	1784	157	9.24703e-06	0.292656
683	4	92219193	93451599	1946	170	4.63405e-06	0.384471	1946	170	0.00733587	0.0196315
684	4	93451600	94757265					2273	179	0.00987467	0.00132439
685	4	94757266	96183801	2405	188	8.32763e-05	0.000114005	2405	188	0.0108365	0.00240283
686	4	96183802	97540787	3048	219	7.43184e-06	0.348198	3048	219	0.0144192	0.000266674
687	4	97540788	98445515					1297	112	0.0116158	0.000880427
688	4	98445516	99532480					1709	77	0.00363061	0.0873102
689	4	99532481	100333334					1892	127	0.000111874	0.358156
690	4	100333335	101132995	1730	149	3.94074e-05	0.0190449	1730	149	0.00352606	0.0973871
691	4	101132996	102544803	3001	201	4.01735e-06	0.4032	3001	201	0.00111527	0.206191
692	4	102544804	104384534	3088	211	8.43303e-05	0.000184884
693	4	104384535	105319195					1257	108	0.00474711	0.0600657
694	4	105319196	106479155	1980	163	2.85174e-05	0.068546	1980	163	0.0106442	0.00260452
695	4	106479156	108131206	2651	196	5.54064e-05	0.00591628	2651	196	0.00374178	0.111685
696	4	108131207	109122458	1657	182	7.64772e-05	0.000267003	1657	182	0.00914524	0.00577497
697	4	109122459	109978982	1850	177	4.79692e-05	0.0105686	1850	177	0.00403054	0.0624377
698	4	109978983	111733579	3103	270	0.000151932	2.77663e-08	3103	270	0.0336156	6.45929e-14	0.0904074	0.525156	0
699	4	111733580	112830229	1788	165	5.70574e-05	0.00275355	1788	165	0.013658	0.000516747
700	4	112830230	113916002	1824	163	8.26453e-05	5.4785e-05	1824	163	0.0181258	1.40328e-05
701	4	113916003	115306149	2540	231	0.000154952	2.49051e-09	2540	231	0.0215282	1.24854e-06	-0.0849111	0.61669	0
702	4	115306150	116204703					1483	92	0.00456434	0.0610633
703	4	116204704	117313636	2218	127	2.68605e-06	0.413639	2218	127	0.000838861	0.285876
704	4	117313637	118395262	2625	157	8.42658e-06	0.307772	2625	157	0.0124784	0.000553772
705	4	118395263	119138097	1295	82	9.02746e-06	0.237284	1295	82	0.00191656	0.21926
706	4	119138098	119927262	1521	111	2.4086e-05	0.066	1521	111	0.00945863	0.00459645
707	4	119927263	120563073					1472	77	0.00779658	0.00261757
708	4	120563074	121393008					1749	132	0.0126318	0.000669449
709	4	121393009	121981243	1755	114	1.25236e-08	0.47578	1755	114	0.0072447	0.0166008
710	4	121981244	122655434					1892	169	0.0176923	3.32692e-05
711	4	122655435	123768693					1767	154	0.0106152	0.00348084
712	4	123768694	124534997	1503	117	1.74919e-07	0.471812	1503	117	0.00937148	0.00455555
713	4	124534998	125486535					2315	150	0.01125	0.00306295
714	4	125486536	126476842	2335	188	3.02496e-05	0.070234	2335	188	0.010708	0.00161105
715	4	126476843	127279171	1817	157	1.69535e-05	0.173696	1817	157	0.00179324	0.205564
716	4	127279172	128321876					2230	156	0.00586627	0.0301777
717	4	128321877	129625376	1353	156	4.65659e-06	0.379859	1353	156	0.0223435	2.86754e-07
718	4	129625377	131098950	2704	204	2.60408e-05	0.107786	2704	204	0.00417383	0.0714681
719	4	131098951	131873453					1768	122	0.00958121	0.00308819
720	4	131873454	132801980	1263	95	5.11528e-06	0.340665	1263	95	0.00646426	0.0232518
721	4	132801981	133524886	1561	75	1.22084e-05	0.165436	1561	75	0.00193757	0.201526
722	4	133524887	134109978					1256	72	0.00661299	0.0134401
723	4	134109979	135809542					3111	169	0.005633	0.0401445
724	4	135809543	137400031					2664	164	0.00546252	0.0461722
725	4	137400032	138537344					3293	219	0.0215552	5.75696e-06
726	4	138537345	139553760					2251	199	0.00521219	0.0435615
727	4	139553761	141087047	2523	288	7.13599e-05	0.00351765	2523	288	0.0391675	1.39178e-15
728	4	141087048	142807914	2966	235	4.39482e-05	0.0297442	2966	235	0.0121791	0.00155877
729	4	142807915	144401042	2628	130	1.42665e-06	0.44288	2628	130	0.00239655	0.180636
730	4	144401043	146174871	2145	138	3.1133e-05	0.0417646	2145	138	0.00591442	0.0414846
731	4	146174872	147161042	1653	207	2.50652e-06	0.431569	1653	207	0.019755	1.40922e-05
732	4	147161043	148462208					2037	144	0.0079306	0.010056
733	4	148462209	149998528	2258	202	2.79458e-05	0.0922033	2258	202	0.00734583	0.0252899
734	4	149998529	151014322	1245	110	3.73519e-05	0.0124518	1245	110	0	0.269942
735	4	151014323	152162098	992	107	8.34135e-06	0.276702	992	107	0.00179107	0.209381
736	4	152162099	153520883	2111	173	7.63682e-07	0.462077	2111	173	0.0092791	0.00898011
737	4	153520884	155044409	3196	294	0.000141365	3.89546e-07	3196	294	0.0574949	1.78204e-25	0.113431	0.387294	0
738	4	155044410	156520288	2671	241	7.02864e-05	0.00209298	2671	241	0.0317905	5.67992e-10
739	4	156520289	157597309	2961	222	0.00010406	1.3113e-05	2961	222	0.0156597	0.000112251
740	4	157597310	159176073	2417	152	5.4581e-06	0.36236	2417	152	0.0131	0.000319169
741	4	159176074	160828480	2631	193	1.6256e-05	0.204936	2631	193	0.0162229	3.6825e-05
742	4	160828481	161666201	1929	173	4.67792e-06	0.384334	1929	173	0.0197573	4.2705e-06
743	4	161666202	162239289	2126	127	1.02374e-05	0.255851	2126	127	0.00806335	0.00907861
744	4	162239290	163245541	2370	174	2.5212e-05	0.098436	2370	174	0.0108661	0.00220897
745	4	163245542	163937103	1700	119	1.20999e-05	0.21633	1700	119	0.00559743	0.0385302
746	4	163937104	164781847	1262	140	7.04728e-06	0.325024	1262	140	0.0100808	0.00491567
747	4	164781848	165824650	2495	191	2.10401e-08	0.477202	2495	191	0.0154482	9.22563e-05
748	4	165824651	166702855	2137	205	7.58241e-05	0.000525155	2137	205	0.0143815	0.000140207
749	4	166702856	167643768	1436	120	2.43971e-05	0.0702853	1436	120	0.00966704	0.00411028
750	4	167643769	168623790	2120	145	9.81799e-07	0.455348	2120	145	0.00520524	0.0550544
751	4	168623791	169555114	2191	179	3.05953e-05	0.0639813	2191	179	0.00617814	0.0455565
752	4	169555115	170682809	1919	182	3.28716e-05	0.0532899	1919	182	0.00342265	0.102271
753	4	170682810	171643019	2291	133	9.26653e-06	0.277905	2291	133	0.00362019	0.111045
754	4	171643020	172555990					1698	79	0.00643625	0.0214728
755	4	172555991	174470206	2781	232	1.04605e-05	0.304688	2781	232	0.00643643	0.0276691
756	4	174470207	175295842	1634	220	2.07928e-05	0.165229	1634	220	0.0155978	0.000124921
757	4	175295843	175959697	1822	180	2.92566e-05	0.0725388	1822	180	0.00770043	0.0160539
758	4	175959698	177129678	1910	199	5.11555e-05	0.0100143	1910	199	0.0176052	0.000120159
759	4	177129679	178314527	2239	228	7.53271e-05	0.000905883	2239	228	0.0357512	1.84471e-13
760	4	178314528	179233905					1890	186	0.00908957	0.00482706
761	4	179233906	179932391	1334	132	1.98621e-05	0.12057	1334	132	0.00149376	0.262133
762	4	179932392	180540877	1663	135	1.13024e-05	0.24288
763	4	180540878	181122433	1763	180	4.29066e-05	0.0193647	1763	180	0.00975758	0.00450204
764	4	181122434	182065646					2664	286	0.0301349	4.05426e-09
765	4	182065647	182946258	2722	289	8.96615e-05	0.000463117	2722	289	0.0263764	2.67866e-08
766	4	182946259	183603892	1741	258	7.63522e-05	0.00134185	1741	258	0.0183662	2.209e-05
767	4	183603893	184338584	1688	223	1.56576e-05	0.227577	1688	223	0.00291665	0.126846
768	4	184338585	185483262	2903	339	6.34549e-05	0.0120562	2903	339	0.0326533	1.02477e-12
769	4	185483263	186232882					2007	221	0.0171551	3.04361e-05
770	4	186232883	186881568	1689	254	1.35879e-05	0.267619	1689	254	0.0333575	1.71308e-10
771	4	186881569	187985393	2783	305	1.19744e-05	0.304205	2783	305	0.0375838	5.99881e-13
772	4	187985394	189153279	2790	285	6.93621e-05	0.00416493	2790	285	0	0.318099
773	4	189153280	189899573	3111	248	1.15719e-05	0.29351	3111	248	0.0245314	3.93612e-08
774	4	189899574	191043880	1722	183	4.63919e-06	0.387845	1722	183	0	0.389137
775	5	10043	598320	1106	118	1.03823e-05	0.246242	1106	118	0.0034221	0.127585
776	5	598321	1206609	886	153	1.88504e-05	0.147593	886	153	0.017307	1.57524e-05
777	5	1206610	2106885	2718	308	9.98563e-05	0.000188668	2718	308	0.0218612	1.3076e-06
778	5	2106886	2960068	2500	290	3.67993e-08	0.47733	2500	290	0.0585818	2.11948e-25
779	5	2960069	3677595	2565	245	4.55961e-05	0.0278451	2565	245	0	0.196412
780	5	3677596	4636542	1773	197	2.54772e-05	0.108644	1773	197	0.018187	4.75545e-05
781	5	4636543	5828694	2359	273	5.10328e-05	0.0213762	2359	273	0.023567	7.85807e-08
782	5	5828695	6936733	3286	288	5.33288e-05	0.0195989	3286	288	0.0118227	0.000192963
783	5	6936734	8079415	2857	233	2.45933e-05	0.13391	2857	233	0.00930115	0.00320947
784	5	8079416	9203855	2449	156	2.62165e-05	0.0803703	2449	156	0.0150611	0.000143406
785	5	9203856	10549029	2563	300	9.98769e-05	0.00016102	2563	300	0.0342874	3.23809e-11
786	5	10549030	11850850	2479	252	5.75093e-05	0.00960053	2479	252	0.0236323	2.79025e-07
787	5	11850851	12867189					1354	69	0.0043362	0.0633069
788	5	12867190	13608147	1501	92	2.36881e-05	0.0538382	1501	92	0.00530903	0.039403
789	5	13608148	14910295	2773	266	9.13789e-05	0.000243559	2773	266	0.0244995	5.74033e-07
790	5	14910296	16592319	2535	230	1.36192e-05	0.258027	2535	230	0.0101802	0.00503033
791	5	16592320	17803477	2342	293	5.58604e-05	0.016366	2342	293	0.0495819	5.05663e-18
792	5	17803478	18791410					2251	149	0.00958194	0.0068834
793	5	18791411	20397013	2700	161	1.09272e-05	0.265993	2700	161	0.00673607	0.0328391
794	5	20397014	21211399	1143	71	1.00712e-05	0.200484	1143	71	0.00496489	0.0376347
795	5	21211400	22149042	1114	93	1.36766e-05	0.164068	1114	93	0.00948948	0.00280303
796	5	22149043	23246745	1901	120	1.31122e-05	0.200415	1901	120	0.00877806	0.00485447
797	5	23246746	24362661	1838	81	5.97752e-06	0.307451	1838	81	0.00692456	0.0107149
798	5	24362662	25722097	2475	190	1.853e-05	0.174832	2475	190	0.0100926	0.00568009
799	5	25722098	26938178	3086	183	4.65605e-05	0.0134812	3086	183	0.0153662	9.0344e-05
800	5	26938179	28315653					1999	169	0.0180697	2.03975e-05
801	5	28315654	29593755	2911	158	4.01239e-05	0.019873	2911	158	0.0148045	6.47613e-05
802	5	29593756	30416066					2509	121	0.00361134	0.110032
803	5	30416067	31679464	2562	258	0.000121678	2.6378e-06	2562	258	0.0270667	1.05769e-07	-0.0514847	0.773524	0
804	5	31679465	32727914	2329	276	1.90971e-05	0.20745	2329	276	0.0315544	5.39186e-11
805	5	32727915	33971056	2550	209	5.5859e-05	0.0067925	2550	209	0.0115672	0.000796952
806	5	33971057	35157146	1997	210	1.99191e-05	0.169361	1997	210	0.0182378	3.81246e-05
807	5	35157147	36431967	2585	197	7.10841e-05	0.000833186
808	5	36431968	37925487	2410	222	3.22451e-05	0.073334	2410	222	0.0307198	3.45535e-10
809	5	37925488	39438985	2097	205	5.39869e-05	0.00789842	2097	205	0.0274147	2.41618e-08
810	5	39438986	40290851					2256	128	0.000701143	0.328385
811	5	40290852	41279590					2247	157	0.0124219	0.00074107
812	5	41279591	42856332	2538	123	1.08816e-05	0.241042	2538	123	0.0119799	0.000654034
813	5	42856333	44049878					1987	111	0.0218592	4.24072e-15
814	5	44049879	45305566					1238	67	0.00656939	0.0134187
816	5	46388849	50164835	1172	35	1.27467e-05	0.0812452
817	5	50164836	51203265	1624	135	8.0322e-06	0.302797	1624	135	0.00668649	0.0325346
818	5	51203266	52139773	1949	142	1.49294e-05	0.190607	1949	142	0.00690138	0.0175756
819	5	52139774	52837225	1745	153	6.51862e-05	0.000642252	1745	153	0.0123906	0.000861873
820	5	52837226	53747856	2172	203	0.000115719	9.16048e-07	2172	203	0.0151716	0.000518471
821	5	53747857	55221398					3371	209	0.0347664	5.30192e-12
822	5	55221399	55968966	1740	260	7.04956e-05	0.00268359	1740	260	0.020433	3.83235e-06
823	5	55968967	56896890	1898	208	8.90277e-05	8.52117e-05	1898	208	0.0213597	2.36962e-06
824	5	56896891	57895012	2390	179	8.94958e-05	3.13945e-05	2390	179	0.0194161	1.77297e-05
825	5	57895013	58721458	2082	209	7.83414e-05	0.000404898	2082	209	0.0206232	3.1892e-06
826	5	58721459	59868567	1317	132	7.02708e-05	0.000136619	1317	132	0.00675643	0.0237241
827	5	59868568	60930753					1490	101	0	0.432408
828	5	60930754	62180368	1999	170	6.5595e-06	0.347709	1999	170	0.00296121	0.12964
829	5	62180369	63214089					2254	141	0.000971561	0.263874
830	5	63214090	64438518	1764	163	3.09524e-05	0.0545485	1764	163	0.0100804	0.00508605
831	5	64438519	65606870	1896	163	5.05748e-05	0.00616454	1896	163	0.00518965	0.0521958
832	5	65606871	67096191	2512	214	3.32209e-05	0.0646789	2512	214	0.0268439	6.60174e-08
833	5	67096192	68006993	1846	234	9.51018e-05	7.1487e-05	1846	234	0.0131768	0.000823977
834	5	68006994	71468651	2552	189	4.91026e-05	0.0109996	2552	189	0.0203736	6.64063e-06
835	5	71468652	73314061	2998	245	3.93772e-05	0.0471511	2998	245	0.011036	0.00204643
836	5	73314062	74245354	1903	209	1.96578e-05	0.171962	1903	209	0.0259126	8.95263e-10
837	5	74245355	75239302					1662	93	0.000151359	0.40009
838	5	75239303	75959515	1588	201	1.29425e-05	0.25473	1588	201	0.0129574	0.000672773
839	5	75959516	77290255					2858	289	0.0226	1.8183e-06
840	5	77290256	79005158	2708	227	6.55447e-05	0.00292042	2708	227	0.0150161	0.000152949
841	5	79005159	80448225	3241	290	4.47912e-05	0.0400976	3241	290	0.0502005	1.1158e-17
842	5	80448226	81710194	1870	221	4.69874e-05	0.0198104	1870	221	0.00180607	0.123759
843	5	81710195	82720248	1718	203	4.12804e-05	0.0290117	1718	203	0.0299161	2.37049e-09
844	5	82720249	84094797	2264	274	1.08927e-06	0.460461	2264	274	0.0038199	0.0818284
847	5	85311780	86493763	1993	174	3.41136e-05	0.0444221	1993	174	0.0144588	0.000254082
848	5	86493764	87943482	1717	126	1.784e-05	0.138661	1717	126	0.00476665	0.0741667
849	5	87943483	89584466	1710	221	6.30944e-05	0.00355001	1710	221	0.0228174	1.48215e-06
850	5	89584467	90793804					1772	197	0.0133063	0.00124723
851	5	90793805	91956905					1629	166	0.0124392	0.00105204
852	5	91956906	93814604	1948	212	8.82757e-05	0.000106674	1948	212	0.0216948	1.67908e-07
853	5	93814605	95117259	2112	240	1.92497e-05	0.191488	2112	240	0.0115663	0.00196107
854	5	95117260	96467377	2619	224	5.61518e-06	0.379489	2619	224	0.0196125	1.28883e-05
855	5	96467378	97316601					1741	67	0.00251831	0.149465
856	5	97316602	98567769	2578	180	2.71958e-05	0.0865741	2578	180	0.0111155	0.000528506
857	5	98567770	99257995	1469	65	3.8174e-06	0.350658	1469	65	6.25128e-05	0.409483
858	5	99257996	100594081					2048	95	0.0057934	0.0314562
859	5	100594082	101575367					1997	108	0.00259044	0.000306865
860	5	101575368	102903985					2329	130	0.0127385	0.000382448
861	5	102903986	103788460	1729	219	2.65289e-05	0.111109	1729	219	0.00667955	0.0399587
862	5	103788461	104850490	2157	152	3.09691e-06	0.410749	2157	152	0	0.454519
863	5	104850491	106389388	2844	207	6.35875e-05	0.00266822	2844	207	0.000201662	0.251725
864	5	106389389	107265911	1951	230	5.74076e-05	0.00754335	1951	230	0.0326474	9.00388e-11
865	5	107265912	108641784	3064	171	4.74697e-05	0.0102464	3064	171	0.000901055	0.200358
866	5	108641785	109606905					2036	168	0.00265497	0.147139
867	5	109606906	110819517	1433	121	1.57679e-05	0.161282	1433	121	0.0150199	7.5416e-05
868	5	110819518	111983115	2552	197	3.44121e-05	0.0521448	2552	197	0.0139992	0.000433493
869	5	111983116	113121555					2908	162	0.0217073	4.97912e-08
870	5	113121556	113998532	2168	186	4.50608e-05	0.016493	2168	186	0.0133513	0.000407225
871	5	113998533	115117631	2460	195	7.31806e-05	0.000597599	2460	195	0.0120834	0.00116915
872	5	115117632	116208000	2808	270	3.72033e-05	0.064071	2808	270	0.0116541	0.00105855
873	5	116208001	117348497	2263	206	5.66814e-05	0.00592175	2263	206	0.00174441	0.173433
874	5	117348498	118605251					2795	224	0.0147007	0.000164712
875	5	118605252	119664173	2132	192	6.25816e-06	0.360148	2132	192	0.0153863	0.000130007
876	5	119664174	120371857					1721	117	0.00408243	0.0737614
877	5	120371858	120960737	1904	142	6.57306e-05	0.000422009	1904	142	0	0.481452
878	5	120960738	122005291	1554	148	6.14942e-05	0.000971434
879	5	122005292	123191941	2729	170	2.42607e-05	0.104215	2729	170	0.00128329	0.221583
880	5	123191942	124109485	1808	232	3.31812e-05	0.0718879	1808	232	0.00625211	0.00027125
881	5	124109486	125131720	2460	267	7.39136e-05	0.00202734	2460	267	0.0151066	0.000155743
882	5	125131721	126054697	2406	199	6.50177e-05	0.00192995	2406	199	0.0148262	0.000383313
883	5	126054698	126992836	1864	132	1.25386e-05	0.21976	1864	132	0.0199638	6.53802e-07
884	5	126992837	128067414					1527	120	0	0.480022
885	5	128067415	128734905	1998	123	1.01709e-05	0.254032	1998	123	0.00391236	0.0860129
886	5	128734906	130573817	1944	116	1.90169e-05	0.116368	1944	116	0.000244993	0.309742
887	5	130573818	132554690	2032	156	6.35589e-05	0.000889955	2032	156	0.0070021	0.0191894
888	5	132554691	134556570	3380	333	5.9567e-05	0.0159495	3380	333	0.0314818	3.42053e-11
889	5	134556571	135344943	1412	160	5.9272e-05	0.00182789	1412	160	0.00922878	0.0108038
890	5	135344944	136949853	2629	197	5.79054e-05	0.00448071	2629	197	0.0202891	1.09162e-05
891	5	136949854	139408116	2615	220	0.000127889	2.20845e-07	2615	220	0.0357219	4.51166e-12	-0.464202	0.00290062	0
892	5	139408117	141253830	2756	238	1.84466e-05	0.199766	2756	238	0.0195705	7.18077e-06
893	5	141253831	142532956	1845	240	5.83651e-05	0.0077152	1845	240	0.0170638	4.03685e-05
894	5	142532957	143605908	1943	200	6.09886e-05	0.00323749	1943	200	0.020074	6.61704e-06
895	5	143605909	145319096	2665	164	7.42162e-06	0.32926	2665	164	0.000985074	0.262259
896	5	145319097	147180171	2888	217	5.06929e-05	0.0130868	2888	217	0.0238398	5.30768e-07
897	5	147180172	148662214	2682	211	9.46436e-05	3.98871e-05	2682	211	0.013804	0.000870646
898	5	148662215	149850203	2252	286	7.27123e-05	0.00298893	2252	286	0.0168165	4.75106e-05
899	5	149850204	150981934	2123	221	2.40051e-05	0.133636	2123	221	0.0170757	3.99711e-05
900	5	150981935	151892617	1891	142	4.9186e-05	0.00489326	1891	142	0.00320354	0.13881
901	5	151892618	152878627	1778	146	5.94266e-05	0.00125496	1778	146	0.00874683	0.011177
902	5	152878628	153734494	2102	152	1.92078e-05	0.142529	2102	152	0.0110074	0.00268981
903	5	153734495	154599750	1767	220	4.04799e-05	0.0361318	1767	220	0.00465834	0.0415846
904	5	154599751	155459556					1863	162	0.0157022	0.000184134
905	5	155459557	156345451	1593	139	4.23377e-05	0.0113413	1593	139	0.0158779	3.9428e-05
906	5	156345452	157191081	2152	171	3.11015e-05	0.0574997	2152	171	0.0183471	1.18102e-05
907	5	157191082	158484775	2693	234	9.69977e-05	5.40048e-05	2693	234	0.0291112	1.62277e-09
908	5	158484776	159663733	2218	231	5.75403e-05	0.00755506	2218	231	0.0271844	3.06887e-08
909	5	159663734	160519049	1897	214	6.12367e-05	0.00393962	1897	214	0.0211432	3.7672e-06
910	5	160519050	161478177	2001	141	1.35933e-05	0.209711	2001	141	0.00512265	0.0480234
911	5	161478178	162386027	1406	142	1.44681e-05	0.197296	1406	142	0.00947464	0.00605431
912	5	162386028	163781268	2943	242	7.20127e-05	0.00173327	2943	242	0.0322701	9.74373e-10
913	5	163781269	165289211	2900	256	4.72111e-06	0.400548	2900	256	0.00878967	0.00239906
914	5	165289212	166863413	2382	294	0.00016306	1.09556e-08	2382	294	0.0188793	5.50895e-10	-0.274757	0.0701543	0
915	5	166863414	168342743	2384	302	0.00012434	6.32013e-06	2384	302	0.0245655	2.47419e-07	0.0123175	0.946297	0
916	5	168342744	169506966	2713	277	8.65439e-05	0.000546661	2713	277	0.0107083	0.000883309
917	5	169506967	170898340	2879	285	5.5418e-05	0.0159266	2879	285	0.0104494	0.000376659
918	5	170898341	172285682	2899	333	5.66774e-05	0.0203078	2899	333	0.0185206	1.6882e-07
919	5	172285683	173606995	2774	278	2.01567e-05	0.197071	2774	278	0.0244446	1.17738e-07
920	5	173606996	174662885	2383	288	0.000112961	2.2211e-05	2383	288	0.0108352	0.00276217
921	5	174662886	176180301	2169	270	5.23602e-05	0.0185476	2169	270	0.0304555	1.71418e-09
922	5	176180302	177659902	1756	196	5.68522e-05	0.00502275	1756	196	0.0133214	0.000588341
923	5	177659903	178595252	2679	263	0.000103015	4.82815e-05	2679	263	0.0260553	2.915e-08
924	5	178595253	179794710	2751	323	0.000164949	2.42529e-08	2751	323	0.0378417	6.05163e-14	-0.524608	0.000207215	1
925	5	179794711	180902886	1803	223	4.2108e-05	0.0319097	1803	223	0.0138862	0.000439503
926	6	63979	1380679	2676	302	5.50878e-05	0.0187513	2676	302	0.0430371	1.64241e-14
927	6	1380680	2746531	2659	288	9.04377e-05	0.00041169	2659	288	0.0152939	0.000139565
928	6	2746532	3964072	2344	278	6.04753e-05	0.00934996	2344	278	0.0281496	4.07826e-08
929	6	3964073	4657086	1722	160	3.1077e-05	0.0524671
930	6	4657087	5378213	1612	162	2.57547e-05	0.0872775	1612	162	0.0213434	2.28945e-06
931	6	5378214	6621937	3170	325	4.30254e-05	0.0546659	3170	325	0.0270257	1.46145e-09
932	6	6621938	7808323	2973	317	6.2506e-05	0.0109817	2973	317	0.0144305	0.000163077
933	6	7808324	9020710	2854	212	6.50155e-05	0.00244575	2854	212	0.0196269	1.12151e-05
934	6	9020711	10416550	2916	261	7.11146e-05	0.00255401	2916	261	0.0237693	4.45656e-07
935	6	10416551	11790671	2943	282	7.76111e-05	0.00166046	2943	282	0.0174835	3.15145e-05
936	6	11790672	13352326	2738	259	9.58151e-05	0.000117348	2738	259	0.0304821	4.11413e-10
937	6	13352327	15069421	2592	275	0.000111162	2.06542e-05	2592	275	0.0247512	5.46242e-07	-0.28569	0.136904	0
938	6	15069422	16566882	3214	278	7.18416e-05	0.00295927	3214	278	0.0321394	9.02217e-11
939	6	16566883	17391994	1742	233	5.15825e-05	0.0142404	1742	233	0.0136781	0.000596178
940	6	17391995	18208676	1824	163	1.66856e-05	0.181123	1824	163	0.00747874	0.0179456
941	6	18208677	18775022					1708	117	0.00641469	0.0258363
942	6	18775023	19449152	1689	101	3.74731e-07	0.465246	1689	101	0.00861123	0.00630894
943	6	19449153	20418020	1950	245	8.34688e-05	0.000446018	1950	245	0.0137449	0.000551818
945	6	21295865	22199713	1488	218	4.88137e-05	0.0160143	1488	218	0.0175026	1.42995e-05
946	6	22199714	23192337	2532	212	6.08174e-05	0.00402097	2532	212	0.00628386	0.0358832
947	6	23192338	23939306					1959	213	0.0130343	0.0006668
948	6	23939307	24950379	2561	241	3.04247e-05	0.0923164	2561	241	0	0.467534
949	6	24950380	25684629	2113	187	3.42361e-05	0.0490013
950	6	25684630	26396200	1624	110	1.78794e-05	0.123795	1624	110	0.00451051	0.0416473
951	6	26396201	27261035					1201	77	0.00682149	0.00569094
952	6	27261036	28666364					2491	106	0.0154728	1.24078e-05
953	6	28666365	29529755					2022	77	0.00891152	0.000947732
954	6	29529756	29833843	2169	50	1.01613e-05	0.161812	2169	50	0.0057694	0.00728852
955	6	29833844	30070717					1297	31	0.00306837	0.048264
956	6	30070718	30715006	2301	86	3.44013e-05	0.0105632	2301	86	0.00988653	0.000515805
957	6	30715007	31106493	2045	102	3.50767e-05	0.0143514	2045	102	0.00014637	0.34794
958	6	31106494	31250556	1456	37	2.99956e-06	0.34088
959	6	31250557	31320268	851	24	7.54294e-06	0.146772	851	24	0.000947152	0.225917
960	6	31320269	31427209	1208	36	7.54845e-07	0.431985
961	6	31427210	32208901	1985	154	6.0231e-05	0.00137284	1985	154	0.000820906	0.251761
962	6	32208902	32454577	1718	44	9.58439e-06	0.160239
964	6	32539568	32586784	160	13	2.17924e-06	0.300924
965	6	32586785	32629239	110	15	5.76892e-06	0.152417
967	6	32682214	32897998	1510	62	3.3742e-05	0.00506976	1510	62	0.00334078	0.0810756
968	6	32897999	33194975	1598	103	4.41155e-05	0.00383323	1598	103	0.0107601	0.000212198
969	6	33194976	33864262	1769	178	2.72171e-05	0.0853106	1769	178	0.0292345	8.85894e-11
970	6	33864263	34979270	1925	193	4.92558e-05	0.0114166	1925	193	0.0297257	6.27307e-10
971	6	34979271	36346353	2060	197	6.01051e-05	0.00342845	2060	197	0.0200237	1.45276e-06
972	6	36346354	37570051	2586	257	0.000206616	3.36247e-13	2586	257	0.0656616	5.6817e-27	-0.731642	7.53589e-11	1	CDKN1A	DCM_GWAS,DCM_MTAG,HCM_GWAS,CC_GWAS,CC_MTAG,HCM_MTAG
973	6	37570052	38688720	2006	202	4.46502e-05	0.0204665	2006	202	0.00922474	0.00446462
974	6	38688721	39785907					2612	216	0.00545984	0.0462277
975	6	39785908	40778401	2235	193	2.99979e-06	0.420346	2235	193	0.0151556	0.000204651
976	6	40778402	42103738	2703	300	9.58693e-05	0.000265286	2703	300	0.0379037	1.62653e-11
977	6	42103739	43770626	2465	238	8.22716e-05	0.000453381	2465	238	0.0267818	7.63233e-08
978	6	43770627	44596897	1712	282	8.99185e-05	0.000399469	1712	282	0.0403745	3.04192e-14
979	6	44596898	45408421					1700	72	0.00180891	0.221362
980	6	45408422	46430701	1604	188	2.34559e-05	0.121518	1604	188	0.0190208	3.53791e-06
981	6	46430702	47313443	1678	188	2.4242e-05	0.114645	1678	188	0	0.450347
982	6	47313444	48393981	2212	141	1.13701e-05	0.245747	2212	141	0.00197883	0.212727
983	6	48393982	49528164	1786	77	1.28307e-05	0.157627	1786	77	0.0027424	0.101755
984	6	49528165	50940767	2913	165	4.77347e-05	0.00906696	2913	165	0.00348313	0.110183
985	6	50940768	51826423					2219	134	0.00346109	0.0990551
986	6	51826424	52598879	1813	203	0.000125095	1.66347e-07	1813	203	0.00141591	0.203069
987	6	52598880	53425492	1542	168	2.12592e-06	0.433925	1542	168	0.012731	0.000719381
988	6	53425493	54452767	2027	153	5.07225e-05	0.00499807	2027	153	0.0109462	0.00251973
989	6	54452768	55469137	3050	143	5.21019e-05	0.00334913	3050	143	0.00928373	0.00369463
990	6	55469138	56200985	1924	122	4.263e-05	0.0077991	1924	122	0.0107037	0.00152445
991	6	56200986	57316157	1485	135	4.43194e-06	0.377204
995	6	62693129	64010286					2559	75	0.00079039	0.332648
996	6	64010287	65759861					2860	138	0.00158272	0.231638
997	6	65759862	66445495					1584	106	0.00486443	0.011454
998	6	66445496	67036787	1677	79	9.09292e-06	0.232116	1677	79	0.00399209	0.0694553
999	6	67036788	67559694	1750	119	1.4305e-05	0.180921
1000	6	67559695	68547494	3144	130	1.0398e-05	0.25523	3144	130	0.000987569	0.280095
1001	6	68547495	69294227	2382	155	3.80976e-06	0.396761	2382	155	0.0190181	3.51879e-06
1002	6	69294228	70363348					2416	146	0.00967522	0.00512866
1003	6	70363349	71610787					2424	220	0.0128951	0.000280577
1005	6	72290724	73170168	1890	136	2.85675e-05	0.0534845
1006	6	73170169	74401506	2306	185	7.80532e-05	0.000230064	2306	185	0.0111504	0.00365349
1007	6	74401507	75461313	2584	124	7.64303e-06	0.30394	2584	124	0.00325129	0.117349
1008	6	75461314	77274030	2428	164	9.72387e-05	4.44577e-06	2428	164	0.0182318	2.55926e-05
1009	6	77274031	78168731	2088	147	5.11306e-06	0.36747	2088	147	0.0193662	2.62049e-06
1010	6	78168732	78959762	1804	78	8.28068e-06	0.248741	1804	78	5.55335e-05	0.414908
1011	6	78959763	79859903	1984	96	3.7373e-05	0.00887336	1984	96	0.00770891	0.0102861
1012	6	79859904	80693927	1901	182	9.17042e-05	2.43665e-05	1901	182	0.0101868	0.0041718
1013	6	80693928	81567706	2081	99	3.64479e-06	0.379551	2081	99	0.0137213	7.5836e-05
1014	6	81567707	82388204	2067	91	7.95459e-06	0.27076	2067	91	0.00277263	0.14733
1015	6	82388205	83571953					2229	194	0.0149045	0.000158997
1016	6	83571954	85038134	1470	147	1.25901e-05	0.229696	1470	147	0.0226245	8.28296e-08
1017	6	85038135	85837203	1913	143	2.04263e-05	0.12283	1913	143	0.00715534	0.0124604
1018	6	85837204	86818669					1851	105	0.00103196	0.275126
1019	6	86818670	87516322	1795	121	1.25244e-05	0.210917	1795	121	0.00500758	0.0439114
1020	6	87516323	88499745	1996	115	3.11125e-05	0.030781	1996	115	0.00139592	0.18217
1021	6	88499746	89974267					3070	275	0.00798027	0.0236713
1022	6	89974268	91097024	1876	221	4.64587e-05	0.0208277	1876	221	0.00395165	0.060714
1023	6	91097025	92015279	1685	174	6.69383e-05	0.000866356	1685	174	0.00704533	0.0183639
1024	6	92015280	92953798	1844	167	7.22856e-05	0.00032852	1844	167	0.00709899	0.02151
1025	6	92953799	93696825					1807	147	0.00737759	0.0226065
1026	6	93696826	95176337	3099	230	5.09984e-05	0.0145924	3099	230	0.00614319	0.0312714
1027	6	95176338	96480153	2114	134	2.68556e-05	0.0626891	2114	134	0.0176443	6.50444e-09
1028	6	96480154	98173003	3323	192	6.25274e-05	0.00231991	3323	192	0.00974237	0.00448839
1029	6	98173004	99678876	2402	205	1.64409e-05	0.208588	2402	205	0.0257363	1.0268e-07
1030	6	99678877	100878645	2442	201	0.000135474	2.10485e-08	2442	201	0.00445459	0.0654121
1031	6	100878646	101793542					1747	77	0.00316551	0.0302739
1032	6	101793543	102637706	1341	136	1.34665e-06	0.446126
1033	6	102637707	103612625					1553	89	0.00264081	0.159768
1034	6	103612626	104209796					1679	67	0.00874189	0.00228474
1035	6	104209797	104951344	1475	117	1.46359e-05	0.174111
1036	6	104951345	106053915	1545	153	1.20853e-05	0.24202	1545	153	0.00241232	0.195186
1037	6	106053916	107309327	2852	267	9.30247e-05	0.000201892	2852	267	0.0136715	0.000424201
1038	6	107309328	109043244	2384	236	6.12273e-05	0.00540874	2384	236	0.0147456	0.000230188
1039	6	109043245	110647842					2608	159	0.0105807	0.00379701
1040	6	110647843	111363443	1653	127	1.40125e-05	0.192301	1653	127	0.00827317	0.00649099
1041	6	111363444	112342873	1558	150	4.94727e-05	0.00555765	1558	150	0.0116719	0.000572201
1042	6	112342874	113705003	2299	233	6.29646e-05	0.00424175	2299	233	0.0284738	7.50953e-09
1043	6	113705004	115062811	2384	200	8.27755e-05	0.000172713	2384	200	0.0117686	0.00213837
1044	6	115062812	116132147	2349	121	1.17936e-05	0.223277	2349	121	0.0124464	0.000443433
1045	6	116132148	117674076	3105	200	3.92869e-05	0.034134	3105	200	0.026196	2.8704e-09
1046	6	117674077	118529071	1710	143	4.72791e-05	0.00646068	1710	143	0.0350956	2.03145e-13
1047	6	118529072	119451294	1875	109	3.82726e-05	0.0107217	1875	109	0.0453355	8.73061e-23
1048	6	119451295	120339244	1614	77	3.34248e-05	0.00946157	1614	77	0.00141213	0.266342
1049	6	120339245	121087444	1511	65	1.18157e-05	0.15716	1511	65	0.0102314	0.000410317
1050	6	121087445	121908063	1305	90	3.36022e-05	0.013359	1305	90	0.01061	0.000566448
1051	6	121908064	122929290	1840	94	2.3901e-06	0.4099
1052	6	122929291	123854857	2033	197	0	0.477872	2033	197	0.0195879	6.20974e-06
1053	6	123854858	125365054	2674	285	6.72014e-05	0.00518861	2674	285	0.0478594	1.21148e-16
1054	6	125365055	127545459	2633	231	7.7496e-05	0.000726741	2633	231	0.035814	8.963e-12
1055	6	127545460	128763380	1318	121	3.12675e-05	0.0330247	1318	121	0.0182392	5.37338e-06
1056	6	128763381	129850178	1893	159	0.000120999	3.13215e-08	1893	159	0.0169605	3.44523e-05
1057	6	129850179	130550137	1747	225	0.000120474	9.89247e-07	1747	225	0.012692	0.000789229
1058	6	130550138	131457164	2242	140	3.34516e-05	0.0331456	2242	140	0.0155674	3.73757e-05
1059	6	131457165	132890694	2357	240	0.000106157	1.6409e-05	2357	240	0.0355447	1.316e-11	0.053702	0.750559	0
1060	6	132890695	134313643	2499	214	8.27484e-05	0.000246845	2499	214	0.0246034	1.26408e-07
1061	6	134313644	135544083	2235	257	0.000162184	2.41976e-09	2235	257	0.0132348	0.000268958
1062	6	135544084	137553212	2093	215	2.65766e-05	0.108691	2093	215	0.0109741	0.00147081
1063	6	137553213	138825721	2412	233	0.000124187	7.21335e-07	2412	233	0.0231818	1.23799e-06	0.0823669	0.653509	0
1064	6	138825722	139716713	1721	188	6.52077e-05	0.00151229	1721	188	0.0380952	1.30984e-13
1065	6	139716714	141449453	2779	217	5.39415e-05	0.00930119	2779	217	0.0214358	4.46684e-06
1066	6	141449454	143083347	2559	183	9.32705e-06	0.303755	2559	183	0.00345089	0.0986185
1067	6	143083348	144791455	2786	300	4.54553e-05	0.0404366	2786	300	0.0300994	1.2603e-08
1068	6	144791456	145778282	1805	135	8.55044e-05	9.69807e-06
1069	6	145778283	147015882	1649	121	6.11002e-05	0.000433089	1649	121	0.00332972	0.13603
1070	6	147015883	148184844	2116	219	2.22796e-05	0.149399	2116	219	0.023976	6.28653e-07
1071	6	148184845	149278798	3030	298	9.47836e-05	0.00029083	3030	298	0.0391031	5.67588e-15
1072	6	149278799	150635315	2771	244	5.08204e-06	0.392408	2771	244	0.036636	7.12328e-12
1073	6	150635316	151629954	2935	288	1.87775e-05	0.215553	2935	288	0.0349971	1.37787e-11
1074	6	151629955	152376499	1592	183	4.03454e-05	0.0260639	1592	183	0.02091	5.22049e-06
1075	6	152376500	153082361	1647	197	2.76781e-05	0.0916926	1647	197	0.0173759	3.2393e-05
1076	6	153082362	153791461	1728	153	1.80566e-05	0.157032	1728	153	0.00372881	0.103223
1077	6	153791462	154462010	1610	93	1.6195e-05	0.127472
1078	6	154462011	155523957	2454	295	5.41277e-05	0.0192518	2454	295	0.0391305	1.55016e-13
1079	6	155523958	156762740	2746	271	6.32642e-05	0.00663462	2746	271	0.0180145	2.60648e-05
1080	6	156762741	158220143	2323	284	3.01351e-05	0.110696	2323	284	0.0194723	1.14705e-05
1081	6	158220144	158952060	1907	159	8.04905e-06	0.315276	1907	159	0.021055	3.27776e-07
1082	6	158952061	159604052	1769	158	2.97771e-05	0.0585655	1769	158	0.0154414	0.000161161
1083	6	159604053	160583918	2180	193	6.26306e-05	0.00232957	2180	193	0.0196953	3.73369e-06
1084	6	160583919	161371014	1824	143	1.96473e-05	0.131283	1824	143	0.00769838	0.0131866
1085	6	161371015	162254229	2044	238	8.47266e-06	0.336862	2044	238	0.0167285	8.00493e-06
1086	6	162254230	163336361	2372	186	7.07674e-05	0.000679534	2372	186	0.011073	0.00215007
1087	6	163336362	164687462	3245	297	8.14752e-05	0.00133549	3245	297	0.0288778	6.65324e-09
1088	6	164687463	165835953	3034	215	3.55186e-05	0.0536823	3034	215	0.0251783	7.24955e-08
1089	6	165835954	166853325	2594	264	6.40227e-05	0.00565703	2594	264	0.0286569	6.48933e-11
1090	6	166853326	167714865	1950	201	1.82718e-05	0.183624	1950	201	0.00129218	0.211746
1091	6	167714866	168707338					2037	215	0.0162482	6.81724e-05
1092	6	168707339	169667886	3057	240	3.2852e-05	0.0766159	3057	240	0.0129807	0.00086439
1093	6	169667887	171053405	2299	194	9.67217e-05	1.65267e-05	2299	194	0.00343499	0.0746164
1094	7	15064	617319	342	74	2.99026e-05	0.0155539	342	74	0.00329114	0.0952323
1095	7	617320	1366972					1825	187	0.0210571	9.66577e-07
1096	7	1366973	2473749	2535	233	5.70713e-05	0.00808277	2535	233	0.0194781	2.48058e-06
1097	7	2473750	3100211	1689	262	7.75913e-05	0.00123825	1689	262	0.0274981	5.43708e-08
1098	7	3100212	4139431					2877	253	0.00171491	0.0950011
1099	7	4139432	4938442	2131	265	2.41263e-05	0.152154	2131	265	0.0189863	1.18163e-05
1100	7	4938443	6020653					2661	287	0.0310518	9.8253e-09
1101	7	6020654	6716905	1460	161	6.65372e-06	0.34244	1460	161	0.00864934	0.00348162
1102	7	6716906	7167610	647	67	1.33362e-05	0.134667	647	67	0.00462873	0.0454181
1103	7	7167611	7926500	1971	228	4.94446e-05	0.0166658	1971	228	0.0245555	5.67118e-07
1104	7	7926501	8718351	1935	236	1.27122e-05	0.272877	1935	236	0.0267255	2.15389e-07
1105	7	8718352	9225106	1616	223	2.73854e-05	0.106188	1616	223	0.0164615	0.00010107
1106	7	9225107	9900801	2025	174	1.61156e-05	0.195674	2025	174	0.0193371	7.6425e-06
1107	7	9900802	10481677	1780	164	2.6273e-05	0.0845083	1780	164	0.00268522	0.14816
1108	7	10481678	11232447	2069	150	6.95678e-06	0.331567	2069	150	0.00459401	0.0648824
1109	7	11232448	11855413	1822	218	7.74043e-05	0.00056449	1822	218	0.0151054	0.000129296
1110	7	11855414	12694915	2879	176	1.73422e-05	0.181149	2879	176	0.00399656	0.0793579
1111	7	12694916	13213541	1526	143	2.00065e-06	0.432568	1526	143	0.0126336	0.000899
1112	7	13213542	13676747					1547	157	0.00791733	0.0178631
1113	7	13676748	15013694	2940	304	0.000101943	0.000134053	2940	304	0.0191527	1.16559e-05
1114	7	15013695	15877564					1952	214	0.0204436	5.82989e-06
1115	7	15877565	16739013	2113	206	1.45953e-05	0.233812	2113	206	0.0103023	0.00476785
1116	7	16739014	17596578	2053	278	0.000120345	5.91869e-06	2053	278	0.0189579	2.65072e-05
1117	7	17596579	19131026	2734	298	5.94527e-05	0.0122856	2734	298	0.0287703	1.64761e-10
1118	7	19131027	20122179	2064	157	2.03338e-05	0.133452	2064	157	0.00187145	0.199876
1119	7	20122180	21390644	3074	295	5.18226e-05	0.0234638	3074	295	0.0119793	0.00274075
1120	7	21390645	22165060	2148	286	6.799e-05	0.0048355	2148	286	0.0266797	7.41666e-08
1121	7	22165061	23106680	2174	206	2.52772e-05	0.115168	2174	206	0.010955	0.000412179
1122	7	23106681	24151099					2059	186	0.00323824	0.134242
1123	7	24151100	24894119	1962	177	1.96112e-05	0.154562
1124	7	24894120	25671575	1978	243	5.32973e-05	0.013282	1978	243	0.00768532	0.0161778
1125	7	25671576	27351286	3098	256	2.31476e-05	0.157685	3098	256	0.0289014	1.77814e-08
1126	7	27351287	28890886	3162	299	3.66125e-05	0.0759834	3162	299	0.0284031	2.82615e-09
1127	7	28890887	30175113	3127	277	0.000146587	9.12339e-08	3127	277	0.0171081	7.84326e-05
1128	7	30175114	31730554	2649	267	9.83082e-05	0.000100314	2649	267	0.0292409	4.12886e-08
1129	7	31730555	32460228					1863	178	0.0238102	1.33653e-07
1130	7	32460229	33159277					1554	81	0.00546763	0.0303371
1131	7	33159278	34114532	1482	137	8.2022e-06	0.300555	1482	137	0.00801756	0.0146457
1132	7	34114533	35354135	2376	162	3.36761e-05	0.0414258	2376	162	0.00805366	0.0130002
1133	7	35354136	36507690	2474	219	6.26867e-05	0.00359316	2474	219	0.0271977	3.98225e-09
1134	7	36507691	37981936					3290	288	0.0381517	7.27721e-12
1135	7	37981937	38966483					2819	221	0.0349452	1.94962e-12
1136	7	38966484	40261240					2170	174	0.00274916	0.165214
1137	7	40261241	41415925	1481	145	2.37063e-05	0.0928488	1481	145	0.0062558	0.027724
1138	7	41415926	42494806	2048	221	9.07363e-06	0.322271	2048	221	0.0185086	6.3823e-06
1139	7	42494807	43448815	1749	184	3.36254e-05	0.0505543	1749	184	0.00730152	0.0210164
1140	7	43448816	44989571	2596	228	2.17991e-05	0.158528	2596	228	0.0137623	0.000599409
1141	7	44989572	46247335	3041	218	7.50023e-05	0.000773952	3041	218	0.0139298	0.000529876
1142	7	46247336	47253454	2745	221	0.000108426	6.31521e-06	2745	221	0.0317939	3.05344e-10	0.406964	0.0185385	0
1143	7	47253455	48363585	2562	269	7.91678e-05	0.00115097	2562	269	0.0341355	2.25076e-11
1144	7	48363586	48984625	1758	142	1.21658e-05	0.233343	1758	142	0.0095537	0.00298131
1145	7	48984626	49632426					1828	143	0.00734289	0.013621
1146	7	49632427	50894508	2805	213	5.34477e-05	0.00933657	2805	213	0.00357965	0.0992152
1147	7	50894509	51951647	2151	206	3.76483e-05	0.0416326	2151	206	0.0164962	3.15313e-05
1148	7	51951648	52635123	1753	103	9.75039e-06	0.244634	1753	103	0.00511262	0.0616718
1149	7	52635124	53176523	2212	140	3.80373e-05	0.0195715	2212	140	0.0127251	0.00053044
1150	7	53176524	54086987					2846	142	0.0101047	0.00339953
1151	7	54086988	54550500	1583	69	1.41797e-05	0.124659
1152	7	54550501	55161394	1553	138	4.10347e-05	0.013113	1553	138	0.00304637	0.144727
1153	7	55161395	56303513					2783	203	0.0152567	0.00019764
1154	7	56303514	57383657	1792	72	2.14125e-05	0.0515408
1157	7	63311298	64216135					2112	75	0.00228349	0.127826
1158	7	64216136	65294277	1455	57	9.07978e-06	0.198923
1159	7	65294278	66453993	2026	32	6.54097e-06	0.204811	2026	32	0.00045068	0.336973
1160	7	66453994	66914875					1487	81	0.000610804	0.350188
1161	7	66914876	67474722	1799	145	1.04178e-05	0.264855	1799	145	0.00842666	0.0120019
1162	7	67474723	68569224	3387	259	5.04721e-06	0.395532	3387	259	0.0269735	5.50637e-08
1163	7	68569225	70144614	2367	196	2.77529e-05	0.0907004	2367	196	0.0096943	0.00792461
1164	7	70144615	71215741	2672	236	1.80295e-05	0.203923	2672	236	0.00926534	0.0045558
1165	7	71215742	73128830	2303	188	6.69339e-07	0.46482	2303	188	0.0065658	0.0289071
1166	7	73128831	75243899	1281	188	0.000116634	3.91722e-07	1281	188	0.0206066	1.37097e-06	0.0985652	0.595018	0
1167	7	75243900	76451928					1884	178	0.00557499	0.0486085
1168	7	76451929	77663964	1998	173	1.41274e-05	0.222964	1998	173	0.0103817	0.00273369
1169	7	77663965	78685009	2952	251	8.71216e-05	0.000312794	2952	251	0.00323698	0.0681614
1170	7	78685010	80055721	2040	154	3.50937e-05	0.0328362	2040	154	0.00283492	0.13635
1171	7	80055722	81533566	2313	239	3.3905e-05	0.0704436	2313	239	0.0321496	3.1614e-10
1172	7	81533567	82759283	2313	214	4.86134e-05	0.0156855	2313	214	0.0170298	3.88312e-05
1173	7	82759284	83953009	2674	202	2.6749e-05	0.101238	2674	202	0.0146078	0.000286774
1174	7	83953010	85356715	2037	137	8.16954e-07	0.458209	2037	137	0.00986185	0.00272889
1175	7	85356716	86446538	2140	95	2.26563e-05	0.0636976	2140	95	0.00320528	0.110809
1176	7	86446539	87836641	1940	147	2.1633e-05	0.113271	1940	147	0	0.375154
1177	7	87836642	89330087	3074	202	2.29131e-05	0.134445	3074	202	0.000928006	0.244882
1178	7	89330088	90660831	3115	147	5.81265e-06	0.353075	3115	147	0.00813975	0.0135998
1179	7	90660832	92530165	1731	181	7.16236e-05	0.000529135	1731	181	0.0200074	1.74467e-06
1180	7	92530166	93691725	1763	185	0.000118548	2.32139e-07	1763	185	0.00891972	0.00937042
1181	7	93691726	95174847	1860	192	1.1214e-05	0.276923	1860	192	0.0150338	0.000102924
1182	7	95174848	96564981	2393	210	2.42889e-05	0.125826	2393	210	0.0278935	4.61258e-09
1183	7	96564982	97420207					1555	184	0.0119527	0.000438809
1184	7	97420208	98173564	1438	118	3.54256e-05	0.0188503	1438	118	0.0101619	0.00263775
1185	7	98173565	99465540					1520	152	0.00357018	0.112141
1186	7	99465541	100849307	1860	208	4.01685e-05	0.0336653	1860	208	0.00935985	0.00486359
1187	7	100849308	101950748	2607	233	5.02566e-05	0.0161995	2607	233	0.0243474	2.1388e-07
1188	7	101950749	103191322	1170	94	1.06046e-05	0.219014	1170	94	0.00352659	0.0087478
1189	7	103191323	104109231	2145	178	1.42812e-05	0.22345	2145	178	0.015975	4.65876e-05
1190	7	104109232	105312563	1894	211	3.95041e-05	0.0366657	1894	211	0.0195445	4.18899e-06
1191	7	105312564	106399739	2251	282	6.32253e-05	0.00744826	2251	282	0.0262293	2.32823e-08
1192	7	106399740	107658603	2006	205	6.91708e-05	0.00126982	2006	205	0.0192374	2.2873e-07
1193	7	107658604	109095558	2791	204	7.10877e-05	0.000970799	2791	204	0.0079218	0.00901337
1194	7	109095559	110479479	2634	225	3.81814e-05	0.045805	2634	225	0.0228711	1.65061e-06
1195	7	110479480	111795299					1541	180	0.0136679	0.000681867
1196	7	111795300	113339386					2182	183	0.00584215	0.0566239
1197	7	113339387	115321301	2162	194	1.03141e-05	0.29233	2162	194	0.00988901	0.00511674
1198	7	115321302	116835336					2151	191	0.00491488	0.0521249
1199	7	116835337	118342090					2255	152	0.0158259	4.59137e-05
1200	7	118342091	119568236	1245	54	4.61485e-07	0.45336	1245	54	0.00444039	0.0372523
1201	7	119568237	121042050					1177	99	0	0.463422
1202	7	121042051	121946052					1582	123	0.014897	0.000148529
1203	7	121946053	123859746	3411	225	2.67721e-05	0.111856	3411	225	0.0164091	7.34277e-05
1204	7	123859747	125389586	2930	156	0.000104287	7.85709e-07	2930	156	0.00719861	0.0136276
1205	7	125389587	126640872	2936	133	6.48874e-05	0.000354627	2936	133	0.00510613	0.0539665
1206	7	126640873	127903738	2184	179	0.00010315	2.99205e-06	2184	179	0.00725537	0.0174509
1207	7	127903739	128779173	1921	171	0.000130768	8.99975e-09	1921	171	0.0277347	6.85227e-10	-0.891908	4.18913e-08	1	FLNC	HCM_GWAS,HCM_MTAG,CC_GWAS,DCM_GWAS,CC_MTAG,DCM_MTAG
1208	7	128779174	130418704	2994	255	0.000109872	1.4592e-05	2994	255	0.0166917	4.22863e-05
1209	7	130418705	131856481	2478	280	6.7579e-05	0.00473769	2478	280	0.0465151	4.32539e-16
1210	7	131856482	133807216	2742	240	1.82314e-05	0.203049	2742	240	0.0114623	0.000973005
1211	7	133807217	134943221	2490	194	2.6691e-05	0.0975735	2490	194	0.0119697	0.00100024
1212	7	134943222	136113467	2519	230	2.07942e-05	0.169848	2519	230	0.0162918	0.000141717
1213	7	136113468	137657459	2395	217	7.2384e-05	0.00106238	2395	217	0.0236002	1.36605e-06
1214	7	137657460	138755107	1969	272	8.67003e-05	0.000493383	1969	272	0.0116742	0.00188106
1215	7	138755108	140217630	2062	279	4.76644e-05	0.0297597	2062	279	0.037085	1.90969e-13
1216	7	140217631	142098979	2505	224	6.6241e-05	0.0025701	2505	224	0.014619	0.0003255
1217	7	142098980	144324464	1946	173	9.44908e-06	0.297407	1946	173	0.0193433	3.26325e-06
1218	7	144324465	145415775	2372	183	6.93725e-05	0.000768147	2372	183	0.0105398	0.00502855
1219	7	145415776	146574327	1924	147	2.94344e-05	0.0547287	1924	147	0.0107423	0.00281849
1220	7	146574328	147352171	1793	125	2.23631e-05	0.0904898	1793	125	0.00691885	0.0252022
1221	7	147352172	148622913	3041	265	8.537e-05	0.000510581	3041	265	0.01272	0.000453406
1222	7	148622914	149842999	1670	185	3.13007e-05	0.0628601	1670	185	0.00838515	0.00877791
1223	7	149843000	150897818	2210	215	5.57194e-05	0.00747949	2210	215	0.0259504	4.14396e-08
1224	7	150897819	152253294	1964	291	0.00013948	4.75659e-07	1964	291	0.0414982	5.27498e-13	-0.0959077	0.525167	0
1225	7	152253295	153241228	2553	257	8.72305e-05	0.000349097	2553	257	0.00698241	0.0247923
1226	7	153241229	154407487	1844	239	1.69101e-05	0.218606	1844	239	0.021086	2.74367e-06
1227	7	154407488	155280610	2560	297	0.000110964	3.6131e-05	2560	297	0.013969	0.000425533
1228	7	155280611	156344386	2478	295	8.87722e-05	0.000567378	2478	295	0.025979	2.32186e-07
1229	7	156344387	157199331	2002	192	4.70346e-05	0.0143479	2002	192	0.00862851	0.00754752
1230	7	157199332	158031247	2077	256	8.62848e-05	0.000389444	2077	256	0.0108137	0.00381459
1231	7	158031248	159128566	1963	177	3.55443e-05	0.0396984	1963	177	0.00791134	0.0175859
1232	8	11740	660414					1330	186	0.013072	0.00056481
1233	8	660415	1161824	1491	209	5.58981e-05	0.0068023	1491	209	0.00560218	0.0309469
1234	8	1161825	1628039	1542	225	5.35338e-05	0.0107122	1542	225	0.019253	1.01596e-05
1235	8	1628040	2070902	1495	289	9.47052e-05	0.000249499	1495	289	0.0274634	2.10891e-10
1236	8	2070903	2396122					784	117	0.00903709	0.00592322
1237	8	2396123	2970491	1866	259	1.13161e-05	0.300485	1866	259	0.0335246	1.48148e-10
1238	8	2970492	3386667					2154	230	0.0206116	5.97452e-06
1239	8	3386668	3787248					2239	253	0.00587671	0.0207436
1240	8	3787249	4273083					2499	296	0.00806306	0.00617518
1241	8	4273084	4893120	2485	308	5.42816e-05	0.0208304	2485	308	0.00827482	0.00123424
1242	8	4893121	5566269	2779	262	4.55674e-05	0.0315119	2779	262	0.0188964	4.18416e-05
1243	8	5566270	6019163	2098	198	2.02701e-05	0.159431	2098	198	0.0102555	0.00461371
1244	8	6019164	6663427	2312	271	6.26193e-05	0.00706136	2312	271	0.0345684	3.98177e-10
1245	8	6663428	8064600	877	178	5.47128e-05	0.00480776	877	178	0.00244368	0.155445
1246	8	8064601	8589770					1515	168	0.0185438	1.7104e-05
1247	8	8589771	9167795	1693	210	9.22616e-05	5.52663e-05	1693	210	0.0137388	0.000571443
1248	8	9167796	9835863	1786	162	1.14685e-05	0.257459	1786	162	0.00747239	0.0138235
1249	8	9835864	10478851	1877	231	3.03567e-05	0.0886213	1877	231	0.00147331	0.173661
1250	8	10478852	11466761	2466	244	3.26703e-05	0.0792888	2466	244	0.0187372	8.63186e-06
1251	8	11466762	12296849					1140	167	0.0110316	0.00360829
1252	8	12296850	12947935					1096	130	0.0155188	3.15251e-05
1253	8	12947936	13395051	1575	135	9.64728e-06	0.272387	1575	135	0.00109162	0.260523
1255	8	13948096	14389305	1549	136	4.64309e-06	0.373105	1549	136	0.00462034	0.0659962
1256	8	14389306	14872767	1727	162	2.66812e-05	0.0802313	1727	162	0.012019	0.00131146
1257	8	14872768	15359692					1776	176	0.000517857	0.229797
1258	8	15359693	15999328	2030	199	2.35243e-05	0.127143	2030	199	0.00684175	0.0354239
1259	8	15999329	16988030					1745	194	0.00857811	0.0135367
1260	8	16988031	17492672					1489	221	0.0135462	0.000693134
1261	8	17492673	17947004					1469	139	0.00546756	0.0451155
1262	8	17947005	18668609					2278	225	0.021288	7.79941e-07
1263	8	18668610	19488888	2488	276	2.70808e-05	0.130718
1264	8	19488889	20135628	1862	236	3.72771e-05	0.0529662	1862	236	0.0131561	0.000270005
1265	8	20135629	20812107	1733	186	2.12732e-05	0.141913	1733	186	0.00328769	0.107123
1266	8	20812108	21650453					1956	233	0.0149096	0.000607845
1267	8	21650454	22895018	2298	288	0.000147265	1.21454e-07	2298	288	0.0397922	4.6171e-14	-0.0377381	0.795277	0
1268	8	22895019	23788494	2474	250	4.51343e-05	0.0300653	2474	250	0.0225954	2.91735e-06
1269	8	23788495	24863243	1631	167	5.05282e-05	0.00664731	1631	167	0.0131872	0.000604491
1270	8	24863244	25859277	2001	213	1.34407e-05	0.253226	2001	213	0.040925	3.71231e-14
1271	8	25859278	26679135	2459	225	5.59374e-05	0.00830669	2459	225	0.0163149	3.31622e-05
1272	8	26679136	27406511	2077	162	4.85067e-05	0.00783232	2077	162	0.0219691	2.29607e-07
1273	8	27406512	28344176	2162	222	4.72553e-05	0.019464	2162	222	0.0207644	1.28473e-06
1274	8	28344177	29744540	2011	221	7.7288e-05	0.000610291	2011	221	0.0122346	0.00111627
1275	8	29744541	31134786					2078	191	0.0113264	0.00209564
1276	8	31134787	32454962	3054	200	9.26965e-05	3.78227e-05	3054	200	0.0154291	0.000115279
1277	8	32454963	33982537	2284	175	9.83883e-05	5.89654e-06	2284	175	0.0316353	3.41953e-11	-0.605733	0.000453528	1
1278	8	33982538	34792220	1426	71	8.7926e-06	0.227952	1426	71	0.00256321	0.157933
1279	8	34792221	36641174					1530	133	0.0115657	0.00150515
1280	8	36641175	38803980	2574	294	0.000103892	8.58902e-05	2574	294	0.0219898	5.51988e-07
1281	8	38803981	40179577	2555	203	2.94186e-05	0.0825772	2555	203	0.0248029	7.78087e-08
1282	8	40179578	40974254	2242	183	5.95616e-06	0.363232	2242	183	0.00436006	0.0804369
1283	8	40974255	41725002	1880	203	1.50876e-05	0.225577	1880	203	0.0245492	3.34956e-08
1284	8	41725003	43825633					1603	89	0.00449063	0.0394433
1285	8	43825634	49044813	452	24	3.92538e-06	0.268709	452	24	0.00452941	0.0153623
1286	8	49044814	50288660	1669	102	1.34919e-05	0.176983	1669	102	0.0062484	0.0244965
1287	8	50288661	51461455					562	30	0.00113847	0.243646
1288	8	51461456	52326236	1587	61	1.05975e-05	0.173511
1289	8	52326237	53108910	1191	86	2.03166e-05	0.0744006	1191	86	0.00187467	0.217853
1290	8	53108911	54119373	1512	98	1.58986e-05	0.137086	1512	98	0	0.420438
1291	8	54119374	55275354	1608	135	4.21496e-05	0.0108223	1608	135	0.00711312	0.01661
1292	8	55275355	56346878	1924	191	1.27155e-05	0.253677	1924	191	0.0137289	0.000596724
1293	8	56346879	57436722	2379	188	3.72001e-05	0.0373998	2379	188	0.00592206	0.024487
1294	8	57436723	58675117	2957	196	7.13764e-05	0.000784406	2957	196	0.0149465	0.000120557
1295	8	58675118	59555977					1941	187	0.00936086	0.00874546
1296	8	59555978	60476248	1298	157	2.57746e-05	0.0841874	1298	157	0.00649176	0.0382126
1297	8	60476249	61324889					916	86	0.00271503	0.141197
1298	8	61324890	62330900	1540	167	1.33187e-05	0.231209	1540	167	0.00384601	0.0838327
1299	8	62330901	63253462	2005	129	5.32653e-05	0.00197868	2005	129	0.00376988	0.0643208
1300	8	63253463	64215358	2206	135	3.45555e-05	0.0273896	2206	135	0.000849117	0.288138
1301	8	64215359	66018204	2561	207	3.31068e-05	0.0624032	2561	207	0.0161386	2.806e-05
1302	8	66018205	66960438	1725	129	3.20249e-06	0.402205	1725	129	0.00673651	0.0261316
1303	8	66960439	68683823	1823	192	2.58721e-05	0.10308	1823	192	0.0188753	7.1751e-06
1304	8	68683824	70004665	2796	271	9.98778e-05	8.90941e-05	2796	271	0.00320257	0.0764169
1305	8	70004666	70872088	1679	203	8.01235e-05	0.000274466	1679	203	0.0112508	0.00235744
1306	8	70872089	72013184	1968	124	1.05392e-05	0.247938	1968	124	0.0142123	0.000142082
1307	8	72013185	72917489	2002	252	4.76735e-05	0.0244068	2002	252	0.0424361	3.14676e-14
1308	8	72917490	73838027	1709	150	4.82993e-06	0.374201	1709	150	0.020415	8.14136e-07
1309	8	73838028	75011699	2245	238	3.02764e-05	0.0918807	2245	238	0.0185681	2.30212e-05
1310	8	75011700	76295483	2666	209	1.27186e-05	0.262	2666	209	0.0151039	0.000188155
1311	8	76295484	77377989	2445	130	4.33089e-05	0.00839624	2445	130	0.00464526	0.0264837
1312	8	77377990	78633659	2249	137	2.07582e-05	0.114887	2249	137	0.0106735	0.00323363
1313	8	78633660	79756169	2201	93	6.7689e-06	0.299542	2201	93	0.0064075	0.0180186
1314	8	79756170	81340231	2960	230	4.00537e-05	0.0404102	2960	230	0.033528	8.29282e-11
1315	8	81340232	82878769	2417	220	0.000104586	1.11702e-05	2417	220	0.0179343	3.61901e-05
1316	8	82878770	83730337	1939	126	6.66565e-06	0.325386	1939	126	0.0077235	0.0140928
1317	8	83730338	85116734	3104	148	4.63561e-05	0.00803269	3104	148	0.0161191	1.54099e-05
1318	8	85116735	86251870	1637	97	1.26675e-05	0.185097
1319	8	86251871	87563145					1547	108	0.0059622	0.036936
1320	8	87563146	89081177	2886	204	1.13869e-05	0.279623	2886	204	0.0195129	1.58792e-05
1321	8	89081178	90364149	2583	144	1.14506e-05	0.246511	2583	144	0.00125171	0.224046
1322	8	90364150	91457962	1761	153	2.70602e-05	0.0725887	1761	153	0.00069755	0.290269
1323	8	91457963	92876620					1842	128	0.00661689	0.0140686
1324	8	92876621	94999066	2878	245	0.000113188	6.52444e-06	2878	245	0.042849	8.03539e-14	0.21275	0.183163	0
1325	8	94999067	96175630	2572	190	4.96464e-05	0.0105149	2572	190	0.0274163	2.2099e-09
1326	8	96175631	96900513	1882	236	7.13084e-05	0.00170688	1882	236	0.00568281	0.032827
1327	8	96900514	98132519	1962	216	2.14403e-06	0.438995	1962	216	0.0219917	1.24135e-06
1328	8	98132520	99388944	2224	235	0.000112388	5.38588e-06	2224	235	0.0149374	9.69335e-05
1329	8	99388945	101448439	1646	81	2.52201e-05	0.0362896	1646	81	0.000224725	0.404885
1330	8	101448440	102548680	1883	258	0.000103396	4.05003e-05	1883	258	0.0231922	1.08991e-06
1331	8	102548681	103716053					2218	237	0.0183767	1.115e-05
1332	8	103716054	104467845					1820	192	0.0307002	7.23612e-10
1333	8	104467846	105370130	2161	77	1.99795e-05	0.0680706	2161	77	0.000347796	0.371586
1334	8	105370131	106500950	1973	201	1.07859e-06	0.457494	1973	201	0.00354826	0.0940161
1335	8	106500951	107787163	2146	188	2.22752e-05	0.132998	2146	188	0.0139381	0.000631866
1336	8	107787164	108647463	1975	162	3.892e-05	0.0238861	1975	162	0.0112527	0.00145321
1337	8	108647464	109920827	2594	178	7.26904e-06	0.337855	2594	178	0.00782485	0.0102178
1338	8	109920828	111207349					1993	153	0.00461594	0.0577605
1339	8	111207350	112601513					708	59	0.00470721	0.033371
1341	8	113650854	114781574					1849	65	0.00222156	0.176564
1342	8	114781575	115334858	1420	102	3.16504e-06	0.393263	1420	102	0.0139429	5.82612e-05
1343	8	115334859	116094203	1583	77	1.18741e-05	0.174305	1583	77	0.0103481	0.000790133
1344	8	116094204	118300068	2685	243	2.13584e-05	0.170001	2685	243	0.00939581	0.00791916
1345	8	118300069	119423298	1945	219	5.75579e-05	0.00645	1945	219	0.00424072	0.0926149
1346	8	119423299	120216587	1770	158	4.23963e-05	0.015301	1770	158	0.0146832	0.00035666
1347	8	120216588	121554390	2521	179	5.93248e-05	0.00272282	2521	179	0.0134272	0.000723537
1348	8	121554391	122622804	1851	191	4.00675e-05	0.0291102	1851	191	0.00987454	0.00347691
1349	8	122622805	124001019	2333	252	7.66261e-05	0.00118032	2333	252	0.0262696	4.13979e-08
1350	8	124001020	125453322	2770	267	9.04945e-05	0.000278415	2770	267	0.0307455	1.23499e-10
1351	8	125453323	126766827	2474	252	0.000258434	1.69805e-18	2474	252	0.0618015	2.04453e-26	-0.446652	1.53696e-05	1	MTSS1	HCM_MTAG,DCM_GWAS,DCM_MTAG,HCM_GWAS,CC_GWAS,CC_MTAG
1352	8	126766828	128073654	2790	257	0.000127172	1.06877e-06	2790	257	0.0278569	7.11154e-09	0.332964	0.0500357	0
1353	8	128073655	129291118	2824	326	0.000120049	2.03142e-05	2824	326	0.0212759	6.26024e-08	0.0909197	0.619001	0
1354	8	129291119	130383563	2232	157	2.06007e-05	0.130718	2232	157	0.01243	0.000996438
1355	8	130383564	131545725					2512	195	0.00956085	0.00789653
1356	8	131545726	132534636					2230	199	0.0176979	2.64602e-05
1357	8	132534637	133461551					2172	192	0.00913544	0.00756742
1358	8	133461552	134509448	2449	266	6.22866e-05	0.00686386	2449	266	0.0237426	1.86585e-07
1359	8	134509449	135313673	2215	237	5.89673e-05	0.00695401	2215	237	0.0149109	0.000182304
1360	8	135313674	136220342	1920	192	1.84575e-05	0.176711	1920	192	0.00146014	0.200337
1361	8	136220343	137527617	2571	165	2.08314e-05	0.133745	2571	165	0.0261556	3.29306e-08
1362	8	137527618	138564843	2010	151	4.71932e-05	0.00761029	2010	151	0.00410035	0.0559546
1363	8	138564844	139404631	2102	226	0.000113384	3.35436e-06	2102	226	0.0195784	8.30391e-06	0.130374	0.507134	0
1364	8	139404632	140355988	1751	205	0	0.47962	1751	205	0.0145415	0.000531209
1365	8	140355989	141527881	2414	272	5.05544e-05	0.0221238	2414	272	0.0320444	7.39658e-10
1366	8	141527882	142611889	2177	248	9.9703e-05	5.2936e-05	2177	248	0.0140776	0.00103906
1367	8	142611890	143611461	2177	237	5.13096e-05	0.0152137	2177	237	0.0169493	5.89746e-05
1368	8	143611462	144934288	2863	242	1.34972e-06	0.455127	2863	242	0.0195349	1.28308e-05
1369	8	144934289	146303787	1055	143	8.78204e-06	0.293441	1055	143	0.0124717	0.00102744
1370	9	10469	653661	1355	155	1.96517e-05	0.139779	1355	155	0.00764546	0.0197141
1371	9	653662	1103598	1297	209	5.44894e-05	0.0079125	1297	209	0.0123573	0.002285
1372	9	1103599	1874961	2170	240	0	0.486996	2170	240	0.0253604	1.62222e-08
1373	9	1874962	2441120	1350	228	7.20855e-05	0.00135088	1350	228	0.0130663	0.00074155
1374	9	2441121	3079045	1586	247	1.81811e-05	0.206849	1586	247	0.0195474	5.84696e-06
1375	9	3079046	4025355	1792	268	0.000134046	5.15727e-07	1792	268	0.0316915	4.84133e-11	0.108621	0.491487	0
1376	9	4025356	4596614	1610	264	5.79852e-05	0.0103486	1610	264	0.0119077	0.000504795
1377	9	4596615	5437591	1802	218	1.3399e-05	0.255919	1802	218	0.029201	3.19623e-09
1378	9	5437592	6859791	2791	272	4.14704e-05	0.0469373	2791	272	0.00854456	0.00760315
1379	9	6859792	7388202					1849	205	0.0105284	0.00497787
1380	9	7388203	8262303	2367	281	5.95578e-05	0.0104943	2367	281	0.0245848	1.85838e-07
1381	9	8262304	9170120	2503	280	6.60445e-05	0.00550636	2503	280	0.0355129	1.26116e-15
1382	9	9170121	9920258	2022	231	2.29887e-05	0.148117	2022	231	0.00286612	0.0983804
1383	9	9920259	10675474					2185	231	0.00866977	0.00760314
1384	9	10675475	11270764	1633	134	1.11846e-05	0.244085	1633	134	0.00615329	0.0447586
1385	9	11270765	12044915	2030	72	0	0.474164	2030	72	0.00233755	0.164975
1386	9	12044916	12664858	1294	129	3.8544e-05	0.0153671	1294	129	0.00967652	0.00372895
1387	9	12664859	13512852	1316	199	7.11721e-05	0.000862177	1316	199	0.00684111	0.0247303
1388	9	13512853	14244747	1321	197	9.21937e-05	3.75635e-05	1321	197	0.0129325	0.000641952
1389	9	14244748	14902924	1494	257	8.65187e-05	0.000381251	1494	257	0.0169178	5.71419e-05
1390	9	14902925	15839403					1804	202	0.0106021	0.00436543
1391	9	15839404	16658377	1545	231	1.33199e-05	0.262106	1545	231	0.0186164	2.29424e-05
1392	9	16658378	17392382					1380	98	0.000209169	0.392816
1393	9	17392383	17990565					837	119	0.0066484	0.0242739
1394	9	17990566	18754196	1945	228	3.73139e-05	0.0501981	1945	228	0.0221695	1.87023e-06
1395	9	18754197	19463292	1819	211	1.68895e-06	0.446964	1819	211	0.00173479	0.153029
1396	9	19463293	20483880	1831	245	4.79524e-05	0.0224032	1831	245	0.0123663	0.00228236
1397	9	20483881	21674032	2371	217	5.79835e-05	0.00596438	2371	217	0.00922635	0.0100429
1398	9	21674033	23091193	2443	239	8.05652e-06	0.343596	2443	239	0.00899654	0.00959033
1399	9	23091194	23859374	1245	201	8.20303e-05	0.000197501	1245	201	0.0151504	0.000339612
1400	9	23859375	24757729	1684	201	4.71648e-05	0.0157705	1684	201	0.000995378	0.212171
1401	9	24757730	25957606	2471	244	9.49003e-05	9.44927e-05	2471	244	0.0210243	7.98329e-07
1402	9	25957607	26747214	1197	148	4.72497e-05	0.00712848	1197	148	0.00401972	0.0907556
1403	9	26747215	27366479	1533	172	2.16889e-05	0.129288	1533	172	0	0.429309
1404	9	27366480	28067454	1546	188	9.83046e-06	0.297522	1546	188	0.00521867	0.0550951
1405	9	28067455	28766060	1730	217	2.43414e-05	0.128584	1730	217	0.0286982	5.26834e-09
1406	9	28766061	29596501	2556	142	1.67805e-05	0.165073	2556	142	0.00375546	0.111952
1407	9	29596502	30410078	1666	125	2.8683e-05	0.046812	1666	125	0.00581771	0.0332739
1408	9	30410079	31115153					990	71	0.00672382	0.010926
1409	9	31115154	32253283	3191	130	2.50147e-05	0.0727058	3191	130	0.018384	5.07007e-06
1410	9	32253284	33194892	2138	200	1.87173e-05	0.178121	2138	200	0.0139232	0.000189987
1411	9	33194893	34704544	2743	198	6.88338e-05	0.00115112	2743	198	0.0167545	0.000112035
1412	9	34704545	36749273	3031	289	0.000142903	2.55785e-07	3031	289	0.01347	0.000165075
1413	9	36749274	37687112	1896	234	1.4147e-05	0.252328	1896	234	0.0190052	2.72272e-05
1414	9	37687113	38822977	2065	249	2.88861e-05	0.106026	2065	249	0.0173961	3.52372e-05
1418	9	70939678	72288878	2151	206	2.99948e-05	0.0800697	2151	206	0.0198856	1.36563e-06
1419	9	72288879	73915494	3422	214	3.57216e-06	0.413335	3422	214	0.0152245	0.000374929
1420	9	73915495	74950318	1745	223	4.4775e-05	0.0249111	1745	223	0.0310247	3.40021e-09
1421	9	74950319	76197744	2086	141	8.70205e-06	0.293692	2086	141	0.00696181	0.0266054
1422	9	76197745	77862308	2841	231	3.5504e-05	0.0594419	2841	231	0.0129557	0.00117332
1423	9	77862309	78630915	2051	217	4.88665e-05	0.0157531	2051	217	0.0220558	2.01251e-06
1424	9	78630916	79451035	2047	275	5.9355e-05	0.0101378	2047	275	0.0219142	9.40084e-07
1425	9	79451036	80137024	1664	176	3.75347e-05	0.0322682	1664	176	0.0189403	9.25367e-06
1427	9	81161598	82601465	2603	302	4.06382e-05	0.0580895	2603	302	0.00937853	0.00660546
1428	9	82601466	83455502	2408	164	6.6101e-06	0.344606	2408	164	0.00672031	0.0178224
1429	9	83455503	85135751	2481	261	0.000135857	2.99269e-07	2481	261	0.0417955	2.23408e-13	-0.0221777	0.882077	0
1430	9	85135752	86769886	3206	285	3.50878e-05	0.0797376	3206	285	0.00982067	0.00442825
1431	9	86769887	87815449	2251	198	2.8681e-05	0.0850085	2251	198	0.0279464	5.88961e-09
1432	9	87815450	89171796	1863	172	8.7093e-05	3.63401e-05	1863	172	0.00532444	0.0511815
1433	9	89171797	90135154	2215	237	1.56466e-05	0.23362	2215	237	0	0.238072
1434	9	90135155	90890979	1728	181	1.96119e-05	0.156732	1728	181	0	0.370732
1435	9	90890980	91643255	1292	118	3.85844e-05	0.0124706
1436	9	91643256	92500277	1709	181	3.31483e-06	0.412524	1709	181	0.0159256	3.66411e-05
1437	9	92500278	93441050					1871	161	0.0108861	0.00271666
1438	9	93441051	94175374	1674	190	7.13645e-05	0.000684794	1674	190	0.0144308	0.000130512
1439	9	94175375	94924482	1240	107	7.69268e-06	0.29034	1240	107	0.0152244	6.27424e-07
1440	9	94924483	95854925					1810	114	0.00703743	0.0218853
1441	9	95854926	96670171					2051	151	0.0064187	0.0263264
1442	9	96670172	97418633	1511	126	1.54567e-05	0.16959	1511	126	0.0063139	0.0189947
1443	9	97418634	98885862	2447	221	2.6639e-06	0.430527	2447	221	0.0267047	2.36143e-08
1444	9	98885863	100310517	1665	160	3.63373e-05	0.030766	1665	160	0.0161405	0.00014227
1445	9	100310518	101596750	2705	261	2.71732e-05	0.124149	2705	261	0.0112059	0.00116452
1446	9	101596751	103165725	2134	205	2.32647e-05	0.132549	2134	205	0.0312838	5.44866e-10
1447	9	103165726	104222848	1801	141	2.72761e-05	0.0640746	1801	141	0.00852712	0.00968999
1448	9	104222849	105043411	1949	168	2.30188e-05	0.113981	1949	168	0.011717	0.00228093
1449	9	105043412	105846545	2430	156	2.2081e-05	0.115219	2430	156	0.00815979	0.0125054
1450	9	105846546	107061019					3062	176	0.0162823	6.52068e-05
1451	9	107061020	108203095	2581	241	0.000102209	3.05653e-05	2581	241	0.0224312	8.73118e-07
1452	9	108203096	109150717					1394	136	0.00974357	0.0028378
1453	9	109150718	110630150	3006	303	1.11495e-05	0.314626	3006	303	0.0289944	9.2471e-09
1454	9	110630151	111368107	1653	173	1.87754e-05	0.161635	1653	173	0.0123226	0.0002907
1455	9	111368108	112076381	1730	147	2.60074e-05	0.0763769	1730	147	0.00916795	0.008582
1456	9	112076382	112865520	2023	219	1.48363e-06	0.451334	2023	219	0.0123151	0.000432326
1457	9	112865521	113646149	2116	223	4.95401e-05	0.015698	2116	223	0.0230078	1.80525e-07
1458	9	113646150	114443475	1749	182	6.72964e-06	0.348595	1749	182	0.0120473	0.00069259
1459	9	114443476	115390112	2048	155	2.10996e-05	0.124327	2048	155	0.000519468	0.307456
1460	9	115390113	116159540	1420	175	1.70721e-05	0.183698	1420	175	0.00752403	0.017059
1461	9	116159541	117054909	2036	259	9.38592e-05	0.00015262	2036	259	0.0203799	7.36423e-06
1462	9	117054910	117989017	2094	224	2.27343e-05	0.147172	2094	224	0.00492557	0.054001
1463	9	117989018	119001227	1881	144	5.58317e-06	0.35661	1881	144	0	0.407728
1464	9	119001228	119890464	1909	221	3.18553e-05	0.0749066	1909	221	0.0086473	0.00896053
1465	9	119890465	121008529					2298	231	0.00436986	0.061762
1466	9	121008530	122677719	2834	240	6.74786e-05	0.00284464	2834	240	0.0308354	7.67184e-10
1467	9	122677720	124119883	1593	184	3.24226e-05	0.056314	1593	184	0.0160199	4.42961e-05
1468	9	124119884	125137578	1732	228	1.85656e-05	0.193829	1732	228	0.0233016	5.13305e-07
1469	9	125137579	126092931	1360	164	1.49482e-05	0.205649
1470	9	126092932	127184582	1965	202	2.5065e-05	0.114709	1965	202	0.0316165	2.19936e-10
1471	9	127184583	128785782	1557	146	4.87415e-05	0.00564057	1557	146	0.00252801	0.159837
1472	9	128785783	129617771	1815	264	9.87813e-05	8.78115e-05	1815	264	0.0197018	2.67544e-05
1473	9	129617772	130902727	1374	148	7.82375e-05	6.5282e-05	1374	148	0.013633	0.000178025
1474	9	130902728	132193798	1170	144	2.78339e-06	0.415571	1170	144	0.00221253	0.182762
1475	9	132193799	132999452					2086	221	0.0137373	0.000606503
1476	9	132999453	134141936	1925	285	6.33074e-07	0.467916	1925	285	0.0241254	8.40463e-07
1477	9	134141937	135135887	1687	233	2.34375e-05	0.14468	1687	233	0.0405708	3.79549e-14
1478	9	135135888	136042490	1825	256	9.80219e-05	8.14825e-05	1825	256	0.0193258	1.21597e-05
1479	9	136042491	136770926	2083	245	5.5138e-05	0.0113271	2083	245	0.0304562	7.07535e-09
1480	9	136770927	137593527	1500	208	3.87604e-05	0.0383914	1500	208	0.0319823	9.03454e-11
1481	9	137593528	138202112	1980	295	0.000132696	1.54264e-06	1980	295	0.0204258	6.88333e-06	-0.120844	0.523589	0
1482	9	138202113	138995791	1593	252	0.000158967	3.46811e-09	1593	252	0.0317392	6.67996e-10	0.114861	0.449611	0
1483	9	138995792	140097759	1860	239	7.47012e-05	0.00120173	1860	239	0.015928	0.000364412
1484	9	140097760	141146682	909	168	4.47828e-05	0.0134644	909	168	0.0252911	1.36407e-07
1485	10	60515	1329232					1921	204	0	0.464047
1486	10	1329233	1872960	1488	229	2.04413e-05	0.173289	1488	229	0.0239442	7.09776e-07
1487	10	1872961	2637065	2708	215	7.36257e-05	0.000869649	2708	215	0	0.374429
1488	10	2637066	3225336	1624	216	9.57305e-05	3.91331e-05	1624	216	0.0148364	0.000316398
1489	10	3225337	3880322	1491	186	8.82014e-05	4.95689e-05	1491	186	0.022645	1.9257e-07
1490	10	3880323	4813182	2012	240	5.13943e-05	0.0155412	2012	240	0.0378881	2.20605e-12
1491	10	4813183	5396242					2129	162	0.0143696	0.000132228
1492	10	5396243	6234718	2212	276	8.71256e-05	0.000503102	2212	276	0.0150528	9.16004e-05
1493	10	6234719	6897037	1472	237	7.4146e-05	0.0012284	1472	237	0.02097	7.74521e-06
1494	10	6897038	7659872	2081	258	8.99911e-05	0.000248439	2081	258	0.00979411	0.0055284
1495	10	7659873	8771920	3056	284	5.79004e-05	0.0125775	3056	284	0.020094	9.90794e-06
1496	10	8771921	10081279					2749	202	0.0207166	1.18551e-06
1497	10	10081280	10969481	2022	223	6.15101e-05	0.00437199	2022	223	0.0143078	0.000233152
1498	10	10969482	11856924	2033	264	1.13688e-05	0.301481	2033	264	0.0171983	9.44866e-06
1499	10	11856925	12581571	1763	232	0.000133232	1.45913e-07	1763	232	0.0109069	0.00283877
1500	10	12581572	13208061	1661	252	1.41121e-05	0.259394	1661	252	0.0221251	4.3781e-06
1501	10	13208062	14008135	2155	296	7.78916e-05	0.00194705	2155	296	0.0153972	1.8555e-05
1502	10	14008136	14820755	2330	249	4.37931e-05	0.0335067	2330	249	0.0158004	0.000291792
1503	10	14820756	15946677	2344	253	1.90849e-06	0.446312	2344	253	0.0183304	2.52971e-05
1504	10	15946678	17065860	1915	200	3.22442e-05	0.064192	1915	200	0.014795	0.000454247
1505	10	17065861	18529742	2425	229	2.00052e-05	0.177854	2425	229	0.0129478	0.000600832
1506	10	18529743	19421514	2415	188	5.3857e-05	0.00626609	2415	188	0.0133496	0.00102186
1507	10	19421515	19965624					1553	94	0.000507328	0.353814
1508	10	19965625	20616432					1711	160	0.00776647	0.0179312
1509	10	20616433	21477692	1797	168	4.74293e-05	0.00979076	1797	168	0.0116397	0.0009313
1510	10	21477693	23365685	1885	191	4.75509e-05	0.0134079	1885	191	0.00987214	0.00563279
1511	10	23365686	24489447	1467	154	1.12612e-05	0.255929	1467	154	0.0259598	1.0304e-09
1512	10	24489448	25577761	1885	248	3.12709e-05	0.0895636	1885	248	0.0148244	0.000502071
1513	10	25577762	26161974	1529	137	2.44758e-05	0.0815116	1529	137	0.000542054	0.315674
1514	10	26161975	26888716	1951	123	1.02954e-05	0.251752	1951	123	0.00964989	0.00408496
1515	10	26888717	27669566					1982	131	0	0.443448
1516	10	27669567	28734422					2359	192	0.0111932	0.00178608
1517	10	28734423	29393749	1518	173	2.27447e-05	0.119626	1518	173	0.0207006	2.58425e-06
1518	10	29393750	30000223	1816	211	0.000115257	1.39129e-06	1816	211	0.017392	5.18798e-05
1519	10	30000224	30919469	1888	212	8.68783e-05	0.000130551	1888	212	0.00795152	0.0109987
1520	10	30919470	32457293	2637	214	3.96818e-05	0.0369103	2637	214	0.00987268	0.00630248
1521	10	32457294	33655458	2951	162	6.90892e-05	0.000460505	2951	162	0.0200751	2.38363e-06
1522	10	33655459	35178224	2780	270	7.59844e-05	0.00168138	2780	270	0.00679516	0.0198455
1523	10	35178225	36475838					2127	184	0.0139669	0.000464413
1524	10	36475839	37561443	2012	163	4.20536e-05	0.0170936	2012	163	0.00938611	0.00856888
1525	10	37561444	38566460	1387	35	2.42086e-06	0.360164	1387	35	0.00235675	0.123251
1526	10	38566461	42392742	54	4	1.22994e-06	0.269396	54	4	0.00122266	0.0747783
1527	10	42392743	42984427	253	16	4.67078e-06	0.198951	253	16	0.00216337	0.0649922
1528	10	42984428	43769842					2006	115	0.00842858	0.00621556
1529	10	43769843	44893846	3096	201	3.95738e-05	0.0335331	3096	201	0.0155312	0.000297621
1530	10	44893847	46327144	2805	188	6.86092e-05	0.000958431	2805	188	0.00059492	0.236402
1531	10	46327145	49197320					56	9	0.000512638	0.267569
1532	10	49197321	50145673	1582	173	6.33446e-05	0.0013981	1582	173	0.0200344	3.65783e-06
1533	10	50145674	51724039	1973	168	8.26863e-05	6.52206e-05	1973	168	0.0259118	4.78422e-09
1534	10	51724040	53129609	1955	205	6.29356e-05	0.00278094	1955	205	0.00760154	0.0248699
1535	10	53129610	53919161	2080	203	1.35221e-07	0.475389	2080	203	0.0194564	1.0923e-05
1536	10	53919162	55104428	2574	231	6.17464e-05	0.00477741	2574	231	0.02588	6.73475e-08
1537	10	55104429	55867694	2088	151	6.52843e-05	0.000587515	2088	151	0.00501841	0.0408289
1538	10	55867695	57044845	3206	235	7.54434e-05	0.0010171	3206	235	0.0214121	3.58148e-07
1539	10	57044846	57955671					1983	109	0.00632068	0.0232047
1540	10	57955672	58809133					2050	64	0.00690486	0.00701351
1541	10	58809134	59822946	2558	105	6.46154e-05	0.000113857	2558	105	0.00894949	0.00542054
1542	10	59822947	61470383	2694	217	1.6478e-05	0.214004	2694	217	0.0251026	2.07459e-07
1543	10	61470384	62626465	2854	212	3.87377e-05	0.0396808	2854	212	0.0203172	1.35561e-06
1544	10	62626466	64069687	2759	231	3.19588e-05	0.0785352	2759	231	0.0193333	1.52594e-05
1545	10	64069688	65400431	2501	195	2.75729e-05	0.0914274	2501	195	0.0336518	9.36469e-12
1546	10	65400432	66510387	1714	144	6.41101e-05	0.000580706	1714	144	0.0173271	2.91991e-05
1547	10	66510388	67146043	1780	102	3.75098e-05	0.0101414	1780	102	0	0.416845
1548	10	67146044	67769822	1761	123	1.43449e-05	0.1838	1761	123	0.00949185	0.00345378
1549	10	67769823	68623274	2923	150	3.92758e-05	0.0195915	2923	150	0.0109372	0.00267794
1550	10	68623275	69904170	1839	124	4.54405e-06	0.370313	1839	124	0.017284	1.13828e-05
1551	10	69904171	71050504	2590	177	6.7365e-05	0.000878393	2590	177	0.0308697	1.97502e-11
1552	10	71050505	71672997	1946	283	0.000192656	2.85958e-11	1946	283	0.025145	9.43671e-08	0.288372	0.0592554	0
1553	10	71672998	72659223	2582	264	0.000125484	1.76143e-06	2582	264	0.0145787	0.000508735
1554	10	72659224	73514214	2322	304	5.33826e-05	0.0219668	2322	304	0.0291375	9.89066e-10
1555	10	73514215	75694023	1765	154	0.000100891	1.35377e-06	1765	154	0.0280639	4.65778e-10	-0.383644	0.026449	0
1556	10	75694024	77144961					1356	110	0.0120068	0.000349307
1557	10	77144962	78665481	2011	196	4.28647e-05	0.0231523	2011	196	0.0290258	8.60807e-09
1558	10	78665482	79952996	2363	241	3.53175e-05	0.063817	2363	241	0	0.232271
1559	10	79952997	81190573	2781	333	0.000129133	6.99475e-06	2781	333	0.0136416	0.000340135
1560	10	81190574	81763230	894	49	1.30379e-05	0.107565	894	49	0.000522902	0.272166
1561	10	81763231	82378048	1704	132	2.57479e-05	0.0687441	1704	132	0.0064399	0.0298757
1562	10	82378049	83596350	2849	189	7.19609e-06	0.343006	2849	189	0.0131797	0.000889638
1563	10	83596351	84679429					1429	153	0.0183919	8.98658e-06
1564	10	84679430	85463484					2471	97	0.00416939	0.0744384
1565	10	85463485	86459980	2585	209	3.60189e-05	0.0492624	2585	209	0.00973462	0.0038114
1566	10	86459981	87287935	2226	120	1.0793e-05	0.239894	2226	120	0.00366927	0.0983554
1567	10	87287936	88443652	2491	219	5.40773e-05	0.00941462	2491	219	0.0190363	6.56923e-05
1568	10	88443653	89971628	2192	228	8.4804e-05	0.000259404	2192	228	0.0182366	1.85915e-05
1569	10	89971629	91021321	2053	233	3.81409e-05	0.048419	2053	233	0.0284026	4.25076e-08
1570	10	91021322	91960435	1816	153	4.81095e-05	0.00703377	1816	153	0.0140752	0.000512052
1571	10	91960436	92911506	2109	151	1.7307e-05	0.164874	2109	151	0.0117679	0.00218276
1572	10	92911507	94503299	2050	148	2.66107e-05	0.0726784	2050	148	0.00209115	0.182317
1573	10	94503300	95528160					2359	219	0.0115428	0.00573717
1574	10	95528161	97040172	2565	151	1.23854e-05	0.235855	2565	151	0.0103294	0.0040592
1575	10	97040173	98005994	2165	178	3.49038e-05	0.0426579	2165	178	0.0125854	0.00113048
1576	10	98005995	99367800	2328	250	6.17109e-05	0.0061257	2328	250	0.0192603	1.32411e-05
1577	10	99367801	100337830	1801	230	7.68372e-05	0.000774699	1801	230	0.00775758	0.0162451
1578	10	100337831	101271451					1342	99	0.00874691	0.00440592
1579	10	101271452	102509298	2183	205	7.24508e-05	0.000828092	2183	205	0.00626802	0.0393172
1580	10	102509299	104206837	2317	249	6.60515e-05	0.00376251	2317	249	0.0339302	7.09093e-10
1581	10	104206838	106142283	3222	233	3.77808e-05	0.0499751	3222	233	0.00804107	0.0137778
1582	10	106142284	107877787	2925	197	1.58266e-06	0.447712	2925	197	0.0224303	9.11714e-07
1583	10	107877788	108725997	1532	147	1.89045e-05	0.142634	1532	147	0.0185559	1.23612e-05
1584	10	108725998	109579149					1877	159	0.0144447	0.000218165
1585	10	109579150	110358382	1850	140	6.78051e-06	0.330255	1850	140	0.00801637	0.0128193
1586	10	110358383	112164981	3052	201	2.90825e-05	0.0836276	3052	201	0.0155323	0.000156114
1587	10	112164982	113117615	1719	229	8.29207e-05	0.000340778	1719	229	0.0237918	7.90903e-07
1588	10	113117616	114255954					1996	154	0.0131647	0.000566277
1589	10	114255955	115588903	2088	266	0.000121519	3.47785e-06	2088	266	0.0383048	8.3787e-12	-0.500595	0.0021232	0
1590	10	115588904	116845213	2084	206	2.88159e-05	0.088012	2084	206	0.0270639	4.9667e-08
1591	10	116845214	118416049	2399	147	2.22942e-05	0.10707	2399	147	0.0274212	1.87535e-09
1592	10	118416050	119528730	1395	203	8.77817e-05	8.90104e-05	1395	203	0.0188571	1.9455e-05
1593	10	119528731	120592839	1871	219	8.59285e-05	0.000178524
1594	10	120592840	121874445	2787	241	0.000471588	2.76558e-45	2787	241	0.121569	4.08037e-82	-0.71761	2.18893e-27	1	BAG3	DCM_MTAG,CC_MTAG,HCM_MTAG,HCM_GWAS,DCM_GWAS,CC_GWAS
1595	10	121874446	122803506	2029	226	7.16877e-05	0.00137444	2029	226	0.00762267	0.00568826
1596	10	122803507	123856184	2260	263	9.32733e-05	0.00018012	2260	263	0.0278799	2.8843e-08
1597	10	123856185	124894142	2373	242	6.61502e-05	0.00339598	2373	242	0.0206045	3.23232e-05
1598	10	124894143	125798319	2483	264	0.000120133	4.04735e-06	2483	264	0.0260712	6.64187e-08	-0.151696	0.39761	0
1599	10	125798320	126875816	2410	263	1.86851e-05	0.207383	2410	263	0.04038	6.68004e-14
1600	10	126875817	127997708	2239	211	7.24594e-05	0.000928952	2239	211	0.0134632	0.000191609
1601	10	127997709	129134738	2232	272	6.09857e-05	0.00836876	2232	272	0.0176098	1.16301e-05
1602	10	129134739	129831969	2503	269	0.000132203	7.21263e-07	2503	269	0.0300767	1.5806e-10	-0.132898	0.407683	0
1603	10	129831970	130694008	2171	283	9.19131e-05	0.00031591	2171	283	0.0205133	8.47979e-07
1604	10	130694009	131694738	1781	193	8.87742e-05	5.67339e-05	1781	193	0.0166871	0.00010258
1605	10	131694739	132576793					2533	209	0.0191666	4.16757e-07
1606	10	132576794	133111170					2154	272	0.0276054	1.96381e-08
1607	10	133111171	133818036	1971	246	3.59699e-05	0.0624263	1971	246	0.0266721	3.26173e-08
1608	10	133818037	134856054	2794	280	5.49851e-05	0.0159433	2794	280	0.0201013	7.88885e-06
1609	10	134856055	135524372	1017	124	1.20572e-05	0.222287	1017	124	0	0.424281
1610	11	87150	1061399					2000	241	0.016431	0.000241537
1611	11	1061400	1857845					2051	207	0.0408725	1.09764e-14
1612	11	1857846	2477449	1186	186	1.50894e-05	0.216759	1186	186	0.0148496	0.000257434
1613	11	2477450	3362508	1807	294	3.74708e-05	0.0703426	1807	294	0.0194401	4.44837e-05
1614	11	3362509	4405707	1410	138	2.77858e-05	0.0592428	1410	138	0.0024021	0.19889
1615	11	4405708	4946051	1891	193	3.09604e-05	0.0683956	1891	193	0.00939952	0.0088716
1616	11	4946052	5533057					1957	168	0.00561403	0.0241599
1617	11	5533058	6180840	2200	193	3.30708e-05	0.0570009	2200	193	0.0181077	5.81335e-06
1618	11	6180841	7191230	2249	253	8.96563e-06	0.333349	2249	253	0.028315	1.61683e-10
1619	11	7191231	7915071	2006	226	8.28731e-05	0.000322424	2006	226	0.0238822	1.27228e-07
1620	11	7915072	9080939	2750	260	1.12794e-05	0.301144	2750	260	0.034117	2.62153e-11
1621	11	9080940	10370100	2566	190	9.35557e-07	0.459384	2566	190	0.0209044	1.35027e-06
1622	11	10370101	11081299	1759	212	3.7328e-05	0.0449716	1759	212	0.020265	4.24421e-06
1623	11	11081300	11632650	1863	268	0.000108345	2.57874e-05	1863	268	0.0220734	5.0524e-06
1624	11	11632651	12470449	2132	282	8.20157e-05	0.00101264	2132	282	0.0229925	1.17766e-06
1625	11	12470450	13364727	1979	233	8.90063e-05	0.000162782	1979	233	0.022129	9.77169e-07
1626	11	13364728	15126767	2849	219	6.09152e-05	0.00441955	2849	219	0.040159	1.28016e-15
1627	11	15126768	16383386	1864	184	5.76969e-05	0.00367527	1864	184	0.0187309	9.30754e-06
1628	11	16383387	17583948	2047	171	5.9437e-05	0.00227853	2047	171	0.0211793	3.23474e-06
1629	11	17583949	18740267	2289	219	4.33019e-05	0.0276309	2289	219	0.0151326	0.000263522
1630	11	18740268	19780784	1763	218	7.25855e-05	0.0010516	1763	218	0.0366273	1.03696e-11
1631	11	19780785	20686336	2136	295	1.35409e-05	0.281023	2136	295	0.0401763	1.82265e-13
1632	11	20686337	21442722	1617	245	0.000133558	2.34197e-07	1617	245	0.0262477	6.05272e-10	0.0131929	0.934968	0
1633	11	21442723	22368743	1951	144	6.52963e-05	0.000476795	1951	144	0.00512432	0.0540091
1634	11	22368744	23164544	1571	119	3.25073e-05	0.0276135	1571	119	0.0120154	0.000850629
1635	11	23164545	24091272	2283	156	6.52064e-05	0.000697439	2283	156	0.00390575	0.088558
1636	11	24091273	24892439					2213	175	0.0139572	0.00029287
1638	11	25662919	26356980	2323	110	2.9007e-05	0.0368571	2323	110	0.00243321	0.179563
1639	11	26356981	27018307	1847	139	4.47497e-05	0.00831831	1847	139	0.0175622	2.21527e-05
1640	11	27018308	28577718	2047	169	3.59799e-06	0.404512	2047	169	0.0192663	6.81963e-06
1641	11	28577719	29530460	1726	150	1.47165e-05	0.19947	1726	150	0.0114252	0.00191507
1642	11	29530461	30570129	835	95	1.37478e-05	0.165226	835	95	0.00613931	0.028057
1686	11	79802287	80726012	1534	200	8.51906e-05	0.000121099	1534	200	0.0218337	5.76275e-07
1687	11	80726013	81658298	2552	210	8.52822e-05	0.000155755	2552	210	0.0207785	1.90822e-06
1688	11	81658299	82833181					2657	194	0.0284394	3.53915e-09
1689	11	82833182	83677773	1520	134	8.16595e-06	0.299718	1520	134	0.00616541	0.0346853
1690	11	83677774	84613229	1464	164	3.34237e-05	0.0432225	1464	164	0.0111443	0.00315147
1691	11	84613230	85869059					2396	141	0.00859288	0.0132261
1692	11	85869060	86629333	1954	188	2.07381e-05	0.148753	1954	188	0.0140693	0.000186231
1693	11	86629334	87676870	2581	178	6.67148e-05	0.000990572	2581	178	0.00652176	0.0363566
1694	11	87676871	88359287	1642	154	3.63814e-05	0.0285587	1642	154	0.0039613	0.0838091
1695	11	88359288	89209738					1473	77	0.00553105	0.0247019
1696	11	89209739	90199932	1339	78	1.18995e-05	0.175176	1339	78	0.00312605	0.120826
1697	11	90199933	90967061	1667	95	1.16815e-05	0.200076	1667	95	0.00855027	0.00641998
1698	11	90967062	92209168	2434	159	4.88386e-05	0.00714881	2434	159	0.0241409	3.01495e-08
1699	11	92209169	93576641	2420	206	7.88827e-05	0.00035179	2420	206	0.00706357	0.0141648
1700	11	93576642	94384535					1750	139	0.002693	0.155429
1701	11	94384536	95327210	1537	216	5.45958e-05	0.00857709	1537	216	0.00854647	0.00792286
1702	11	95327211	96150134	1751	229	5.26828e-05	0.0121642	1751	229	0.0222384	4.44098e-06
1703	11	96150135	97091671	1659	174	1.30764e-05	0.239118	1659	174	0.00474759	0.0704795
1704	11	97091672	98145570	2620	203	1.37426e-05	0.244412	2620	203	0	0.339539
1705	11	98145571	98929380					2264	161	0.0134951	0.00039252
1706	11	98929381	99619347	2017	145	4.13453e-05	0.0141946	2017	145	0.00280932	0.16038
1707	11	99619348	100423901	1726	193	3.18993e-05	0.0630216	1726	193	0.0189803	7.20524e-06
1708	11	100423902	101152831	1928	165	3.99402e-05	0.0221538	1928	165	0.0130911	0.00077796
1709	11	101152832	101881252	1898	133	5.86471e-06	0.345691	1898	133	0.00531431	0.0405622
1710	11	101881253	102671665	1805	210	4.53241e-05	0.0209091	1805	210	0.0192856	3.51349e-06
1711	11	102671666	103495635	2386	160	3.92201e-05	0.0225499	2386	160	0.00706129	0.0179458
1712	11	103495636	104875270					2775	168	0.0138285	0.000413702
1714	11	105932283	107054024	2013	202	1.9188e-05	0.173506	2013	202	0.0125904	0.00102906
1715	11	107054025	107846824					2133	152	0.00349055	0.0916496
1716	11	107846825	109891837	2485	190	1.43553e-05	0.229005	2485	190	0.00170694	0.1872
1717	11	109891838	111117780					2194	189	0.00481841	0.072522
1718	11	111117781	112755446	2288	203	2.98646e-05	0.0795722	2288	203	0.00397448	0.0599844
1719	11	112755447	113889019	2081	203	3.30715e-05	0.0609087	2081	203	0.0164561	7.12905e-05
1720	11	113889020	114742317	1676	212	0.000119206	7.22419e-07	1676	212	0.00776524	0.0107446
1721	11	114742318	116247377	2550	278	0.000166215	3.09809e-09	2550	278	0.00880196	0.00462897
1722	11	116247378	117295641	2486	242	2.87304e-05	0.104548	2486	242	0.0354534	1.3839e-11
1723	11	117295642	118901213	3130	308	2.72217e-05	0.141563	3130	308	0.00246181	0.030649
1724	11	118901214	120064528	2239	257	5.43101e-05	0.0138278	2239	257	0.000745245	0.150781
1725	11	120064529	121208186	1956	228	2.50407e-05	0.127826	1956	228	0.0286332	1.5795e-09
1726	11	121208187	122589224	2242	244	5.40599e-05	0.0124574	2242	244	0.0113431	0.00213332
1727	11	122589225	123398882	1720	234	4.3927e-05	0.0295815	1720	234	0.0362089	1.32471e-42
1728	11	123398883	124403477					2735	180	0.0185945	1.09162e-05
1729	11	124403478	125266684	1635	242	6.90298e-05	0.00245452	1635	242	0.0188752	3.05297e-05
1730	11	125266685	126304240	2468	222	2.34883e-05	0.139	2468	222	0.00417275	0.0824216
1731	11	126304241	127306871	2426	256	9.61533e-05	0.000105351	2426	256	0.0156152	0.000120719
1732	11	127306872	128262550	2127	190	6.1929e-05	0.00240708	2127	190	0.0058702	0.0479663
1733	11	128262551	129451784	2366	284	9.52741e-05	0.000212233	2366	284	0.0228261	6.48051e-07
1734	11	129451785	130500783	1998	259	2.20941e-05	0.169037	1998	259	0.0147654	0.000215602
1735	11	130500784	131424361	1895	272	4.8289e-05	0.0268319	1895	272	0.0455507	3.59119e-17
1736	11	131424362	132584401	2550	290	3.18571e-05	0.101037	2550	290	0.0162048	8.85516e-05
1737	11	132584402	133521642	1927	282	2.24867e-05	0.174559	1927	282	0.0224555	1.38529e-06
1738	11	133521643	134351064	1761	279	6.08875e-05	0.00907913	1761	279	0.0164732	2.17811e-05
1739	11	134351065	134946450					2057	224	0.0136237	0.000909513
1740	12	60317	1078397	1847	248	0.00014161	6.61931e-08	1847	248	0.0150629	0.000252072
1741	12	1078398	1942426	1766	192	3.51921e-05	0.0466595	1766	192	0.0124567	0.00204534
1742	12	1942427	3069506	1966	250	5.54206e-05	0.0115539	1966	250	0.0141156	0.000288492
1743	12	3069507	3871114	1770	237	7.67429e-05	0.000893219	1770	237	0.037344	6.26681e-13
1744	12	3871115	4967643	1869	246	5.32096e-05	0.0138128	1869	246	0.0318666	3.37745e-11
1745	12	4967644	6023700	2269	287	0.000192656	3.54816e-11	2269	287	0.0310456	6.50557e-11	0.157571	0.257625	0
1746	12	6023701	6948954	1670	224	3.01773e-05	0.0867841	1670	224	0.0116335	0.00121438
1747	12	6948955	8123317	1915	230	2.69818e-05	0.112027	1915	230	0.00482826	0.0251687
1748	12	8123318	8760628	591	92	2.40157e-05	0.051708	591	92	0.000770155	0.298182
1749	12	8760629	10176713					2770	245	0.0154257	0.000978575
1750	12	10176714	10946140	1535	161	4.86513e-05	0.00756852	1535	161	0.010834	0.0030831
1751	12	10946141	11742149	1568	74	1.32312e-05	0.147026	1568	74	0.000331726	0.36782
1752	12	11742150	12721874	1722	250	4.31667e-05	0.0356021	1722	250	0.0180713	3.20636e-06
1753	12	12721875	13559527	1504	237	0.000101345	3.09663e-05	1504	237	0.021372	1.67863e-07
1754	12	13559528	14656849	2551	244	4.52542e-05	0.0283833	2551	244	0.0116394	0.000669753
1755	12	14656850	16136742	1912	199	3.60456e-05	0.0456044	1912	199	0.0281562	1.86881e-08
1756	12	16136743	17374895	1748	222	1.55021e-05	0.228984	1748	222	0.0121618	0.00239838
1757	12	17374896	18470023	2545	166	4.72806e-05	0.00971796	2545	166	0.0175093	1.5256e-05
1758	12	18470024	19532765	1886	173	4.5419e-05	0.0133893	1886	173	0.00837857	0.00656261
1759	12	19532766	20074930	1646	136	3.28322e-05	0.0338615	1646	136	0.0121869	0.000858193
1760	12	20074931	20866285	1778	221	4.44962e-05	0.0251295	1778	221	0.0115145	0.00287462
1761	12	20866286	21572252	1615	116	2.84558e-05	0.0428014	1615	116	0.0107787	0.00151065
1762	12	21572253	22928055	1778	168	6.3898e-05	0.001151	1778	168	0.00955452	0.00525493
1763	12	22928056	23923798	1787	256	8.28591e-05	0.000591745	1787	256	0.0276035	3.08341e-08
1764	12	23923799	25058714	2508	274	9.61665e-05	0.000154554	2508	274	0.0152005	0.000355506
1765	12	25058715	25990813	2043	219	9.54461e-05	4.48251e-05	2043	219	0.0145496	0.000320586
1766	12	25990814	26958056	2444	226	6.40505e-05	0.00341471	2444	226	0.0400123	2.25228e-14
1767	12	26958057	27797262	1979	162	6.6522e-07	0.463544	1979	162	0.0122695	0.001177
1768	12	27797263	28753585	1965	189	4.74367e-05	0.0132277	1965	189	0.0217514	1.5589e-06
1769	12	28753586	29647193					2342	147	0.00316163	0.142306
1770	12	29647194	30358377	2063	217	4.53609e-05	0.0223462	2063	217	0.0256835	7.49539e-08
1771	12	30358378	31067298	2133	137	4.7884e-05	0.00524886
1772	12	31067299	31797152	1621	177	6.82257e-05	0.000798584	1621	177	0.0206738	1.61577e-06
1773	12	31797153	32368905	1821	185	4.75539e-05	0.0124039	1821	185	0.0043632	0.0919914
1774	12	32368906	33076722	2009	169	7.61076e-05	0.00019359	2009	169	0.0143254	0.000142821
1775	12	33076723	34340495	2426	76	1.33564e-05	0.147512	2426	76	0.000350761	0.389003
1776	12	34340496	38108284	719	10	1.06033e-06	0.355066
1777	12	38108285	38746760					544	15	0.000280499	0.287762
1778	12	38746761	40017396	1245	63	1.09585e-05	0.169933	1245	63	0.00452227	0.0487865
1779	12	40017397	41198229	2855	165	2.12587e-05	0.128945	2855	165	0.0158177	5.63017e-05
1780	12	41198230	42117736	2243	129	3.01524e-05	0.0417226	2243	129	0.00764463	0.0114726
1781	12	42117737	43072679	1883	142	4.32552e-05	0.0106522	1883	142	0.00611394	0.0329056
1782	12	43072680	43980531	2333	163	9.01343e-06	0.299824	2333	163	0.00350814	0.0984594
1783	12	43980532	44923825					1153	105	0.0063574	0.0187184
1784	12	44923826	46037744	1539	126	5.24658e-05	0.00205026	1539	126	0.0101691	0.0033518
1785	12	46037745	47499603	2235	198	3.52846e-05	0.0485166	2235	198	0.0142728	0.0005219
1786	12	47499604	48227035	2002	211	1.40864e-05	0.243267	2002	211	0.0210708	2.89692e-06
1787	12	48227036	48960265					1679	130	0.0028016	0.149811
1788	12	48960266	50344346	1742	183	4.31113e-05	0.0194854	1742	183	0.0130584	0.00104176
1789	12	50344347	51769419	1813	132	4.40858e-05	0.00791156	1813	132	0.00158702	0.206009
1790	12	51769420	53039987	2804	282	5.35971e-05	0.0183051	2804	282	0.0120141	0.0011072
1791	12	53039988	54371448					2333	219	0.0228262	8.82711e-07
1792	12	54371449	55416802	1675	214	0.000125297	2.70674e-07	1675	214	0.0142392	0.000745493
1793	12	55416803	56987105	1706	187	6.82599e-05	0.000980311	1706	187	0.0371562	2.73225e-13
1794	12	56987106	58748139	2206	194	3.62703e-05	0.042987	2206	194	0.0142176	0.000254831
1795	12	58748140	60000363					1911	139	0.00576161	0.0238966
1796	12	60000364	61737953					3031	140	0.0129103	0.000527949
1797	12	61737954	63055936	2773	206	1.66848e-05	0.206245	2773	206	0.0139897	0.000741291
1798	12	63055937	63764111	1454	190	9.86882e-07	0.458726	1454	190	0.000491621	0.276026
1799	12	63764112	64403857					1414	114	0.00225687	0.139053
1800	12	64403858	66114643	2128	237	5.99566e-05	0.00625176	2128	237	0.0214411	1.30467e-06
1801	12	66114644	67183620					1853	202	0.0208881	4.9297e-06
1802	12	67183621	68006682	1666	174	4.35535e-05	0.0167114	1666	174	0.00969583	0.00617082
1803	12	68006683	68839661	1657	210	0.000130247	8.99893e-08	1657	210	0.0236215	1.36729e-07	0.493761	0.00446884	0
1804	12	68839662	70097805	2800	266	2.74522e-05	0.124176	2800	266	0.0123928	0.00174422
1805	12	70097806	71177961	2701	189	2.17956e-05	0.138314	2701	189	0.0284385	7.15575e-09
1806	12	71177962	71948185					1599	129	0.0139194	0.000144901
1807	12	71948186	73154515	1162	118	8.4164e-06	0.284	1162	118	0.0118166	0.000924072
1809	12	74080748	75563968	2607	141	1.92937e-05	0.133728	2607	141	0.00286008	0.134113
1810	12	75563969	76524573	1689	212	8.69057e-05	0.000129761	1689	212	0	0.393025
1811	12	76524574	77800463	2732	225	1.52659e-05	0.233457	2732	225	0.0100535	0.00507636
1812	12	77800464	79315178	2759	256	0.000104485	3.27907e-05	2759	256	0.0385452	1.93453e-14
1813	12	79315179	80952472	1351	93	1.54399e-05	0.137722	1351	93	0.00725044	0.0138264
1814	12	80952473	81843890					1516	117	0.00549357	0.0396438
1815	12	81843891	82576129	1644	113	5.82309e-06	0.335944	1644	113	0.00703474	0.0181071
1816	12	82576130	83551125	1392	134	3.3431e-05	0.0307552	1392	134	0.0171864	2.17247e-05
1817	12	83551126	84356775	1829	81	1.32113e-05	0.156746	1829	81	0.00655408	0.0156794
1818	12	84356776	85345631					2052	122	0.0154444	2.26201e-05
1819	12	85345632	86933476	2347	97	3.33453e-05	0.0163879	2347	97	0.00901619	0.00251207
1820	12	86933477	88344764	2610	109	1.8046e-05	0.121103
1821	12	88344765	90567001	1954	183	1.2326e-05	0.255391
1822	12	90567002	92061179	2243	162	8.24461e-06	0.31343
1823	12	92061180	93487547	2920	244	7.4181e-05	0.0013783	2920	244	0.026368	1.27593e-07
1824	12	93487548	94385884	1729	227	6.61014e-05	0.00273158	1729	227	0.0216162	1.73369e-06
1825	12	94385885	95147845	2030	268	0.000167799	1.45088e-09	2030	268	0.0142465	0.0003615
1826	12	95147846	96017782	2590	188	3.9001e-05	0.0314103	2590	188	0.00732244	0.0206217
1827	12	96017783	96828314	1854	232	2.00812e-05	0.178689	1854	232	0.00812935	0.0117055
1828	12	96828315	97814021	2335	200	8.48282e-05	0.000127428	2335	200	0.0196658	9.46443e-06
1829	12	97814022	99244337	2667	254	4.12128e-05	0.0429591	2667	254	0.0285461	1.33031e-08
1830	12	99244338	100931423	2290	206	2.29831e-05	0.135671	2290	206	0.00275595	0.119292
1831	12	100931424	101825061	1768	212	2.01706e-05	0.167807	1768	212	0.0122766	0.00212125
1832	12	101825062	102966633	1904	194	1.8827e-05	0.173543	1904	194	0.00936738	0.00433511
1833	12	102966634	104140831	2343	228	3.13051e-06	0.42291	2343	228	0.0195792	1.05073e-05
1834	12	104140832	105079100	2614	223	6.40863e-05	0.00323875	2614	223	0.0213372	5.04375e-06
1835	12	105079101	106153787	2144	201	1.70748e-05	0.198397	2144	201	0.0170097	0.000139772
1836	12	106153788	106964977	1608	200	5.50308e-05	0.00656054	1608	200	0.0318252	3.99869e-10
1837	12	106964978	108183188	1872	173	8.28959e-05	7.4838e-05	1872	173	0.0238467	1.26466e-07
1838	12	108183189	109031819	1928	190	2.02947e-05	0.154617	1928	190	0.0228837	4.31562e-07
1839	12	109031820	110111514	2095	190	6.74283e-05	0.00117589	2095	190	0.00757816	0.0151309
1840	12	110111515	111592381					1504	148	0.0108046	0.00259055
1841	12	111592382	113947983	2113	199	1.97505e-05	0.165825	2113	199	0.029499	5.29735e-09
1842	12	113947984	114685670					1976	199	0.0124105	0.00200759
1843	12	114685671	115439451	1700	217	2.46741e-05	0.125728	1700	217	0.0343542	2.29157e-11
1844	12	115439452	116197675	1836	249	4.41172e-05	0.0325512	1836	249	0.0363943	2.13337e-12
1845	12	116197676	117091843	1845	245	6.78793e-05	0.00291995	1845	245	0.0329838	4.7893e-12
1846	12	117091844	118256124					2338	269	0.0127861	0.000438754
1847	12	118256125	119301061	2128	215	1.70468e-05	0.206117	2128	215	0.0124662	0.00285582
1848	12	119301062	120567740	2541	268	0.0001022	6.08848e-05	2541	268	0.0153711	6.82078e-05
1849	12	120567741	121817509	2648	204	3.57519e-05	0.0486414	2648	204	0.0174056	1.19196e-05
1850	12	121817510	123396634	2274	180	9.22479e-07	0.45938	2274	180	0.00394939	0.0554618
1851	12	123396635	124843768	2444	207	1.23955e-06	0.45497	2444	207	0.0250493	4.64338e-08
1852	12	124843769	126079935	2926	332	0.000147481	4.97957e-07	2926	332	0.0116641	2.11547e-05	-0.199912	0.291229	0
1853	12	126079936	126871452	1969	190	1.98897e-05	0.159183
1854	12	126871453	127545377	1335	148	2.91245e-05	0.0569648	1335	148	0.00761205	0.0153281
1855	12	127545378	128372588	1771	250	5.73092e-05	0.00959883	1771	250	0.0173275	2.03812e-05
1856	12	128372589	129170296	1622	254	4.32929e-05	0.0361943	1622	254	0.0339099	7.0004e-11
1857	12	129170297	129887418	2035	297	9.86891e-05	0.000176974	2035	297	0.015956	2.39152e-05
1858	12	129887419	130629840	1963	276	0.000113256	1.5806e-05	1963	276	0.010599	0.00456817
1859	12	130629841	131404042	2302	279	4.10411e-05	0.0501662	2302	279	0.00585919	0.0372244
1860	12	131404043	132012316	1596	192	7.23032e-05	0.000629434	1596	192	0.0240405	1.10883e-07
1861	12	132012317	132957945	1288	190	4.02129e-05	0.0284614	1288	190	0.0266048	2.25021e-08
1862	12	132957946	133841814	1695	166	4.70644e-05	0.0100249	1695	166	0.0130378	0.00118785
1863	13	19020095	19648628	432	51	2.1038e-05	0.0323356	432	51	0.00127337	0.260701
1864	13	19648629	20491181	1795	79	2.36218e-05	0.0435354	1795	79	0.00463986	0.00726909
1865	13	20491182	21540733	1905	220	6.78047e-05	0.00199106	1905	220	0.0228566	2.39648e-06
1866	13	21540734	22795188	2592	281	0.000114346	1.53633e-05	2592	281	0.0322109	4.26007e-11	-0.275297	0.102744	0
1867	13	22795189	23729049	2616	287	4.63366e-05	0.034905	2616	287	0.0207971	5.87571e-06
1868	13	23729050	24818333	3353	292	2.501e-06	0.438957	3353	292	0.00751833	0.0120397
1869	13	24818334	25977140	2919	243	0.000100398	4.22576e-05	2919	243	0.0145301	0.000410693
1870	13	25977141	26681709	1412	141	3.07309e-05	0.045069	1412	141	0.0110042	0.00227041
1871	13	26681710	27392005	1486	144	1.77862e-05	0.15365	1486	144	0	0.408238
1872	13	27392006	28587125	3147	289	2.00756e-05	0.201754	3147	289	0.00989671	0.00189147
1873	13	28587126	30068525	2652	254	0.00011975	3.12428e-06	2652	254	0.021867	4.05122e-06	0.011138	0.953585	0
1874	13	30068526	31433218	3185	287	3.61576e-05	0.0749258	3185	287	0.0331433	1.74606e-10
1875	13	31433219	32986686	3043	272	0.000177697	2.79445e-10	3043	272	0.0327085	1.6532e-12	-0.415656	0.00283411	0
1876	13	32986687	34722391					2619	242	0.0206089	2.65719e-06
1877	13	34722392	35744568	1692	183	4.229e-05	0.0213606	1692	183	0.0218132	2.42249e-07
1878	13	35744569	36579413	1919	187	8.31773e-05	0.000112076	1919	187	0.0201249	6.39609e-06
1879	13	36579414	37499810	1729	168	7.80601e-05	0.000137059	1729	168	0.00839486	0.0122123
1880	13	37499811	38290689	1850	121	2.6117e-05	0.0590362
1881	13	38290690	39381743	1898	162	5.08403e-05	0.00585265	1898	162	0	0.310937
1882	13	39381744	40091623	1789	129	9.28341e-07	0.454647	1789	129	0.00875858	0.00701135
1883	13	40091624	41003943	1989	251	8.47668e-05	0.000421722	1989	251	0.00944455	0.00445687
1884	13	41003944	42037054	1422	167	8.61784e-05	3.51523e-05	1422	167	0.010516	0.00300499
1885	13	42037055	42950157	1824	153	7.24e-05	0.000207044	1824	153	0.0170334	2.42645e-05
1886	13	42950158	43931931	1903	207	3.44905e-05	0.0554709	1903	207	0.0172994	9.44746e-05
1887	13	43931932	45476446	2480	218	2.75164e-05	0.102813	2480	218	0.0250884	8.7235e-08
1888	13	45476447	46493236	1561	184	4.24613e-05	0.0212096	1561	184	0.0131963	0.000452031
1889	13	46493237	47433528	1616	165	4.79371e-05	0.00883169	1616	165	0.0206387	3.41967e-06
1890	13	47433529	48137479					1596	140	0.0167258	3.74344e-05
1891	13	48137480	49381727					2197	145	0.0070024	0.025984
1892	13	49381728	50419896	2037	185	5.91057e-05	0.0031403	2037	185	0.00649994	0.0223025
1893	13	50419897	51554236	1940	202	7.30381e-05	0.000715638	1940	202	0.0249365	1.98662e-08
1894	13	51554237	53336571	2593	239	3.00476e-05	0.0938351	2593	239	0.0403271	3.85021e-15
1895	13	53336572	54684856	2725	235	0.000112446	5.29026e-06	2725	235	0.0302264	3.00021e-09	0.221247	0.205307	0
1896	13	54684857	55576912	1702	148	4.03168e-05	0.01686	1702	148	0.00870331	0.0048169
1897	13	55576913	56434007	1823	77	1.92261e-05	0.0749068	1823	77	0.00661191	0.0125592
1898	13	56434008	58245843					2123	119	0.0112823	0.00126554
1899	13	58245844	59751795	2882	155	2.69888e-05	0.074215	2882	155	0.0052756	0.0459549
1900	13	59751796	61268155	2928	219	1.10406e-05	0.290963	2928	219	0.0244719	3.92329e-07
1901	13	61268156	62135827	1757	125	2.5397e-05	0.066596	1757	125	0.00950123	0.00322797
1902	13	62135828	63206535					2531	116	0.00399948	0.107965
1903	13	63206536	63973941					1686	112	0.00766565	0.0101838
1904	13	63973942	65187138					3008	114	0.0103632	0.00197313
1905	13	65187139	66382286					2095	178	0	0.297498
1906	13	66382287	67718879	2415	197	4.24889e-06	0.397908	2415	197	0.0211964	2.5562e-06
1907	13	67718880	69004702	2193	184	6.84642e-06	0.347568	2193	184	0.0224606	3.5831e-07
1908	13	69004703	69751491					2356	116	0.00801527	0.00989168
1910	13	70427881	71010208					1677	157	0.00429058	0.085449
1911	13	71010209	71976862	2256	220	9.25288e-06	0.319139	2256	220	0.0130788	0.000753237
1912	13	71976863	73114509	1350	152	1.02995e-05	0.271317
1913	13	73114510	74437635	2772	253	7.72309e-05	0.00111642	2772	253	0.0350188	1.02124e-11
1914	13	74437636	75882384	2961	256	0.000118838	3.84674e-06	2961	256	0.0213038	3.09134e-06	-0.334248	0.0814191	0
1915	13	75882385	76671493	1951	163	3.77998e-05	0.0272668	1951	163	0.00494321	0.053319
1916	13	76671494	77460044	1858	192	2.50442e-05	0.109664	1858	192	0	0.294432
1917	13	77460045	78693310					2152	134	0.00792928	0.0135694
1918	13	78693311	79489045	1805	174	9.39121e-06	0.298705	1805	174	0.005867	0.026912
1919	13	79489046	80778339	2066	211	0.000106916	5.65537e-06	2066	211	0.023159	1.76419e-07	0.15169	0.414496	0
1920	13	80778340	81724089	1385	122	2.182e-05	0.0930036	1385	122	0.0038533	0.112205
1921	13	81724090	82582821					1901	131	0.0141681	0.000100837
1923	13	83829836	85035400	2075	163	5.70192e-06	0.361746	2075	163	0.0136447	0.000199065
1924	13	85035401	85650680					1791	104	0.0109595	0.00105454
1925	13	85650681	86321288	1741	117	2.46921e-06	0.414257	1741	117	0.00939446	0.00306059
1926	13	86321289	87043588	1731	100	6.28547e-06	0.316531	1731	100	0.00389869	0.101704
1927	13	87043589	88029523					1979	97	0.0071504	0.00986636
1928	13	88029524	88968400					1697	129	0.00437878	0.0820035
1929	13	88968401	89764426					1666	88	0.00338363	0.0984914
1930	13	89764427	90518147	1548	129	6.17922e-06	0.337274	1548	129	0.012326	0.000808977
1931	13	90518148	91764204	3128	222	5.92315e-05	0.00557212	3128	222	0.00332867	0.0776688
1932	13	91764205	93285142	2696	214	4.11288e-05	0.0323237	2696	214	0.0188909	1.05932e-05
1933	13	93285143	94925136	3261	262	5.26084e-05	0.0169511	3261	262	0.0156637	0.000250328
1934	13	94925137	96132647	3106	291	0.000143217	2.60171e-07	3106	291	0.0388478	1.13017e-16	0.0487569	0.729992	0
1935	13	96132648	97516609					2156	137	0.00320689	0.141788
1936	13	97516610	98527335	1315	141	2.69808e-05	0.0660278	1315	141	0	0.402442
1937	13	98527336	99402294	1697	241	0.000112191	6.69727e-06	1697	241	0.0164636	9.29701e-05
1938	13	99402295	100470868	2347	175	8.44247e-06	0.315593	2347	175	0.0139005	0.000365233
1939	13	100470869	101573736	2000	225	1.23459e-05	0.274024	2000	225	0.0280368	2.80241e-09
1940	13	101573737	103050417	3216	292	5.52104e-06	0.392502	3216	292	0.0298669	1.48506e-10
1941	13	103050418	104378435	3152	266	9.15576e-05	0.000238899	3152	266	0.00868511	0.0159876
1942	13	104378436	105672500	2434	253	4.00142e-05	0.0470963	2434	253	0.0304043	2.22903e-10
1943	13	105672501	106313847	1540	182	5.07158e-05	0.00828726	1540	182	0.020109	4.12363e-06
1944	13	106313848	107037864	1748	220	3.27208e-05	0.0697463	1748	220	0.02653	2.22063e-08
1945	13	107037865	108521978	3108	328	2.33746e-05	0.182258	3108	328	0.0370137	3.99799e-13
1946	13	108521979	109156765					1373	177	0.00289306	0.121556
1947	13	109156766	109813576	1788	198	4.40623e-05	0.0209413	1788	198	0.00893231	0.0101632
1948	13	109813577	110995432	3175	305	0.000201724	1.63162e-11	3175	305	0.0321941	1.96568e-09	-0.635984	1.10493e-05	1	COL4A1	CC_MTAG,HCM_MTAG
1949	13	110995433	111621244	1754	250	0.000108701	1.50695e-05	1754	250	0.0271741	6.18294e-09	0.235857	0.189569	0
1950	13	111621245	112319064	1979	219	3.30883e-05	0.0672762	1979	219	0.0141758	0.000516578
1951	13	112319065	113573118					2347	277	0.0363235	8.50939e-13
1952	13	113573119	114302561	1564	210	8.32698e-05	0.000209628	1564	210	0.0627632	2.2616e-28
1953	13	114302562	115109851	763	86	4.29329e-05	0.00261086	763	86	0.0170753	9.77943e-07
1954	14	19000059	20876080	1289	147	3.91859e-05	0.0194265	1289	147	0.0161712	4.36263e-05
1955	14	20876081	21982654	2294	336	7.96153e-05	0.00262414	2294	336	0.0202356	2.84455e-07
1956	14	21982655	22760700	2505	199	1.95788e-05	0.167567	2505	199	0.0119252	0.00112251
1957	14	22760701	23985936	2538	312	0.000110957	4.98105e-05	2538	312	0.0435035	1.69362e-15
1958	14	23985937	24906056	1330	210	7.10546e-05	0.00110234	1330	210	0.0137101	0.000431779
1959	14	24906057	25585041	1681	152	1.84407e-07	0.473318	1681	152	0.0153103	5.47482e-05
1960	14	25585042	26395690	1476	144	3.7454e-05	0.0222061	1476	144	0.019051	6.39214e-06
1961	14	26395691	27720240	2121	217	5.8824e-05	0.00544854	2121	217	0.0146616	0.000234536
1962	14	27720241	29029224					2583	157	0.00657336	0.0148836
1963	14	29029225	30831154	2447	261	8.42935e-05	0.000541502	2447	261	0.0217871	2.21285e-06
1964	14	30831155	32382245	2273	175	4.59338e-05	0.0129854	2273	175	0.00928622	0.00513108
1965	14	32382246	33591113	2287	290	3.56348e-05	0.0784366	2287	290	0.0287162	5.43771e-10
1966	14	33591114	34695195	2463	341	8.09691e-05	0.00241484	2463	341	0.0257896	6.69232e-09
1967	14	34695196	35379988	1371	136	3.47245e-05	0.0272908	1371	136	0.0116739	0.00119581
1968	14	35379989	36422077	1703	123	1.01827e-06	0.451718	1703	123	0.0109519	0.00217958
1969	14	36422078	37282012	1541	142	4.00433e-05	0.0158311	1541	142	0.0210718	2.1118e-06
1970	14	37282013	38722114	2196	185	6.47794e-06	0.354541	2196	185	0.0120407	0.00175162
1971	14	38722115	40343754	3155	182	2.446e-06	0.429343	3155	182	0.0240311	1.18266e-08
1972	14	40343755	40965849					1129	61	0.00501964	0.0286849
1973	14	40965850	41614833	1463	40	1.05701e-05	0.129777	1463	40	0.00432758	0.0279702
1976	14	43321169	44623273	2586	149	1.83166e-05	0.150971	2586	149	0.00171378	0.189381
1977	14	44623274	45817082					2078	177	0.000125595	0.290447
1978	14	45817083	46748238	1394	92	1.08281e-05	0.212451	1394	92	0.0106417	0.00131054
1979	14	46748239	48177483	2839	174	9.59196e-06	0.295213	2839	174	0	0.402189
1980	14	48177484	49002065	2332	143	7.68698e-06	0.314063	2332	143	0.00362799	0.0956573
1981	14	49002066	50500564	2588	225	1.07168e-05	0.298103	2588	225	0.019463	6.11794e-06
1982	14	50500565	51418371	1747	183	6.05847e-05	0.00250016	1747	183	0.029772	3.20015e-10
1983	14	51418372	52206122	1942	216	2.51303e-05	0.121229	1942	216	0.0156789	0.000139188
1984	14	52206123	52760553	1667	184	6.34817e-05	0.00174892	1667	184	0.0187615	9.95143e-06
1985	14	52760554	54359598	2708	236	5.83909e-05	0.00731417	2708	236	0.01141	0.00304976
1986	14	54359599	55292832					1462	196	0.0203803	6.21942e-06
1987	14	55292833	56206430	1762	95	4.87052e-05	0.00134212	1762	95	0.00287491	0.0856857
1988	14	56206431	57460781	2535	251	8.5922e-05	0.000365604	2535	251	0.00698419	0.0219509
1989	14	57460782	58447798	1705	166	2.3803e-05	0.105771	1705	166	0.0101156	0.00396451
1990	14	58447799	59447537	1787	212	2.96732e-05	0.0847691	1787	212	0.0122208	0.00162486
1991	14	59447538	60099482					1843	132	0.00458476	0.0763952
1992	14	60099483	61652816	962	103	2.05964e-05	0.0882441	962	103	0.000733238	0.32614
1993	14	61652817	62717985	1499	197	2.08292e-05	0.152728	1499	197	0.00895002	0.0123197
1994	14	62717986	64033237	2580	204	1.86423e-05	0.181062	2580	204	0.01839	6.14192e-06
1995	14	64033238	65229391	1933	144	5.56562e-05	0.00206639	1933	144	0.00333559	0.0989313
1996	14	65229392	66300066	2157	172	3.0879e-05	0.0591732	2157	172	0.0168531	5.62491e-05
1997	14	66300067	67891839	1926	127	2.347e-05	0.0825207	1926	127	0.00347678	0.124479
1998	14	67891840	68976912	1660	177	6.35797e-06	0.353622	1660	177	0.0241512	7.98749e-08
1999	14	68976913	69794542	1874	228	6.25997e-05	0.00415952	1874	228	0.0223774	2.94091e-06
2000	14	69794543	71140426	2822	225	7.50144e-05	0.00089032	2822	225	0.0142156	0.000452813
2001	14	71140427	72665319	2946	214	2.85367e-06	0.42634	2946	214	0.0101646	0.00385944
2002	14	72665320	73373373	1652	200	2.01727e-05	0.161423	1652	200	0.0222913	2.39551e-06
2003	14	73373374	74245428	1610	134	3.99421e-05	0.0140761	1610	134	0.00453898	0.0496496
2004	14	74245429	75699501	2301	202	5.32345e-05	0.00826909	2301	202	0.00793671	0.0131339
2005	14	75699502	76694201	1667	218	6.84659e-05	0.00177363	1667	218	0.0173388	0.000126971
2006	14	76694202	77425453	1740	242	2.88331e-05	0.103588	1740	242	0.0112455	0.00115409
2007	14	77425454	78374053					2552	206	0.0109856	0.0015541
2008	14	78374054	79199451	1695	194	5.19731e-05	0.00853354	1695	194	0.0305976	4.19944e-10
2009	14	79199452	81001920	2896	261	3.7451e-05	0.0602151	2896	261	0.0222763	1.38564e-07
2010	14	81001921	82524785					3148	236	0.0232475	1.32471e-07
2011	14	82524786	84087372	3385	265	3.72844e-05	0.0623867	3385	265	0.00980827	0.0012205
2012	14	84087373	85562936					3273	220	0.010203	0.00659465
2013	14	85562937	86653343					2148	188	0.0136607	0.000556947
2014	14	86653344	87350275	1488	127	2.04918e-05	0.109851
2015	14	87350276	88208595					1581	114	0.00395262	0.101388
2016	14	88208596	89482883	2555	171	6.18017e-06	0.355236	2555	171	0.0349985	7.2255e-13
2017	14	89482884	90662836	2227	275	9.25561e-05	0.000250849	2227	275	0.0237555	4.56177e-07
2018	14	90662837	92101228	2726	251	0.000126112	1.03322e-06	2726	251	0.0176383	8.97462e-05
2019	14	92101229	93386328	3177	297	7.24015e-05	0.00349218	3177	297	0.00810382	0.00675368
2020	14	93386329	94892240	3461	295	9.71752e-06	0.332188	3461	295	0.0288524	2.13003e-08
2021	14	94892241	95946792	3254	336	0.000194295	2.82542e-10	3254	336	0.0618838	1.6967e-25	0.15118	0.191869	0
2022	14	95946793	97174314	2882	289	9.16332e-05	0.000364032	2882	289	0.0398706	1.00177e-15
2023	14	97174315	98268391	2041	244	3.68886e-05	0.0574641	2041	244	0.00942151	0.00458913
2024	14	98268392	98885322	1815	162	2.59445e-05	0.0858298	1815	162	0.000605409	0.267033
2025	14	98885323	99474533	1682	173	3.64877e-05	0.0347443	1682	173	0.00488215	0.0631082
2026	14	99474534	100786189	2613	301	0.000164518	1.12148e-08	2613	301	0.0317018	1.02881e-12	0.263207	0.0645043	0
2027	14	100786190	102004377	2240	298	6.40473e-05	0.00811322	2240	298	0.0307917	1.10007e-10
2028	14	102004378	103617472	2690	238	5.43447e-05	0.0113549	2690	238	0.00957281	0.0101828
2029	14	103617473	104439106	1737	147	1.24281e-05	0.232407	1737	147	0.0194361	2.02201e-06
2030	14	104439107	105091340	1226	161	2.70715e-05	0.0771219	1226	161	0.0139498	0.000619356
2031	14	105091341	106347143	955	105	3.34867e-05	0.0190454
2033	14	106876549	107289435	215	13	5.44847e-06	0.149058
2035	15	22799927	24099946	471	95	1.38935e-05	0.162901	471	95	0	0.420304
2036	15	24099947	24531187	1663	80	8.85841e-06	0.238465	1663	80	0.00716463	0.0136393
2037	15	24531188	25384327	1584	112	1.6514e-05	0.143111	1584	112	0.00501878	0.0546004
2038	15	25384328	26392947	2140	280	3.18563e-05	0.0975774	2140	280	0.0232656	1.00809e-06
2039	15	26392948	27563172	1875	238	2.71324e-05	0.11469	1875	238	0.024339	2.16573e-08
2040	15	27563173	29141035	1242	158	2.80616e-05	0.0687889	1242	158	0.00383529	0.094013
2041	15	29141036	30604119					1659	182	0.00514143	0.0591305
2042	15	30604120	32177320	2166	227	2.28242e-05	0.147868	2166	227	0.0182393	3.01559e-05
2043	15	32177321	33484267	1445	211	0.000143515	7.56064e-09	1445	211	0.0181987	1.25957e-05	-0.13845	0.445746	0
2044	15	33484268	34410072	2128	267	2.35282e-05	0.158445	2128	267	0.0337834	3.35312e-12
2045	15	34410073	35118927	1240	144	2.91623e-05	0.0545902	1240	144	0.00663111	0.0309945
2046	15	35118928	36583327	2267	230	7.63707e-05	0.000825366	2267	230	0.0110348	0.00363392
2047	15	36583328	37962915	2819	294	8.1187e-05	0.00132262	2819	294	0.0320445	1.74047e-11
2048	15	37962916	39238840	2412	255	7.27335e-05	0.00194936	2412	255	0.00948736	0.00710922
2049	15	39238841	40604780	2114	222	6.2245e-05	0.00396945	2114	222	0.0187002	4.32802e-05
2050	15	40604781	42332685	2639	214	4.06994e-05	0.0336677	2639	214	0.0124753	0.000398076
2051	15	42332686	44987755	1499	135	2.84993e-05	0.0533702	1499	135	0.00621826	0.0332637
2052	15	44987756	46022642					1355	110	0.00155127	0.25898
2054	15	46884072	47693316					1000	65	0.00301719	0.118924
2055	15	47693317	49260006	1370	148	5.22254e-05	0.00367372	1370	148	0.00928432	0.00837869
2056	15	49260007	50195876					1677	73	0.00839761	0.00367071
2057	15	50195877	51605477	2951	174	4.81772e-05	0.00989005	2951	174	0.0161057	9.20896e-05
2058	15	51605478	53263126	2701	214	1.31439e-05	0.257851	2701	214	0.0238604	9.34504e-08
2059	15	53263127	54332799	2385	200	3.02388e-05	0.0758481	2385	200	0.00438096	0.0741782
2060	15	54332800	55136717	2429	190	3.46939e-05	0.0479711	2429	190	0.0405826	2.9879e-18
2061	15	55136718	56322588	2644	193	6.06079e-05	0.0030124	2644	193	0.00898738	0.00186862
2062	15	56322589	57641164	2082	126	1.51015e-05	0.175145	2082	126	0.00688628	0.0255071
2063	15	57641165	58712954	2524	285	2.25596e-05	0.17481	2524	285	0.0260967	1.88125e-09
2064	15	58712955	59901116	1786	212	4.63337e-05	0.019295
2065	15	59901117	61130595	1846	239	4.48169e-05	0.0283832	1846	239	0.0151351	0.000397399
2066	15	61130596	62106138	2183	295	0.000129941	2.29792e-06	2183	295	0.00500444	0.0269353
2067	15	62106139	63218978	2251	261	8.86425e-05	0.000314583	2251	261	0.00562279	0.0173392
2068	15	63218979	64339945	2261	197	2.05127e-05	0.156239	2261	197	0.0182642	2.9616e-05
2069	15	64339946	66355634	2132	179	7.92674e-06	0.32629	2132	179	0	0.320042
2070	15	66355635	67396520	2618	260	6.31226e-05	0.00592644	2618	260	0.0381613	2.09037e-14
2071	15	67396521	69089815	2622	232	9.16956e-05	0.000109945	2622	232	0.0148983	0.000643182
2072	15	69089816	70767983	2780	300	0.000133142	1.66815e-06	2780	300	0.0273574	2.62427e-07	0.218791	0.218955	0
2073	15	70767984	72058129					1963	221	0.0159691	0.000154349
2074	15	72058130	73375718	1281	114	1.65192e-06	0.434622	1281	114	0	0.357407
2075	15	73375719	74458113					1817	188	0.0216991	1.71671e-06
2076	15	74458114	76401952	2053	224	2.88507e-05	0.0957522	2053	224	0.0179929	3.04805e-05
2077	15	76401953	77897163	2086	121	3.46684e-05	0.0218351
2078	15	77897164	78514101	1399	162	4.59306e-05	0.0107219	1399	162	0	0.429139
2079	15	78514102	79292536	1482	166	9.3525e-05	9.48292e-06	1482	166	0.0157486	8.85422e-05
2080	15	79292537	79998206	1615	193	5.62907e-05	0.00508984	1615	193	0.017045	2.17236e-05
[truncated: 411 more rows]

## Sheet: ST6 CC lead variant effects vs 
loci_n	Annotated gene	Lead loci from CC GWAS	rsID	CC GWAS			DCM GWAS			HCM GWAS				Note: loci_n, locus number corresponding to cross-trait analysis; Annotated gene, gene prioritized at the locus through integrative mapping approaches; Lead loci, chromosomal position of the lead variant (CHR:POS:A1:A2); rsID, dbSNP identifier for the lead variant; CC GWAS, effect size (BETA), standard error (SE), and P-value (P) from the case–case GWAS comparing DCM and HCM; DCM GWAS, effect siz…
				BETA	SE	P	BETA	CI	P	BETA	CI	P
1	SKI	1:2156362:A:G	rs2460000	0.0578	0.00915	2.62e-10	0.095	[0.06; 0.13]	1.28e-06	-0.101	[-0.15; -0.05]	4.15e-05
2	PRDM16	1:3199217:T:C	rs16823802	0.0419	0.00915	4.77e-06	0.102	[0.04; 0.17]	0.00265	-0.154	[-0.24; -0.07]	0.000591
3	RNF207/RPL22	1:6278414:G:A	rs709209	0.0507	0.00871	5.86e-09	0.073	[0.04; 0.11]	3.86e-05	-0.103	[-0.15; -0.05]	3.44e-05
4	HSPB7	1:16338925:G:T	rs1763605	0.146	0.00871	5.2e-63	0.234	[0.2; 0.27]	8.61e-37	-0.251	[-0.29; -0.21]	2.43e-29
6	MAST2	1:46605728:C:A	rs1707334	0.0528	0.00886	2.47e-09	0.091	[0.06; 0.12]	1.53e-07	-0.077	[-0.12; -0.03]	0.000816
8	NFIA	1:61881191:G:A	rs2261792	0.0628	0.00886	1.35e-12	0.127	[0.09; 0.16]	6.04e-12	-0.08	[-0.13; -0.03]	0.000584
9	NEXN/GIPC2	1:78559044:C:T	rs587143	0.0583	0.00871	2.09e-11	0.092	[0.05; 0.13]	2.03e-06	-0.121	[-0.17; -0.07]	1.99e-06
11	NOS1AP	1:162023184:T:C	rs60129000	0.0504	0.00886	1.25e-08	0.072	[0.03; 0.11]	0.000382	-0.109	[-0.16; -0.06]	8.88e-06
13	PROX1	1:214285155:T:C	rs74139612	0.0617	0.00886	3.29e-12	0.213	[0.13; 0.3]	1.55e-06	-0.257	[-0.36; -0.16]	4.83e-07
14	OBSCN	1:228494790:G:A	rs435776	0.052	0.00871	2.26e-09	0.076	[0.04; 0.11]	4.84e-06	-0.088	[-0.13; -0.04]	7.37e-05
15	ACTN2	1:236853167:A:G	rs4659701	0.0699	0.00886	2.88e-15	0.141	[0.11; 0.18]	1.64e-15	-0.082	[-0.13; -0.04]	0.000403
16	LPIN1/E2F6	2:11592294:T:G	rs6751915	0.0666	0.00871	2.04e-14	0.088	[0.05; 0.12]	3.6e-07	-0.134	[-0.18; -0.09]	1.31e-08
17	STRN	2:37090897:A:G	rs2540926	0.0838	0.00907	2.31e-20	0.115	[0.08; 0.15]	7.15e-11	-0.156	[-0.2; -0.11]	4.88e-11
20	TMEM182	2:103426177:T:C	rs2540277	0.0685	0.00871	3.7e-15	0.192	[0.12; 0.26]	2.67e-08	-0.278	[-0.38; -0.18]	2.31e-08
23	TTN	2:179759434:A:G	rs6747402	0.0497	0.00871	1.18e-08	0.03	[0; 0.06]	0.0727	-0.129	[-0.17; -0.09]	4.14e-09
24	SPATS2L	2:201229473:G:A	rs295129	0.0575	0.00871	4.06e-11	0.093	[0.06; 0.13]	2.08e-08	-0.087	[-0.13; -0.04]	8.33e-05
27	RAF1	3:12842223:G:T	rs4642101	0.0644	0.00871	1.45e-13	0.114	[0.08; 0.15]	3.73e-11	-0.095	[-0.14; -0.05]	3.9e-05
28	SLC6A6	3:14276982:A:G	rs17226476	0.1	0.00871	9.41e-31	0.177	[0.14; 0.21]	6.07e-22	-0.194	[-0.25; -0.14]	2.72e-12
31	TKT	3:53282990:C:T	rs62256002	0.0669	0.00886	4.24e-14	0.183	[0.14; 0.23]	1.83e-15	-0.105	[-0.17; -0.04]	0.0019
32	MITF	3:69807905:G:T	rs4855323	0.0505	0.00871	6.48e-09	0.093	[0.05; 0.13]	6.35e-06	-0.098	[-0.15; -0.05]	0.000148
34	MLF1	3:158311547:G:A	rs1836688	0.0643	0.00871	1.57e-13	0.111	[0.08; 0.14]	1.86e-11	-0.087	[-0.13; -0.04]	5.84e-05
36	FNDC3B	3:171800256:A:G	rs4894803	0.0744	0.00871	1.23e-17	0.077	[0.04; 0.11]	6.56e-06	-0.171	[-0.22; -0.13]	2.19e-13
38	PROM1	4:16035795:C:A	rs13133886	0.0577	0.00871	3.41e-11	0.105	[0.07; 0.14]	8.67e-08	-0.107	[-0.16; -0.06]	3.2e-05
39	GNRHR/UBA6	4:68556786:G:A	rs9998837	0.049	0.00871	1.86e-08	0.063	[0.03; 0.1]	0.00019	-0.092	[-0.14; -0.05]	2.73e-05
40	PDLIM5	4:95463956:G:T	rs2452581	0.0518	0.00886	5.04e-09	0.093	[0.05; 0.13]	1.13e-05	-0.104	[-0.16; -0.05]	8.82e-05
44	SLC1A3	5:36624602:T:C	rs11954014	0.0535	0.00886	1.52e-09	0.059	[0.02; 0.09]	0.000926	-0.112	[-0.15; -0.07]	3.44e-07
45	PLK2	5:57011404:G:A	rs2191446	0.0843	0.00886	1.68e-21	0.121	[0.08; 0.16]	3.85e-09	-0.214	[-0.27; -0.16]	8.25e-14
46	UBE2D2/TMEM173/DNAJC18/PROB1	5:138705588:A:G	rs6596471	0.0763	0.00871	1.89e-18	0.112	[0.08; 0.15]	1.65e-09	-0.16	[-0.21; -0.11]	2.04e-10
49	CDKN1A	6:36647289:G:A	rs3176326	0.119	0.00892	1.42e-40	0.187	[0.14; 0.23]	7.74e-18	-0.267	[-0.32; -0.22]	3.18e-24
50	MLIP	6:53957588:T:C	rs625899	0.0585	0.00871	1.79e-11	0.11	[0.07; 0.15]	1e-09	-0.09	[-0.14; -0.04]	0.000253
52	PLN	6:118993632:A:C	rs11756438	0.0811	0.00886	5.45e-20	0.081	[0.05; 0.12]	2.07e-06	-0.174	[-0.22; -0.13]	1.65e-15
58	FLNC	7:128445266:T:C	rs1565630	0.0915	0.00871	8.18e-26	0.191	[0.15; 0.23]	3.06e-18	-0.182	[-0.24; -0.13]	1.46e-10
61	XPO7	8:21799245:G:A	rs28640935	0.0498	0.00886	1.82e-08	0.035	[-0.02; 0.09]	0.207	-0.199	[-0.26; -0.14]	2.96e-10
63	FBXO32	8:124552303:G:A	rs7835298	0.0565	0.00871	8.38e-11	0.075	[0.04; 0.11]	5.76e-06	-0.103	[-0.15; -0.06]	3.28e-06
64	MTSS1	8:125861374:C:T	rs7461129	0.0873	0.00871	1.22e-23	0.142	[0.11; 0.18]	4.67e-15	-0.152	[-0.2; -0.11]	8.19e-11
66	TMEM245	9:111865232:C:A	rs7028081	0.0505	0.00871	6.39e-09	0.085	[0.04; 0.13]	0.000807	-0.147	[-0.21; -0.09]	2.16e-06
68	KLF6	10:4101955:G:A	rs2935284	0.0575	0.00871	4.09e-11	0.087	[0.04; 0.13]	5.8e-05	-0.154	[-0.21; -0.1]	1.76e-07
69	SVIL	10:29697239:G:A	rs2887242	0.0586	0.00871	1.62e-11	0.098	[0.06; 0.13]	1.75e-07	-0.115	[-0.17; -0.06]	1.07e-05
71	SYNPO2L	10:75409877:C:T	rs2177843	0.0922	0.00871	3.14e-26	0.166	[0.12; 0.21]	2e-12	-0.235	[-0.29; -0.18]	2.8e-15
74	VTI1A	10:114505465:G:A	rs7918405	0.0716	0.00871	2e-16	0.054	[0.01; 0.09]	0.00725	-0.199	[-0.25; -0.15]	4.61e-17
75	BAG3	10:121433675:C:T	rs72842207	0.192	0.00886	1.54e-104	0.358	[0.31; 0.4]	7.72e-58	-0.373	[-0.42; -0.32]	2.2e-49
77	RRAS2	11:14380828:G:A	rs10832246	0.0659	0.00871	3.82e-14	0.075	[0.04; 0.11]	1.17e-05	-0.139	[-0.18; -0.1]	7.34e-10
79	PGR	11:101010503:G:A	rs676904	0.0493	0.00886	2.52e-08	0.069	[0.03; 0.1]	7.5e-05	-0.088	[-0.13; -0.04]	8.4e-05
81	PDE3A	12:20588575:G:A	rs10841523	0.0497	0.00871	1.16e-08	0.051	[0.02; 0.08]	0.00289	-0.113	[-0.16; -0.07]	8.99e-07
82	SSPN	12:26348304:C:T	rs58747679	0.0543	0.00886	8.43e-10	0.068	[0.03; 0.1]	0.000178	-0.118	[-0.17; -0.07]	1.3e-06
83	PKP2	12:32980161:G:T	rs2045172	0.0526	0.00871	1.51e-09	0.109	[0.06; 0.16]	8.8e-06	-0.125	[-0.18; -0.07]	3.19e-05
84	TBX5	12:115381071:C:T	rs7132327	0.0751	0.00886	2.18e-17	0.068	[0.03; 0.11]	0.000343	-0.205	[-0.26; -0.16]	7.06e-16
85	HSPB8	12:119610485:G:A	rs722306	0.0491	0.00871	1.75e-08	0.122	[0.08; 0.16]	5.19e-09	-0.065	[-0.12; -0.01]	0.0134
89	ADPRHL1	13:114078558:A:C	rs41306688	0.0634	0.00886	8.25e-13	0.099	[-0.01; 0.21]	0.08	-0.471	[-0.59; -0.35]	3.04e-15
90	FERMT2	14:53331679:T:C	rs17694496	0.0625	0.00871	7.11e-13	0.103	[0.06; 0.15]	2.56e-06	-0.149	[-0.2; -0.09]	6.74e-08
92	FOXN3	14:88946053:G:T	rs28617592	0.0498	0.00886	1.87e-08	0.165	[0.07; 0.26]	0.000473	-0.225	[-0.33; -0.12]	1.12e-05
94	ADAMTS7	15:79053014:G:A	rs2002854	0.0723	0.00886	3.38e-16	0.12	[0.08; 0.16]	2.28e-10	-0.129	[-0.18; -0.08]	1.22e-07
95	AKAP13	15:85248133:G:A	rs35316992	0.0756	0.00871	4.01e-18	0.085	[0.05; 0.12]	4.43e-06	-0.182	[-0.23; -0.13]	1.19e-13
96	UBE2I/LMF1	16:970814:T:C	rs9888914	0.0599	0.00871	5.99e-12	0.124	[0.09; 0.16]	8.26e-13	-0.068	[-0.11; -0.02]	0.00251
97	SLC9A3R2	16:2191734:G:A	rs258281	0.0479	0.00871	3.79e-08	0.071	[0.03; 0.11]	0.00148	-0.138	[-0.2; -0.08]	7.07e-06
98	CREBBP/SRL	16:4257286:C:T	rs9924822	0.0533	0.00886	1.81e-09	0.074	[0.04; 0.11]	2.09e-05	-0.094	[-0.14; -0.05]	2.04e-05
99	NFATC3	16:68036666:C:A	rs8059305	0.0513	0.00871	3.8e-09	0.087	[0.04; 0.13]	0.000114	-0.136	[-0.2; -0.08]	8.92e-06
101	MAPT	17:44032915:T:C	rs17571739	0.0764	0.00871	1.66e-18	0.061	[0.01; 0.11]	0.00946	-0.234	[-0.28; -0.18]	3.85e-20
102	HLF	17:53382829:T:C	rs3794752	0.0585	0.00871	1.75e-11	0.08	[0.04; 0.12]	1.62e-05	-0.128	[-0.18; -0.08]	2.84e-07
103	PRKCA	17:64308473:T:C	rs4577128	0.106	0.00871	5.46e-34	0.126	[0.09; 0.16]	2.77e-14	-0.214	[-0.26; -0.17]	3.26e-21
105	FHOD3	18:34223566:T:C	rs2644262	0.128	0.00871	6.1e-49	0.127	[0.09; 0.17]	3.39e-10	-0.329	[-0.38; -0.28]	1.79e-43
106	NEDD4L	18:55922789:A:G	rs6566955	0.0747	0.00871	9.27e-18	0.125	[0.09; 0.16]	1.73e-11	-0.132	[-0.18; -0.09]	2.93e-08
107	DMPK	19:46312077:A:G	rs12460541	0.0656	0.00886	1.23e-13	0.067	[0.03; 0.1]	0.000194	-0.15	[-0.19; -0.1]	6.01e-11
108	NCOA6	20:33529766:T:G	rs2273684	0.0519	0.00871	2.44e-09	0.07	[0.04; 0.1]	2.44e-05	-0.092	[-0.13; -0.05]	2.25e-05
109	BACH1	21:30530131:A:G	rs62222424	0.0814	0.00886	3.95e-20	0.272	[0.2; 0.35]	2.7e-12	-0.279	[-0.37; -0.19]	1.21e-09
110	SH3BGR/BRWD1	21:40569508:T:C	rs62222988	0.0577	0.00886	7.08e-11	0.093	[0.06; 0.13]	1.15e-07	-0.09	[-0.13; -0.05]	5.73e-05
111	SMARCB1	22:24161717:T:C	rs5760054	0.116	0.00886	2.8e-39	0.179	[0.14; 0.22]	7.26e-16	-0.268	[-0.32; -0.22]	6.62e-25

## Sheet: ST7 Genetic correlations CC GWA
	CC_GWAS	-Ecc	-Ell	Err	LVEF	LVEDVi	LVESVi	LVMi	LVconc	meanWT	maxWT
-Ecc	-0.705	1	-0.6448	0.858	0.9304	-0.4631	-0.7715	-0.1762	0.3883	0.1185	0.1699
-Ell	-0.2964	-0.6448	1	0.6125	0.5918	-0.1007	-0.3519	-0.1334	-0.0167	-0.1283	-0.094
Err	-0.6306	0.858	0.6125	1	0.8359	-0.3043	-0.6214	-0.0104	0.3677	0.2672	0.324
LVEF	-0.6256	0.9304	0.5918	0.8359	1	-0.4902	-0.8247	-0.2922	0.3047	0.0111	0.1314
LVEDVi	0.4782	-0.4631	-0.1007	-0.3043	-0.4902	1	0.8964	0.6625	-0.5203	0.059	0.0648
LVESVi	0.6242	-0.7715	-0.3519	-0.6214	-0.8247	0.8964	1	0.5793	-0.4906	0.0315	-0.022
LVMi	0.0295	-0.1762	-0.1334	-0.0104	-0.2922	0.6625	0.5793	1	0.28	0.751	0.6818
LVconc	-0.5745	0.3883	-0.0167	0.3677	0.3047	-0.5203	-0.4906	0.28	1	0.7792	0.7005
meanWT	-0.3005	0.1185	-0.1283	0.2672	0.0111	0.059	0.0315	0.751	0.7792	1	0.8445
maxWT	-0.4283	0.1699	-0.094	0.324	0.1314	0.0648	-0.022	0.6818	0.7005	0.8445	1
Note: CMP, cardiomyopathy; CC-GWAS, case-case genome-wide association study; -Ecc, negative value of global circumferential strain; Ell, global longitudinal strain; Err, global radial strain; LVEF, left ventricular ejection fraction; LVEDVi, left ventricular end-diastolic volume indexed to body-mass index; LVESVi, left ventricular end-systolic volume indexed to body-mass index; LVMi, left ventric…

## Sheet: ST8 Pathway enrichment of prior
N	source	term_name	term_id	adjusted_p_value	negative_log10_of_adjusted_p_value	term_size	query_size	intersection_size	effective_domain_size	intersections	group_id_name	OR
1	GO:MF	actin binding	GO:0003779	0.000301475	3.52075	448	72	11	20196	NEXN,ACTN2,TTN,PDLIM5,FLNC,MTSS1,SVIL,SYNPO2L,FERMT2,MAPT,FHOD3	actin binding	8.12383	N, row number; source, the database or ontology source of the gene set (e.g., GO:MF for Molecular Function, GO:BP for Biological Process); term_name, the name of the enriched gene set; term_id, the unique identifier for the term (e.g., Gene Ontology accession); adjusted_p_value, the Benjamini–Hochberg corrected P-value for enrichment; negative_log10_of_adjusted_p_value, the –log₁₀ transformation …
2	GO:MF	cytoskeletal protein binding	GO:0008092	0.00126923	2.89646	1008	72	15	20196	HSPB7,MAST2,NEXN,OBSCN,ACTN2,TTN,PROM1,PDLIM5,FLNC,MTSS1,SVIL,SYNPO2L,FERMT2,MAPT,FHOD3	cytoskeletal protein binding	5.06996
3	GO:MF	protein binding	GO:0005515	0.00303918	2.51724	14865	72	68	20196	SKI,PRDM16,RNF207,HSPB7,MAST2,NFIA,NEXN,NOS1AP,PROX1,OBSCN,ACTN2,LPIN1,STRN,TMEM182,TTN,SPATS2L,RAF1,TKT,MITF,MLF1,FNDC3B,PROM1,PDLIM5,SLC1A3,PLK2,UBE2D2,CDKN1A,MLIP,PLN,FLNC,XPO7,FBXO32,MTSS1,KLF6,SVIL,SYNPO2L,VTI1A,BAG3,RRAS2,PGR,PDE3A,PKP2,TBX5,HSPB8,FERMT2,FOXN3,ADAMTS7,AKAP13,UBE2I,CREBBP,NFATC3,MAPT,HLF,PRKCA,FHOD3,NEDD4L,DMPK,NCOA6,BACH1,SH3BGR,SMARCB1,RPL22,GIPC2,E2F6,UBA6,SRL,BRWD1,DNAJC…	protein binding	6.12009
4	GO:MF	transcription factor binding	GO:0008134	0.00504868	2.29682	600	72	11	20196	SKI,PRDM16,NFIA,PROX1,STRN,PGR,TBX5,UBE2I,CREBBP,NCOA6,SMARCB1	transcription factor binding	5.98082
5	GO:MF	actin filament binding	GO:0051015	0.00570202	2.24397	209	72	7	20196	NEXN,ACTN2,TTN,FLNC,SVIL,FERMT2,FHOD3	actin binding	10.621
6	GO:MF	structural constituent of muscle	GO:0008307	0.00892854	2.04922	42	72	4	20196	NEXN,OBSCN,ACTN2,TTN	structural constituent of muscle	31.0929
7	GO:MF	transcription regulator activity	GO:0140110	0.0239512	1.62067	1962	72	19	20196	SKI,PRDM16,NFIA,PROX1,ACTN2,LPIN1,MITF,KLF6,PGR,PDE3A,TBX5,FOXN3,CREBBP,NFATC3,HLF,NCOA6,BACH1,SMARCB1,E2F6	transcription regulator activity	3.35446
8	GO:MF	DNA-binding transcription activator activity, RNA polymerase II-specific	GO:0001228	0.0264738	1.57718	472	72	9	20196	PRDM16,NFIA,MITF,KLF6,PGR,TBX5,NFATC3,HLF,BACH1	DNA-binding transcription activator activity, RNA polymerase II-specific	6.06634
9	GO:MF	DNA-binding transcription activator activity	GO:0001216	0.0291902	1.53476	478	72	9	20196	PRDM16,NFIA,MITF,KLF6,PGR,TBX5,NFATC3,HLF,BACH1	DNA-binding transcription activator activity	5.9869
10	GO:MF	DNA-binding transcription factor binding	GO:0140297	0.0353358	1.45178	490	72	9	20196	SKI,PRDM16,NFIA,PROX1,STRN,TBX5,CREBBP,NCOA6,SMARCB1	DNA-binding transcription factor binding	5.83398
11	GO:MF	enzyme binding	GO:0019899	0.0622739	1.20569	2105	72	19	20196	SKI,MAST2,NOS1AP,STRN,TTN,RAF1,PDLIM5,UBE2D2,CDKN1A,PLN,XPO7,PGR,PKP2,FERMT2,AKAP13,UBE2I,MAPT,PRKCA,NCOA6	enzyme binding	3.09993
12	GO:MF	protein-containing complex binding	GO:0044877	0.0865416	1.06278	1279	72	14	20196	NEXN,ACTN2,STRN,TTN,CDKN1A,FLNC,SVIL,BAG3,FERMT2,CREBBP,MAPT,PRKCA,FHOD3,SMARCB1	protein-containing complex binding	3.59856
13	GO:MF	DNA-binding transcription repressor activity, RNA polymerase II-specific	GO:0001227	0.0955641	1.01971	326	72	7	20196	SKI,PRDM16,PROX1,MITF,NFATC3,BACH1,E2F6	DNA-binding transcription repressor activity, RNA polymerase II-specific	6.68604
14	GO:MF	cell adhesion molecule binding	GO:0050839	0.0986111	1.00607	561	72	9	20196	NEXN,OBSCN,ACTN2,PROM1,PDLIM5,BAG3,PKP2,FERMT2,PRKCA	cell adhesion molecule binding	5.06522
15	GO:MF	DNA-binding transcription repressor activity	GO:0001217	0.112938	0.947159	335	72	7	20196	SKI,PRDM16,PROX1,MITF,NFATC3,BACH1,E2F6	DNA-binding transcription repressor activity	6.49962
16	GO:MF	DNA-binding transcription factor activity, RNA polymerase II-specific	GO:0000981	0.162465	0.789239	1359	72	14	20196	SKI,PRDM16,NFIA,PROX1,MITF,KLF6,PGR,PDE3A,TBX5,FOXN3,NFATC3,HLF,BACH1,E2F6	DNA-binding transcription factor activity, RNA polymerase II-specific	3.37016
17	GO:MF	protein serine kinase activity	GO:0106310	0.174982	0.757007	360	72	7	20196	MAST2,OBSCN,TTN,RAF1,PLK2,PRKCA,DMPK	protein serine kinase activity	6.03168
18	GO:MF	cis-regulatory region sequence-specific DNA binding	GO:0000987	0.178143	0.749231	1205	72	13	20196	SKI,PRDM16,NFIA,PROX1,MITF,KLF6,PGR,TBX5,FOXN3,NFATC3,HLF,BACH1,E2F6	cis-regulatory region sequence-specific DNA binding	3.49954
19	GO:MF	actinin binding	GO:0042805	0.184188	0.734738	37	72	3	20196	TTN,PROM1,PDLIM5	actinin binding	25.6905
20	GO:MF	phosphatidylinositol phosphate binding	GO:1901981	0.28037	0.552269	181	72	5	20196	OBSCN,ACTN2,SVIL,FERMT2,MAPT	phosphatidylinositol phosphate binding	8.45828
21	GO:MF	DNA-binding transcription factor activity	GO:0003700	0.308956	0.510103	1448	72	14	20196	SKI,PRDM16,NFIA,PROX1,MITF,KLF6,PGR,PDE3A,TBX5,FOXN3,NFATC3,HLF,BACH1,E2F6	DNA-binding transcription factor activity, RNA polymerase II-specific	3.14601
22	GO:MF	double-stranded DNA binding	GO:0003690	0.3399	0.468648	1640	72	15	20196	SKI,PRDM16,NFIA,PROX1,MITF,KLF6,PGR,TBX5,FOXN3,NFATC3,MAPT,HLF,BACH1,SMARCB1,E2F6	double-stranded DNA binding	2.99579
23	GO:MF	transcription coactivator activity	GO:0003713	0.349829	0.456144	290	72	6	20196	PRDM16,ACTN2,LPIN1,CREBBP,NCOA6,SMARCB1	transcription coactivator activity	6.35083
24	GO:MF	phosphatidylinositol bisphosphate binding	GO:1902936	0.370749	0.43092	109	72	4	20196	OBSCN,ACTN2,SVIL,MAPT	phosphatidylinositol phosphate binding	11.2151
25	GO:MF	sequence-specific DNA binding	GO:0043565	0.373849	0.427304	1655	72	15	20196	SKI,PRDM16,NFIA,PROX1,MITF,KLF6,PGR,TBX5,FOXN3,NFATC3,MAPT,HLF,BACH1,SMARCB1,E2F6	sequence-specific DNA binding	2.96598
26	GO:MF	transcription cis-regulatory region binding	GO:0000976	0.391819	0.406915	1483	72	14	20196	SKI,PRDM16,NFIA,PROX1,MITF,KLF6,PGR,TBX5,FOXN3,NFATC3,HLF,BACH1,SMARCB1,E2F6	cis-regulatory region sequence-specific DNA binding	3.0653
27	GO:MF	transcription regulatory region nucleic acid binding	GO:0001067	0.397078	0.401124	1485	72	14	20196	SKI,PRDM16,NFIA,PROX1,MITF,KLF6,PGR,TBX5,FOXN3,NFATC3,HLF,BACH1,SMARCB1,E2F6	transcription regulatory region nucleic acid binding	3.06081
28	GO:MF	cell-cell adhesion mediator activity	GO:0098632	0.504207	0.297391	52	72	3	20196	NEXN,PDLIM5,PKP2	cell-cell adhesion mediator activity	17.8128
29	GO:MF	RNA polymerase II cis-regulatory region sequence-specific DNA binding	GO:0000978	0.5351	0.271565	1182	72	12	20196	SKI,PRDM16,NFIA,PROX1,MITF,KLF6,PGR,TBX5,NFATC3,HLF,BACH1,E2F6	RNA polymerase II cis-regulatory region sequence-specific DNA binding	3.24
30	GO:MF	protein serine/threonine kinase activity	GO:0004674	0.560343	0.251546	438	72	7	20196	MAST2,OBSCN,TTN,RAF1,PLK2,PRKCA,DMPK	protein serine/threonine kinase activity	4.92061
31	GO:MF	titin binding	GO:0031432	0.56732	0.246172	13	72	2	20196	OBSCN,ACTN2	titin binding	52.2416
32	GO:MF	sequence-specific double-stranded DNA binding	GO:1990837	0.581787	0.235236	1544	72	14	20196	SKI,PRDM16,NFIA,PROX1,MITF,KLF6,PGR,TBX5,FOXN3,NFATC3,HLF,BACH1,SMARCB1,E2F6	sequence-specific double-stranded DNA binding	2.93347
33	GO:MF	protein kinase activity	GO:0004672	0.667137	0.175785	586	72	8	20196	MAST2,OBSCN,TTN,RAF1,PLK2,CDKN1A,PRKCA,DMPK	protein kinase activity	4.22708
34	GO:MF	muscle alpha-actinin binding	GO:0051371	0.760185	0.119081	15	72	2	20196	TTN,PDLIM5	muscle alpha-actinin binding	44.2
35	GO:MF	ligand-activated transcription factor activity	GO:0098531	0.76497	0.116355	60	72	3	20196	PGR,PDE3A,BACH1	ligand-activated transcription factor activity	15.3066
36	GO:MF	protein-folding chaperone binding	GO:0051087	0.822651	0.0847842	135	72	4	20196	RNF207,BAG3,MAPT,DNAJC18	protein-folding chaperone binding	8.97755
37	GO:MF	RNA polymerase II-specific DNA-binding transcription factor binding	GO:0061629	0.89648	0.0474593	348	72	6	20196	PROX1,STRN,TBX5,CREBBP,NCOA6,SMARCB1	RNA polymerase II-specific DNA-binding transcription factor binding	5.25837
38	GO:MF	transmembrane transporter binding	GO:0044325	0.990571	0.00411452	142	72	4	20196	RNF207,ACTN2,PKP2,NEDD4L	transmembrane transporter binding	8.51918
39	GO:MF	SNARE binding	GO:0000149	1	0	105	72	1	20196	VTI1A	SNARE binding	2.71127
40	GO:MF	transketolase or transaldolase activity	GO:0016744	1	0	5	72	1	20196	TKT	transketolase or transaldolase activity	70.8451
41	GO:MF	acyltransferase activity	GO:0016746	1	0	738	72	4	20196	UBE2D2,UBE2I,CREBBP,NEDD4L	acyltransferase activity	1.55393
42	GO:MF	acyltransferase activity, transferring groups other than amino-acyl groups	GO:0016747	1	0	229	72	1	20196	CREBBP	acyltransferase activity, transferring groups other than amino-acyl groups	1.22906
43	GO:MF	aminoacyltransferase activity	GO:0016755	1	0	503	72	3	20196	UBE2D2,UBE2I,NEDD4L	aminoacyltransferase activity	1.70643
44	GO:MF	transferase activity, transferring phosphorus-containing groups	GO:0016772	1	0	954	72	9	20196	MAST2,OBSCN,TTN,RAF1,PLK2,CDKN1A,PRKCA,DMPK,UBA6	transferase activity, transferring phosphorus-containing groups	2.89932
45	GO:MF	phosphotransferase activity, alcohol group as acceptor	GO:0016773	1	0	696	72	8	20196	MAST2,OBSCN,TTN,RAF1,PLK2,CDKN1A,PRKCA,DMPK	phosphotransferase activity, alcohol group as acceptor	3.53125
46	GO:MF	nucleotidyltransferase activity	GO:0016779	1	0	151	72	1	20196	UBA6	nucleotidyltransferase activity	1.87549
47	GO:MF	transferase activity, transferring sulphur-containing groups	GO:0016782	1	0	75	72	1	20196	UBA6	transferase activity, transferring sulphur-containing groups	3.81614
48	GO:MF	sulfurtransferase activity	GO:0016783	1	0	12	72	1	20196	UBA6	sulfurtransferase activity	25.7529
49	GO:MF	hydrolase activity	GO:0016787	1	0	2476	72	5	20196	LPIN1,RRAS2,PDE3A,ADPRHL1,ADAMTS7	hydrolase activity	0.53314
50	GO:MF	hydrolase activity, acting on ester bonds	GO:0016788	1	0	776	72	2	20196	LPIN1,PDE3A	hydrolase activity, acting on ester bonds	0.714286
51	GO:MF	transferase activity, transferring one-carbon groups	GO:0016741	1	0	230	72	1	20196	PRDM16	transferase activity, transferring one-carbon groups	1.22363
52	GO:MF	phosphatase activity	GO:0016791	1	0	281	72	1	20196	LPIN1	phosphatase activity	0.998189
53	GO:MF	hydrolase activity, hydrolyzing N-glycosyl compounds	GO:0016799	1	0	40	72	1	20196	ADPRHL1	hydrolase activity, hydrolyzing N-glycosyl compounds	7.25352
54	GO:MF	hydrolase activity, acting on acid anhydrides	GO:0016817	1	0	798	72	1	20196	RRAS2	hydrolase activity, acting on acid anhydrides	0.341545
55	GO:MF	hydrolase activity, acting on acid anhydrides, in phosphorus-containing anhydrides	GO:0016818	1	0	798	72	1	20196	RRAS2	hydrolase activity, acting on acid anhydrides, in phosphorus-containing anhydrides	0.341545
56	GO:MF	ligase activity	GO:0016874	1	0	175	72	1	20196	UBA6	ligase activity	1.61486
57	GO:MF	ligase activity, forming carbon-sulfur bonds	GO:0016877	1	0	42	72	1	20196	UBA6	ligase activity, forming carbon-sulfur bonds	6.899
58	GO:MF	nuclear receptor binding	GO:0016922	1	0	138	72	3	20196	PROX1,STRN,NCOA6	nuclear receptor binding	6.43768
59	GO:MF	myosin phosphatase regulator activity	GO:0017020	1	0	3	72	1	20196	DMPK	myosin phosphatase regulator activity	141.704
60	GO:MF	purine nucleotide binding	GO:0017076	1	0	1993	72	12	20196	MAST2,OBSCN,TTN,RAF1,PLK2,UBE2D2,RRAS2,UBE2I,PRKCA,DMPK,UBA6,SRL	purine nucleotide binding	1.8317
61	GO:MF	sodium channel regulator activity	GO:0017080	1	0	38	72	2	20196	PKP2,NEDD4L	sodium channel regulator activity	15.9429
62	GO:MF	ribonucleoside triphosphate phosphatase activity	GO:0017111	1	0	738	72	1	20196	RRAS2	ribonucleoside triphosphate phosphatase activity	0.370497
63	GO:MF	SH3 domain binding	GO:0017124	1	0	121	72	2	20196	MAPT,SH3BGR	SH3 domain binding	4.80312
64	GO:MF	hydrolase activity, acting on glycosyl bonds	GO:0016798	1	0	132	72	1	20196	ADPRHL1	hydrolase activity, acting on glycosyl bonds	2.14955
65	GO:MF	guanyl nucleotide binding	GO:0019001	1	0	410	72	2	20196	RRAS2,SRL	guanyl nucleotide binding	1.38067
66	GO:MF	transferase activity	GO:0016740	1	0	2346	72	15	20196	PRDM16,MAST2,OBSCN,TTN,RAF1,TKT,PLK2,UBE2D2,CDKN1A,UBE2I,CREBBP,PRKCA,NEDD4L,DMPK,UBA6	transferase activity	2.00874
67	GO:MF	glutamate binding	GO:0016595	1	0	9	72	1	20196	SLC1A3	glutamate binding	35.4155
68	GO:MF	secondary active transmembrane transporter activity	GO:0015291	1	0	284	72	2	20196	SLC6A6,SLC1A3	secondary active transmembrane transporter activity	2.01033
69	GO:MF	symporter activity	GO:0015293	1	0	147	72	2	20196	SLC6A6,SLC1A3	symporter activity	3.93675
70	GO:MF	solute:monoatomic cation symporter activity	GO:0015294	1	0	117	72	2	20196	SLC6A6,SLC1A3	solute:monoatomic cation symporter activity	4.97118
71	GO:MF	monoatomic anion:monoatomic cation symporter activity	GO:0015296	1	0	25	72	1	20196	SLC6A6	monoatomic anion:monoatomic cation symporter activity	11.7958
72	GO:MF	inorganic molecular entity transmembrane transporter activity	GO:0015318	1	0	735	72	2	20196	SLC6A6,SLC1A3	inorganic molecular entity transmembrane transporter activity	0.755837
73	GO:MF	secondary active monocarboxylate transmembrane transporter activity	GO:0015355	1	0	19	72	1	20196	SLC6A6	secondary active monocarboxylate transmembrane transporter activity	15.7324
74	GO:MF	solute:sodium symporter activity	GO:0015370	1	0	80	72	2	20196	SLC6A6,SLC1A3	solute:sodium symporter activity	7.34286
75	GO:MF	monoatomic anion:sodium symporter activity	GO:0015373	1	0	18	72	1	20196	SLC6A6	monoatomic anion:sodium symporter activity	16.6587
76	GO:MF	chloride:monoatomic cation symporter activity	GO:0015377	1	0	22	72	1	20196	SLC6A6	chloride:monoatomic cation symporter activity	13.4829
77	GO:MF	sodium:chloride symporter activity	GO:0015378	1	0	16	72	1	20196	SLC6A6	sodium:chloride symporter activity	18.8817
78	GO:MF	potassium channel regulator activity	GO:0015459	1	0	49	72	1	20196	NEDD4L	potassium channel regulator activity	5.89085
79	GO:MF	amino acid binding	GO:0016597	1	0	52	72	1	20196	SLC1A3	amino acid binding	5.5435
80	GO:MF	cholesterol binding	GO:0015485	1	0	53	72	1	20196	PROM1	cholesterol binding	5.43662
81	GO:MF	tubulin binding	GO:0015631	1	0	389	72	2	20196	MAST2,MAPT	tubulin binding	1.45714
82	GO:MF	channel regulator activity	GO:0016247	1	0	149	72	2	20196	PKP2,NEDD4L	channel regulator activity	3.8828
83	GO:MF	channel inhibitor activity	GO:0016248	1	0	40	72	1	20196	NEDD4L	channel inhibitor activity	7.25352
84	GO:MF	lysine N-methyltransferase activity	GO:0016278	1	0	62	72	1	20196	PRDM16	lysine N-methyltransferase activity	4.63242
85	GO:MF	protein-lysine N-methyltransferase activity	GO:0016279	1	0	61	72	1	20196	PRDM16	protein-lysine N-methyltransferase activity	4.70986
86	GO:MF	kinase activity	GO:0016301	1	0	780	72	8	20196	MAST2,OBSCN,TTN,RAF1,PLK2,CDKN1A,PRKCA,DMPK	kinase activity	3.13342
87	GO:MF	acetyltransferase activity	GO:0016407	1	0	96	72	1	20196	CREBBP	acetyltransferase activity	2.96946
88	GO:MF	N-acyltransferase activity	GO:0016410	1	0	93	72	1	20196	CREBBP	N-acyltransferase activity	3.06675
89	GO:MF	pyrophosphatase activity	GO:0016462	1	0	797	72	1	20196	RRAS2	pyrophosphatase activity	0.341992
90	GO:MF	protein-hormone receptor activity	GO:0016500	1	0	21	72	1	20196	GNRHR	protein-hormone receptor activity	14.1577
91	GO:MF	cyclin-dependent protein serine/threonine kinase regulator activity	GO:0016538	1	0	48	72	1	20196	CDKN1A	cyclin-dependent protein serine/threonine kinase regulator activity	6.01648
92	GO:MF	glutamate:sodium symporter activity	GO:0015501	1	0	5	72	1	20196	SLC1A3	glutamate:sodium symporter activity	70.8451
93	GO:MF	GDP binding	GO:0019003	1	0	73	72	1	20196	RRAS2	GDP binding	3.92254
94	GO:MF	kinase regulator activity	GO:0019207	1	0	270	72	1	20196	CDKN1A	kinase regulator activity	1.03958
95	GO:MF	phosphatase regulator activity	GO:0019208	1	0	108	72	1	20196	DMPK	phosphatase regulator activity	2.63486
96	GO:MF	cyclin binding	GO:0030332	1	0	34	72	1	20196	CDKN1A	cyclin binding	8.5749
97	GO:MF	nuclear receptor coactivator activity	GO:0030374	1	0	56	72	2	20196	ACTN2,NCOA6	nuclear receptor coactivator activity	10.619
98	GO:MF	ankyrin binding	GO:0030506	1	0	19	72	2	20196	OBSCN,FLNC	ankyrin binding	33.7933
99	GO:MF	Hsp70 protein binding	GO:0030544	1	0	50	72	2	20196	RNF207,DNAJC18	Hsp70 protein binding	11.95
100	GO:MF	adenyl nucleotide binding	GO:0030554	1	0	1636	72	10	20196	MAST2,OBSCN,TTN,RAF1,PLK2,UBE2D2,UBE2I,PRKCA,DMPK,UBA6	adenyl nucleotide binding	1.8349
101	GO:MF	protein-macromolecule adaptor activity	GO:0030674	1	0	988	72	10	20196	PRDM16,NOS1AP,ACTN2,LPIN1,VTI1A,AKAP13,CREBBP,MAPT,NCOA6,SMARCB1	protein-macromolecule adaptor activity	3.15753
102	GO:MF	GTPase regulator activity	GO:0030695	1	0	495	72	2	20196	OBSCN,AKAP13	GTPase regulator activity	1.1377
103	GO:MF	Tat protein binding	GO:0030957	1	0	10	72	1	20196	SMARCB1	Tat protein binding	31.4789
104	GO:MF	thiamine pyrophosphate binding	GO:0030976	1	0	8	72	1	20196	TKT	thiamine pyrophosphate binding	40.4769
105	GO:MF	filamin binding	GO:0031005	1	0	14	72	1	20196	HSPB7	filamin binding	21.7887
106	GO:MF	heat shock protein binding	GO:0031072	1	0	131	72	3	20196	RNF207,MAPT,DNAJC18	heat shock protein binding	6.79212
107	GO:MF	nuclear estrogen receptor binding	GO:0030331	1	0	41	72	2	20196	STRN,NCOA6	nuclear estrogen receptor binding	14.7143
108	GO:MF	small GTPase binding	GO:0031267	1	0	284	72	3	20196	RAF1,XPO7,AKAP13	small GTPase binding	3.07025
109	GO:MF	telethonin binding	GO:0031433	1	0	7	72	1	20196	TTN	telethonin binding	47.2254
110	GO:MF	chromatin DNA binding	GO:0031490	1	0	122	72	2	20196	CREBBP,SMARCB1	chromatin DNA binding	4.76286
111	GO:MF	nucleosome binding	GO:0031491	1	0	70	72	1	20196	SMARCB1	nucleosome binding	4.09369
112	GO:MF	nucleosomal DNA binding	GO:0031492	1	0	40	72	1	20196	SMARCB1	nucleosomal DNA binding	7.25352
113	GO:MF	ubiquitin protein ligase binding	GO:0031625	1	0	308	72	3	20196	SKI,UBE2D2,CDKN1A	ubiquitin protein ligase binding	2.82523
114	GO:MF	phosphatidylinositol-3-phosphate binding	GO:0032266	1	0	46	72	1	20196	OBSCN	phosphatidylinositol-3-phosphate binding	6.28451
115	GO:MF	ribonucleotide binding	GO:0032553	1	0	1916	72	12	20196	MAST2,OBSCN,TTN,RAF1,PLK2,UBE2D2,RRAS2,UBE2I,PRKCA,DMPK,UBA6,SRL	ribonucleotide binding	1.91387
116	GO:MF	purine ribonucleotide binding	GO:0032555	1	0	1899	72	12	20196	MAST2,OBSCN,TTN,RAF1,PLK2,UBE2D2,RRAS2,UBE2I,PRKCA,DMPK,UBA6,SRL	purine ribonucleotide binding	1.93291
117	GO:MF	adenyl ribonucleotide binding	GO:0032559	1	0	1543	72	10	20196	MAST2,OBSCN,TTN,RAF1,PLK2,UBE2D2,UBE2I,PRKCA,DMPK,UBA6	adenyl ribonucleotide binding	1.956
118	GO:MF	guanyl ribonucleotide binding	GO:0032561	1	0	410	72	2	20196	RRAS2,SRL	guanyl ribonucleotide binding	1.38067
119	GO:MF	sterol binding	GO:0032934	1	0	67	72	1	20196	PROM1	sterol binding	4.28041
120	GO:MF	carboxylic acid binding	GO:0031406	1	0	183	72	1	20196	SLC1A3	carboxylic acid binding	1.54326
121	GO:MF	protein kinase activator activity	GO:0030295	1	0	128	72	1	20196	CDKN1A	protein kinase activator activity	2.2177
122	GO:MF	protein serine/threonine kinase inhibitor activity	GO:0030291	1	0	39	72	1	20196	CDKN1A	protein serine/threonine kinase inhibitor activity	7.44477
123	GO:MF	nuclear estrogen receptor activity	GO:0030284	1	0	4	72	1	20196	PDE3A	nuclear estrogen receptor activity	94.4648
124	GO:MF	kinase activator activity	GO:0019209	1	0	136	72	1	20196	CDKN1A	kinase activator activity	2.08545
125	GO:MF	kinase inhibitor activity	GO:0019210	1	0	78	72	1	20196	CDKN1A	kinase inhibitor activity	3.66691
126	GO:MF	intermediate filament binding	GO:0019215	1	0	12	72	1	20196	PKP2	intermediate filament binding	25.7529
127	GO:MF	FAT10 activating enzyme activity	GO:0019780	1	0	1	72	1	20196	UBA6	FAT10 activating enzyme activity	566.873
128	GO:MF	ubiquitin-like protein transferase activity	GO:0019787	1	0	485	72	3	20196	UBE2D2,UBE2I,NEDD4L	ubiquitin-like protein transferase activity	1.77178
129	GO:MF	SUMO transferase activity	GO:0019789	1	0	28	72	1	20196	UBE2I	SUMO transferase activity	10.4836
130	GO:MF	vitamin binding	GO:0019842	1	0	150	72	1	20196	TKT	vitamin binding	1.88817
131	GO:MF	potassium channel inhibitor activity	GO:0019870	1	0	6	72	1	20196	NEDD4L	potassium channel inhibitor activity	56.6732
132	GO:MF	sodium channel inhibitor activity	GO:0019871	1	0	8	72	1	20196	NEDD4L	sodium channel inhibitor activity	40.4769
133	GO:MF	protein kinase regulator activity	GO:0019887	1	0	232	72	1	20196	CDKN1A	protein kinase regulator activity	1.21291
134	GO:MF	protein phosphatase regulator activity	GO:0019888	1	0	95	72	1	20196	DMPK	protein phosphatase regulator activity	3.0012
135	GO:MF	kinase binding	GO:0019900	1	0	790	72	7	20196	SKI,TTN,PDLIM5,CDKN1A,PKP2,FERMT2,MAPT	kinase binding	2.66012
136	GO:MF	protein kinase binding	GO:0019901	1	0	706	72	7	20196	SKI,TTN,PDLIM5,CDKN1A,PKP2,FERMT2,MAPT	protein kinase binding	2.99274
137	GO:MF	phosphatase binding	GO:0019902	1	0	190	72	3	20196	MAST2,STRN,MAPT	phosphatase binding	4.63543
138	GO:MF	protein phosphatase binding	GO:0019903	1	0	143	72	2	20196	STRN,MAPT	protein phosphatase binding	4.04924
139	GO:MF	protein domain specific binding	GO:0019904	1	0	655	72	8	20196	SKI,PROX1,ACTN2,STRN,MLF1,UBE2I,MAPT,SH3BGR	protein domain specific binding	3.76294
140	GO:MF	cyclin-dependent protein kinase activating kinase activity	GO:0019912	1	0	1	72	1	20196	CDKN1A	cyclin-dependent protein kinase activating kinase activity	566.873
141	GO:MF	heme binding	GO:0020037	1	0	144	72	1	20196	BACH1	heme binding	1.96799
142	GO:MF	active transmembrane transporter activity	GO:0022804	1	0	454	72	2	20196	SLC6A6,SLC1A3	active transmembrane transporter activity	1.24349
143	GO:MF	active monoatomic ion transmembrane transporter activity	GO:0022853	1	0	287	72	2	20196	SLC6A6,SLC1A3	active monoatomic ion transmembrane transporter activity	1.98887
144	GO:MF	transmembrane transporter activity	GO:0022857	1	0	1134	72	2	20196	SLC6A6,SLC1A3	transmembrane transporter activity	0.479354
145	GO:MF	alanine transmembrane transporter activity	GO:0022858	1	0	16	72	1	20196	SLC6A6	alanine transmembrane transporter activity	18.8817
146	GO:MF	inorganic cation transmembrane transporter activity	GO:0022890	1	0	613	72	2	20196	SLC6A6,SLC1A3	inorganic cation transmembrane transporter activity	0.912462
147	GO:MF	enzyme regulator activity	GO:0030234	1	0	1305	72	6	20196	SKI,OBSCN,CDKN1A,PLN,AKAP13,DMPK	enzyme regulator activity	1.31745
148	GO:MF	LIM domain binding	GO:0030274	1	0	6	72	1	20196	ACTN2	LIM domain binding	56.6732
149	GO:MF	gamma-aminobutyric acid transmembrane transporter activity	GO:0015185	1	0	9	72	1	20196	SLC6A6	gamma-aminobutyric acid transmembrane transporter activity	35.4155
150	GO:MF	estrogen response element binding	GO:0034056	1	0	11	72	1	20196	PGR	estrogen response element binding	28.3296
151	GO:MF	L-amino acid transmembrane transporter activity	GO:0015179	1	0	66	72	1	20196	SLC1A3	L-amino acid transmembrane transporter activity	4.34648
152	GO:MF	acidic amino acid transmembrane transporter activity	GO:0015172	1	0	18	72	1	20196	SLC1A3	acidic amino acid transmembrane transporter activity	16.6587
153	GO:MF	cyclic-nucleotide phosphodiesterase activity	GO:0004112	1	0	28	72	1	20196	PDE3A	cyclic-nucleotide phosphodiesterase activity	10.4836
154	GO:MF	3',5'-cyclic-nucleotide phosphodiesterase activity	GO:0004114	1	0	26	72	1	20196	PDE3A	3',5'-cyclic-nucleotide phosphodiesterase activity	11.3234
155	GO:MF	3',5'-cyclic-AMP phosphodiesterase activity	GO:0004115	1	0	18	72	1	20196	PDE3A	3',5'-cyclic-AMP phosphodiesterase activity	16.6587
156	GO:MF	3',5'-cGMP-inhibited cyclic-nucleotide phosphodiesterase activity	GO:0004119	1	0	2	72	1	20196	PDE3A	3',5'-cGMP-inhibited cyclic-nucleotide phosphodiesterase activity	283.423
157	GO:MF	endopeptidase activity	GO:0004175	1	0	394	72	1	20196	ADAMTS7	endopeptidase activity	0.707128
158	GO:MF	metalloendopeptidase activity	GO:0004222	1	0	109	72	1	20196	ADAMTS7	metalloendopeptidase activity	2.61033
159	GO:MF	histone acetyltransferase activity	GO:0004402	1	0	44	72	1	20196	CREBBP	histone acetyltransferase activity	6.57746
160	GO:MF	diacylglycerol-dependent serine/threonine kinase activity	GO:0004697	1	0	16	72	1	20196	PRKCA	diacylglycerol-dependent serine/threonine kinase activity	18.8817
161	GO:MF	calcium,diacylglycerol-dependent serine/threonine kinase activity	GO:0004698	1	0	2	72	1	20196	PRKCA	calcium,diacylglycerol-dependent serine/threonine kinase activity	283.423
162	GO:MF	MAP kinase kinase kinase activity	GO:0004709	1	0	26	72	1	20196	RAF1	MAP kinase kinase kinase activity	11.3234
163	GO:MF	protein tyrosine kinase activity	GO:0004713	1	0	148	72	1	20196	TTN	protein tyrosine kinase activity	1.91406
164	GO:MF	GTPase activity	GO:0003924	1	0	337	72	1	20196	RRAS2	GTPase activity	0.829477
165	GO:MF	thiosulfate sulfurtransferase activity	GO:0004792	1	0	4	72	1	20196	UBA6	thiosulfate sulfurtransferase activity	94.4648
166	GO:MF	ubiquitin activating enzyme activity	GO:0004839	1	0	4	72	1	20196	UBA6	ubiquitin activating enzyme activity	94.4648
167	GO:MF	ubiquitin-protein transferase activity	GO:0004842	1	0	454	72	2	20196	UBE2D2,NEDD4L	ubiquitin-protein transferase activity	1.24349
168	GO:MF	enzyme inhibitor activity	GO:0004857	1	0	393	72	3	20196	SKI,CDKN1A,PLN	enzyme inhibitor activity	2.2
169	GO:MF	protein kinase inhibitor activity	GO:0004860	1	0	73	72	1	20196	CDKN1A	protein kinase inhibitor activity	3.92254
170	GO:MF	cyclin-dependent protein serine/threonine kinase inhibitor activity	GO:0004861	1	0	12	72	1	20196	CDKN1A	cyclin-dependent protein serine/threonine kinase inhibitor activity	25.7529
171	GO:MF	nuclear receptor activity	GO:0004879	1	0	59	72	2	20196	PGR,PDE3A	nuclear receptor activity	10.0586
172	GO:MF	transmembrane signaling receptor activity	GO:0004888	1	0	1270	72	2	20196	GNRHR,PGR	transmembrane signaling receptor activity	0.424876
173	GO:MF	G protein-coupled receptor activity	GO:0004930	1	0	838	72	2	20196	GNRHR,PGR	G protein-coupled receptor activity	0.659193
174	GO:MF	gonadotropin-releasing hormone receptor activity	GO:0004968	1	0	2	72	1	20196	GNRHR	gonadotropin-releasing hormone receptor activity	283.423
175	GO:MF	nuclear export signal receptor activity	GO:0005049	1	0	12	72	1	20196	XPO7	nuclear export signal receptor activity	25.7529
176	GO:MF	MAP-kinase scaffold activity	GO:0005078	1	0	12	72	1	20196	AKAP13	MAP-kinase scaffold activity	25.7529
177	GO:MF	transketolase activity	GO:0004802	1	0	3	72	1	20196	TKT	transketolase activity	141.704
178	GO:MF	protein kinase C binding	GO:0005080	1	0	52	72	2	20196	PDLIM5,PKP2	protein kinase C binding	11.4709
179	GO:MF	ADP-ribosylarginine hydrolase activity	GO:0003875	1	0	2	72	1	20196	ADPRHL1	ADP-ribosylarginine hydrolase activity	283.423
180	GO:MF	actin monomer binding	GO:0003785	1	0	29	72	1	20196	MTSS1	actin monomer binding	10.1087
181	GO:MF	nucleotide binding	GO:0000166	1	0	2163	72	12	20196	MAST2,OBSCN,TTN,RAF1,PLK2,UBE2D2,RRAS2,UBE2I,PRKCA,DMPK,UBA6,SRL	nucleotide binding	1.67113
182	GO:MF	DNA secondary structure binding	GO:0000217	1	0	40	72	1	20196	MAPT	DNA secondary structure binding	7.25352
183	GO:MF	magnesium ion binding	GO:0000287	1	0	232	72	3	20196	MAST2,TKT,ADPRHL1	magnesium ion binding	3.77729
184	GO:MF	adenyl-nucleotide exchange factor activity	GO:0000774	1	0	15	72	1	20196	BAG3	adenyl-nucleotide exchange factor activity	20.2314
185	GO:MF	RNA polymerase II transcription regulatory region sequence-specific DNA binding	GO:0000977	1	0	1386	72	12	20196	SKI,PRDM16,NFIA,PROX1,MITF,KLF6,PGR,TBX5,NFATC3,HLF,BACH1,E2F6	RNA polymerase II transcription regulatory region sequence-specific DNA binding	2.72926
186	GO:MF	core promoter sequence-specific DNA binding	GO:0001046	1	0	42	72	1	20196	SMARCB1	core promoter sequence-specific DNA binding	6.899
187	GO:MF	RNA polymerase I transcription regulatory region sequence-specific DNA binding	GO:0001163	1	0	9	72	1	20196	SMARCB1	RNA polymerase I transcription regulatory region sequence-specific DNA binding	35.4155
188	GO:MF	RNA polymerase I core promoter sequence-specific DNA binding	GO:0001164	1	0	9	72	1	20196	SMARCB1	RNA polymerase I core promoter sequence-specific DNA binding	35.4155
189	GO:MF	transcription coregulator binding	GO:0001221	1	0	118	72	3	20196	PGR,UBE2I,CREBBP	transcription coregulator binding	7.56484
190	GO:MF	transcription coactivator binding	GO:0001223	1	0	47	72	2	20196	PGR,CREBBP	transcription coactivator binding	12.7486
191	GO:MF	protease binding	GO:0002020	1	0	144	72	1	20196	TTN	protease binding	1.96799
192	GO:MF	catalytic activity	GO:0003824	1	0	5751	72	20	20196	PRDM16,MAST2,OBSCN,LPIN1,TTN,RAF1,TKT,PLK2,UBE2D2,CDKN1A,RRAS2,PDE3A,ADPRHL1,ADAMTS7,UBE2I,CREBBP,PRKCA,NEDD4L,DMPK,UBA6	catalytic activity	0.965934
193	GO:MF	p53 binding	GO:0002039	1	0	70	72	2	20196	CREBBP,SMARCB1	p53 binding	8.42689
194	GO:MF	nucleic acid binding	GO:0003676	1	0	5470	72	21	20196	SKI,PRDM16,NFIA,PROX1,SPATS2L,MITF,MLF1,FNDC3B,KLF6,PGR,TBX5,FOXN3,UBE2I,CREBBP,NFATC3,MAPT,HLF,BACH1,SMARCB1,RPL22,E2F6	nucleic acid binding	1.10895
195	GO:MF	DNA binding	GO:0003677	1	0	2541	72	17	20196	SKI,PRDM16,NFIA,PROX1,MITF,MLF1,KLF6,PGR,TBX5,FOXN3,CREBBP,NFATC3,MAPT,HLF,BACH1,SMARCB1,E2F6	DNA binding	2.15531
196	GO:MF	minor groove of adenine-thymine-rich DNA binding	GO:0003680	1	0	11	72	1	20196	MAPT	minor groove of adenine-thymine-rich DNA binding	28.3296
197	GO:MF	chromatin binding	GO:0003682	1	0	603	72	5	20196	NFIA,MITF,CREBBP,NCOA6,SMARCB1	chromatin binding	2.43673
198	GO:MF	damaged DNA binding	GO:0003684	1	0	75	72	1	20196	CREBBP	damaged DNA binding	3.81614
199	GO:MF	single-stranded DNA binding	GO:0003697	1	0	121	72	1	20196	MAPT	single-stranded DNA binding	2.34789
200	GO:MF	nuclear steroid receptor activity	GO:0003707	1	0	26	72	2	20196	PGR,PDE3A	nuclear steroid receptor activity	23.9286
201	GO:MF	transcription coregulator activity	GO:0003712	1	0	527	72	6	20196	PRDM16,ACTN2,LPIN1,CREBBP,NCOA6,SMARCB1	transcription coregulator activity	3.42052
202	GO:MF	transcription corepressor activity	GO:0003714	1	0	200	72	1	20196	CREBBP	transcription corepressor activity	1.41022
203	GO:MF	RNA binding	GO:0003723	1	0	3093	72	5	20196	SPATS2L,FNDC3B,UBE2I,MAPT,RPL22	RNA binding	0.411704
204	GO:MF	structural constituent of ribosome	GO:0003735	1	0	449	72	1	20196	RPL22	structural constituent of ribosome	0.618587
205	GO:MF	molecular_function	GO:0003674	1	0	20196	72	72	20196	SKI,PRDM16,RNF207,HSPB7,MAST2,NFIA,NEXN,NOS1AP,PROX1,OBSCN,ACTN2,LPIN1,STRN,TMEM182,TTN,SPATS2L,RAF1,SLC6A6,TKT,MITF,MLF1,FNDC3B,PROM1,GNRHR,PDLIM5,SLC1A3,PLK2,UBE2D2,CDKN1A,MLIP,PLN,FLNC,XPO7,FBXO32,MTSS1,TMEM245,KLF6,SVIL,SYNPO2L,VTI1A,BAG3,RRAS2,PGR,PDE3A,PKP2,TBX5,HSPB8,ADPRHL1,FERMT2,FOXN3,ADAMTS7,AKAP13,UBE2I,CREBBP,NFATC3,MAPT,HLF,PRKCA,FHOD3,NEDD4L,DMPK,NCOA6,BACH1,SH3BGR,SMARCB1,RPL22,GI…	molecular_function	0
206	GO:MF	guanyl-nucleotide exchange factor activity	GO:0005085	1	0	231	72	2	20196	OBSCN,AKAP13	guanyl-nucleotide exchange factor activity	2.48222
207	GO:MF	signaling receptor binding	GO:0005102	1	0	1499	72	5	20196	ACTN2,MTSS1,PGR,FERMT2,PRKCA	signaling receptor binding	0.930588
208	GO:MF	cytokine receptor binding	GO:0005126	1	0	276	72	1	20196	FERMT2	cytokine receptor binding	1.01659
209	GO:MF	methyltransferase activity	GO:0008168	1	0	220	72	1	20196	PRDM16	methyltransferase activity	1.28015
210	GO:MF	N-methyltransferase activity	GO:0008170	1	0	99	72	1	20196	PRDM16	N-methyltransferase activity	2.87813
211	GO:MF	phosphatidate phosphatase activity	GO:0008195	1	0	14	72	1	20196	LPIN1	phosphatidate phosphatase activity	21.7887
212	GO:MF	ion channel inhibitor activity	GO:0008200	1	0	39	72	1	20196	NEDD4L	ion channel inhibitor activity	7.44477
213	GO:MF	heparin binding	GO:0008201	1	0	177	72	1	20196	RPL22	heparin binding	1.59635
214	GO:MF	peptidase activity	GO:0008233	1	0	623	72	1	20196	ADAMTS7	peptidase activity	0.441601
215	GO:MF	metallopeptidase activity	GO:0008237	1	0	187	72	1	20196	ADAMTS7	metallopeptidase activity	1.50977
216	GO:MF	zinc ion binding	GO:0008270	1	0	862	72	5	20196	SKI,RNF207,PGR,CREBBP,PRKCA	zinc ion binding	1.67775
217	GO:MF	protein methyltransferase activity	GO:0008276	1	0	96	72	1	20196	PRDM16	protein methyltransferase activity	2.96946
218	GO:MF	lipid binding	GO:0008289	1	0	848	72	8	20196	OBSCN,ACTN2,PROM1,MTSS1,SVIL,PGR,FERMT2,MAPT	lipid binding	2.86964
219	GO:MF	monoatomic cation transmembrane transporter activity	GO:0008324	1	0	654	72	2	20196	SLC6A6,SLC1A3	monoatomic cation transmembrane transporter activity	0.853287
220	GO:MF	phosphoric diester hydrolase activity	GO:0008081	1	0	90	72	1	20196	PDE3A	phosphoric diester hydrolase activity	3.1706
221	GO:MF	monoatomic anion transmembrane transporter activity	GO:0008509	1	0	138	72	1	20196	SLC6A6	monoatomic anion transmembrane transporter activity	2.0548
222	GO:MF	ubiquitin-like modifier activating enzyme activity	GO:0008641	1	0	10	72	1	20196	UBA6	ubiquitin-like modifier activating enzyme activity	31.4789
223	GO:MF	S-adenosylmethionine-dependent methyltransferase activity	GO:0008757	1	0	169	72	1	20196	PRDM16	S-adenosylmethionine-dependent methyltransferase activity	1.67304
224	GO:MF	calcium-dependent protein serine/threonine kinase activity	GO:0009931	1	0	9	72	1	20196	PRKCA	calcium-dependent protein serine/threonine kinase activity	35.4155
225	GO:MF	phosphatidylinositol-5-phosphate binding	GO:0010314	1	0	20	72	1	20196	OBSCN	phosphatidylinositol-5-phosphate binding	14.9036
226	GO:MF	histone H3 acetyltransferase activity	GO:0010484	1	0	15	72	1	20196	CREBBP	histone H3 acetyltransferase activity	20.2314
227	GO:MF	monoatomic ion transmembrane transporter activity	GO:0015075	1	0	771	72	2	20196	SLC6A6,SLC1A3	monoatomic ion transmembrane transporter activity	0.719116
228	GO:MF	sodium ion transmembrane transporter activity	GO:0015081	1	0	158	72	2	20196	SLC6A6,SLC1A3	sodium ion transmembrane transporter activity	3.65714
229	GO:MF	organic cation transmembrane transporter activity	GO:0015101	1	0	80	72	1	20196	SLC6A6	organic cation transmembrane transporter activity	3.57372
230	GO:MF	inorganic anion transmembrane transporter activity	GO:0015103	1	0	161	72	1	20196	SLC6A6	inorganic anion transmembrane transporter activity	1.75739
231	GO:MF	chloride transmembrane transporter activity	GO:0015108	1	0	117	72	1	20196	SLC6A6	chloride transmembrane transporter activity	2.42933
232	GO:MF	amino acid transmembrane transporter activity	GO:0015171	1	0	101	72	2	20196	SLC6A6,SLC1A3	amino acid transmembrane transporter activity	5.77922
233	GO:MF	organic anion transmembrane transporter activity	GO:0008514	1	0	266	72	2	20196	SLC6A6,SLC1A3	organic anion transmembrane transporter activity	2.14935
234	GO:MF	N-acetyltransferase activity	GO:0008080	1	0	69	72	1	20196	CREBBP	N-acetyltransferase activity	4.1541
235	GO:MF	enzyme activator activity	GO:0008047	1	0	593	72	1	20196	CDKN1A	enzyme activator activity	0.464694
236	GO:MF	monocarboxylic acid transmembrane transporter activity	GO:0008028	1	0	71	72	1	20196	SLC6A6	monocarboxylic acid transmembrane transporter activity	4.03501
237	GO:MF	transforming growth factor beta receptor binding	GO:0005160	1	0	26	72	1	20196	FERMT2	transforming growth factor beta receptor binding	11.3234
238	GO:MF	integrin binding	GO:0005178	1	0	158	72	3	20196	ACTN2,FERMT2,PRKCA	integrin binding	5.6014
239	GO:MF	structural molecule activity	GO:0005198	1	0	1104	72	5	20196	NEXN,OBSCN,ACTN2,TTN,RPL22	structural molecule activity	1.29188
240	GO:MF	transporter activity	GO:0005215	1	0	1234	72	2	20196	SLC6A6,SLC1A3	transporter activity	0.438126
241	GO:MF	amino acid:sodium symporter activity	GO:0005283	1	0	23	72	2	20196	SLC6A6,SLC1A3	amino acid:sodium symporter activity	27.351
242	GO:MF	L-glutamate transmembrane transporter activity	GO:0005313	1	0	14	72	1	20196	SLC1A3	L-glutamate transmembrane transporter activity	21.7887
243	GO:MF	high-affinity L-glutamate transmembrane transporter activity	GO:0005314	1	0	5	72	1	20196	SLC1A3	high-affinity L-glutamate transmembrane transporter activity	70.8451
244	GO:MF	gamma-aminobutyric acid:sodium:chloride symporter activity	GO:0005332	1	0	6	72	1	20196	SLC6A6	gamma-aminobutyric acid:sodium:chloride symporter activity	56.6732
245	GO:MF	organic acid transmembrane transporter activity	GO:0005342	1	0	186	72	2	20196	SLC6A6,SLC1A3	organic acid transmembrane transporter activity	3.09627
246	GO:MF	organic acid:sodium symporter activity	GO:0005343	1	0	35	72	2	20196	SLC6A6,SLC1A3	organic acid:sodium symporter activity	17.3948
247	GO:MF	taurine transmembrane transporter activity	GO:0005368	1	0	5	72	1	20196	SLC6A6	taurine transmembrane transporter activity	70.8451
248	GO:MF	taurine:sodium symporter activity	GO:0005369	1	0	3	72	1	20196	SLC6A6	taurine:sodium symporter activity	141.704
249	GO:MF	amino acid:monoatomic cation symporter activity	GO:0005416	1	0	29	72	2	20196	SLC6A6,SLC1A3	amino acid:monoatomic cation symporter activity	21.2667
250	GO:MF	SNAP receptor activity	GO:0005484	1	0	40	72	1	20196	VTI1A	SNAP receptor activity	7.25352
251	GO:MF	binding	GO:0005488	1	0	18366	72	70	20196	SKI,PRDM16,RNF207,HSPB7,MAST2,NFIA,NEXN,NOS1AP,PROX1,OBSCN,ACTN2,LPIN1,STRN,TMEM182,TTN,SPATS2L,RAF1,TKT,MITF,MLF1,FNDC3B,PROM1,GNRHR,PDLIM5,SLC1A3,PLK2,UBE2D2,CDKN1A,MLIP,PLN,FLNC,XPO7,FBXO32,MTSS1,KLF6,SVIL,SYNPO2L,VTI1A,BAG3,RRAS2,PGR,PDE3A,PKP2,TBX5,HSPB8,ADPRHL1,FERMT2,FOXN3,ADAMTS7,AKAP13,UBE2I,CREBBP,NFATC3,MAPT,HLF,PRKCA,FHOD3,NEDD4L,DMPK,NCOA6,BACH1,SH3BGR,SMARCB1,RPL22,GIPC2,E2F6,UBA6,S…	binding	3.49694
252	GO:MF	steroid binding	GO:0005496	1	0	108	72	2	20196	PROM1,PGR	steroid binding	5.39569
253	GO:MF	calcium ion binding	GO:0005509	1	0	726	72	3	20196	ACTN2,TTN,TKT	calcium ion binding	1.1667
254	GO:MF	calmodulin binding	GO:0005516	1	0	206	72	3	20196	OBSCN,STRN,TTN	calmodulin binding	4.26665
255	GO:MF	ATP binding	GO:0005524	1	0	1502	72	10	20196	MAST2,OBSCN,TTN,RAF1,PLK2,UBE2D2,UBE2I,PRKCA,DMPK,UBA6	ATP binding	2.01418
256	GO:MF	GTP binding	GO:0005525	1	0	389	72	2	20196	RRAS2,SRL	GTP binding	1.45714
257	GO:MF	glycosaminoglycan binding	GO:0005539	1	0	248	72	1	20196	RPL22	glycosaminoglycan binding	1.13343
258	GO:MF	phospholipid binding	GO:0005543	1	0	484	72	6	20196	OBSCN,ACTN2,MTSS1,SVIL,FERMT2,MAPT	phospholipid binding	3.7364
259	GO:MF	phosphatidylinositol-4,5-bisphosphate binding	GO:0005546	1	0	85	72	3	20196	OBSCN,ACTN2,SVIL	phosphatidylinositol-4,5-bisphosphate binding	10.6267
260	GO:MF	phosphatidylinositol-3,4,5-trisphosphate binding	GO:0005547	1	0	40	72	2	20196	OBSCN,FERMT2	phosphatidylinositol-3,4,5-trisphosphate binding	15.1023
261	GO:MF	microtubule binding	GO:0008017	1	0	278	72	2	20196	MAST2,MAPT	microtubule binding	2.05466
262	GO:MF	neutral L-amino acid transmembrane transporter activity	GO:0015175	1	0	41	72	2	20196	SLC6A6,SLC1A3	neutral L-amino acid transmembrane transporter activity	14.7143
263	GO:MF	apolipoprotein binding	GO:0034185	1	0	17	72	1	20196	MAPT	apolipoprotein binding	17.7007
264	GO:MF	peptide N-acetyltransferase activity	GO:0034212	1	0	53	72	1	20196	CREBBP	peptide N-acetyltransferase activity	5.43662
265	GO:MF	dynactin binding	GO:0034452	1	0	12	72	1	20196	MAPT	dynactin binding	25.7529
266	GO:MF	small protein activating enzyme binding	GO:0044388	1	0	5	72	1	20196	UBE2I	small protein activating enzyme binding	70.8451
267	GO:MF	ubiquitin-like protein ligase binding	GO:0044389	1	0	326	72	3	20196	SKI,UBE2D2,CDKN1A	ubiquitin-like protein ligase binding	2.66537
268	GO:MF	alpha-catenin binding	GO:0045294	1	0	11	72	1	20196	PKP2	alpha-catenin binding	28.3296
269	GO:MF	cadherin binding	GO:0045296	1	0	335	72	5	20196	OBSCN,PROM1,PDLIM5,BAG3,PKP2	cadherin binding	4.47626
270	GO:MF	dynein intermediate chain binding	GO:0045505	1	0	37	72	1	20196	BAG3	dynein intermediate chain binding	7.85915
271	GO:MF	SMAD binding	GO:0046332	1	0	78	72	2	20196	SKI,FERMT2	SMAD binding	7.53684
272	GO:MF	histone deacetylase inhibitor activity	GO:0046811	1	0	2	72	1	20196	SKI	histone deacetylase inhibitor activity	283.423
273	GO:MF	metal ion binding	GO:0046872	1	0	4375	72	21	20196	SKI,PRDM16,RNF207,MAST2,OBSCN,ACTN2,TTN,RAF1,TKT,PDLIM5,SLC1A3,CDKN1A,KLF6,PGR,PDE3A,ADPRHL1,ADAMTS7,AKAP13,CREBBP,PRKCA,DMPK	metal ion binding	1.49139
274	GO:MF	metal ion transmembrane transporter activity	GO:0046873	1	0	447	72	2	20196	SLC6A6,SLC1A3	metal ion transmembrane transporter activity	1.2635
275	GO:MF	tetrapyrrole binding	GO:0046906	1	0	154	72	1	20196	BACH1	tetrapyrrole binding	1.83844
276	GO:MF	transition metal ion binding	GO:0046914	1	0	1139	72	5	20196	SKI,RNF207,PGR,CREBBP,PRKCA	transition metal ion binding	1.2497
277	GO:MF	histone H3K27 acetyltransferase activity	GO:0044017	1	0	2	72	1	20196	CREBBP	histone H3K27 acetyltransferase activity	283.423
278	GO:MF	carboxylic acid transmembrane transporter activity	GO:0046943	1	0	185	72	2	20196	SLC6A6,SLC1A3	carboxylic acid transmembrane transporter activity	3.11335
279	GO:MF	nuclear thyroid hormone receptor binding	GO:0046966	1	0	28	72	1	20196	NCOA6	nuclear thyroid hormone receptor binding	10.4836
280	GO:MF	histone H3K9 methyltransferase activity	GO:0046974	1	0	13	72	1	20196	PRDM16	histone H3K9 methyltransferase activity	23.6056
281	GO:MF	protein dimerization activity	GO:0046983	1	0	1116	72	5	20196	TKT,MITF,PLN,HSPB8,E2F6	protein dimerization activity	1.27712
282	GO:MF	3',5'-cyclic-GMP phosphodiesterase activity	GO:0047555	1	0	16	72	1	20196	PDE3A	3',5'-cyclic-GMP phosphodiesterase activity	18.8817
283	GO:MF	DNA binding domain binding	GO:0050692	1	0	4	72	1	20196	PROX1	DNA binding domain binding	94.4648
284	GO:MF	LBD domain binding	GO:0050693	1	0	7	72	1	20196	PROX1	LBD domain binding	47.2254
285	GO:MF	quaternary ammonium group binding	GO:0050997	1	0	40	72	1	20196	TKT	quaternary ammonium group binding	7.25352
286	GO:MF	nitric-oxide synthase binding	GO:0050998	1	0	11	72	1	20196	NOS1AP	nitric-oxide synthase binding	28.3296
287	GO:MF	protein kinase A binding	GO:0051018	1	0	53	72	1	20196	AKAP13	protein kinase A binding	5.43662
288	GO:MF	GTPase binding	GO:0051020	1	0	316	72	3	20196	RAF1,XPO7,AKAP13	GTPase binding	2.75191
289	GO:MF	ATPase binding	GO:0051117	1	0	84	72	2	20196	PLN,PGR	ATPase binding	6.98328
290	GO:MF	nuclear retinoid X receptor binding	GO:0046965	1	0	17	72	1	20196	NCOA6	nuclear retinoid X receptor binding	17.7007
291	GO:MF	histone H3K18 acetyltransferase activity	GO:0043993	1	0	3	72	1	20196	CREBBP	histone H3K18 acetyltransferase activity	141.704
292	GO:MF	MRF binding	GO:0043426	1	0	5	72	1	20196	CREBBP	MRF binding	70.8451
293	GO:MF	bHLH transcription factor binding	GO:0043425	1	0	32	72	1	20196	CREBBP	bHLH transcription factor binding	9.12903
294	GO:MF	type I transforming growth factor beta receptor binding	GO:0034713	1	0	11	72	1	20196	FERMT2	type I transforming growth factor beta receptor binding	28.3296
295	GO:MF	histone deacetylase regulator activity	GO:0035033	1	0	6	72	1	20196	SKI	histone deacetylase regulator activity	56.6732
296	GO:MF	phosphatidylinositol binding	GO:0035091	1	0	278	72	5	20196	OBSCN,ACTN2,SVIL,FERMT2,MAPT	phosphatidylinositol binding	5.42644
297	GO:MF	histone kinase activity	GO:0035173	1	0	25	72	1	20196	PRKCA	histone kinase activity	11.7958
298	GO:MF	histone H3T6 kinase activity	GO:0035403	1	0	2	72	1	20196	PRKCA	histone H3T6 kinase activity	283.423
299	GO:MF	signaling adaptor activity	GO:0035591	1	0	112	72	2	20196	NOS1AP,AKAP13	signaling adaptor activity	5.19844
300	GO:MF	purine ribonucleoside triphosphate binding	GO:0035639	1	0	1852	72	12	20196	MAST2,OBSCN,TTN,RAF1,PLK2,UBE2D2,RRAS2,UBE2I,PRKCA,DMPK,UBA6,SRL	purine ribonucleoside triphosphate binding	1.98739
301	GO:MF	small molecule binding	GO:0036094	1	0	6357	72	30	20196	SKI,PRDM16,RNF207,MAST2,OBSCN,ACTN2,TTN,RAF1,TKT,PROM1,PDLIM5,SLC1A3,PLK2,UBE2D2,CDKN1A,KLF6,SVIL,RRAS2,PGR,PDE3A,ADPRHL1,FERMT2,ADAMTS7,AKAP13,UBE2I,CREBBP,PRKCA,DMPK,UBA6,SRL	small molecule binding	1.55761
302	GO:MF	signaling receptor activity	GO:0038023	1	0	1492	72	3	20196	GNRHR,PGR,PDE3A	signaling receptor activity	0.544135
303	GO:MF	ATPase inhibitor activity	GO:0042030	1	0	5	72	1	20196	PLN	ATPase inhibitor activity	70.8451
304	GO:MF	histone methyltransferase activity	GO:0042054	1	0	66	72	1	20196	PRDM16	histone methyltransferase activity	4.34648
305	GO:MF	peptide binding	GO:0042277	1	0	254	72	1	20196	GNRHR	peptide binding	1.10622
306	GO:MF	hormone binding	GO:0042562	1	0	93	72	1	20196	PDE3A	hormone binding	3.06675
307	GO:MF	lipid phosphatase activity	GO:0042577	1	0	19	72	1	20196	LPIN1	lipid phosphatase activity	15.7324
308	GO:MF	phosphoric ester hydrolase activity	GO:0042578	1	0	374	72	2	20196	LPIN1,PDE3A	phosphoric ester hydrolase activity	1.51705
309	GO:MF	identical protein binding	GO:0042802	1	0	2166	72	14	20196	SKI,ACTN2,TTN,RAF1,TKT,PLN,FLNC,MTSS1,PGR,HSPB8,MAPT,SMARCB1,RPL22,GIPC2	identical protein binding	2.01583
310	GO:MF	protein homodimerization activity	GO:0042803	1	0	727	72	3	20196	TKT,PLN,HSPB8	protein homodimerization activity	1.16503
311	GO:MF	nuclear retinoic acid receptor binding	GO:0042974	1	0	26	72	1	20196	NCOA6	nuclear retinoic acid receptor binding	11.3234
312	GO:MF	ATP-dependent protein binding	GO:0043008	1	0	6	72	1	20196	PLK2	ATP-dependent protein binding	56.6732
313	GO:MF	ion binding	GO:0043167	1	0	6153	72	29	20196	SKI,PRDM16,RNF207,MAST2,OBSCN,ACTN2,TTN,RAF1,TKT,PDLIM5,SLC1A3,PLK2,UBE2D2,CDKN1A,KLF6,SVIL,RRAS2,PGR,PDE3A,ADPRHL1,FERMT2,ADAMTS7,AKAP13,UBE2I,CREBBP,PRKCA,DMPK,UBA6,SRL	ion binding	1.54178
314	GO:MF	anion binding	GO:0043168	1	0	2445	72	17	20196	MAST2,OBSCN,ACTN2,TTN,RAF1,TKT,SLC1A3,PLK2,UBE2D2,SVIL,RRAS2,FERMT2,UBE2I,PRKCA,DMPK,UBA6,SRL	anion binding	2.25275
315	GO:MF	cation binding	GO:0043169	1	0	4474	72	21	20196	SKI,PRDM16,RNF207,MAST2,OBSCN,ACTN2,TTN,RAF1,TKT,PDLIM5,SLC1A3,CDKN1A,KLF6,PGR,PDE3A,ADPRHL1,ADAMTS7,AKAP13,CREBBP,PRKCA,DMPK	cation binding	1.44908
316	GO:MF	organic acid binding	GO:0043177	1	0	195	72	1	20196	SLC1A3	organic acid binding	1.44693
317	GO:MF	alcohol binding	GO:0043178	1	0	90	72	1	20196	PROM1	alcohol binding	3.1706
318	GO:MF	phosphatidylinositol-3,4-bisphosphate binding	GO:0043325	1	0	28	72	1	20196	OBSCN	phosphatidylinositol-3,4-bisphosphate binding	10.4836
319	GO:MF	FATZ binding	GO:0051373	1	0	5	72	1	20196	ACTN2	FATZ binding	70.8451
320	GO:MF	alpha-actinin binding	GO:0051393	1	0	28	72	2	20196	TTN,PDLIM5	alpha-actinin binding	22.0857
321	GO:MF	Hsp90 protein binding	GO:0051879	1	0	44	72	1	20196	MAPT	Hsp90 protein binding	6.57746
322	GO:MF	catalytic activity, acting on a protein	GO:0140096	1	0	2358	72	16	20196	PRDM16,MAST2,OBSCN,TTN,RAF1,PLK2,UBE2D2,CDKN1A,ADPRHL1,ADAMTS7,UBE2I,CREBBP,PRKCA,NEDD4L,DMPK,UBA6	catalytic activity, acting on a protein	2.16933
323	GO:MF	molecular carrier activity	GO:0140104	1	0	96	72	2	20196	XPO7,BAG3	molecular carrier activity	6.08815
324	GO:MF	nucleocytoplasmic carrier activity	GO:0140142	1	0	32	72	1	20196	XPO7	nucleocytoplasmic carrier activity	9.12903
325	GO:MF	monocarboxylate:sodium symporter activity	GO:0140161	1	0	15	72	1	20196	SLC6A6	monocarboxylate:sodium symporter activity	20.2314
326	GO:MF	protein sequestering activity	GO:0140311	1	0	29	72	1	20196	CDKN1A	protein sequestering activity	10.1087
327	GO:MF	molecular sequestering activity	GO:0140313	1	0	49	72	1	20196	CDKN1A	molecular sequestering activity	5.89085
328	GO:MF	protein carrier chaperone	GO:0140597	1	0	34	72	1	20196	BAG3	protein carrier chaperone	8.5749
329	GO:MF	ATP-dependent activity	GO:0140657	1	0	580	72	1	20196	UBA6	ATP-dependent activity	0.475443
330	GO:MF	molecular function activator activity	GO:0140677	1	0	1132	72	1	20196	CDKN1A	molecular function activator activity	0.236523
331	GO:MF	molecular function inhibitor activity	GO:0140678	1	0	507	72	4	20196	SKI,CDKN1A,PLN,NEDD4L	molecular function inhibitor activity	2.29459
332	GO:MF	histone H3 methyltransferase activity	GO:0140938	1	0	42	72	1	20196	PRDM16	histone H3 methyltransferase activity	6.899
333	GO:MF	microtubule lateral binding	GO:0099609	1	0	1	72	1	20196	MAPT	microtubule lateral binding	566.873
334	GO:MF	histone H3K9me2 methyltransferase activity	GO:0140947	1	0	7	72	1	20196	PRDM16	histone H3K9me2 methyltransferase activity	47.2254
335	GO:MF	histone modifying activity	GO:0140993	1	0	195	72	3	20196	PRDM16,CREBBP,PRKCA	histone modifying activity	4.51359
336	GO:MF	histone H3 kinase activity	GO:0140996	1	0	12	72	1	20196	PRKCA	histone H3 kinase activity	25.7529
337	GO:MF	transporter regulator activity	GO:0141108	1	0	150	72	2	20196	PKP2,NEDD4L	transporter regulator activity	3.85637
338	GO:MF	transporter inhibitor activity	GO:0141110	1	0	40	72	1	20196	NEDD4L	transporter inhibitor activity	7.25352
339	GO:MF	nucleoside phosphate binding	GO:1901265	1	0	2181	72	12	20196	MAST2,OBSCN,TTN,RAF1,PLK2,UBE2D2,RRAS2,UBE2I,PRKCA,DMPK,UBA6,SRL	nucleoside phosphate binding	1.6556
340	GO:MF	heterocyclic compound binding	GO:1901363	1	0	2315	72	13	20196	MAST2,OBSCN,TTN,RAF1,TKT,PLK2,UBE2D2,RRAS2,UBE2I,PRKCA,DMPK,UBA6,SRL	heterocyclic compound binding	1.70586
341	GO:MF	sulfur compound binding	GO:1901681	1	0	271	72	2	20196	TKT,RPL22	sulfur compound binding	2.10887
342	GO:MF	sulfur compound transmembrane transporter activity	GO:1901682	1	0	62	72	1	20196	SLC6A6	sulfur compound transmembrane transporter activity	4.63242
343	GO:MF	histone H3K9 monomethyltransferase activity	GO:0140948	1	0	6	72	1	20196	PRDM16	histone H3K9 monomethyltransferase activity	56.6732
344	GO:MF	estrogen binding	GO:0099130	1	0	1	72	1	20196	PDE3A	estrogen binding	566.873
345	GO:MF	ion channel regulator activity	GO:0099106	1	0	144	72	2	20196	PKP2,NEDD4L	ion channel regulator activity	4.02052
346	GO:MF	histone-dependent DNA binding	GO:0099077	1	0	1	72	1	20196	MAPT	histone-dependent DNA binding	566.873
347	GO:MF	molecular transducer activity	GO:0060089	1	0	1492	72	3	20196	GNRHR,PGR,PDE3A	molecular transducer activity	0.544135
348	GO:MF	molecular adaptor activity	GO:0060090	1	0	1175	72	11	20196	PRDM16,NOS1AP,ACTN2,LPIN1,VTI1A,PKP2,AKAP13,CREBBP,MAPT,NCOA6,SMARCB1	molecular adaptor activity	2.9373
349	GO:MF	nucleoside-triphosphatase regulator activity	GO:0060589	1	0	495	72	2	20196	OBSCN,AKAP13	nucleoside-triphosphatase regulator activity	1.1377
350	GO:MF	ATPase regulator activity	GO:0060590	1	0	48	72	2	20196	PLN,BAG3	ATPase regulator activity	12.4708
351	GO:MF	ubiquitin protein ligase activity	GO:0061630	1	0	355	72	2	20196	UBE2D2,NEDD4L	ubiquitin protein ligase activity	1.60024
352	GO:MF	ubiquitin conjugating enzyme activity	GO:0061631	1	0	33	72	1	20196	UBE2D2	ubiquitin conjugating enzyme activity	8.84331
353	GO:MF	ubiquitin-like protein conjugating enzyme activity	GO:0061650	1	0	39	72	2	20196	UBE2D2,UBE2I	ubiquitin-like protein conjugating enzyme activity	15.5112
354	GO:MF	SUMO conjugating enzyme activity	GO:0061656	1	0	1	72	1	20196	UBE2I	SUMO conjugating enzyme activity	566.873
355	GO:MF	ubiquitin-like protein ligase activity	GO:0061659	1	0	373	72	2	20196	UBE2D2,NEDD4L	ubiquitin-like protein ligase activity	1.52122
356	GO:MF	peptide-lysine-N-acetyltransferase activity	GO:0061733	1	0	48	72	1	20196	CREBBP	peptide-lysine-N-acetyltransferase activity	6.01648
357	GO:MF	armadillo repeat domain binding	GO:0070016	1	0	8	72	1	20196	STRN	armadillo repeat domain binding	40.4769
358	GO:MF	titin Z domain binding	GO:0070080	1	0	2	72	1	20196	ACTN2	titin Z domain binding	283.423
359	GO:MF	phosphatidylinositol-4-phosphate binding	GO:0070273	1	0	30	72	1	20196	OBSCN	phosphatidylinositol-4-phosphate binding	9.75959
360	GO:MF	E-box binding	GO:0070888	1	0	59	72	1	20196	MITF	E-box binding	4.87275
361	GO:MF	RING-like zinc finger domain binding	GO:0071535	1	0	3	72	1	20196	UBE2I	RING-like zinc finger domain binding	141.704
362	GO:MF	lipoprotein particle binding	GO:0071813	1	0	28	72	1	20196	MAPT	lipoprotein particle binding	10.4836
363	GO:MF	protein-lipid complex binding	GO:0071814	1	0	28	72	1	20196	MAPT	protein-lipid complex binding	10.4836
364	GO:MF	protein binding involved in heterotypic cell-cell adhesion	GO:0086080	1	0	12	72	1	20196	PKP2	protein binding involved in heterotypic cell-cell adhesion	25.7529
365	GO:MF	cell adhesive protein binding involved in bundle of His cell-Purkinje myocyte communication	GO:0086083	1	0	5	72	1	20196	PKP2	cell adhesive protein binding involved in bundle of His cell-Purkinje myocyte communication	70.8451
366	GO:MF	organic cyclic compound binding	GO:0097159	1	0	7525	72	34	20196	SKI,PRDM16,MAST2,NFIA,PROX1,OBSCN,TTN,SPATS2L,RAF1,TKT,MITF,MLF1,FNDC3B,PROM1,PLK2,UBE2D2,KLF6,RRAS2,PGR,TBX5,FOXN3,UBE2I,CREBBP,NFATC3,MAPT,HLF,PRKCA,DMPK,BACH1,SMARCB1,RPL22,E2F6,UBA6,SRL	organic cyclic compound binding	1.50891
367	GO:MF	carbohydrate derivative binding	GO:0097367	1	0	2286	72	13	20196	MAST2,OBSCN,TTN,RAF1,PLK2,UBE2D2,RRAS2,UBE2I,PRKCA,DMPK,RPL22,UBA6,SRL	carbohydrate derivative binding	1.73043
368	GO:MF	structural molecule activity conferring elasticity	GO:0097493	1	0	12	72	1	20196	TTN	structural molecule activity conferring elasticity	25.7529
369	GO:MF	cell adhesion mediator activity	GO:0098631	1	0	67	72	3	20196	NEXN,PDLIM5,PKP2	cell adhesion mediator activity	13.6277
370	GO:MF	cadherin binding involved in cell-cell adhesion	GO:0098641	1	0	18	72	1	20196	PDLIM5	cadherin binding involved in cell-cell adhesion	16.6587
371	GO:MF	molecular function regulator activity	GO:0098772	1	0	2120	72	9	20196	SKI,OBSCN,CDKN1A,PLN,BAG3,PKP2,AKAP13,NEDD4L,DMPK	molecular function regulator activity	1.21899
372	GO:MF	protein phosphatase 2A binding	GO:0051721	1	0	29	72	2	20196	STRN,MAPT	protein phosphatase 2A binding	21.2667
373	GO:BP	striated muscle cell development	GO:0055002	1.36853e-11	10.8637	164	70	13	21017	SKI,PROX1,OBSCN,ACTN2,TMEM182,TTN,PDLIM5,FLNC,SYNPO2L,TBX5,ADPRHL1,AKAP13,FHOD3	striated muscle cell development	31.4102
374	GO:BP	cell differentiation	GO:0030154	4.99928e-11	10.3011	4381	70	44	21017	SKI,PRDM16,MAST2,NFIA,NEXN,PROX1,OBSCN,ACTN2,STRN,TMEM182,TTN,RAF1,SLC6A6,MITF,MLF1,PROM1,PDLIM5,SLC1A3,CDKN1A,PLN,FLNC,MTSS1,KLF6,SYNPO2L,RRAS2,PGR,PDE3A,PKP2,TBX5,ADPRHL1,FERMT2,ADAMTS7,AKAP13,NFATC3,MAPT,HLF,PRKCA,FHOD3,NEDD4L,DMPK,NCOA6,SMARCB1,RPL22,UBA6	cell differentiation	6.48126
375	GO:BP	cellular developmental process	GO:0048869	5.04235e-11	10.2974	4382	70	44	21017	SKI,PRDM16,MAST2,NFIA,NEXN,PROX1,OBSCN,ACTN2,STRN,TMEM182,TTN,RAF1,SLC6A6,MITF,MLF1,PROM1,PDLIM5,SLC1A3,CDKN1A,PLN,FLNC,MTSS1,KLF6,SYNPO2L,RRAS2,PGR,PDE3A,PKP2,TBX5,ADPRHL1,FERMT2,ADAMTS7,AKAP13,NFATC3,MAPT,HLF,PRKCA,FHOD3,NEDD4L,DMPK,NCOA6,SMARCB1,RPL22,UBA6	cell differentiation	6.47938
376	GO:BP	muscle cell development	GO:0055001	9.94569e-11	10.0024	191	70	13	21017	SKI,PROX1,OBSCN,ACTN2,TMEM182,TTN,PDLIM5,FLNC,SYNPO2L,TBX5,ADPRHL1,AKAP13,FHOD3	striated muscle cell development	26.6112
377	GO:BP	developmental process	GO:0032502	1.47437e-10	9.83139	6478	70	52	21017	SKI,PRDM16,RNF207,HSPB7,MAST2,NFIA,NEXN,PROX1,OBSCN,ACTN2,LPIN1,STRN,TMEM182,TTN,RAF1,SLC6A6,MITF,MLF1,PROM1,PDLIM5,SLC1A3,PLK2,CDKN1A,PLN,FLNC,MTSS1,KLF6,SVIL,SYNPO2L,RRAS2,PGR,PDE3A,PKP2,TBX5,ADPRHL1,FERMT2,FOXN3,ADAMTS7,AKAP13,CREBBP,NFATC3,MAPT,HLF,PRKCA,FHOD3,NEDD4L,DMPK,NCOA6,SMARCB1,RPL22,UBA6,BRWD1	developmental process	6.5281
378	GO:BP	anatomical structure development	GO:0048856	7.74531e-10	9.11096	5924	70	49	21017	SKI,RNF207,HSPB7,NFIA,NEXN,PROX1,OBSCN,ACTN2,LPIN1,STRN,TMEM182,TTN,RAF1,MITF,MLF1,PROM1,PDLIM5,SLC1A3,PLK2,CDKN1A,PLN,FLNC,MTSS1,KLF6,SVIL,SYNPO2L,RRAS2,PGR,PDE3A,PKP2,TBX5,ADPRHL1,FERMT2,FOXN3,ADAMTS7,AKAP13,CREBBP,NFATC3,MAPT,HLF,PRKCA,FHOD3,NEDD4L,DMPK,NCOA6,SMARCB1,RPL22,UBA6,BRWD1	cell differentiation	5.98604
379	GO:BP	muscle structure development	GO:0061061	8.67433e-10	9.06176	679	70	19	21017	SKI,PROX1,OBSCN,ACTN2,TMEM182,TTN,PDLIM5,FLNC,SVIL,SYNPO2L,PKP2,TBX5,ADPRHL1,AKAP13,NFATC3,HLF,FHOD3,DMPK,SMARCB1	muscle structure development	11.4514
380	GO:BP	striated muscle cell differentiation	GO:0051146	1.33206e-09	8.87548	294	70	14	21017	SKI,PROX1,OBSCN,ACTN2,TMEM182,TTN,PDLIM5,FLNC,SYNPO2L,TBX5,ADPRHL1,AKAP13,FHOD3,DMPK	striated muscle cell development	18.4527
381	GO:BP	sarcomere organization	GO:0045214	2.78332e-09	8.55544	44	70	8	21017	PROX1,OBSCN,ACTN2,TTN,FLNC,SYNPO2L,AKAP13,FHOD3	striated muscle cell development	74.9498
382	GO:BP	myofibril assembly	GO:0030239	2.82398e-09	8.54914	70	70	9	21017	PROX1,OBSCN,ACTN2,TTN,FLNC,SYNPO2L,ADPRHL1,AKAP13,FHOD3	striated muscle cell development	50.5171
383	GO:BP	muscle cell differentiation	GO:0042692	5.16945e-09	8.28656	397	70	15	21017	SKI,PROX1,OBSCN,ACTN2,TMEM182,TTN,PDLIM5,FLNC,SYNPO2L,TBX5,ADPRHL1,AKAP13,NFATC3,FHOD3,DMPK	striated muscle cell development	14.6823
384	GO:BP	cellular component assembly involved in morphogenesis	GO:0010927	2.46803e-08	7.60765	128	70	10	21017	PROX1,OBSCN,ACTN2,TTN,PLN,FLNC,SYNPO2L,ADPRHL1,AKAP13,FHOD3	striated muscle cell development	29.4195
385	GO:BP	cellular anatomical entity morphogenesis	GO:0032989	2.46803e-08	7.60765	128	70	10	21017	PROX1,OBSCN,ACTN2,TTN,PLN,FLNC,SYNPO2L,ADPRHL1,AKAP13,FHOD3	cellular anatomical entity morphogenesis	29.4195
386	GO:BP	cell development	GO:0048468	9.48791e-08	7.02283	2833	70	32	21017	SKI,NEXN,PROX1,OBSCN,ACTN2,STRN,TMEM182,TTN,RAF1,MITF,MLF1,PDLIM5,SLC1A3,CDKN1A,PLN,FLNC,KLF6,SYNPO2L,PGR,PDE3A,TBX5,ADPRHL1,AKAP13,NFATC3,MAPT,PRKCA,FHOD3,NEDD4L,NCOA6,SMARCB1,RPL22,UBA6	cell differentiation	5.4555
387	GO:BP	multicellular organismal process	GO:0032501	9.84501e-08	7.00678	7234	70	51	21017	SKI,PRDM16,RNF207,HSPB7,MAST2,NFIA,NEXN,NOS1AP,PROX1,ACTN2,LPIN1,STRN,TTN,RAF1,SLC6A6,MITF,PROM1,GNRHR,PDLIM5,SLC1A3,PLK2,CDKN1A,MLIP,PLN,FBXO32,MTSS1,KLF6,SYNPO2L,VTI1A,RRAS2,PGR,PDE3A,SSPN,PKP2,TBX5,ADPRHL1,FERMT2,FOXN3,ADAMTS7,AKAP13,CREBBP,NFATC3,MAPT,PRKCA,FHOD3,NEDD4L,DMPK,NCOA6,SMARCB1,RPL22,UBA6	multicellular organismal process	5.14346
388	GO:BP	anatomical structure morphogenesis	GO:0009653	1.38755e-07	6.85775	2692	70	31	21017	SKI,RNF207,NFIA,NEXN,PROX1,OBSCN,ACTN2,TMEM182,TTN,PROM1,PDLIM5,SLC1A3,PLK2,PLN,FLNC,MTSS1,SYNPO2L,PGR,PKP2,TBX5,ADPRHL1,FERMT2,FOXN3,AKAP13,CREBBP,NFATC3,MAPT,PRKCA,FHOD3,NEDD4L,BRWD1	cell differentiation	5.46224
389	GO:BP	actin filament-based process	GO:0030029	1.63586e-07	6.78625	806	70	18	21017	RNF207,NOS1AP,PROX1,OBSCN,ACTN2,TTN,PDLIM5,PLN,FLNC,MTSS1,SVIL,SYNPO2L,PKP2,ADPRHL1,FERMT2,AKAP13,FHOD3,NEDD4L	actin filament-based process	8.85548
390	GO:BP	heart development	GO:0007507	1.63724e-07	6.78589	600	70	16	21017	SKI,RNF207,HSPB7,PROX1,ACTN2,TTN,PDLIM5,CDKN1A,PLN,SYNPO2L,PKP2,TBX5,ADPRHL1,AKAP13,FHOD3,NCOA6	heart development	10.3313
391	GO:BP	cardiac muscle tissue development	GO:0048738	4.28708e-07	6.36784	229	70	11	21017	SKI,PROX1,ACTN2,TTN,PDLIM5,PLN,PKP2,TBX5,ADPRHL1,AKAP13,FHOD3	striated muscle tissue development	17.7281
392	GO:BP	striated muscle tissue development	GO:0014706	1.02145e-06	5.99078	398	70	13	21017	SKI,PROX1,ACTN2,TTN,PDLIM5,PLN,SVIL,PKP2,TBX5,ADPRHL1,AKAP13,HLF,FHOD3	striated muscle tissue development	12.1807
393	GO:BP	system development	GO:0048731	1.74648e-06	5.75784	3985	70	36	21017	SKI,RNF207,HSPB7,NFIA,NEXN,PROX1,ACTN2,LPIN1,STRN,TTN,RAF1,MITF,PROM1,PDLIM5,SLC1A3,PLK2,CDKN1A,PLN,MTSS1,SYNPO2L,RRAS2,PGR,PKP2,TBX5,ADPRHL1,FOXN3,ADAMTS7,AKAP13,NFATC3,MAPT,PRKCA,FHOD3,NEDD4L,NCOA6,SMARCB1,UBA6	cell differentiation	4.55758
394	GO:BP	muscle tissue development	GO:0060537	2.02135e-06	5.69436	421	70	13	21017	SKI,PROX1,ACTN2,TTN,PDLIM5,PLN,SVIL,PKP2,TBX5,ADPRHL1,AKAP13,HLF,FHOD3	striated muscle tissue development	11.4812
395	GO:BP	actomyosin structure organization	GO:0031032	2.57232e-06	5.58968	205	70	10	21017	PROX1,OBSCN,ACTN2,TTN,FLNC,SYNPO2L,ADPRHL1,FERMT2,AKAP13,FHOD3	actomyosin structure organization	17.7368
396	GO:BP	muscle system process	GO:0003012	2.76151e-06	5.55885	432	70	13	21017	RNF207,NOS1AP,TTN,PDLIM5,MLIP,PLN,FBXO32,SSPN,PKP2,NFATC3,PRKCA,NEDD4L,DMPK	muscle system process	11.1738
397	GO:BP	animal organ development	GO:0048513	3.17304e-06	5.49852	3047	70	31	21017	SKI,RNF207,HSPB7,NFIA,PROX1,ACTN2,LPIN1,TMEM182,TTN,RAF1,MITF,PROM1,PDLIM5,CDKN1A,PLN,MTSS1,SVIL,SYNPO2L,PGR,PKP2,TBX5,ADPRHL1,FERMT2,FOXN3,ADAMTS7,AKAP13,HLF,FHOD3,NCOA6,SMARCB1,UBA6	cell differentiation	4.72574
398	GO:BP	circulatory system development	GO:0072359	5.52289e-06	5.25783	1134	70	19	21017	SKI,RNF207,HSPB7,PROX1,ACTN2,TTN,PDLIM5,PLK2,CDKN1A,PLN,SYNPO2L,PKP2,TBX5,ADPRHL1,AKAP13,NFATC3,PRKCA,FHOD3,NCOA6	circulatory system development	6.62636
399	GO:BP	multicellular organism development	GO:0007275	8.16265e-06	5.08817	4658	70	38	21017	SKI,RNF207,HSPB7,NFIA,NEXN,PROX1,ACTN2,LPIN1,STRN,TTN,RAF1,MITF,PROM1,PDLIM5,SLC1A3,PLK2,CDKN1A,PLN,MTSS1,SYNPO2L,RRAS2,PGR,PKP2,TBX5,ADPRHL1,FERMT2,FOXN3,ADAMTS7,AKAP13,CREBBP,NFATC3,MAPT,PRKCA,FHOD3,NEDD4L,NCOA6,SMARCB1,UBA6	cell differentiation	4.1966
400	GO:BP	cardiac muscle cell differentiation	GO:0055007	8.25678e-06	5.08319	116	70	8	21017	PROX1,ACTN2,TTN,PDLIM5,TBX5,ADPRHL1,AKAP13,FHOD3	striated muscle tissue development	24.8973
401	GO:BP	system process	GO:0003008	1.0304e-05	4.98699	2266	70	26	21017	RNF207,HSPB7,NOS1AP,LPIN1,TTN,SLC6A6,GNRHR,PDLIM5,SLC1A3,PLK2,MLIP,PLN,FBXO32,VTI1A,PDE3A,SSPN,PKP2,TBX5,FERMT2,AKAP13,NFATC3,MAPT,PRKCA,NEDD4L,DMPK,UBA6	system process	4.93488
402	GO:BP	circulatory system process	GO:0003013	1.35415e-05	4.86833	593	70	14	21017	RNF207,HSPB7,NOS1AP,TTN,SLC6A6,SLC1A3,PLN,PDE3A,PKP2,TBX5,FERMT2,AKAP13,NEDD4L,DMPK	circulatory system process	8.79447
403	GO:BP	cardiac muscle cell development	GO:0055013	1.38115e-05	4.85976	79	70	7	21017	PROX1,ACTN2,TTN,PDLIM5,TBX5,ADPRHL1,FHOD3	striated muscle tissue development	32.2145
404	GO:BP	heart process	GO:0003015	1.42922e-05	4.8449	245	70	10	21017	RNF207,HSPB7,NOS1AP,TTN,PLN,PKP2,TBX5,AKAP13,NEDD4L,DMPK	heart process	14.6894
405	GO:BP	cytoskeleton organization	GO:0007010	1.98973e-05	4.7012	1517	70	21	21017	MAST2,NEXN,NOS1AP,PROX1,OBSCN,ACTN2,TTN,RAF1,PDLIM5,PLK2,FLNC,MTSS1,SVIL,SYNPO2L,PKP2,ADPRHL1,FERMT2,AKAP13,MAPT,FHOD3,BRWD1	cytoskeleton organization	5.57229
406	GO:BP	cardiac cell development	GO:0055006	2.31497e-05	4.63546	85	70	7	21017	PROX1,ACTN2,TTN,PDLIM5,TBX5,ADPRHL1,FHOD3	striated muscle tissue development	29.7279
407	GO:BP	cardiocyte differentiation	GO:0035051	6.24826e-05	4.20424	150	70	8	21017	PROX1,ACTN2,TTN,PDLIM5,TBX5,ADPRHL1,AKAP13,FHOD3	heart development	18.905
408	GO:BP	heart contraction	GO:0060047	0.000140111	3.85353	234	70	9	21017	RNF207,HSPB7,NOS1AP,TTN,PLN,PKP2,TBX5,NEDD4L,DMPK	heart process	13.5882
409	GO:BP	organelle organization	GO:0006996	0.000146624	3.8338	3570	70	31	21017	MAST2,NFIA,NEXN,NOS1AP,PROX1,OBSCN,ACTN2,LPIN1,TTN,RAF1,PDLIM5,PLK2,PLN,FLNC,MTSS1,SVIL,SYNPO2L,VTI1A,BAG3,PDE3A,PKP2,ADPRHL1,FERMT2,AKAP13,UBE2I,MAPT,PRKCA,FHOD3,DMPK,SMARCB1,BRWD1	organelle organization	3.9099
410	GO:BP	membraneless organelle assembly	GO:0140694	0.000148355	3.8287	402	70	11	21017	PROX1,OBSCN,ACTN2,TTN,PLK2,FLNC,SYNPO2L,ADPRHL1,AKAP13,MAPT,FHOD3	non-membrane-bounded organelle assembly	9.80173
411	GO:BP	actin cytoskeleton organization	GO:0030036	0.00014988	3.82426	719	70	14	21017	NOS1AP,PROX1,OBSCN,ACTN2,TTN,PDLIM5,FLNC,MTSS1,SVIL,SYNPO2L,ADPRHL1,FERMT2,AKAP13,FHOD3	actomyosin structure organization	7.17801
412	GO:BP	supramolecular fiber organization	GO:0097435	0.000163979	3.78521	846	70	15	21017	PROX1,OBSCN,ACTN2,TTN,FLNC,MTSS1,SVIL,SYNPO2L,PKP2,ADPRHL1,FERMT2,ADAMTS7,AKAP13,MAPT,FHOD3	supramolecular fiber organization	6.6019
413	GO:BP	regulation of system process	GO:0044057	0.000360507	3.44309	542	70	12	21017	RNF207,HSPB7,NOS1AP,LPIN1,MLIP,PLN,FBXO32,PKP2,TBX5,NFATC3,PRKCA,DMPK	regulation of system process	7.9702
414	GO:BP	tissue development	GO:0009888	0.00054367	3.26466	2012	70	22	21017	SKI,RNF207,NFIA,PROX1,ACTN2,TTN,PROM1,PDLIM5,CDKN1A,PLN,MTSS1,SVIL,PGR,PKP2,TBX5,ADPRHL1,FERMT2,ADAMTS7,AKAP13,HLF,FHOD3,SMARCB1	cell differentiation	4.36614
415	GO:BP	cardiac myofibril assembly	GO:0055003	0.000726015	3.13905	19	70	4	21017	PROX1,TTN,ADPRHL1,FHOD3	striated muscle tissue development	84.5737
416	GO:BP	regulation of actin filament-based process	GO:0032970	0.00076617	3.11568	375	70	10	21017	PROX1,ACTN2,PLN,MTSS1,SVIL,SYNPO2L,PKP2,FERMT2,AKAP13,FHOD3	regulation of actin filament-based process	9.39817
417	GO:BP	positive regulation of transcription by RNA polymerase II	GO:0045944	0.000994557	3.00237	1261	70	17	21017	SKI,PRDM16,NFIA,PROX1,LPIN1,RAF1,MITF,MLIP,KLF6,PGR,TBX5,CREBBP,NFATC3,HLF,NCOA6,BACH1,SMARCB1	positive regulation of cellular process	5.08025
418	GO:BP	regulation of developmental process	GO:0050793	0.00101762	2.99241	2453	70	24	21017	SKI,RNF207,PROX1,LPIN1,TMEM182,RAF1,SLC6A6,MITF,PROM1,PDLIM5,PLK2,CDKN1A,PDE3A,PKP2,TBX5,FERMT2,ADAMTS7,NFATC3,MAPT,PRKCA,NEDD4L,DMPK,SMARCB1,BRWD1	regulation of developmental process	3.97759
419	GO:BP	regulation of muscle system process	GO:0090257	0.00149814	2.82445	227	70	8	21017	RNF207,MLIP,PLN,FBXO32,PKP2,NFATC3,PRKCA,DMPK	regulation of muscle system process	12.2127
420	GO:BP	blood circulation	GO:0008015	0.0015204	2.81804	508	70	11	21017	RNF207,HSPB7,NOS1AP,TTN,PLN,PDE3A,PKP2,TBX5,FERMT2,NEDD4L,DMPK	heart process	7.67145
421	GO:BP	positive regulation of cellular process	GO:0048522	0.00174561	2.75805	5886	70	39	21017	SKI,PRDM16,RNF207,NFIA,NOS1AP,PROX1,ACTN2,LPIN1,TTN,RAF1,SLC6A6,MITF,PROM1,SLC1A3,PLK2,CDKN1A,MLIP,MTSS1,KLF6,SVIL,SYNPO2L,BAG3,RRAS2,PGR,PDE3A,TBX5,HSPB8,FERMT2,AKAP13,UBE2I,CREBBP,NFATC3,MAPT,HLF,PRKCA,NEDD4L,NCOA6,BACH1,SMARCB1	positive regulation of cellular process	3.24898
422	GO:BP	anatomical structure formation involved in morphogenesis	GO:0048646	0.00214896	2.66777	1181	70	16	21017	SKI,PROX1,OBSCN,ACTN2,TMEM182,TTN,PROM1,PLK2,PLN,FLNC,SYNPO2L,TBX5,ADPRHL1,AKAP13,PRKCA,FHOD3	anatomical structure formation involved in morphogenesis	5.03119
423	GO:BP	positive regulation of biological process	GO:0048518	0.00264788	2.5771	6235	70	40	21017	SKI,PRDM16,RNF207,NFIA,NOS1AP,PROX1,ACTN2,LPIN1,TTN,RAF1,SLC6A6,MITF,PROM1,SLC1A3,PLK2,CDKN1A,MLIP,MTSS1,KLF6,SVIL,SYNPO2L,BAG3,RRAS2,PGR,PDE3A,PKP2,TBX5,HSPB8,FERMT2,AKAP13,UBE2I,CREBBP,NFATC3,MAPT,HLF,PRKCA,NEDD4L,NCOA6,BACH1,SMARCB1	positive regulation of biological process	3.17503
424	GO:BP	striated muscle contraction	GO:0006941	0.00409244	2.38802	181	70	7	21017	RNF207,NOS1AP,TTN,PLN,PKP2,NEDD4L,DMPK	striated muscle contraction	13.265
425	GO:BP	cardiac muscle cell contraction	GO:0086003	0.0067097	2.1733	71	70	5	21017	RNF207,NOS1AP,PLN,PKP2,NEDD4L	heart process	24.3368
426	GO:BP	regulation of multicellular organismal process	GO:0051239	0.00682777	2.16572	2928	70	25	21017	SKI,PRDM16,RNF207,HSPB7,MAST2,NOS1AP,PROX1,LPIN1,MITF,PROM1,PLK2,CDKN1A,MLIP,PLN,FBXO32,PDE3A,PKP2,TBX5,FERMT2,ADAMTS7,NFATC3,MAPT,PRKCA,DMPK,SMARCB1	regulation of multicellular organismal process	3.45313
427	GO:BP	ventricular cardiac muscle cell action potential	GO:0086005	0.00739984	2.13078	33	70	4	21017	RNF207,NOS1AP,PKP2,NEDD4L	heart process	43.7158
428	GO:BP	regulation of heart contraction	GO:0008016	0.00791899	2.10133	200	70	7	21017	RNF207,HSPB7,NOS1AP,PLN,PKP2,TBX5,DMPK	regulation of muscle system process	11.9482
429	GO:BP	response to endogenous stimulus	GO:0009719	0.00872035	2.05947	1478	70	17	21017	SKI,PRDM16,NFIA,ACTN2,LPIN1,RAF1,GNRHR,CDKN1A,FBXO32,PGR,PDE3A,FERMT2,ADAMTS7,CREBBP,MAPT,PRKCA,NCOA6	response to endogenous stimulus	4.27805
430	GO:BP	regulation of supramolecular fiber organization	GO:1902903	0.00903963	2.04385	386	70	9	21017	PROX1,ACTN2,MTSS1,SVIL,SYNPO2L,FERMT2,AKAP13,MAPT,FHOD3	regulation of supramolecular fiber organization	8.05018
431	GO:BP	cardiac muscle contraction	GO:0060048	0.00971077	2.01275	134	70	6	21017	RNF207,NOS1AP,TTN,PLN,PKP2,NEDD4L	heart process	15.2483
432	GO:BP	positive regulation of metabolic process	GO:0009893	0.0111391	1.95315	3648	70	28	21017	SKI,PRDM16,RNF207,NFIA,NOS1AP,PROX1,ACTN2,LPIN1,TTN,RAF1,MITF,PLK2,CDKN1A,MLIP,KLF6,BAG3,PGR,TBX5,HSPB8,FERMT2,CREBBP,NFATC3,MAPT,HLF,NEDD4L,NCOA6,BACH1,SMARCB1	positive regulation of cellular process	3.19098
433	GO:BP	cell junction organization	GO:0034330	0.0122525	1.91178	760	70	12	21017	NFIA,NOS1AP,ACTN2,STRN,PDLIM5,MTSS1,PKP2,TBX5,FERMT2,MAPT,PRKCA,DMPK	cell junction organization	5.58704
434	GO:BP	regulation of cytoskeleton organization	GO:0051493	0.0135436	1.86827	517	70	10	21017	NEXN,PROX1,ACTN2,MTSS1,SVIL,SYNPO2L,FERMT2,AKAP13,MAPT,FHOD3	regulation of supramolecular fiber organization	6.71926
435	GO:BP	cardiac muscle hypertrophy	GO:0003300	0.0145074	1.83841	83	70	5	21017	TTN,PDLIM5,MLIP,NFATC3,PRKCA	striated muscle contraction	20.5809
436	GO:BP	heart growth	GO:0060419	0.0145074	1.83841	83	70	5	21017	SKI,PROX1,PDLIM5,TBX5,ADPRHL1	heart growth	20.5809
437	GO:BP	positive regulation of DNA-templated transcription	GO:0045893	0.0148233	1.82905	1710	70	18	21017	SKI,PRDM16,NFIA,PROX1,ACTN2,LPIN1,RAF1,MITF,MLIP,KLF6,PGR,TBX5,CREBBP,NFATC3,HLF,NCOA6,BACH1,SMARCB1	positive regulation of cellular process	3.93924
438	GO:BP	positive regulation of RNA biosynthetic process	GO:1902680	0.0151864	1.81855	1713	70	18	21017	SKI,PRDM16,NFIA,PROX1,ACTN2,LPIN1,RAF1,MITF,MLIP,KLF6,PGR,TBX5,CREBBP,NFATC3,HLF,NCOA6,BACH1,SMARCB1	positive regulation of cellular process	3.93165
439	GO:BP	cellular response to endogenous stimulus	GO:0071495	0.0151973	1.81823	1215	70	15	21017	SKI,PRDM16,NFIA,ACTN2,LPIN1,RAF1,GNRHR,FBXO32,PGR,PDE3A,FERMT2,ADAMTS7,CREBBP,MAPT,PRKCA	cellular response to endogenous stimulus	4.48795
440	GO:BP	striated muscle hypertrophy	GO:0014897	0.0172675	1.76277	86	70	5	21017	TTN,PDLIM5,MLIP,NFATC3,PRKCA	striated muscle contraction	19.8158
441	GO:BP	positive regulation of voltage-gated potassium channel activity involved in ventricular cardiac muscle cell action potential repolarization	GO:1903762	0.0188538	1.7246	2	70	2	21017	RNF207,NOS1AP	positive regulation of voltage-gated potassium channel activity involved in ventricular cardiac muscle cell action potential repolarization	1232.18
442	GO:BP	positive regulation of membrane repolarization during ventricular cardiac muscle cell action potential	GO:1905026	0.0188538	1.7246	2	70	2	21017	RNF207,NOS1AP	positive regulation of voltage-gated potassium channel activity involved in ventricular cardiac muscle cell action potential repolarization	1232.18
443	GO:BP	positive regulation of membrane repolarization during cardiac muscle cell action potential	GO:1905033	0.0188538	1.7246	2	70	2	21017	RNF207,NOS1AP	positive regulation of voltage-gated potassium channel activity involved in ventricular cardiac muscle cell action potential repolarization	1232.18
444	GO:BP	regulation of biological process	GO:0050789	0.0189695	1.72194	12278	70	58	21017	SKI,PRDM16,RNF207,HSPB7,MAST2,NFIA,NEXN,NOS1AP,PROX1,OBSCN,ACTN2,LPIN1,STRN,TMEM182,TTN,RAF1,SLC6A6,TKT,MITF,MLF1,PROM1,GNRHR,PDLIM5,SLC1A3,PLK2,CDKN1A,MLIP,PLN,FBXO32,MTSS1,KLF6,SVIL,SYNPO2L,BAG3,RRAS2,PGR,PDE3A,PKP2,TBX5,HSPB8,FERMT2,FOXN3,ADAMTS7,AKAP13,UBE2I,CREBBP,NFATC3,MAPT,HLF,PRKCA,FHOD3,NEDD4L,DMPK,NCOA6,BACH1,SMARCB1,E2F6,BRWD1	regulation of biological process	3.45176
445	GO:BP	muscle hypertrophy	GO:0014896	0.0193244	1.7139	88	70	5	21017	TTN,PDLIM5,MLIP,NFATC3,PRKCA	striated muscle contraction	19.3364
446	GO:BP	regulation of cell differentiation	GO:0045595	0.020574	1.68668	1577	70	17	21017	SKI,PROX1,TMEM182,RAF1,SLC6A6,MITF,PROM1,PDE3A,PKP2,TBX5,FERMT2,ADAMTS7,NFATC3,MAPT,PRKCA,DMPK,SMARCB1	regulation of cell differentiation	3.9862
447	GO:BP	regulation of membrane potential	GO:0042391	0.0226989	1.644	433	70	9	21017	RNF207,NOS1AP,ACTN2,PLN,PKP2,TBX5,MAPT,NEDD4L,DMPK	regulation of membrane potential	7.14147
448	GO:BP	regulation of actin cytoskeleton organization	GO:0032956	0.0258523	1.5875	334	70	8	21017	PROX1,ACTN2,MTSS1,SVIL,SYNPO2L,FERMT2,AKAP13,FHOD3	regulation of supramolecular fiber organization	8.16188
449	GO:BP	muscle contraction	GO:0006936	0.0313012	1.50444	343	70	8	21017	RNF207,NOS1AP,TTN,PLN,SSPN,PKP2,NEDD4L,DMPK	striated muscle contraction	7.93914
450	GO:BP	regulation of blood circulation	GO:1903522	0.0365262	1.4374	253	70	7	21017	RNF207,HSPB7,NOS1AP,PLN,PKP2,TBX5,DMPK	regulation of muscle system process	9.35005
451	GO:BP	regulation of potassium ion transmembrane transporter activity	GO:1901016	0.0368069	1.43407	49	70	4	21017	RNF207,NOS1AP,ACTN2,NEDD4L	positive regulation of voltage-gated potassium channel activity involved in ventricular cardiac muscle cell action potential repolarization	28.1508
452	GO:BP	actin-mediated cell contraction	GO:0070252	0.0377862	1.42267	101	70	5	21017	RNF207,NOS1AP,PLN,PKP2,NEDD4L	actin-mediated cell contraction	16.7075
453	GO:BP	organelle assembly	GO:0070925	0.038053	1.41961	998	70	13	21017	PROX1,OBSCN,ACTN2,TTN,PLK2,PLN,FLNC,SYNPO2L,BAG3,ADPRHL1,AKAP13,MAPT,FHOD3	organelle assembly	4.62207
454	GO:BP	cardiac muscle cell action potential involved in contraction	GO:0086002	0.0399072	1.39895	50	70	4	21017	RNF207,NOS1AP,PKP2,NEDD4L	heart process	27.5375
455	GO:BP	positive regulation of RNA metabolic process	GO:0051254	0.0414483	1.38249	1844	70	18	21017	SKI,PRDM16,NFIA,PROX1,ACTN2,LPIN1,RAF1,MITF,MLIP,KLF6,PGR,TBX5,CREBBP,NFATC3,HLF,NCOA6,BACH1,SMARCB1	positive regulation of cellular process	3.62476
456	GO:BP	positive regulation of nucleobase-containing compound metabolic process	GO:0045935	0.0441047	1.35552	2038	70	19	21017	SKI,PRDM16,NFIA,PROX1,ACTN2,LPIN1,RAF1,MITF,CDKN1A,MLIP,KLF6,PGR,TBX5,CREBBP,NFATC3,HLF,NCOA6,BACH1,SMARCB1	positive regulation of cellular process	3.49262
457	GO:BP	positive regulation of supramolecular fiber organization	GO:1902905	0.0444716	1.35192	175	70	6	21017	PROX1,ACTN2,MTSS1,SYNPO2L,FERMT2,MAPT	positive regulation of supramolecular fiber organization	11.5263
458	GO:BP	heart morphogenesis	GO:0003007	0.0503387	1.2981	266	70	7	21017	RNF207,PROX1,TTN,SYNPO2L,PKP2,TBX5,ADPRHL1	heart development	8.87516
459	GO:BP	regulation of voltage-gated potassium channel activity involved in ventricular cardiac muscle cell action potential repolarization	GO:1903760	0.0564393	1.24842	3	70	2	21017	RNF207,NOS1AP	positive regulation of voltage-gated potassium channel activity involved in ventricular cardiac muscle cell action potential repolarization	616.059
460	GO:BP	regulation of membrane repolarization during ventricular cardiac muscle cell action potential	GO:1905024	0.0564393	1.24842	3	70	2	21017	RNF207,NOS1AP	positive regulation of voltage-gated potassium channel activity involved in ventricular cardiac muscle cell action potential repolarization	616.059
461	GO:BP	positive regulation of cytoskeleton organization	GO:0051495	0.0589428	1.22957	184	70	6	21017	PROX1,ACTN2,MTSS1,SYNPO2L,FERMT2,MAPT	positive regulation of supramolecular fiber organization	10.9387
462	GO:BP	biological regulation	GO:0065007	0.0702052	1.15363	12671	70	58	21017	SKI,PRDM16,RNF207,HSPB7,MAST2,NFIA,NEXN,NOS1AP,PROX1,OBSCN,ACTN2,LPIN1,STRN,TMEM182,TTN,RAF1,SLC6A6,TKT,MITF,MLF1,PROM1,GNRHR,PDLIM5,SLC1A3,PLK2,CDKN1A,MLIP,PLN,FBXO32,MTSS1,KLF6,SVIL,SYNPO2L,BAG3,RRAS2,PGR,PDE3A,PKP2,TBX5,HSPB8,FERMT2,FOXN3,ADAMTS7,AKAP13,UBE2I,CREBBP,NFATC3,MAPT,HLF,PRKCA,FHOD3,NEDD4L,DMPK,NCOA6,BACH1,SMARCB1,E2F6,BRWD1	biological regulation	3.19361
463	GO:BP	nuclear envelope organization	GO:0006998	0.072059	1.14231	58	70	4	21017	LPIN1,UBE2I,PRKCA,DMPK	nuclear envelope organization	23.4489
464	GO:BP	positive regulation of macromolecule metabolic process	GO:0010604	0.0734049	1.13428	3349	70	25	21017	SKI,PRDM16,RNF207,NFIA,NOS1AP,PROX1,ACTN2,LPIN1,TTN,RAF1,MITF,PLK2,CDKN1A,MLIP,KLF6,PGR,TBX5,FERMT2,CREBBP,NFATC3,HLF,NEDD4L,NCOA6,BACH1,SMARCB1	positive regulation of cellular process	2.94541
465	GO:BP	positive regulation of potassium ion transmembrane transporter activity	GO:1901018	0.0777201	1.10947	21	70	3	21017	RNF207,NOS1AP,ACTN2	positive regulation of voltage-gated potassium channel activity involved in ventricular cardiac muscle cell action potential repolarization	52.0622
466	GO:BP	intracellular signal transduction	GO:0035556	0.0846745	1.07225	2946	70	23	21017	SKI,MAST2,NOS1AP,PROX1,OBSCN,TTN,RAF1,MLF1,PLK2,CDKN1A,PLN,SYNPO2L,RRAS2,PGR,PDE3A,FERMT2,FOXN3,AKAP13,CREBBP,NFATC3,MAPT,PRKCA,DMPK	intracellular signal transduction	3.01754
467	GO:BP	cellular response to heat	GO:0034605	0.106303	0.973454	64	70	4	21017	CDKN1A,BAG3,CREBBP,MAPT	cellular response to heat	21.098
468	GO:BP	regulation of transcription by RNA polymerase II	GO:0006357	0.106782	0.971502	2572	70	21	21017	SKI,PRDM16,NFIA,PROX1,LPIN1,RAF1,MITF,MLIP,KLF6,PGR,TBX5,FOXN3,UBE2I,CREBBP,NFATC3,HLF,NCOA6,BACH1,SMARCB1,E2F6,BRWD1	regulation of transcription by RNA polymerase II	3.09055
469	GO:BP	positive regulation of aggrephagy	GO:1905337	0.112635	0.948326	4	70	2	21017	BAG3,HSPB8	positive regulation of aggrephagy	308.015
470	GO:BP	regulation of membrane repolarization during cardiac muscle cell action potential	GO:1905031	0.112635	0.948326	4	70	2	21017	RNF207,NOS1AP	positive regulation of voltage-gated potassium channel activity involved in ventricular cardiac muscle cell action potential repolarization	308.015
471	GO:BP	desmosome assembly	GO:0002159	0.112635	0.948326	4	70	2	21017	PKP2,PRKCA	desmosome assembly	308.015
472	GO:BP	adenylate cyclase-activating adrenergic receptor signaling pathway involved in heart process	GO:0086023	0.112635	0.948326	4	70	2	21017	PLN,AKAP13	adenylate cyclase-activating adrenergic receptor signaling pathway involved in heart process	308.015
473	GO:BP	regulation of aggrephagy	GO:1905335	0.112635	0.948326	4	70	2	21017	BAG3,HSPB8	regulation of aggrephagy	308.015
474	GO:BP	actin filament-based movement	GO:0030048	0.117746	0.929054	128	70	5	21017	RNF207,NOS1AP,PLN,PKP2,NEDD4L	actin filament-based movement	13.0231
475	GO:BP	regulation of cellular component organization	GO:0051128	0.126055	0.899439	2398	70	20	21017	NEXN,PROX1,ACTN2,TMEM182,RAF1,PDLIM5,PLK2,CDKN1A,MTSS1,SVIL,SYNPO2L,PDE3A,TBX5,FERMT2,AKAP13,MAPT,FHOD3,NEDD4L,DMPK,SMARCB1	regulation of cellular component organization	3.12347
476	GO:BP	positive regulation of macromolecule biosynthetic process	GO:0010557	0.128026	0.892702	2604	70	21	21017	SKI,PRDM16,RNF207,NFIA,NOS1AP,PROX1,ACTN2,LPIN1,TTN,RAF1,MITF,MLIP,KLF6,PGR,TBX5,CREBBP,NFATC3,HLF,NCOA6,BACH1,SMARCB1	positive regulation of cellular process	3.04696
477	GO:BP	cell-cell junction organization	GO:0045216	0.143673	0.842626	216	70	6	21017	STRN,MTSS1,PKP2,TBX5,FERMT2,PRKCA	cell-cell junction organization	9.25759
478	GO:BP	regulation of organelle organization	GO:0033043	0.148417	0.828515	1139	70	13	21017	NEXN,PROX1,ACTN2,PLK2,MTSS1,SVIL,SYNPO2L,PDE3A,FERMT2,AKAP13,MAPT,FHOD3,SMARCB1	regulation of supramolecular fiber organization	4.01472
479	GO:BP	regulation of cellular process	GO:0050794	0.159716	0.796653	11876	70	55	21017	SKI,PRDM16,RNF207,MAST2,NFIA,NEXN,NOS1AP,PROX1,OBSCN,ACTN2,LPIN1,STRN,TMEM182,TTN,RAF1,SLC6A6,MITF,MLF1,PROM1,GNRHR,PDLIM5,SLC1A3,PLK2,CDKN1A,MLIP,PLN,MTSS1,KLF6,SVIL,SYNPO2L,BAG3,RRAS2,PGR,PDE3A,PKP2,TBX5,HSPB8,FERMT2,FOXN3,ADAMTS7,AKAP13,UBE2I,CREBBP,NFATC3,MAPT,HLF,PRKCA,FHOD3,NEDD4L,DMPK,NCOA6,BACH1,SMARCB1,E2F6,BRWD1	regulation of cellular process	2.83072
480	GO:BP	signaling	GO:0023052	0.168389	0.773686	6471	70	37	21017	SKI,PRDM16,RNF207,MAST2,NFIA,NOS1AP,PROX1,OBSCN,ACTN2,STRN,TTN,RAF1,SLC6A6,MITF,MLF1,GNRHR,SLC1A3,PLK2,CDKN1A,PLN,MTSS1,SYNPO2L,BAG3,RRAS2,PGR,PDE3A,PKP2,TBX5,FERMT2,FOXN3,AKAP13,CREBBP,NFATC3,MAPT,PRKCA,DMPK,SMARCB1	signaling	2.52909
481	GO:BP	cardiac muscle cell action potential	GO:0086001	0.168709	0.772862	72	70	4	21017	RNF207,NOS1AP,PKP2,NEDD4L	cardiac muscle cell action potential	18.6087
482	GO:BP	cell communication	GO:0007154	0.184144	0.734843	6496	70	37	21017	SKI,PRDM16,RNF207,MAST2,NFIA,NOS1AP,PROX1,OBSCN,ACTN2,STRN,TTN,RAF1,SLC6A6,MITF,MLF1,GNRHR,SLC1A3,PLK2,CDKN1A,PLN,MTSS1,SYNPO2L,BAG3,RRAS2,PGR,PDE3A,PKP2,TBX5,FERMT2,FOXN3,AKAP13,CREBBP,NFATC3,MAPT,PRKCA,DMPK,SMARCB1	cell communication	2.51496
483	GO:BP	microspike assembly	GO:0030035	0.187321	0.727415	5	70	2	21017	ACTN2,MTSS1	microspike assembly	205.333
484	GO:BP	positive regulation of delayed rectifier potassium channel activity	GO:1902261	0.187321	0.727415	5	70	2	21017	RNF207,NOS1AP	positive regulation of voltage-gated potassium channel activity involved in ventricular cardiac muscle cell action potential repolarization	205.333
485	GO:BP	cell junction assembly	GO:0034329	0.208186	0.681549	449	70	8	21017	ACTN2,STRN,PDLIM5,PKP2,TBX5,FERMT2,MAPT,PRKCA	cell-cell junction organization	5.99985
486	GO:BP	intracellular signaling cassette	GO:0141124	0.211417	0.674861	1895	70	17	21017	SKI,NOS1AP,OBSCN,RAF1,PLK2,CDKN1A,PLN,SYNPO2L,RRAS2,PDE3A,FERMT2,AKAP13,CREBBP,NFATC3,MAPT,PRKCA,DMPK	intracellular signaling cassette	3.25691
487	GO:BP	transcription by RNA polymerase II	GO:0006366	0.214102	0.66938	2698	70	21	21017	SKI,PRDM16,NFIA,PROX1,LPIN1,RAF1,MITF,MLIP,KLF6,PGR,TBX5,FOXN3,UBE2I,CREBBP,NFATC3,HLF,NCOA6,BACH1,SMARCB1,E2F6,BRWD1	transcription by RNA polymerase II	2.92492
488	GO:BP	positive regulation of biosynthetic process	GO:0009891	0.224587	0.648615	2707	70	21	21017	SKI,PRDM16,RNF207,NFIA,NOS1AP,PROX1,ACTN2,LPIN1,TTN,RAF1,MITF,MLIP,KLF6,PGR,TBX5,CREBBP,NFATC3,HLF,NCOA6,BACH1,SMARCB1	positive regulation of cellular process	2.91368
489	GO:BP	regulation of potassium ion transmembrane transport	GO:1901379	0.230428	0.637464	78	70	4	21017	RNF207,NOS1AP,ACTN2,NEDD4L	positive regulation of voltage-gated potassium channel activity involved in ventricular cardiac muscle cell action potential repolarization	17.095
490	GO:BP	regulation of muscle adaptation	GO:0043502	0.254217	0.594796	80	70	4	21017	MLIP,FBXO32,NFATC3,PRKCA	regulation of muscle system process	16.6435
491	GO:BP	actin filament organization	GO:0007015	0.260829	0.583644	464	70	8	21017	PROX1,ACTN2,TTN,MTSS1,SVIL,SYNPO2L,FERMT2,FHOD3	actomyosin structure organization	5.79825
492	GO:BP	cell-cell signaling involved in cardiac conduction	GO:0086019	0.282331	0.549241	32	70	3	21017	RNF207,PKP2,TBX5	regulation of muscle system process	32.2975
493	GO:BP	muscle organ development	GO:0007517	0.322845	0.491006	358	70	7	21017	SKI,PROX1,TMEM182,TTN,SVIL,PKP2,HLF	striated muscle cell development	6.51978
494	GO:BP	tissue morphogenesis	GO:0048729	0.330795	0.480442	613	70	9	21017	SKI,RNF207,PROX1,TTN,MTSS1,PGR,PKP2,TBX5,FERMT2	striated muscle tissue development	4.96925
495	GO:BP	regulation of membrane repolarization	GO:0060306	0.369895	0.431921	35	70	3	21017	RNF207,NOS1AP,NEDD4L	regulation of membrane repolarization	29.2654
496	GO:BP	negative regulation of cellular process	GO:0048523	0.375837	0.425	5646	70	33	21017	SKI,PRDM16,PROX1,ACTN2,LPIN1,STRN,TMEM182,RAF1,MITF,PLK2,CDKN1A,MLIP,PLN,MTSS1,SVIL,BAG3,PGR,PDE3A,PKP2,TBX5,FERMT2,FOXN3,ADAMTS7,UBE2I,CREBBP,NFATC3,MAPT,PRKCA,FHOD3,NEDD4L,BACH1,SMARCB1,E2F6	negative regulation of cellular process	2.43653
497	GO:BP	regulation of molecular function	GO:0065009	0.385657	0.413799	1611	70	15	21017	SKI,RNF207,NOS1AP,PROX1,ACTN2,TTN,RAF1,CDKN1A,PLN,PDE3A,FERMT2,UBE2I,MAPT,NEDD4L,SMARCB1	regulation of molecular function	3.30673
498	GO:BP	organ growth	GO:0035265	0.387994	0.411175	165	70	5	21017	SKI,PROX1,PDLIM5,TBX5,ADPRHL1	heart growth	9.99375
499	GO:BP	regulation of metal ion transport	GO:0010959	0.388359	0.410766	369	70	7	21017	RNF207,NOS1AP,ACTN2,PLN,PKP2,NEDD4L,DMPK	positive regulation of voltage-gated potassium channel activity involved in ventricular cardiac muscle cell action potential repolarization	6.31829
500	GO:BP	regulation of membrane repolarization during action potential	GO:0098903	0.391679	0.407069	7	70	2	21017	RNF207,NOS1AP	positive regulation of voltage-gated potassium channel activity involved in ventricular cardiac muscle cell action potential repolarization	123.188
501	GO:BP	skeletal muscle thin filament assembly	GO:0030240	0.391679	0.407069	7	70	2	21017	PROX1,TTN	striated muscle cell development	123.188
502	GO:BP	mitotic nuclear membrane disassembly	GO:0007077	0.391679	0.407069	7	70	2	21017	LPIN1,PRKCA	mitotic nuclear membrane disassembly	123.188
503	GO:BP	adherens junction maintenance	GO:0034334	0.391679	0.407069	7	70	2	21017	MTSS1,FERMT2	adherens junction maintenance	123.188
504	GO:BP	regulation of RNA metabolic process	GO:0051252	0.39952	0.398461	3709	70	25	21017	SKI,PRDM16,NFIA,PROX1,ACTN2,LPIN1,RAF1,MITF,MLF1,MLIP,KLF6,PGR,PDE3A,TBX5,FOXN3,UBE2I,CREBBP,NFATC3,HLF,PRKCA,NCOA6,BACH1,SMARCB1,E2F6,BRWD1	regulation of transcription by RNA polymerase II	2.6033
505	GO:BP	negative regulation of developmental process	GO:0051093	0.401928	0.395851	928	70	11	21017	SKI,PROX1,TMEM182,PLK2,CDKN1A,PKP2,TBX5,FERMT2,ADAMTS7,NFATC3,MAPT	regulation of cell differentiation	4.07242
506	GO:BP	positive regulation of potassium ion transmembrane transport	GO:1901381	0.402561	0.395168	36	70	3	21017	RNF207,NOS1AP,ACTN2	positive regulation of voltage-gated potassium channel activity involved in ventricular cardiac muscle cell action potential repolarization	28.3772
507	GO:BP	tube development	GO:0035295	0.409197	0.388068	1092	70	12	21017	SKI,RNF207,NFIA,PROX1,PROM1,PLK2,CDKN1A,MTSS1,PGR,TBX5,NFATC3,PRKCA	tube development	3.80594
508	GO:BP	growth	GO:0040007	0.453019	0.343884	941	70	11	21017	SKI,PROX1,TMEM182,TKT,PDLIM5,CDKN1A,TBX5,ADPRHL1,MAPT,NEDD4L,SMARCB1	growth	4.01289
509	GO:BP	regulation of biological quality	GO:0065008	0.458442	0.338716	2847	70	21	21017	RNF207,NOS1AP,ACTN2,RAF1,GNRHR,PDLIM5,PLK2,PLN,SVIL,BAG3,PDE3A,PKP2,TBX5,FERMT2,CREBBP,MAPT,PRKCA,FHOD3,NEDD4L,DMPK,BRWD1	regulation of biological quality	2.7481
510	GO:BP	cellular response to stimulus	GO:0051716	0.471851	0.326195	7320	70	39	21017	SKI,PRDM16,MAST2,NFIA,NOS1AP,PROX1,OBSCN,ACTN2,LPIN1,STRN,TTN,RAF1,MITF,MLF1,GNRHR,SLC1A3,PLK2,CDKN1A,PLN,FBXO32,MTSS1,SYNPO2L,BAG3,RRAS2,PGR,PDE3A,HSPB8,FERMT2,FOXN3,AKAP13,CREBBP,NFATC3,MAPT,PRKCA,DMPK,NCOA6,BACH1,SMARCB1,DNAJC18	cellular response to stimulus	2.36131
511	GO:BP	cell cycle process	GO:0022402	0.471961	0.326094	1280	70	13	21017	NFIA,PROX1,LPIN1,TTN,MLF1,PLK2,CDKN1A,SVIL,PDE3A,FOXN3,UBE2I,PRKCA,SMARCB1	cell cycle process	3.54256
512	GO:BP	regulation of potassium ion transport	GO:0043266	0.473294	0.324869	94	70	4	21017	RNF207,NOS1AP,ACTN2,NEDD4L	positive regulation of voltage-gated potassium channel activity involved in ventricular cardiac muscle cell action potential repolarization	14.0451
513	GO:BP	regulation of actin filament organization	GO:0110053	0.473446	0.324729	269	70	6	21017	ACTN2,MTSS1,SVIL,SYNPO2L,FERMT2,FHOD3	regulation of supramolecular fiber organization	7.3731
514	GO:BP	cardiac conduction	GO:0061337	0.492865	0.307272	95	70	4	21017	RNF207,PLN,PKP2,TBX5	regulation of muscle system process	13.8901
515	GO:BP	regulation of striated muscle contraction	GO:0006942	0.492865	0.307272	95	70	4	21017	RNF207,PLN,PKP2,DMPK	regulation of muscle system process	13.8901
516	GO:BP	regulation of nucleobase-containing compound metabolic process	GO:0019219	0.514729	0.288421	4002	70	26	21017	SKI,PRDM16,NFIA,PROX1,ACTN2,LPIN1,RAF1,MITF,MLF1,CDKN1A,MLIP,KLF6,PGR,PDE3A,TBX5,FOXN3,UBE2I,CREBBP,NFATC3,HLF,PRKCA,NCOA6,BACH1,SMARCB1,E2F6,BRWD1	regulation of nucleobase-containing compound metabolic process	2.52221
517	GO:BP	regulation of sarcomere organization	GO:0060297	0.521114	0.283068	8	70	2	21017	PROX1,AKAP13	regulation of sarcomere organization	102.652
518	GO:BP	regulation of primary metabolic process	GO:0080090	0.531078	0.274842	5486	70	32	21017	SKI,PRDM16,NFIA,NOS1AP,PROX1,ACTN2,LPIN1,TTN,RAF1,MITF,MLF1,PLK2,CDKN1A,MLIP,KLF6,PGR,PDE3A,TBX5,FERMT2,FOXN3,UBE2I,CREBBP,NFATC3,MAPT,HLF,PRKCA,NEDD4L,NCOA6,BACH1,SMARCB1,E2F6,BRWD1	regulation of primary metabolic process	2.39214
519	GO:BP	positive regulation of molecular function	GO:0044093	0.532782	0.273451	959	70	11	21017	SKI,RNF207,NOS1AP,PROX1,ACTN2,RAF1,CDKN1A,FERMT2,UBE2I,MAPT,SMARCB1	positive regulation of molecular function	3.93315
520	GO:BP	regulation of cellular component biogenesis	GO:0044087	0.561881	0.250355	965	70	11	21017	RAF1,PDLIM5,PLK2,MTSS1,SVIL,SYNPO2L,TBX5,FERMT2,MAPT,PRKCA,FHOD3	regulation of cellular component biogenesis	3.90724
521	GO:BP	response to heat	GO:0009408	0.599529	0.22219	100	70	4	21017	CDKN1A,BAG3,CREBBP,MAPT	response to heat	13.1635
522	GO:BP	regulation of actomyosin structure organization	GO:0110020	0.622694	0.205726	101	70	4	21017	PROX1,SYNPO2L,FERMT2,AKAP13	regulation of actomyosin structure organization	13.0272
523	GO:BP	developmental growth	GO:0048589	0.629913	0.20072	669	70	9	21017	SKI,PROX1,TMEM182,PDLIM5,CDKN1A,TBX5,ADPRHL1,MAPT,NEDD4L	developmental growth	4.5351
524	GO:BP	G protein-coupled receptor signaling pathway involved in heart process	GO:0086103	0.66856	0.17486	9	70	2	21017	PLN,AKAP13	G protein-coupled receptor signaling pathway involved in heart process	87.9832
525	GO:BP	positive regulation of potassium ion transport	GO:0043268	0.684287	0.164762	43	70	3	21017	RNF207,NOS1AP,ACTN2	positive regulation of potassium ion transport	23.4034
526	GO:BP	regulation of monoatomic ion transmembrane transporter activity	GO:0032412	0.690652	0.160741	187	70	5	21017	RNF207,NOS1AP,ACTN2,PLN,NEDD4L	regulation of monoatomic ion transmembrane transporter activity	8.77642
527	GO:BP	cellular response to growth factor stimulus	GO:0071363	0.724545	0.139935	682	70	9	21017	SKI,PRDM16,NFIA,RAF1,PDE3A,FERMT2,ADAMTS7,CREBBP,MAPT	cellular response to growth factor stimulus	4.44464
528	GO:BP	muscle adaptation	GO:0043500	0.748224	0.125968	106	70	4	21017	MLIP,FBXO32,NFATC3,PRKCA	muscle adaptation	12.3856
529	GO:BP	limb development	GO:0060173	0.760781	0.118741	191	70	5	21017	SKI,NFIA,TBX5,FERMT2,CREBBP	limb development	8.58602
530	GO:BP	appendage development	GO:0048736	0.760781	0.118741	191	70	5	21017	SKI,NFIA,TBX5,FERMT2,CREBBP	appendage development	8.58602
531	GO:BP	negative regulation of biological process	GO:0048519	0.804039	0.0947231	5865	70	33	21017	SKI,PRDM16,PROX1,ACTN2,LPIN1,STRN,TMEM182,RAF1,MITF,PLK2,CDKN1A,MLIP,PLN,MTSS1,SVIL,BAG3,PGR,PDE3A,PKP2,TBX5,FERMT2,FOXN3,ADAMTS7,UBE2I,CREBBP,NFATC3,MAPT,PRKCA,FHOD3,NEDD4L,BACH1,SMARCB1,E2F6	negative regulation of biological process	2.31155
532	GO:BP	skeletal myofibril assembly	GO:0014866	0.8339	0.0788859	10	70	2	21017	PROX1,TTN	skeletal myofibril assembly	76.9816
533	GO:BP	desmosome organization	GO:0002934	0.8339	0.0788859	10	70	2	21017	PKP2,PRKCA	desmosome organization	76.9816
534	GO:BP	aggrephagy	GO:0035973	0.8339	0.0788859	10	70	2	21017	BAG3,HSPB8	aggrephagy	76.9816
535	GO:BP	nuclear membrane organization	GO:0071763	0.835711	0.077944	46	70	3	21017	LPIN1,UBE2I,PRKCA	nuclear membrane organization	21.7674
536	GO:BP	regulation of transmembrane transporter activity	GO:0022898	0.836156	0.0777126	195	70	5	21017	RNF207,NOS1AP,ACTN2,PLN,NEDD4L	regulation of transmembrane transporter activity	8.40364
537	GO:BP	regulation of DNA-templated transcription	GO:0006355	0.881594	0.0547314	3435	70	23	21017	SKI,PRDM16,NFIA,PROX1,ACTN2,LPIN1,RAF1,MITF,MLF1,MLIP,KLF6,PGR,TBX5,FOXN3,UBE2I,CREBBP,NFATC3,HLF,NCOA6,BACH1,SMARCB1,E2F6,BRWD1	regulation of DNA-templated transcription	2.51493
538	GO:BP	cellular component organization	GO:0016043	0.936419	0.0285296	8108	70	41	21017	PRDM16,MAST2,NFIA,NEXN,NOS1AP,PROX1,OBSCN,ACTN2,LPIN1,STRN,TMEM182,TTN,RAF1,MITF,PDLIM5,PLK2,CDKN1A,PLN,FLNC,MTSS1,SVIL,SYNPO2L,VTI1A,BAG3,PDE3A,PKP2,TBX5,ADPRHL1,FERMT2,ADAMTS7,AKAP13,UBE2I,CREBBP,MAPT,PRKCA,FHOD3,NEDD4L,DMPK,SMARCB1,UBA6,BRWD1	cellular component organization	2.2573
539	GO:BP	positive regulation of cation channel activity	GO:2001259	0.94768	0.0233383	48	70	3	21017	RNF207,NOS1AP,ACTN2	positive regulation of cation channel activity	20.798
540	GO:BP	regulation of RNA biosynthetic process	GO:2001141	0.955119	0.0199425	3454	70	23	21017	SKI,PRDM16,NFIA,PROX1,ACTN2,LPIN1,RAF1,MITF,MLF1,MLIP,KLF6,PGR,TBX5,FOXN3,UBE2I,CREBBP,NFATC3,HLF,NCOA6,BACH1,SMARCB1,E2F6,BRWD1	regulation of RNA biosynthetic process	2.4983
541	GO:BP	response to growth factor	GO:0070848	0.998408	0.000691777	713	70	9	21017	SKI,PRDM16,NFIA,RAF1,PDE3A,FERMT2,ADAMTS7,CREBBP,MAPT	response to growth factor	4.24243
542	GO:BP	replicative senescence	GO:0090399	1	0	16	70	1	21017	CDKN1A	replicative senescence	20.2242
543	GO:BP	stress-induced premature senescence	GO:0090400	1	0	8	70	1	21017	CDKN1A	stress-induced premature senescence	43.354
544	GO:BP	oncogene-induced cell senescence	GO:0090402	1	0	6	70	1	21017	CDKN1A	oncogene-induced cell senescence	60.7014
545	GO:BP	organophosphate biosynthetic process	GO:0090407	1	0	617	70	2	21017	LPIN1,TKT	organophosphate biosynthetic process	0.972358
546	GO:BP	acinar cell differentiation	GO:0090425	1	0	5	70	1	21017	PROX1	acinar cell differentiation	75.8804
547	GO:BP	epiboly	GO:0090504	1	0	42	70	1	21017	FERMT2	epiboly	7.38989
548	GO:BP	epiboly involved in wound healing	GO:0090505	1	0	41	70	1	21017	FERMT2	epiboly involved in wound healing	7.575
549	GO:BP	sensory organ morphogenesis	GO:0090596	1	0	290	70	3	21017	SKI,PROX1,PROM1	sensory organ morphogenesis	3.22326
550	GO:BP	dendritic spine organization	GO:0097061	1	0	80	70	1	21017	PDLIM5	dendritic spine organization	3.82829
551	GO:BP	craniofacial suture morphogenesis	GO:0097094	1	0	19	70	1	21017	FOXN3	craniofacial suture morphogenesis	16.851
552	GO:BP	neuronal stem cell population maintenance	GO:0097150	1	0	24	70	1	21017	PROX1	neuronal stem cell population maintenance	13.1846
553	GO:BP	cellular senescence	GO:0090398	1	0	102	70	2	21017	PLK2,CDKN1A	cellular senescence	6.13147
554	GO:BP	mesenchymal stem cell proliferation	GO:0097168	1	0	9	70	1	21017	FERMT2	mesenchymal stem cell proliferation	37.933
555	GO:BP	extrinsic apoptotic signaling pathway	GO:0097191	1	0	229	70	2	21017	RAF1,BAG3	extrinsic apoptotic signaling pathway	2.68463
556	GO:BP	extrinsic apoptotic signaling pathway in absence of ligand	GO:0097192	1	0	69	70	1	21017	BAG3	extrinsic apoptotic signaling pathway in absence of ligand	4.44991
557	GO:BP	intrinsic apoptotic signaling pathway	GO:0097193	1	0	315	70	1	21017	CDKN1A	intrinsic apoptotic signaling pathway	0.952322
558	GO:BP	response to gonadotropin-releasing hormone	GO:0097210	1	0	7	70	1	21017	GNRHR	response to gonadotropin-releasing hormone	50.5821
559	GO:BP	cellular response to gonadotropin-releasing hormone	GO:0097211	1	0	5	70	1	21017	GNRHR	cellular response to gonadotropin-releasing hormone	75.8804
560	GO:BP	response to alcohol	GO:0097305	1	0	262	70	1	21017	CDKN1A	response to alcohol	1.14865
561	GO:BP	dendrite extension	GO:0097484	1	0	36	70	1	21017	NEDD4L	dendrite extension	8.65921
562	GO:BP	neuron projection guidance	GO:0097485	1	0	247	70	1	21017	NEXN	neuron projection guidance	1.21957
563	GO:BP	calcium ion transmembrane import into cytosol	GO:0097553	1	0	190	70	1	21017	PLN	calcium ion transmembrane import into cytosol	1.59175
564	GO:BP	calcineurin-mediated signaling	GO:0097720	1	0	48	70	1	21017	NFATC3	calcineurin-mediated signaling	6.44465
565	GO:BP	centriole assembly	GO:0098534	1	0	48	70	1	21017	PLK2	centriole assembly	6.44465
566	GO:BP	apoptotic signaling pathway	GO:0097190	1	0	606	70	5	21017	RAF1,CDKN1A,BAG3,PDE3A,PRKCA	apoptotic signaling pathway	2.60412
567	GO:BP	defense response to other organism	GO:0098542	1	0	1228	70	2	21017	RAF1,CREBBP	defense response to other organism	0.473107
568	GO:BP	regulation of platelet aggregation	GO:0090330	1	0	28	70	1	21017	PRKCA	regulation of platelet aggregation	11.2292
569	GO:BP	positive regulation of intracellular protein transport	GO:0090316	1	0	97	70	1	21017	BAG3	positive regulation of intracellular protein transport	3.1478
570	GO:BP	tubulin deacetylation	GO:0090042	1	0	23	70	1	21017	MAPT	tubulin deacetylation	13.7846
571	GO:BP	regulation of tubulin deacetylation	GO:0090043	1	0	21	70	1	21017	MAPT	regulation of tubulin deacetylation	15.1645
572	GO:BP	regulation of cell migration involved in sprouting angiogenesis	GO:0090049	1	0	39	70	1	21017	PLK2	regulation of cell migration involved in sprouting angiogenesis	7.97445
573	GO:BP	positive regulation of cell migration involved in sprouting angiogenesis	GO:0090050	1	0	22	70	1	21017	PLK2	positive regulation of cell migration involved in sprouting angiogenesis	14.4417
574	GO:BP	regulation of anatomical structure size	GO:0090066	1	0	518	70	4	21017	ACTN2,SVIL,MAPT,FHOD3	regulation of anatomical structure size	2.40927
575	GO:BP	positive regulation of cell cycle process	GO:0090068	1	0	253	70	1	21017	SVIL	positive regulation of cell cycle process	1.19019
576	GO:BP	relaxation of muscle	GO:0090075	1	0	34	70	1	21017	PLN	relaxation of muscle	9.18489
577	GO:BP	regulation of transmembrane receptor protein serine/threonine kinase signaling pathway	GO:0090092	1	0	264	70	3	21017	SKI,PRDM16,CREBBP	regulation of transmembrane receptor protein serine/threonine kinase signaling pathway	3.54881
578	GO:BP	positive regulation of transmembrane receptor protein serine/threonine kinase signaling pathway	GO:0090100	1	0	101	70	1	21017	CREBBP	positive regulation of transmembrane receptor protein serine/threonine kinase signaling pathway	3.0213
579	GO:BP	negative regulation of transmembrane receptor protein serine/threonine kinase signaling pathway	GO:0090101	1	0	149	70	2	21017	SKI,PRDM16	negative regulation of transmembrane receptor protein serine/threonine kinase signaling pathway	4.16166
580	GO:BP	regulation of cell-substrate junction assembly	GO:0090109	1	0	63	70	1	21017	FERMT2	regulation of cell-substrate junction assembly	4.88195
581	GO:BP	regulation of superoxide metabolic process	GO:0090322	1	0	29	70	1	21017	MAPT	regulation of superoxide metabolic process	10.8276
582	GO:BP	tissue migration	GO:0090130	1	0	104	70	1	21017	PROX1	tissue migration	2.93288
583	GO:BP	regulation of mitochondrial fission	GO:0090140	1	0	30	70	1	21017	MAPT	regulation of mitochondrial fission	10.4538
584	GO:BP	organelle membrane fusion	GO:0090174	1	0	119	70	1	21017	VTI1A	organelle membrane fusion	2.55822
585	GO:BP	positive regulation of lipid kinase activity	GO:0090218	1	0	3	70	1	21017	MAPT	positive regulation of lipid kinase activity	151.775
586	GO:BP	negative regulation of mitochondrial fission	GO:0090258	1	0	4	70	1	21017	MAPT	negative regulation of mitochondrial fission	101.179
587	GO:BP	regulation of calcium ion import	GO:0090279	1	0	45	70	1	21017	PLN	regulation of calcium ion import	6.88505
588	GO:BP	negative regulation of calcium ion import	GO:0090281	1	0	15	70	1	21017	PLN	negative regulation of calcium ion import	21.6698
589	GO:BP	regulation of cellular response to growth factor stimulus	GO:0090287	1	0	320	70	3	21017	SKI,PRDM16,CREBBP	regulation of cellular response to growth factor stimulus	2.91398
590	GO:BP	negative regulation of cellular response to growth factor stimulus	GO:0090288	1	0	103	70	1	21017	SKI	negative regulation of cellular response to growth factor stimulus	2.96178
591	GO:BP	positive regulation of wound healing	GO:0090303	1	0	63	70	1	21017	FERMT2	positive regulation of wound healing	4.88195
592	GO:BP	nucleic acid metabolic process	GO:0090304	1	0	7460	70	27	21017	SKI,PRDM16,NFIA,PROX1,ACTN2,LPIN1,RAF1,MITF,MLF1,CDKN1A,MLIP,KLF6,PGR,PDE3A,TBX5,FOXN3,UBE2I,CREBBP,NFATC3,MAPT,HLF,PRKCA,NCOA6,BACH1,SMARCB1,E2F6,BRWD1	nucleic acid metabolic process	1.1416
593	GO:BP	regulation of protein deacetylation	GO:0090311	1	0	29	70	1	21017	MAPT	regulation of protein deacetylation	10.8276
594	GO:BP	epithelium migration	GO:0090132	1	0	98	70	1	21017	PROX1	epithelium migration	3.11519
595	GO:BP	cell-cell adhesion	GO:0098609	1	0	948	70	5	21017	NEXN,PDLIM5,PKP2,PRKCA,SMARCB1	cell-cell adhesion	1.63178
596	GO:BP	monoatomic cation transmembrane transport	GO:0098655	1	0	832	70	7	21017	RNF207,NOS1AP,ACTN2,SLC6A6,SLC1A3,PLN,NEDD4L	monoatomic cation transmembrane transport	2.71003
597	GO:BP	monoatomic anion transmembrane transport	GO:0098656	1	0	142	70	1	21017	SLC1A3	monoatomic anion transmembrane transport	2.13855
598	GO:BP	synaptic signaling	GO:0099536	1	0	783	70	5	21017	SLC6A6,SLC1A3,PLK2,MAPT,DMPK	synaptic signaling	1.99417
599	GO:BP	trans-synaptic signaling	GO:0099537	1	0	759	70	5	21017	SLC6A6,SLC1A3,PLK2,MAPT,DMPK	trans-synaptic signaling	2.06009
600	GO:BP	chemical synaptic transmission, postsynaptic	GO:0099565	1	0	115	70	1	21017	DMPK	chemical synaptic transmission, postsynaptic	2.64849
601	GO:BP	cardiac muscle cell membrane repolarization	GO:0099622	1	0	37	70	2	21017	RNF207,NOS1AP	cardiac muscle cell membrane repolarization	17.5731
602	GO:BP	regulation of cardiac muscle cell membrane repolarization	GO:0099623	1	0	26	70	2	21017	RNF207,NOS1AP	regulation of cardiac muscle cell membrane repolarization	25.6409
603	GO:BP	ventricular cardiac muscle cell membrane repolarization	GO:0099625	1	0	27	70	2	21017	RNF207,NOS1AP	ventricular cardiac muscle cell membrane repolarization	24.6141
604	GO:BP	mitotic nuclear membrane organization	GO:0101024	1	0	10	70	1	21017	UBE2I	mitotic nuclear membrane organization	33.7166
605	GO:BP	cellular response to environmental stimulus	GO:0104004	1	0	333	70	3	21017	CDKN1A,BAG3,CREBBP	cellular response to environmental stimulus	2.79742
606	GO:BP	neuron projection organization	GO:0106027	1	0	91	70	1	21017	PDLIM5	neuron projection organization	3.35862
607	GO:BP	regulation of adenylate cyclase-activating G protein-coupled receptor signaling pathway	GO:0106070	1	0	14	70	1	21017	PRKCA	regulation of adenylate cyclase-activating G protein-coupled receptor signaling pathway	23.3378
608	GO:BP	positive regulation of adenylate cyclase-activating G protein-coupled receptor signaling pathway	GO:0106071	1	0	5	70	1	21017	PRKCA	positive regulation of adenylate cyclase-activating G protein-coupled receptor signaling pathway	75.8804
609	GO:BP	synaptic vesicle endosomal processing	GO:0099532	1	0	9	70	1	21017	VTI1A	synaptic vesicle endosomal processing	37.933
610	GO:BP	cold-induced thermogenesis	GO:0106106	1	0	153	70	2	21017	PRDM16,LPIN1	cold-induced thermogenesis	4.05064
611	GO:BP	positive regulation of angiotensin-activated signaling pathway	GO:0110063	1	0	1	70	1	21017	PRKCA	positive regulation of angiotensin-activated signaling pathway	607.159
612	GO:BP	plasma membrane bounded cell projection assembly	GO:0120031	1	0	590	70	2	21017	ACTN2,MTSS1	plasma membrane bounded cell projection assembly	1.01836
613	GO:BP	regulation of plasma membrane bounded cell projection organization	GO:0120035	1	0	655	70	3	21017	PDLIM5,MAPT,NEDD4L	regulation of plasma membrane bounded cell projection organization	1.39376
614	GO:BP	plasma membrane bounded cell projection organization	GO:0120036	1	0	1572	70	8	21017	NEXN,ACTN2,STRN,PDLIM5,MTSS1,MAPT,NEDD4L,UBA6	plasma membrane bounded cell projection organization	1.59913
615	GO:BP	plasma membrane bounded cell projection morphogenesis	GO:0120039	1	0	670	70	4	21017	NEXN,PDLIM5,MAPT,NEDD4L	plasma membrane bounded cell projection morphogenesis	1.84557
616	GO:BP	regulation of cold-induced thermogenesis	GO:0120161	1	0	151	70	2	21017	PRDM16,LPIN1	regulation of cold-induced thermogenesis	4.10541
617	GO:BP	positive regulation of cold-induced thermogenesis	GO:0120162	1	0	101	70	2	21017	PRDM16,LPIN1	positive regulation of cold-induced thermogenesis	6.1937
618	GO:BP	tight junction assembly	GO:0120192	1	0	75	70	1	21017	STRN	tight junction assembly	4.08794
619	GO:BP	tight junction organization	GO:0120193	1	0	81	70	1	21017	STRN	tight junction organization	3.78025
620	GO:BP	L-aspartate import across plasma membrane	GO:0140009	1	0	6	70	1	21017	SLC1A3	L-aspartate import across plasma membrane	60.7014
621	GO:BP	meiotic nuclear division	GO:0140013	1	0	198	70	1	21017	PDE3A	meiotic nuclear division	1.52652
622	GO:BP	regulation of angiotensin-activated signaling pathway	GO:0110061	1	0	4	70	1	21017	PRKCA	regulation of angiotensin-activated signaling pathway	101.179
623	GO:BP	postsynaptic cytoskeleton organization	GO:0099188	1	0	20	70	1	21017	NOS1AP	postsynaptic cytoskeleton organization	15.9634
624	GO:BP	regulation of trans-synaptic signaling	GO:0099177	1	0	491	70	5	21017	SLC6A6,SLC1A3,PLK2,MAPT,DMPK	regulation of trans-synaptic signaling	3.23852
625	GO:BP	regulation of postsynapse organization	GO:0099175	1	0	104	70	1	21017	PDLIM5	regulation of postsynapse organization	2.93288
626	GO:BP	import into cell	GO:0098657	1	0	921	70	3	21017	SLC6A6,SLC1A3,NEDD4L	import into cell	0.976929
627	GO:BP	inorganic ion transmembrane transport	GO:0098660	1	0	903	70	7	21017	RNF207,NOS1AP,ACTN2,SLC6A6,SLC1A3,PLN,NEDD4L	inorganic ion transmembrane transport	2.48648
628	GO:BP	inorganic anion transmembrane transport	GO:0098661	1	0	127	70	1	21017	SLC1A3	inorganic anion transmembrane transport	2.39487
629	GO:BP	inorganic cation transmembrane transport	GO:0098662	1	0	811	70	7	21017	RNF207,NOS1AP,ACTN2,SLC6A6,SLC1A3,PLN,NEDD4L	inorganic cation transmembrane transport	2.78372
630	GO:BP	L-glutamate import across plasma membrane	GO:0098712	1	0	17	70	1	21017	SLC1A3	L-glutamate import across plasma membrane	18.9592
631	GO:BP	maintenance of cell number	GO:0098727	1	0	185	70	4	21017	SKI,PROX1,RAF1,SMARCB1	maintenance of cell number	6.95329
632	GO:BP	macromolecule deacylation	GO:0098732	1	0	56	70	1	21017	MAPT	macromolecule deacylation	5.50514
633	GO:BP	import across plasma membrane	GO:0098739	1	0	199	70	2	21017	SLC6A6,SLC1A3	import across plasma membrane	3.09794
634	GO:BP	cell-cell adhesion via plasma-membrane adhesion molecules	GO:0098742	1	0	280	70	1	21017	NEXN	cell-cell adhesion via plasma-membrane adhesion molecules	1.07361
635	GO:BP	inorganic ion homeostasis	GO:0098771	1	0	531	70	3	21017	SLC1A3,PLN,DMPK	inorganic ion homeostasis	1.7316
636	GO:BP	nuclear chromosome segregation	GO:0098813	1	0	320	70	2	21017	TTN,SMARCB1	nuclear chromosome segregation	1.90797
637	GO:BP	modulation of excitatory postsynaptic potential	GO:0098815	1	0	48	70	1	21017	DMPK	modulation of excitatory postsynaptic potential	6.44465
638	GO:BP	protein transport along microtubule	GO:0098840	1	0	15	70	1	21017	BAG3	protein transport along microtubule	21.6698
639	GO:BP	vesicle-mediated transport to the plasma membrane	GO:0098876	1	0	151	70	2	21017	ACTN2,VTI1A	vesicle-mediated transport to the plasma membrane	4.10541
640	GO:BP	regulation of action potential	GO:0098900	1	0	55	70	3	21017	RNF207,NOS1AP,PKP2	regulation of action potential	17.9923
641	GO:BP	regulation of cardiac muscle cell action potential	GO:0098901	1	0	28	70	2	21017	NOS1AP,PKP2	regulation of cardiac muscle cell action potential	23.6663
642	GO:BP	regulation of ventricular cardiac muscle cell action potential	GO:0098911	1	0	12	70	1	21017	PKP2	regulation of ventricular cardiac muscle cell action potential	27.5837
643	GO:BP	membrane repolarization during ventricular cardiac muscle cell action potential	GO:0098915	1	0	14	70	2	21017	RNF207,NOS1AP	membrane repolarization during ventricular cardiac muscle cell action potential	51.3113
644	GO:BP	anterograde trans-synaptic signaling	GO:0098916	1	0	753	70	5	21017	SLC6A6,SLC1A3,PLK2,MAPT,DMPK	anterograde trans-synaptic signaling	2.07723
645	GO:BP	axonal transport	GO:0098930	1	0	65	70	1	21017	MAPT	axonal transport	4.72894
646	GO:BP	postsynaptic actin cytoskeleton organization	GO:0098974	1	0	17	70	1	21017	NOS1AP	postsynaptic actin cytoskeleton organization	18.9592
647	GO:BP	maintenance of protein localization at cell tip	GO:0099017	1	0	1	70	1	21017	PKP2	maintenance of protein localization at cell tip	607.159
648	GO:BP	microtubule-based transport	GO:0099111	1	0	213	70	2	21017	BAG3,MAPT	microtubule-based transport	2.89044
649	GO:BP	microtubule-based protein transport	GO:0099118	1	0	15	70	1	21017	BAG3	microtubule-based protein transport	21.6698
650	GO:BP	postsynapse organization	GO:0099173	1	0	198	70	2	21017	NOS1AP,PDLIM5	postsynapse organization	3.1139
651	GO:BP	positive regulation of filamentous growth	GO:0090033	1	0	1	70	1	21017	SMARCB1	positive regulation of filamentous growth	607.159
652	GO:BP	mitotic nuclear division	GO:0140014	1	0	281	70	3	21017	NFIA,TTN,UBE2I	mitotic nuclear division	3.32906
653	GO:BP	amino acid import across plasma membrane	GO:0089718	1	0	48	70	2	21017	SLC6A6,SLC1A3	amino acid import across plasma membrane	13.3638
654	GO:BP	regulation of the force of heart contraction by cardiac conduction	GO:0086092	1	0	2	70	1	21017	PLN	regulation of the force of heart contraction by cardiac conduction	303.565
655	GO:BP	response to dexamethasone	GO:0071548	1	0	45	70	1	21017	FBXO32	response to dexamethasone	6.88505
656	GO:BP	cellular response to dexamethasone stimulus	GO:0071549	1	0	28	70	1	21017	FBXO32	cellular response to dexamethasone stimulus	11.2292
657	GO:BP	death-inducing signaling complex assembly	GO:0071550	1	0	3	70	1	21017	RAF1	death-inducing signaling complex assembly	151.775
658	GO:BP	response to transforming growth factor beta	GO:0071559	1	0	268	70	5	21017	SKI,PRDM16,PDE3A,FERMT2,CREBBP	response to transforming growth factor beta	6.04972
659	GO:BP	cellular response to transforming growth factor beta stimulus	GO:0071560	1	0	261	70	5	21017	SKI,PRDM16,PDE3A,FERMT2,CREBBP	cellular response to transforming growth factor beta stimulus	6.21725
660	GO:BP	otic vesicle development	GO:0071599	1	0	15	70	1	21017	PROX1	otic vesicle development	21.6698
661	GO:BP	otic vesicle morphogenesis	GO:0071600	1	0	10	70	1	21017	PROX1	otic vesicle morphogenesis	33.7166
662	GO:BP	organism emergence from protective structure	GO:0071684	1	0	26	70	1	21017	SMARCB1	organism emergence from protective structure	12.1287
663	GO:BP	striated muscle myosin thick filament assembly	GO:0071688	1	0	3	70	1	21017	TTN	striated muscle myosin thick filament assembly	151.775
664	GO:BP	protein localization to extracellular region	GO:0071692	1	0	377	70	2	21017	TTN,RAF1	protein localization to extracellular region	1.61349
665	GO:BP	anatomical structure maturation	GO:0071695	1	0	274	70	4	21017	CDKN1A,PGR,PDE3A,ADAMTS7	anatomical structure maturation	4.6413
666	GO:BP	cellular response to fluid shear stress	GO:0071498	1	0	20	70	1	21017	MTSS1	cellular response to fluid shear stress	15.9634
667	GO:BP	ectodermal placode development	GO:0071696	1	0	15	70	1	21017	PROX1	ectodermal placode development	21.6698
668	GO:BP	olfactory placode development	GO:0071698	1	0	3	70	1	21017	PROX1	olfactory placode development	151.775
669	GO:BP	olfactory placode morphogenesis	GO:0071699	1	0	3	70	1	21017	PROX1	olfactory placode morphogenesis	151.775
670	GO:BP	nitrogen compound transport	GO:0071705	1	0	1909	70	8	21017	TTN,RAF1,SLC6A6,SLC1A3,CDKN1A,XPO7,VTI1A,BAG3	nitrogen compound transport	1.29277
671	GO:BP	membrane assembly	GO:0071709	1	0	61	70	1	21017	UBE2I	membrane assembly	5.04517
672	GO:BP	response to BMP	GO:0071772	1	0	164	70	3	21017	SKI,NFIA,ADAMTS7	response to BMP	5.78085
673	GO:BP	cellular response to BMP stimulus	GO:0071773	1	0	164	70	3	21017	SKI,NFIA,ADAMTS7	cellular response to BMP stimulus	5.78085
674	GO:BP	potassium ion transmembrane transport	GO:0071805	1	0	213	70	5	21017	RNF207,NOS1AP,ACTN2,SLC1A3,NEDD4L	potassium ion transmembrane transport	7.66975
675	GO:BP	protein-DNA complex organization	GO:0071824	1	0	259	70	1	21017	SMARCB1	protein-DNA complex organization	1.16217
676	GO:BP	apoptotic process in bone marrow cell	GO:0071839	1	0	5	70	1	21017	PLK2	apoptotic process in bone marrow cell	75.8804
677	GO:BP	cellular component organization or biogenesis	GO:0071840	1	0	8323	70	41	21017	PRDM16,MAST2,NFIA,NEXN,NOS1AP,PROX1,OBSCN,ACTN2,LPIN1,STRN,TMEM182,TTN,RAF1,MITF,PDLIM5,PLK2,CDKN1A,PLN,FLNC,MTSS1,SVIL,SYNPO2L,VTI1A,BAG3,PDE3A,PKP2,TBX5,ADPRHL1,FERMT2,ADAMTS7,AKAP13,UBE2I,CREBBP,MAPT,PRKCA,FHOD3,NEDD4L,DMPK,SMARCB1,UBA6,BRWD1	cellular component organization or biogenesis	2.162
678	GO:BP	regulation of apoptotic process in bone marrow cell	GO:0071865	1	0	4	70	1	21017	PLK2	regulation of apoptotic process in bone marrow cell	101.179
679	GO:BP	ectodermal placode morphogenesis	GO:0071697	1	0	13	70	1	21017	PROX1	ectodermal placode morphogenesis	25.2838
680	GO:BP	negative regulation of apoptotic process in bone marrow cell	GO:0071866	1	0	4	70	1	21017	PLK2	negative regulation of apoptotic process in bone marrow cell	101.179
681	GO:BP	cellular response to external stimulus	GO:0071496	1	0	74	70	1	21017	BAG3	cellular response to external stimulus	4.14413
682	GO:BP	cellular response to light stimulus	GO:0071482	1	0	122	70	2	21017	CDKN1A,CREBBP	cellular response to light stimulus	5.10466
683	GO:BP	cellular response to misfolded protein	GO:0071218	1	0	16	70	1	21017	DNAJC18	cellular response to misfolded protein	20.2242
684	GO:BP	cellular response to molecule of bacterial origin	GO:0071219	1	0	224	70	1	21017	PRKCA	cellular response to molecule of bacterial origin	1.34685
685	GO:BP	cellular response to lipopolysaccharide	GO:0071222	1	0	214	70	1	21017	PRKCA	cellular response to lipopolysaccharide	1.41076
686	GO:BP	cellular response to mechanical stimulus	GO:0071260	1	0	73	70	1	21017	BAG3	cellular response to mechanical stimulus	4.20189
687	GO:BP	cellular response to alkaloid	GO:0071312	1	0	38	70	1	21017	SLC1A3	cellular response to alkaloid	8.19036
688	GO:BP	cellular response to cocaine	GO:0071314	1	0	10	70	1	21017	SLC1A3	cellular response to cocaine	33.7166
689	GO:BP	cellular response to cGMP	GO:0071321	1	0	7	70	1	21017	PDE3A	cellular response to cGMP	50.5821
690	GO:BP	cellular response to carbohydrate stimulus	GO:0071322	1	0	164	70	2	21017	RAF1,SMARCB1	cellular response to carbohydrate stimulus	3.7736
691	GO:BP	cellular response to monosaccharide stimulus	GO:0071326	1	0	153	70	2	21017	RAF1,SMARCB1	cellular response to monosaccharide stimulus	4.05064
692	GO:BP	cellular response to hexose stimulus	GO:0071331	1	0	151	70	2	21017	RAF1,SMARCB1	cellular response to hexose stimulus	4.10541
693	GO:BP	cellular response to glucose stimulus	GO:0071333	1	0	148	70	2	21017	RAF1,SMARCB1	cellular response to glucose stimulus	4.19037
694	GO:BP	cellular response to UV-B	GO:0071493	1	0	12	70	1	21017	CDKN1A	cellular response to UV-B	27.5837
695	GO:BP	cellular response to cytokine stimulus	GO:0071345	1	0	843	70	2	21017	RAF1,ADAMTS7	cellular response to cytokine stimulus	0.703155
696	GO:BP	cellular response to interleukin-1	GO:0071347	1	0	106	70	1	21017	ADAMTS7	cellular response to interleukin-1	2.87674
697	GO:BP	cellular response to tumor necrosis factor	GO:0071356	1	0	229	70	1	21017	ADAMTS7	cellular response to tumor necrosis factor	1.317
698	GO:BP	cellular response to peptide hormone stimulus	GO:0071375	1	0	307	70	5	21017	ACTN2,LPIN1,RAF1,GNRHR,PRKCA	cellular response to peptide hormone stimulus	5.25853
699	GO:BP	cellular response to steroid hormone stimulus	GO:0071383	1	0	215	70	3	21017	FBXO32,PGR,PDE3A	cellular response to steroid hormone stimulus	4.3794
700	GO:BP	cellular response to corticosteroid stimulus	GO:0071384	1	0	65	70	1	21017	FBXO32	cellular response to corticosteroid stimulus	4.72894
701	GO:BP	cellular response to glucocorticoid stimulus	GO:0071385	1	0	55	70	1	21017	FBXO32	cellular response to glucocorticoid stimulus	5.60735
702	GO:BP	cellular response to lipid	GO:0071396	1	0	609	70	4	21017	FBXO32,PGR,PDE3A,PRKCA	cellular response to lipid	2.03777
703	GO:BP	cellular response to organic cyclic compound	GO:0071407	1	0	536	70	4	21017	SLC1A3,FBXO32,PGR,PDE3A	cellular response to organic cyclic compound	2.3257
704	GO:BP	cellular response to radiation	GO:0071478	1	0	180	70	2	21017	CDKN1A,CREBBP	cellular response to radiation	3.43176
705	GO:BP	cellular response to ionizing radiation	GO:0071479	1	0	70	70	1	21017	CDKN1A	cellular response to ionizing radiation	4.38521
706	GO:BP	cellular response to gamma radiation	GO:0071480	1	0	26	70	1	21017	CDKN1A	cellular response to gamma radiation	12.1287
707	GO:BP	cellular response to type II interferon	GO:0071346	1	0	125	70	1	21017	RAF1	cellular response to type II interferon	2.43373
708	GO:BP	adrenergic receptor signaling pathway	GO:0071875	1	0	33	70	2	21017	PLN,AKAP13	adrenergic receptor signaling pathway	19.8444
709	GO:BP	adenylate cyclase-activating adrenergic receptor signaling pathway	GO:0071880	1	0	25	70	2	21017	PLN,AKAP13	adenylate cyclase-activating adrenergic receptor signaling pathway	26.757
710	GO:BP	DNA biosynthetic process	GO:0071897	1	0	182	70	1	21017	CDKN1A	DNA biosynthetic process	1.66274
711	GO:BP	hepatocyte proliferation	GO:0072574	1	0	24	70	1	21017	PROX1	hepatocyte proliferation	13.1846
712	GO:BP	epithelial cell proliferation involved in liver morphogenesis	GO:0072575	1	0	24	70	1	21017	PROX1	epithelial cell proliferation involved in liver morphogenesis	13.1846
713	GO:BP	liver morphogenesis	GO:0072576	1	0	26	70	1	21017	PROX1	liver morphogenesis	12.1287
714	GO:BP	caveolin-mediated endocytosis	GO:0072584	1	0	11	70	1	21017	NEDD4L	caveolin-mediated endocytosis	30.3435
715	GO:BP	reactive oxygen species metabolic process	GO:0072593	1	0	232	70	2	21017	CDKN1A,MAPT	reactive oxygen species metabolic process	2.64923
716	GO:BP	establishment of protein localization to organelle	GO:0072594	1	0	666	70	3	21017	CDKN1A,BAG3,MAPT	establishment of protein localization to organelle	1.36989
717	GO:BP	establishment of protein localization to mitochondrion	GO:0072655	1	0	120	70	1	21017	MAPT	establishment of protein localization to mitochondrion	2.5366
718	GO:BP	protein localization to membrane	GO:0072657	1	0	825	70	3	21017	ACTN2,PKP2,FERMT2	protein localization to membrane	1.09625
719	GO:BP	protein localization to plasma membrane	GO:0072659	1	0	294	70	2	21017	ACTN2,PKP2	protein localization to plasma membrane	2.08048
720	GO:BP	regulation of response to stress	GO:0080134	1	0	1354	70	6	21017	PLK2,MLIP,FERMT2,CREBBP,MAPT,SMARCB1	regulation of response to stress	1.36306
721	GO:BP	regulation of cellular response to stress	GO:0080135	1	0	512	70	3	21017	CREBBP,MAPT,SMARCB1	regulation of cellular response to stress	1.79791
722	GO:BP	pyridine-containing compound metabolic process	GO:0072524	1	0	173	70	1	21017	TKT	pyridine-containing compound metabolic process	1.75051
723	GO:BP	regulation of nitric oxide metabolic process	GO:0080164	1	0	60	70	2	21017	NOS1AP,NFATC3	regulation of nitric oxide metabolic process	10.5928
724	GO:BP	membrane repolarization	GO:0086009	1	0	51	70	3	21017	RNF207,NOS1AP,NEDD4L	membrane repolarization	19.4953
725	GO:BP	membrane repolarization during action potential	GO:0086011	1	0	28	70	2	21017	RNF207,NOS1AP	membrane repolarization during action potential	23.6663
726	GO:BP	membrane repolarization during cardiac muscle cell action potential	GO:0086013	1	0	22	70	2	21017	RNF207,NOS1AP	membrane repolarization during cardiac muscle cell action potential	30.775
727	GO:BP	regulation of cardiac muscle cell membrane potential	GO:0086036	1	0	7	70	1	21017	PLN	regulation of cardiac muscle cell membrane potential	50.5821
728	GO:BP	cardiac muscle cell-cardiac muscle cell adhesion	GO:0086042	1	0	7	70	1	21017	PKP2	cardiac muscle cell-cardiac muscle cell adhesion	50.5821
729	GO:BP	bundle of His cell to Purkinje myocyte communication by electrical coupling	GO:0086054	1	0	2	70	1	21017	TBX5	bundle of His cell to Purkinje myocyte communication by electrical coupling	303.565
730	GO:BP	cell communication by electrical coupling involved in cardiac conduction	GO:0086064	1	0	26	70	2	21017	PKP2,TBX5	cell communication by electrical coupling involved in cardiac conduction	25.6409
731	GO:BP	cell communication involved in cardiac conduction	GO:0086065	1	0	57	70	3	21017	RNF207,PKP2,TBX5	cell communication involved in cardiac conduction	17.3242
732	GO:BP	bundle of His cell to Purkinje myocyte communication	GO:0086069	1	0	15	70	2	21017	PKP2,TBX5	bundle of His cell to Purkinje myocyte communication	47.362
733	GO:BP	bundle of His cell-Purkinje myocyte adhesion involved in cell communication	GO:0086073	1	0	6	70	1	21017	PKP2	bundle of His cell-Purkinje myocyte adhesion involved in cell communication	60.7014
734	GO:BP	regulation of heart rate by cardiac conduction	GO:0086091	1	0	40	70	1	21017	PKP2	regulation of heart rate by cardiac conduction	7.7696
735	GO:BP	regulation of cardiac muscle cell contraction	GO:0086004	1	0	33	70	2	21017	PLN,PKP2	regulation of cardiac muscle cell contraction	19.8444
736	GO:BP	purine-containing compound metabolic process	GO:0072521	1	0	567	70	1	21017	TKT	purine-containing compound metabolic process	0.521867
737	GO:BP	positive regulation of secondary heart field cardioblast proliferation	GO:0072513	1	0	4	70	1	21017	TBX5	positive regulation of secondary heart field cardioblast proliferation	101.179
738	GO:BP	plus-end-directed organelle transport along microtubule	GO:0072386	1	0	7	70	1	21017	MAPT	plus-end-directed organelle transport along microtubule	50.5821
739	GO:BP	regulation of protein serine/threonine kinase activity	GO:0071900	1	0	260	70	3	21017	PROX1,CDKN1A,FERMT2	regulation of protein serine/threonine kinase activity	3.60474
740	GO:BP	positive regulation of protein serine/threonine kinase activity	GO:0071902	1	0	145	70	2	21017	PROX1,FERMT2	positive regulation of protein serine/threonine kinase activity	4.2789
741	GO:BP	renal system development	GO:0072001	1	0	331	70	4	21017	NFIA,PROX1,PROM1,MTSS1	renal system development	3.8217
742	GO:BP	nephron development	GO:0072006	1	0	159	70	2	21017	PROM1,MTSS1	nephron development	3.89472
743	GO:BP	nephron epithelium development	GO:0072009	1	0	123	70	2	21017	PROM1,MTSS1	nephron epithelium development	5.06223
744	GO:BP	glomerular epithelium development	GO:0072010	1	0	26	70	1	21017	PROM1	glomerular epithelium development	12.1287
745	GO:BP	kidney epithelium development	GO:0072073	1	0	154	70	2	21017	PROM1,MTSS1	kidney epithelium development	4.0238
746	GO:BP	nephron tubule development	GO:0072080	1	0	102	70	2	21017	PROM1,MTSS1	nephron tubule development	6.13147
747	GO:BP	stem cell proliferation	GO:0072089	1	0	122	70	1	21017	FERMT2	stem cell proliferation	2.49443
748	GO:BP	regulation of stem cell proliferation	GO:0072091	1	0	91	70	1	21017	FERMT2	regulation of stem cell proliferation	3.35862
749	GO:BP	glomerulus morphogenesis	GO:0072102	1	0	9	70	1	21017	MTSS1	glomerulus morphogenesis	37.933
750	GO:BP	podocyte differentiation	GO:0072112	1	0	22	70	1	21017	PROM1	podocyte differentiation	14.4417
751	GO:BP	glomerular parietal epithelial cell differentiation	GO:0072139	1	0	3	70	1	21017	PROM1	glomerular parietal epithelial cell differentiation	151.775
752	GO:BP	epithelial cell fate commitment	GO:0072148	1	0	15	70	1	21017	PROX1	epithelial cell fate commitment	21.6698
753	GO:BP	nephron tubule epithelial cell differentiation	GO:0072160	1	0	15	70	2	21017	PROM1,MTSS1	nephron tubule epithelial cell differentiation	47.362
754	GO:BP	epithelial tube formation	GO:0072175	1	0	135	70	2	21017	SKI,PROX1	epithelial tube formation	4.60283
755	GO:BP	regulation of nephron tubule epithelial cell differentiation	GO:0072182	1	0	13	70	1	21017	PROM1	regulation of nephron tubule epithelial cell differentiation	25.2838
756	GO:BP	ureter development	GO:0072189	1	0	18	70	1	21017	NFIA	ureter development	17.8431
757	GO:BP	glomerular epithelial cell differentiation	GO:0072311	1	0	23	70	1	21017	PROM1	glomerular epithelial cell differentiation	13.7846
758	GO:BP	monocarboxylic acid catabolic process	GO:0072329	1	0	132	70	1	21017	LPIN1	monocarboxylic acid catabolic process	2.30291
759	GO:BP	monocarboxylic acid biosynthetic process	GO:0072330	1	0	218	70	1	21017	PROX1	monocarboxylic acid biosynthetic process	1.38449
760	GO:BP	signal transduction by p53 class mediator	GO:0072331	1	0	182	70	3	21017	MLF1,PLK2,CDKN1A	signal transduction by p53 class mediator	5.19503
761	GO:BP	intrinsic apoptotic signaling pathway by p53 class mediator	GO:0072332	1	0	84	70	1	21017	CDKN1A	intrinsic apoptotic signaling pathway by p53 class mediator	3.64309
762	GO:BP	sulfur compound transport	GO:0072348	1	0	64	70	1	21017	SLC6A6	sulfur compound transport	4.80423
763	GO:BP	organelle transport along microtubule	GO:0072384	1	0	88	70	1	21017	MAPT	organelle transport along microtubule	3.47493
764	GO:BP	phospholipase C-activating angiotensin-activated signaling pathway	GO:0086097	1	0	2	70	1	21017	ACTN2	phospholipase C-activating angiotensin-activated signaling pathway	303.565
765	GO:BP	cellular response to biotic stimulus	GO:0071216	1	0	251	70	1	21017	PRKCA	cellular response to biotic stimulus	1.19983
766	GO:BP	translation at presynapse	GO:0140236	1	0	1	70	1	21017	RPL22	translation at presynapse	607.159
767	GO:BP	cell-cell fusion	GO:0140253	1	0	62	70	1	21017	TMEM182	cell-cell fusion	4.96222
768	GO:BP	organic acid transmembrane transport	GO:1903825	1	0	148	70	2	21017	SLC6A6,SLC1A3	organic acid transmembrane transport	4.19037
769	GO:BP	negative regulation of protein localization	GO:1903828	1	0	212	70	3	21017	ACTN2,MAPT,NEDD4L	negative regulation of protein localization	4.44291
770	GO:BP	positive regulation of protein localization	GO:1903829	1	0	493	70	5	21017	TTN,BAG3,FERMT2,CREBBP,MAPT	positive regulation of protein localization	3.22494
771	GO:BP	regulation of cellular response to transforming growth factor beta stimulus	GO:1903844	1	0	145	70	3	21017	SKI,PRDM16,CREBBP	regulation of cellular response to transforming growth factor beta stimulus	6.56033
772	GO:BP	positive regulation of cellular response to transforming growth factor beta stimulus	GO:1903846	1	0	31	70	1	21017	CREBBP	positive regulation of cellular response to transforming growth factor beta stimulus	10.1048
773	GO:BP	regulation of dendrite extension	GO:1903859	1	0	26	70	1	21017	NEDD4L	regulation of dendrite extension	12.1287
774	GO:BP	positive regulation of dendrite extension	GO:1903861	1	0	23	70	1	21017	NEDD4L	positive regulation of dendrite extension	13.7846
775	GO:BP	regulation of viral life cycle	GO:1903900	1	0	145	70	1	21017	PROX1	regulation of viral life cycle	2.0937
776	GO:BP	regulation of glial cell migration	GO:1903975	1	0	19	70	1	21017	RRAS2	regulation of glial cell migration	16.851
777	GO:BP	positive regulation of glial cell migration	GO:1903977	1	0	11	70	1	21017	RRAS2	positive regulation of glial cell migration	30.3435
778	GO:BP	positive regulation of vasculature development	GO:1904018	1	0	168	70	1	21017	PRKCA	positive regulation of vasculature development	1.80335
779	GO:BP	positive regulation of voltage-gated potassium channel activity	GO:1903818	1	0	12	70	2	21017	RNF207,NOS1AP	positive regulation of voltage-gated potassium channel activity	61.5794
780	GO:BP	regulation of cyclin-dependent protein kinase activity	GO:1904029	1	0	86	70	2	21017	PROX1,CDKN1A	regulation of cyclin-dependent protein kinase activity	7.30497
781	GO:BP	positive regulation of cyclin-dependent protein kinase activity	GO:1904031	1	0	37	70	1	21017	PROX1	positive regulation of cyclin-dependent protein kinase activity	8.41828
782	GO:BP	response to aldosterone	GO:1904044	1	0	19	70	1	21017	CDKN1A	response to aldosterone	16.851
783	GO:BP	regulation of monoatomic cation transmembrane transport	GO:1904062	1	0	282	70	5	21017	RNF207,NOS1AP,ACTN2,PLN,NEDD4L	regulation of monoatomic cation transmembrane transport	5.74007
784	GO:BP	negative regulation of cation transmembrane transport	GO:1904063	1	0	76	70	3	21017	ACTN2,PLN,NEDD4L	negative regulation of cation transmembrane transport	12.8035
785	GO:BP	positive regulation of cation transmembrane transport	GO:1904064	1	0	135	70	3	21017	RNF207,NOS1AP,ACTN2	positive regulation of cation transmembrane transport	7.06072
786	GO:BP	DN4 thymocyte differentiation	GO:1904157	1	0	2	70	1	21017	NFATC3	DN4 thymocyte differentiation	303.565
787	GO:BP	regulation of bile acid metabolic process	GO:1904251	1	0	14	70	1	21017	PROX1	regulation of bile acid metabolic process	23.3378
788	GO:BP	negative regulation of bile acid metabolic process	GO:1904252	1	0	3	70	1	21017	PROX1	negative regulation of bile acid metabolic process	151.775
789	GO:BP	cellular response to angiotensin	GO:1904385	1	0	35	70	2	21017	ACTN2,PRKCA	cellular response to angiotensin	18.6399
790	GO:BP	positive regulation of nitric oxide metabolic process	GO:1904407	1	0	40	70	2	21017	NOS1AP,NFATC3	positive regulation of nitric oxide metabolic process	16.1834
791	GO:BP	negative regulation of tubulin deacetylation	GO:1904428	1	0	6	70	1	21017	MAPT	negative regulation of tubulin deacetylation	60.7014
792	GO:BP	negative regulation of cyclin-dependent protein kinase activity	GO:1904030	1	0	20	70	1	21017	CDKN1A	negative regulation of cyclin-dependent protein kinase activity	15.9634
793	GO:BP	regulation of vascular associated smooth muscle cell proliferation	GO:1904705	1	0	61	70	1	21017	CDKN1A	regulation of vascular associated smooth muscle cell proliferation	5.04517
794	GO:BP	positive regulation of cardiac conduction	GO:1903781	1	0	1	70	1	21017	TBX5	positive regulation of cardiac conduction	607.159
795	GO:BP	positive regulation of SUMO transferase activity	GO:1903755	1	0	1	70	1	21017	UBE2I	positive regulation of SUMO transferase activity	607.159
796	GO:BP	positive regulation of leukocyte cell-cell adhesion	GO:1903039	1	0	271	70	1	21017	SMARCB1	positive regulation of leukocyte cell-cell adhesion	1.10988
797	GO:BP	meiotic cell cycle process	GO:1903046	1	0	220	70	1	21017	PDE3A	meiotic cell cycle process	1.37172
798	GO:BP	mitotic cell cycle process	GO:1903047	1	0	747	70	9	21017	NFIA,LPIN1,TTN,PLK2,CDKN1A,FOXN3,UBE2I,PRKCA,SMARCB1	mitotic cell cycle process	4.04018
799	GO:BP	regulation of actin filament-based movement	GO:1903115	1	0	39	70	2	21017	PLN,PKP2	regulation of actin filament-based movement	16.6216
800	GO:BP	mononuclear cell differentiation	GO:1903131	1	0	529	70	5	21017	KLF6,NFATC3,PRKCA,SMARCB1,RPL22	mononuclear cell differentiation	2.99809
801	GO:BP	regulation of calcium ion transmembrane transport	GO:1903169	1	0	163	70	2	21017	NOS1AP,PLN	regulation of calcium ion transmembrane transport	3.79722
802	GO:BP	negative regulation of calcium ion transmembrane transport	GO:1903170	1	0	44	70	1	21017	PLN	negative regulation of calcium ion transmembrane transport	7.0455
803	GO:BP	regulation of SUMO transferase activity	GO:1903182	1	0	1	70	1	21017	UBE2I	regulation of SUMO transferase activity	607.159
804	GO:BP	regulation of cardiac muscle hypertrophy in response to stress	GO:1903242	1	0	10	70	1	21017	MLIP	regulation of cardiac muscle hypertrophy in response to stress	33.7166
805	GO:BP	negative regulation of cardiac muscle hypertrophy in response to stress	GO:1903243	1	0	6	70	1	21017	MLIP	negative regulation of cardiac muscle hypertrophy in response to stress	60.7014
806	GO:BP	regulation of mRNA metabolic process	GO:1903311	1	0	303	70	1	21017	PRKCA	regulation of mRNA metabolic process	0.990738
807	GO:BP	regulation of cardiac conduction	GO:1903779	1	0	25	70	1	21017	TBX5	regulation of cardiac conduction	12.6347
808	GO:BP	regulation of protein modification by small protein conjugation or removal	GO:1903320	1	0	241	70	1	21017	UBE2I	regulation of protein modification by small protein conjugation or removal	1.25042
809	GO:BP	negative regulation of blood circulation	GO:1903523	1	0	22	70	1	21017	PLN	negative regulation of blood circulation	14.4417
810	GO:BP	regulation of secretion by cell	GO:1903530	1	0	567	70	1	21017	TTN	regulation of secretion by cell	0.521867
811	GO:BP	positive regulation of secretion by cell	GO:1903532	1	0	294	70	1	21017	TTN	positive regulation of secretion by cell	1.02162
812	GO:BP	regulation of gap junction assembly	GO:1903596	1	0	10	70	1	21017	TBX5	regulation of gap junction assembly	33.7166
813	GO:BP	positive regulation of gap junction assembly	GO:1903598	1	0	7	70	1	21017	TBX5	positive regulation of gap junction assembly	50.5821
814	GO:BP	regulation of wound healing, spreading of epidermal cells	GO:1903689	1	0	10	70	1	21017	FERMT2	regulation of wound healing, spreading of epidermal cells	33.7166
815	GO:BP	positive regulation of wound healing, spreading of epidermal cells	GO:1903691	1	0	5	70	1	21017	FERMT2	positive regulation of wound healing, spreading of epidermal cells	75.8804
816	GO:BP	regulation of hemopoiesis	GO:1903706	1	0	420	70	3	21017	MITF,PRKCA,SMARCB1	regulation of hemopoiesis	2.20445
817	GO:BP	positive regulation of hemopoiesis	GO:1903708	1	0	189	70	2	21017	PRKCA,SMARCB1	positive regulation of hemopoiesis	3.26518
818	GO:BP	regulation of establishment of protein localization to mitochondrion	GO:1903747	1	0	47	70	1	21017	MAPT	regulation of establishment of protein localization to mitochondrion	6.58507
819	GO:BP	negative regulation of establishment of protein localization to mitochondrion	GO:1903748	1	0	7	70	1	21017	MAPT	negative regulation of establishment of protein localization to mitochondrion	50.5821
820	GO:BP	release of sequestered calcium ion into cytosol by endoplasmic reticulum	GO:1903514	1	0	35	70	1	21017	PLN	release of sequestered calcium ion into cytosol by endoplasmic reticulum	8.91432
821	GO:BP	negative regulation of vascular associated smooth muscle cell proliferation	GO:1904706	1	0	23	70	1	21017	CDKN1A	negative regulation of vascular associated smooth muscle cell proliferation	13.7846
822	GO:BP	cranial skeletal system development	GO:1904888	1	0	72	70	1	21017	FOXN3	cranial skeletal system development	4.26128
823	GO:BP	negative regulation of establishment of protein localization	GO:1904950	1	0	127	70	1	21017	MAPT	negative regulation of establishment of protein localization	2.39487
824	GO:BP	regulation of protein localization to cell surface	GO:2000008	1	0	41	70	2	21017	ACTN2,NEDD4L	regulation of protein localization to cell surface	15.7677
825	GO:BP	negative regulation of protein localization to cell surface	GO:2000009	1	0	12	70	2	21017	ACTN2,NEDD4L	negative regulation of protein localization to cell surface	61.5794
826	GO:BP	regulation of multicellular organismal development	GO:2000026	1	0	1413	70	11	21017	SKI,PROX1,LPIN1,MITF,PROM1,PLK2,TBX5,ADAMTS7,MAPT,PRKCA,SMARCB1	regulation of multicellular organismal development	2.59913
827	GO:BP	regulation of stem cell population maintenance	GO:2000036	1	0	72	70	1	21017	SMARCB1	regulation of stem cell population maintenance	4.26128
828	GO:BP	regulation of G1/S transition of mitotic cell cycle	GO:2000045	1	0	162	70	3	21017	PLK2,CDKN1A,SMARCB1	regulation of G1/S transition of mitotic cell cycle	5.85413
829	GO:BP	negative regulation of G1/S transition of mitotic cell cycle	GO:2000134	1	0	73	70	2	21017	PLK2,CDKN1A	negative regulation of G1/S transition of mitotic cell cycle	8.64789
830	GO:BP	regulation of cell proliferation involved in heart morphogenesis	GO:2000136	1	0	18	70	1	21017	TBX5	regulation of cell proliferation involved in heart morphogenesis	17.8431
831	GO:BP	regulation of DNA-templated transcription initiation	GO:2000142	1	0	82	70	1	21017	MITF	regulation of DNA-templated transcription initiation	3.7334
832	GO:BP	positive regulation of DNA-templated transcription initiation	GO:2000144	1	0	68	70	1	21017	MITF	positive regulation of DNA-templated transcription initiation	4.51655
833	GO:BP	regulation of cell motility	GO:2000145	1	0	1000	70	10	21017	NEXN,PROX1,RAF1,MITF,PLK2,RRAS2,TBX5,FERMT2,UBE2I,PRKCA	regulation of cell motility	3.35976
834	GO:BP	negative regulation of cell motility	GO:2000146	1	0	304	70	2	21017	MITF,TBX5	negative regulation of cell motility	2.01062
835	GO:BP	response to amino acid starvation	GO:1990928	1	0	54	70	1	21017	CDKN1A	response to amino acid starvation	5.71343
836	GO:BP	positive regulation of cell motility	GO:2000147	1	0	570	70	6	21017	PROX1,PLK2,RRAS2,FERMT2,UBE2I,PRKCA	positive regulation of cell motility	3.38813
837	GO:BP	positive regulation of peptidyl-cysteine S-nitrosylation	GO:2000170	1	0	3	70	1	21017	NOS1AP	positive regulation of peptidyl-cysteine S-nitrosylation	151.775
838	GO:BP	regulation of neural precursor cell proliferation	GO:2000177	1	0	104	70	1	21017	PROX1	regulation of neural precursor cell proliferation	2.93288
839	GO:BP	negative regulation of neural precursor cell proliferation	GO:2000178	1	0	26	70	1	21017	PROX1	negative regulation of neural precursor cell proliferation	12.1287
840	GO:BP	positive regulation of neural precursor cell proliferation	GO:2000179	1	0	64	70	1	21017	PROX1	positive regulation of neural precursor cell proliferation	4.80423
841	GO:BP	negative regulation of blood vessel morphogenesis	GO:2000181	1	0	105	70	1	21017	PLK2	negative regulation of blood vessel morphogenesis	2.90454
842	GO:BP	regulation of pseudohyphal growth	GO:2000220	1	0	1	70	1	21017	SMARCB1	regulation of pseudohyphal growth	607.159
843	GO:BP	positive regulation of pseudohyphal growth	GO:2000222	1	0	1	70	1	21017	SMARCB1	positive regulation of pseudohyphal growth	607.159
844	GO:BP	regulation of reproductive process	GO:2000241	1	0	206	70	1	21017	PDE3A	regulation of reproductive process	1.46638
845	GO:BP	positive regulation of reproductive process	GO:2000243	1	0	90	70	1	21017	PDE3A	positive regulation of reproductive process	3.39652
846	GO:BP	regulation of DNA biosynthetic process	GO:2000278	1	0	101	70	1	21017	CDKN1A	regulation of DNA biosynthetic process	3.0213
847	GO:BP	negative regulation of DNA biosynthetic process	GO:2000279	1	0	32	70	1	21017	CDKN1A	negative regulation of DNA biosynthetic process	9.7784
848	GO:BP	regulation of peptidyl-cysteine S-nitrosylation	GO:2000169	1	0	9	70	1	21017	NOS1AP	regulation of peptidyl-cysteine S-nitrosylation	37.933
849	GO:BP	vascular associated smooth muscle cell proliferation	GO:1990874	1	0	63	70	1	21017	CDKN1A	vascular associated smooth muscle cell proliferation	4.88195
850	GO:BP	cellular response to lectin	GO:1990858	1	0	22	70	1	21017	CREBBP	cellular response to lectin	14.4417
851	GO:BP	adaptive thermogenesis	GO:1990845	1	0	170	70	2	21017	PRDM16,LPIN1	adaptive thermogenesis	3.63778
852	GO:BP	positive regulation of establishment of protein localization	GO:1904951	1	0	332	70	2	21017	TTN,BAG3	positive regulation of establishment of protein localization	1.83752
853	GO:BP	autophagosome organization	GO:1905037	1	0	120	70	1	21017	BAG3	autophagosome organization	2.5366
854	GO:BP	carboxylic acid transmembrane transport	GO:1905039	1	0	143	70	1	21017	SLC1A3	carboxylic acid transmembrane transport	2.12339
855	GO:BP	regulation of vascular associated smooth muscle cell differentiation	GO:1905063	1	0	14	70	1	21017	NFATC3	regulation of vascular associated smooth muscle cell differentiation	23.3378
856	GO:BP	negative regulation of vascular associated smooth muscle cell differentiation	GO:1905064	1	0	8	70	1	21017	NFATC3	negative regulation of vascular associated smooth muscle cell differentiation	43.354
857	GO:BP	regulation of cardiac muscle tissue regeneration	GO:1905178	1	0	2	70	1	21017	CDKN1A	regulation of cardiac muscle tissue regeneration	303.565
858	GO:BP	negative regulation of cardiac muscle tissue regeneration	GO:1905179	1	0	2	70	1	21017	CDKN1A	negative regulation of cardiac muscle tissue regeneration	303.565
859	GO:BP	regulation of cardiocyte differentiation	GO:1905207	1	0	26	70	1	21017	TBX5	regulation of cardiocyte differentiation	12.1287
860	GO:BP	positive regulation of cardiocyte differentiation	GO:1905209	1	0	14	70	1	21017	TBX5	positive regulation of cardiocyte differentiation	23.3378
861	GO:BP	regulation of morphogenesis of an epithelium	GO:1905330	1	0	65	70	1	21017	RNF207	regulation of morphogenesis of an epithelium	4.72894
862	GO:BP	regulation of artery morphogenesis	GO:1905651	1	0	7	70	1	21017	NFATC3	regulation of artery morphogenesis	50.5821
863	GO:BP	positive regulation of artery morphogenesis	GO:1905653	1	0	7	70	1	21017	NFATC3	positive regulation of artery morphogenesis	50.5821
864	GO:BP	regulation of diacylglycerol kinase activity	GO:1905687	1	0	1	70	1	21017	MAPT	regulation of diacylglycerol kinase activity	607.159
865	GO:BP	positive regulation of diacylglycerol kinase activity	GO:1905689	1	0	1	70	1	21017	MAPT	positive regulation of diacylglycerol kinase activity	607.159
866	GO:BP	regulation of oogenesis	GO:1905879	1	0	3	70	1	21017	PDE3A	regulation of oogenesis	151.775
867	GO:BP	glutamatergic neuron differentiation	GO:1905962	1	0	18	70	1	21017	PROX1	glutamatergic neuron differentiation	17.8431
868	GO:BP	amyloid fibril formation	GO:1990000	1	0	41	70	1	21017	MAPT	amyloid fibril formation	7.575
869	GO:BP	calcium ion import into sarcoplasmic reticulum	GO:1990036	1	0	6	70	1	21017	PLN	calcium ion import into sarcoplasmic reticulum	60.7014
870	GO:BP	response to nerve growth factor	GO:1990089	1	0	50	70	1	21017	MAPT	response to nerve growth factor	6.18101
871	GO:BP	cellular response to nerve growth factor stimulus	GO:1990090	1	0	48	70	1	21017	MAPT	cellular response to nerve growth factor stimulus	6.44465
872	GO:BP	neuron projection extension	GO:1990138	1	0	181	70	2	21017	MAPT,NEDD4L	neuron projection extension	3.41242
873	GO:BP	cellular response to brain-derived neurotrophic factor stimulus	GO:1990416	1	0	9	70	1	21017	MAPT	cellular response to brain-derived neurotrophic factor stimulus	37.933
874	GO:BP	response to angiotensin	GO:1990776	1	0	42	70	2	21017	ACTN2,PRKCA	response to angiotensin	15.3728
875	GO:BP	protein localization to cell periphery	GO:1990778	1	0	361	70	2	21017	ACTN2,PKP2	protein localization to cell periphery	1.68671
876	GO:BP	response to lectin	GO:1990840	1	0	22	70	1	21017	CREBBP	response to lectin	14.4417
877	GO:BP	regulation of leukocyte cell-cell adhesion	GO:1903037	1	0	366	70	1	21017	SMARCB1	regulation of leukocyte cell-cell adhesion	0.817232
878	GO:BP	translation at synapse	GO:0140241	1	0	1	70	1	21017	RPL22	translation at synapse	607.159
879	GO:BP	positive regulation of response to wounding	GO:1903036	1	0	75	70	1	21017	FERMT2	positive regulation of response to wounding	4.08794
880	GO:BP	neurofibrillary tangle assembly	GO:1902988	1	0	3	70	1	21017	MAPT	neurofibrillary tangle assembly	151.775
881	GO:BP	regulation of calcium ion transmembrane transporter activity	GO:1901019	1	0	68	70	2	21017	NOS1AP,PLN	regulation of calcium ion transmembrane transporter activity	9.30526
882	GO:BP	negative regulation of calcium ion transmembrane transporter activity	GO:1901020	1	0	27	70	1	21017	PLN	negative regulation of calcium ion transmembrane transporter activity	11.6616
883	GO:BP	regulation of relaxation of muscle	GO:1901077	1	0	14	70	1	21017	PLN	regulation of relaxation of muscle	23.3378
884	GO:BP	carbohydrate derivative metabolic process	GO:1901135	1	0	992	70	2	21017	TKT,ADAMTS7	carbohydrate derivative metabolic process	0.5929
885	GO:BP	carbohydrate derivative biosynthetic process	GO:1901137	1	0	610	70	1	21017	TKT	carbohydrate derivative biosynthetic process	0.483996
886	GO:BP	xylulose 5-phosphate biosynthetic process	GO:1901159	1	0	6	70	1	21017	TKT	xylulose 5-phosphate biosynthetic process	60.7014
887	GO:BP	regulation of heart looping	GO:1901207	1	0	2	70	1	21017	RNF207	regulation of heart looping	303.565
888	GO:BP	regulation of vasculature development	GO:1901342	1	0	295	70	2	21017	PLK2,PRKCA	regulation of vasculature development	2.07328
889	GO:BP	negative regulation of vasculature development	GO:1901343	1	0	106	70	1	21017	PLK2	negative regulation of vasculature development	2.87674
890	GO:BP	negative regulation of potassium ion transmembrane transport	GO:1901380	1	0	22	70	2	21017	ACTN2,NEDD4L	negative regulation of potassium ion transmembrane transport	30.775
891	GO:BP	regulation of voltage-gated calcium channel activity	GO:1901385	1	0	26	70	1	21017	NOS1AP	regulation of voltage-gated calcium channel activity	12.1287
892	GO:BP	negative regulation of potassium ion transmembrane transporter activity	GO:1901017	1	0	16	70	2	21017	ACTN2,NEDD4L	negative regulation of potassium ion transmembrane transporter activity	43.9769
893	GO:BP	organic hydroxy compound metabolic process	GO:1901615	1	0	549	70	1	21017	PROX1	organic hydroxy compound metabolic process	0.539485
894	GO:BP	response to peptide	GO:1901652	1	0	950	70	3	21017	RAF1,ADAMTS7,PRKCA	response to peptide	0.945641
895	GO:BP	response to ketone	GO:1901654	1	0	221	70	2	21017	CDKN1A,FBXO32	response to ketone	2.78378
896	GO:BP	cellular response to ketone	GO:1901655	1	0	111	70	1	21017	FBXO32	cellular response to ketone	2.74532
897	GO:BP	response to nitrogen compound	GO:1901698	1	0	1010	70	7	21017	ACTN2,LPIN1,RAF1,GNRHR,SLC1A3,PDE3A,PRKCA	response to nitrogen compound	2.20937
898	GO:BP	cellular response to nitrogen compound	GO:1901699	1	0	618	70	7	21017	ACTN2,LPIN1,RAF1,GNRHR,SLC1A3,PDE3A,PRKCA	cellular response to nitrogen compound	3.69813
899	GO:BP	response to oxygen-containing compound	GO:1901700	1	0	1632	70	11	21017	ACTN2,LPIN1,RAF1,GNRHR,SLC1A3,CDKN1A,FBXO32,PDE3A,MAPT,PRKCA,SMARCB1	response to oxygen-containing compound	2.2228
900	GO:BP	cellular response to oxygen-containing compound	GO:1901701	1	0	1153	70	10	21017	ACTN2,LPIN1,RAF1,GNRHR,SLC1A3,FBXO32,PDE3A,MAPT,PRKCA,SMARCB1	cellular response to oxygen-containing compound	2.88772
901	GO:BP	regulation of myoblast fusion	GO:1901739	1	0	21	70	1	21017	TMEM182	regulation of myoblast fusion	15.1645
902	GO:BP	negative regulation of myoblast fusion	GO:1901740	1	0	3	70	1	21017	TMEM182	negative regulation of myoblast fusion	151.775
903	GO:BP	regulation of signal transduction by p53 class mediator	GO:1901796	1	0	110	70	1	21017	MLF1	regulation of signal transduction by p53 class mediator	2.77064
904	GO:BP	regulation of transcription of nucleolar large rRNA by RNA polymerase I	GO:1901836	1	0	15	70	1	21017	SMARCB1	regulation of transcription of nucleolar large rRNA by RNA polymerase I	21.6698
905	GO:BP	organic hydroxy compound biosynthetic process	GO:1901617	1	0	243	70	1	21017	PROX1	organic hydroxy compound biosynthetic process	1.23997
906	GO:BP	positive regulation of transcription of nucleolar large rRNA by RNA polymerase I	GO:1901838	1	0	10	70	1	21017	SMARCB1	positive regulation of transcription of nucleolar large rRNA by RNA polymerase I	33.7166
907	GO:BP	positive regulation of pseudohyphal growth by positive regulation of transcription from RNA polymerase II promoter	GO:1900461	1	0	1	70	1	21017	SMARCB1	positive regulation of pseudohyphal growth by positive regulation of transcription from RNA polymerase II promoter	607.159
908	GO:BP	positive regulation of filamentous growth of a population of unicellular organisms	GO:1900430	1	0	1	70	1	21017	SMARCB1	positive regulation of filamentous growth of a population of unicellular organisms	607.159
909	GO:BP	export from cell	GO:0140352	1	0	901	70	3	21017	TTN,RAF1,GNRHR	export from cell	0.999684
910	GO:BP	defense response to symbiont	GO:0140546	1	0	1125	70	2	21017	RAF1,CREBBP	defense response to symbiont	0.519198
911	GO:BP	interferon-mediated signaling pathway	GO:0140888	1	0	107	70	1	21017	RAF1	interferon-mediated signaling pathway	2.84947
912	GO:BP	transforming growth factor beta receptor superfamily signaling pathway	GO:0141091	1	0	341	70	5	21017	SKI,PRDM16,NFIA,FERMT2,CREBBP	transforming growth factor beta receptor superfamily signaling pathway	4.71864
913	GO:BP	positive regulation of gene expression, epigenetic	GO:0141137	1	0	44	70	1	21017	SMARCB1	positive regulation of gene expression, epigenetic	7.0455
914	GO:BP	nucleic acid biosynthetic process	GO:0141187	1	0	6822	70	24	21017	SKI,PRDM16,NFIA,PROX1,ACTN2,LPIN1,RAF1,MITF,MLF1,CDKN1A,MLIP,KLF6,PGR,TBX5,FOXN3,UBE2I,CREBBP,NFATC3,HLF,NCOA6,BACH1,SMARCB1,E2F6,BRWD1	nucleic acid biosynthetic process	1.08592
915	GO:BP	nucleic acid catabolic process	GO:0141188	1	0	335	70	1	21017	PRKCA	nucleic acid catabolic process	0.894429
916	GO:BP	nuclear receptor-mediated signaling pathway	GO:0141193	1	0	179	70	1	21017	PGR	nuclear receptor-mediated signaling pathway	1.69101
917	GO:BP	visual system development	GO:0150063	1	0	408	70	5	21017	SKI,NFIA,PROX1,MITF,PROM1	visual system development	3.92136
918	GO:BP	neuroinflammatory response	GO:0150076	1	0	77	70	1	21017	MAPT	neuroinflammatory response	3.97998
919	GO:BP	transport across blood-brain barrier	GO:0150104	1	0	87	70	2	21017	SLC6A6,SLC1A3	transport across blood-brain barrier	7.21869
920	GO:BP	regulation of long-term synaptic depression	GO:1900452	1	0	15	70	1	21017	MAPT	regulation of long-term synaptic depression	21.6698
921	GO:BP	cell-substrate junction organization	GO:0150115	1	0	103	70	2	21017	ACTN2,FERMT2	cell-substrate junction organization	6.07047
922	GO:BP	positive regulation of cell-substrate junction organization	GO:0150117	1	0	31	70	1	21017	FERMT2	positive regulation of cell-substrate junction organization	10.1048
923	GO:BP	non-proteinogenic amino acid metabolic process	GO:0170041	1	0	69	70	1	21017	SLC1A3	non-proteinogenic amino acid metabolic process	4.44991
924	GO:BP	non-proteinogenic amino acid biosynthetic process	GO:0170043	1	0	17	70	1	21017	SLC1A3	non-proteinogenic amino acid biosynthetic process	18.9592
925	GO:BP	regulation of substrate adhesion-dependent cell spreading	GO:1900024	1	0	62	70	2	21017	PKP2,FERMT2	regulation of substrate adhesion-dependent cell spreading	10.2387
926	GO:BP	positive regulation of substrate adhesion-dependent cell spreading	GO:1900026	1	0	43	70	1	21017	FERMT2	positive regulation of substrate adhesion-dependent cell spreading	7.2136
927	GO:BP	regulation of cellular response to heat	GO:1900034	1	0	16	70	2	21017	CREBBP,MAPT	regulation of cellular response to heat	43.9769
928	GO:BP	regulation of Schwann cell migration	GO:1900147	1	0	5	70	1	21017	RRAS2	regulation of Schwann cell migration	75.8804
929	GO:BP	positive regulation of Schwann cell migration	GO:1900149	1	0	2	70	1	21017	RRAS2	positive regulation of Schwann cell migration	303.565
930	GO:BP	regulation of protein localization to nucleus	GO:1900180	1	0	149	70	3	21017	BAG3,FERMT2,CREBBP	regulation of protein localization to nucleus	6.37937
931	GO:BP	positive regulation of protein localization to nucleus	GO:1900182	1	0	97	70	3	21017	BAG3,FERMT2,CREBBP	positive regulation of protein localization to nucleus	9.93315
932	GO:BP	regulation of filamentous growth of a population of unicellular organisms	GO:1900428	1	0	1	70	1	21017	SMARCB1	regulation of filamentous growth of a population of unicellular organisms	607.159
933	GO:BP	regulation of cell-substrate junction organization	GO:0150116	1	0	68	70	1	21017	FERMT2	regulation of cell-substrate junction organization	4.51655
934	GO:BP	regulation of high voltage-gated calcium channel activity	GO:1901841	1	0	12	70	1	21017	NOS1AP	regulation of high voltage-gated calcium channel activity	27.5837
935	GO:BP	regulation of cell communication by electrical coupling involved in cardiac conduction	GO:1901844	1	0	12	70	1	21017	TBX5	regulation of cell communication by electrical coupling involved in cardiac conduction	27.5837
936	GO:BP	positive regulation of cell communication by electrical coupling involved in cardiac conduction	GO:1901846	1	0	2	70	1	21017	TBX5	positive regulation of cell communication by electrical coupling involved in cardiac conduction	303.565
937	GO:BP	protein localization to cell junction	GO:1902414	1	0	111	70	2	21017	FERMT2,MAPT	protein localization to cell junction	5.62277
938	GO:BP	positive regulation of stem cell population maintenance	GO:1902459	1	0	48	70	1	21017	SMARCB1	positive regulation of stem cell population maintenance	6.44465
939	GO:BP	regulation of mesenchymal stem cell proliferation	GO:1902460	1	0	7	70	1	21017	FERMT2	regulation of mesenchymal stem cell proliferation	50.5821
940	GO:BP	positive regulation of mesenchymal stem cell proliferation	GO:1902462	1	0	7	70	1	21017	FERMT2	positive regulation of mesenchymal stem cell proliferation	50.5821
941	GO:BP	regulation of protein localization to synapse	GO:1902473	1	0	23	70	1	21017	MAPT	regulation of protein localization to synapse	13.7846
942	GO:BP	positive regulation of protein localization to synapse	GO:1902474	1	0	6	70	1	21017	MAPT	positive regulation of protein localization to synapse	60.7014
943	GO:BP	L-alpha-amino acid transmembrane transport	GO:1902475	1	0	72	70	1	21017	SLC1A3	L-alpha-amino acid transmembrane transport	4.26128
944	GO:BP	chloride transmembrane transport	GO:1902476	1	0	107	70	1	21017	SLC1A3	chloride transmembrane transport	2.84947
945	GO:BP	regulation of calcium ion transmembrane transport via high voltage-gated calcium channel	GO:1902514	1	0	16	70	1	21017	NOS1AP	regulation of calcium ion transmembrane transport via high voltage-gated calcium channel	20.2242
946	GO:BP	regulation of intracellular signal transduction	GO:1902531	1	0	1935	70	13	21017	SKI,NOS1AP,PROX1,OBSCN,RAF1,MLF1,PLK2,SYNPO2L,PDE3A,FERMT2,AKAP13,MAPT,PRKCA	regulation of intracellular signal transduction	2.25756
947	GO:BP	negative regulation of intracellular signal transduction	GO:1902532	1	0	640	70	2	21017	SKI,PDE3A	negative regulation of intracellular signal transduction	0.936244
948	GO:BP	melanocyte apoptotic process	GO:1902362	1	0	2	70	1	21017	MITF	melanocyte apoptotic process	303.565
949	GO:BP	positive regulation of intracellular signal transduction	GO:1902533	1	0	1108	70	8	21017	NOS1AP,PROX1,RAF1,PLK2,SYNPO2L,FERMT2,AKAP13,PRKCA	positive regulation of intracellular signal transduction	2.32809
950	GO:BP	positive regulation of glucose mediated signaling pathway	GO:1902661	1	0	3	70	1	21017	SMARCB1	positive regulation of glucose mediated signaling pathway	151.775
951	GO:BP	negative regulation of RNA biosynthetic process	GO:1902679	1	0	1352	70	11	21017	SKI,PRDM16,PROX1,MITF,MLIP,FOXN3,UBE2I,CREBBP,NFATC3,BACH1,E2F6	negative regulation of RNA biosynthetic process	2.72584
952	GO:BP	regulation of neuroblast proliferation	GO:1902692	1	0	53	70	1	21017	PROX1	regulation of neuroblast proliferation	5.82358
953	GO:BP	regulation of cell cycle G2/M phase transition	GO:1902749	1	0	117	70	2	21017	CDKN1A,FOXN3	regulation of cell cycle G2/M phase transition	5.32788
954	GO:BP	negative regulation of cell cycle G2/M phase transition	GO:1902750	1	0	69	70	2	21017	CDKN1A,FOXN3	negative regulation of cell cycle G2/M phase transition	9.16594
955	GO:BP	regulation of cell cycle G1/S phase transition	GO:1902806	1	0	188	70	4	21017	MLF1,PLK2,CDKN1A,SMARCB1	regulation of cell cycle G1/S phase transition	6.83893
956	GO:BP	negative regulation of cell cycle G1/S phase transition	GO:1902807	1	0	79	70	2	21017	PLK2,CDKN1A	negative regulation of cell cycle G1/S phase transition	7.97173
957	GO:BP	microtubule cytoskeleton organization involved in mitosis	GO:1902850	1	0	169	70	1	21017	PLK2	microtubule cytoskeleton organization involved in mitosis	1.79253
958	GO:BP	regulation of miRNA transcription	GO:1902893	1	0	76	70	1	21017	NFATC3	regulation of miRNA transcription	4.03324
959	GO:BP	negative regulation of miRNA transcription	GO:1902894	1	0	28	70	1	21017	NFATC3	negative regulation of miRNA transcription	11.2292
960	GO:BP	negative regulation of supramolecular fiber organization	GO:1902904	1	0	164	70	2	21017	SVIL,FHOD3	negative regulation of supramolecular fiber organization	3.7736
961	GO:BP	regulation of glucose mediated signaling pathway	GO:1902659	1	0	3	70	1	21017	SMARCB1	regulation of glucose mediated signaling pathway	151.775
962	GO:BP	negative regulation of sodium ion transmembrane transport	GO:1902306	1	0	9	70	1	21017	NEDD4L	negative regulation of sodium ion transmembrane transport	37.933
963	GO:BP	regulation of sodium ion transmembrane transport	GO:1902305	1	0	45	70	1	21017	NEDD4L	regulation of sodium ion transmembrane transport	6.88505
964	GO:BP	regulation of delayed rectifier potassium channel activity	GO:1902259	1	0	17	70	2	21017	RNF207,NOS1AP	regulation of delayed rectifier potassium channel activity	41.0431
965	GO:BP	regulation of post-translational protein modification	GO:1901873	1	0	246	70	1	21017	UBE2I	regulation of post-translational protein modification	1.22461
966	GO:BP	regulation of calcium ion binding	GO:1901876	1	0	2	70	1	21017	PLN	regulation of calcium ion binding	303.565
967	GO:BP	negative regulation of calcium ion binding	GO:1901877	1	0	2	70	1	21017	PLN	negative regulation of calcium ion binding	303.565
968	GO:BP	regulation of protein depolymerization	GO:1901879	1	0	88	70	2	21017	ACTN2,SVIL	regulation of protein depolymerization	7.1344
969	GO:BP	negative regulation of protein depolymerization	GO:1901880	1	0	72	70	1	21017	SVIL	negative regulation of protein depolymerization	4.26128
970	GO:BP	positive regulation of protein depolymerization	GO:1901881	1	0	19	70	1	21017	ACTN2	positive regulation of protein depolymerization	16.851
971	GO:BP	regulation of cell junction assembly	GO:1901888	1	0	211	70	3	21017	PDLIM5,TBX5,FERMT2	regulation of cell junction assembly	4.46448
972	GO:BP	positive regulation of cell junction assembly	GO:1901890	1	0	107	70	2	21017	TBX5,FERMT2	positive regulation of cell junction assembly	5.8381
973	GO:BP	regulation of ATPase-coupled calcium transmembrane transporter activity	GO:1901894	1	0	7	70	1	21017	PLN	regulation of ATPase-coupled calcium transmembrane transporter activity	50.5821
974	GO:BP	negative regulation of ATPase-coupled calcium transmembrane transporter activity	GO:1901895	1	0	3	70	1	21017	PLN	negative regulation of ATPase-coupled calcium transmembrane transporter activity	151.775
975	GO:BP	regulation of relaxation of cardiac muscle	GO:1901897	1	0	6	70	1	21017	PLN	regulation of relaxation of cardiac muscle	60.7014
976	GO:BP	regulation of cell cycle checkpoint	GO:1901976	1	0	45	70	1	21017	PROX1	regulation of cell cycle checkpoint	6.88505
977	GO:BP	positive regulation of cell cycle checkpoint	GO:1901978	1	0	19	70	1	21017	PROX1	positive regulation of cell cycle checkpoint	16.851
978	GO:BP	regulation of cell cycle phase transition	GO:1901987	1	0	433	70	6	21017	PROX1,MLF1,PLK2,CDKN1A,FOXN3,SMARCB1	regulation of cell cycle phase transition	4.50527
979	GO:BP	negative regulation of cell cycle phase transition	GO:1901988	1	0	259	70	4	21017	PROX1,PLK2,CDKN1A,FOXN3	negative regulation of cell cycle phase transition	4.91788
980	GO:BP	regulation of mitotic cell cycle phase transition	GO:1901990	1	0	333	70	4	21017	PLK2,CDKN1A,FOXN3,SMARCB1	regulation of mitotic cell cycle phase transition	3.7981
981	GO:BP	negative regulation of mitotic cell cycle phase transition	GO:1901991	1	0	182	70	3	21017	PLK2,CDKN1A,FOXN3	negative regulation of mitotic cell cycle phase transition	5.19503
982	GO:BP	regulation of extrinsic apoptotic signaling pathway via death domain receptors	GO:1902041	1	0	46	70	1	21017	RAF1	regulation of extrinsic apoptotic signaling pathway via death domain receptors	6.73172
983	GO:BP	negative regulation of extrinsic apoptotic signaling pathway via death domain receptors	GO:1902042	1	0	29	70	1	21017	RAF1	negative regulation of extrinsic apoptotic signaling pathway via death domain receptors	10.8276
984	GO:BP	regulation of calcium ion import into sarcoplasmic reticulum	GO:1902080	1	0	4	70	1	21017	PLN	regulation of calcium ion import into sarcoplasmic reticulum	101.179
985	GO:BP	negative regulation of calcium ion import into sarcoplasmic reticulum	GO:1902081	1	0	2	70	1	21017	PLN	negative regulation of calcium ion import into sarcoplasmic reticulum	303.565
986	GO:BP	regulation of metaphase/anaphase transition of cell cycle	GO:1902099	1	0	93	70	1	21017	SMARCB1	regulation of metaphase/anaphase transition of cell cycle	3.28529
987	GO:BP	regulation of leukocyte differentiation	GO:1902105	1	0	325	70	3	21017	MITF,PRKCA,SMARCB1	regulation of leukocyte differentiation	2.86804
988	GO:BP	positive regulation of leukocyte differentiation	GO:1902107	1	0	189	70	2	21017	PRKCA,SMARCB1	positive regulation of leukocyte differentiation	3.26518
989	GO:BP	regulation of organelle assembly	GO:1902115	1	0	224	70	1	21017	PLK2	regulation of organelle assembly	1.34685
990	GO:BP	regulation of response to wounding	GO:1903034	1	0	169	70	1	21017	FERMT2	regulation of response to wounding	1.79253
991	GO:BP	cellular response to abiotic stimulus	GO:0071214	1	0	333	70	3	21017	CDKN1A,BAG3,CREBBP	cellular response to abiotic stimulus	2.79742
992	GO:BP	bone maturation	GO:0070977	1	0	29	70	1	21017	ADAMTS7	bone maturation	10.8276
993	GO:BP	protein K48-linked ubiquitination	GO:0070936	1	0	82	70	2	21017	UBE2D2,NEDD4L	protein K48-linked ubiquitination	7.67169
994	GO:BP	positive regulation of transport	GO:0051050	1	0	844	70	7	21017	RNF207,NOS1AP,ACTN2,TTN,BAG3,PKP2,NEDD4L	positive regulation of transport	2.66959
995	GO:BP	negative regulation of transport	GO:0051051	1	0	412	70	3	21017	ACTN2,PLN,NEDD4L	negative regulation of transport	2.24844
996	GO:BP	regulation of DNA metabolic process	GO:0051052	1	0	492	70	3	21017	LPIN1,CDKN1A,SMARCB1	regulation of DNA metabolic process	1.87327
997	GO:BP	negative regulation of DNA metabolic process	GO:0051053	1	0	135	70	1	21017	CDKN1A	negative regulation of DNA metabolic process	2.25103
998	GO:BP	positive regulation of DNA metabolic process	GO:0051054	1	0	284	70	3	21017	LPIN1,CDKN1A,SMARCB1	positive regulation of DNA metabolic process	3.29304
999	GO:BP	negative regulation of lipid biosynthetic process	GO:0051055	1	0	57	70	1	21017	PROX1	negative regulation of lipid biosynthetic process	5.40657
1000	GO:BP	regulation of small GTPase mediated signal transduction	GO:0051056	1	0	306	70	4	21017	OBSCN,RAF1,SYNPO2L,AKAP13	regulation of small GTPase mediated signal transduction	4.14309
1001	GO:BP	positive regulation of small GTPase mediated signal transduction	GO:0051057	1	0	77	70	2	21017	SYNPO2L,AKAP13	positive regulation of small GTPase mediated signal transduction	8.1851
1002	GO:BP	nuclear membrane disassembly	GO:0051081	1	0	11	70	2	21017	LPIN1,PRKCA	nuclear membrane disassembly	68.4248
1003	GO:BP	de novo' post-translational protein folding	GO:0051084	1	0	36	70	1	21017	DNAJC18	de novo' post-translational protein folding	8.65921
1004	GO:BP	chaperone cofactor-dependent protein refolding	GO:0051085	1	0	31	70	1	21017	DNAJC18	chaperone cofactor-dependent protein refolding	10.1048
1005	GO:BP	regulation of transport	GO:0051049	1	0	1589	70	9	21017	RNF207,NOS1AP,ACTN2,TTN,PLN,BAG3,PKP2,NEDD4L,DMPK	regulation of transport	1.8085
1006	GO:BP	regulation of DNA-binding transcription factor activity	GO:0051090	1	0	346	70	2	21017	PROX1,SMARCB1	regulation of DNA-binding transcription factor activity	1.76154
1007	GO:BP	positive regulation of developmental process	GO:0051094	1	0	1331	70	11	21017	PROX1,SLC6A6,PROM1,PDE3A,TBX5,FERMT2,NFATC3,MAPT,PRKCA,NEDD4L,SMARCB1	positive regulation of developmental process	2.77218
1008	GO:BP	regulation of binding	GO:0051098	1	0	231	70	3	21017	SKI,CDKN1A,PLN	regulation of binding	4.06893
1009	GO:BP	positive regulation of binding	GO:0051099	1	0	116	70	1	21017	SKI	positive regulation of binding	2.62533
1010	GO:BP	negative regulation of binding	GO:0051100	1	0	104	70	2	21017	CDKN1A,PLN	negative regulation of binding	6.01067
1011	GO:BP	regulation of DNA binding	GO:0051101	1	0	77	70	1	21017	SKI	regulation of DNA binding	3.97998
1012	GO:BP	negative regulation of cellular component organization	GO:0051129	1	0	719	70	5	21017	TMEM182,RAF1,SVIL,MAPT,FHOD3	negative regulation of cellular component organization	2.17981
1013	GO:BP	positive regulation of cellular component organization	GO:0051130	1	0	1093	70	8	21017	PROX1,ACTN2,MTSS1,SYNPO2L,TBX5,FERMT2,MAPT,NEDD4L	positive regulation of cellular component organization	2.36206
1014	GO:BP	smooth muscle cell differentiation	GO:0051145	1	0	65	70	1	21017	NFATC3	smooth muscle cell differentiation	4.72894
1015	GO:BP	regulation of muscle cell differentiation	GO:0051147	1	0	142	70	3	21017	PROX1,NFATC3,DMPK	regulation of muscle cell differentiation	6.70289
1016	GO:BP	negative regulation of muscle cell differentiation	GO:0051148	1	0	62	70	1	21017	NFATC3	negative regulation of muscle cell differentiation	4.96222
1017	GO:BP	positive regulation of muscle cell differentiation	GO:0051149	1	0	68	70	1	21017	PROX1	positive regulation of muscle cell differentiation	4.51655
1018	GO:BP	positive regulation of DNA-binding transcription factor activity	GO:0051091	1	0	209	70	1	21017	SMARCB1	positive regulation of DNA-binding transcription factor activity	1.44503
1019	GO:BP	regulation of smooth muscle cell differentiation	GO:0051150	1	0	36	70	1	21017	NFATC3	regulation of smooth muscle cell differentiation	8.65921
1020	GO:BP	positive regulation of secretion	GO:0051047	1	0	317	70	1	21017	TTN	positive regulation of secretion	0.946203
1021	GO:BP	actin filament bundle assembly	GO:0051017	1	0	159	70	3	21017	MTSS1,SYNPO2L,FERMT2	actin filament bundle assembly	5.96757
1022	GO:BP	regulation of T cell activation	GO:0050863	1	0	375	70	1	21017	SMARCB1	regulation of T cell activation	0.797218
1023	GO:BP	regulation of B cell activation	GO:0050864	1	0	132	70	1	21017	CDKN1A	regulation of B cell activation	2.30291
1024	GO:BP	regulation of cell activation	GO:0050865	1	0	616	70	3	21017	CDKN1A,PRKCA,SMARCB1	regulation of cell activation	1.48528
1025	GO:BP	positive regulation of cell activation	GO:0050867	1	0	372	70	2	21017	CDKN1A,SMARCB1	positive regulation of cell activation	1.63569
1026	GO:BP	positive regulation of T cell activation	GO:0050870	1	0	248	70	1	21017	SMARCB1	positive regulation of T cell activation	1.21457
1027	GO:BP	positive regulation of B cell activation	GO:0050871	1	0	86	70	1	21017	CDKN1A	positive regulation of B cell activation	3.55703
1028	GO:BP	brown fat cell differentiation	GO:0050873	1	0	55	70	1	21017	PRDM16	brown fat cell differentiation	5.60735
1029	GO:BP	nervous system process	GO:0050877	1	0	1489	70	7	21017	LPIN1,SLC1A3,PLK2,VTI1A,MAPT,DMPK,UBA6	nervous system process	1.45936
1030	GO:BP	regulation of body fluid levels	GO:0050878	1	0	371	70	1	21017	PRKCA	regulation of body fluid levels	0.805993
1031	GO:BP	multicellular organismal movement	GO:0050879	1	0	61	70	2	21017	VTI1A,DMPK	multicellular organismal movement	10.4128
1032	GO:BP	musculoskeletal movement	GO:0050881	1	0	59	70	2	21017	VTI1A,DMPK	musculoskeletal movement	10.7792
1033	GO:BP	regulation of secretion	GO:0051046	1	0	621	70	1	21017	TTN	regulation of secretion	0.475152
1034	GO:BP	voluntary musculoskeletal movement	GO:0050882	1	0	7	70	1	21017	VTI1A	voluntary musculoskeletal movement	50.5821
1035	GO:BP	endocrine process	GO:0050886	1	0	93	70	1	21017	GNRHR	endocrine process	3.28529
1036	GO:BP	cognition	GO:0050890	1	0	324	70	3	21017	PLK2,MAPT,UBA6	cognition	2.87711
1037	GO:BP	response to stimulus	GO:0050896	1	0	8993	70	42	21017	SKI,PRDM16,HSPB7,MAST2,NFIA,NOS1AP,PROX1,OBSCN,ACTN2,LPIN1,STRN,TTN,RAF1,MITF,MLF1,GNRHR,SLC1A3,PLK2,CDKN1A,MLIP,PLN,FBXO32,MTSS1,SYNPO2L,BAG3,RRAS2,PGR,PDE3A,HSPB8,FERMT2,FOXN3,ADAMTS7,AKAP13,CREBBP,NFATC3,MAPT,PRKCA,DMPK,NCOA6,BACH1,SMARCB1,DNAJC18	response to stimulus	2.01028
1038	GO:BP	neuromuscular process	GO:0050905	1	0	168	70	3	21017	SLC1A3,VTI1A,DMPK	neuromuscular process	5.63962
1039	GO:BP	pigment cell differentiation	GO:0050931	1	0	36	70	1	21017	MITF	pigment cell differentiation	8.65921
1040	GO:BP	sensory perception of mechanical stimulus	GO:0050954	1	0	190	70	1	21017	SLC1A3	sensory perception of mechanical stimulus	1.59175
1041	GO:BP	detection of mechanical stimulus	GO:0050982	1	0	55	70	1	21017	TTN	detection of mechanical stimulus	5.60735
1042	GO:BP	regulation of nitric-oxide synthase activity	GO:0050999	1	0	23	70	1	21017	NOS1AP	regulation of nitric-oxide synthase activity	13.7846
1043	GO:BP	positive regulation of nitric-oxide synthase activity	GO:0051000	1	0	16	70	1	21017	NOS1AP	positive regulation of nitric-oxide synthase activity	20.2242
1044	GO:BP	actin filament severing	GO:0051014	1	0	17	70	1	21017	SVIL	actin filament severing	18.9592
1045	GO:BP	barbed-end actin filament capping	GO:0051016	1	0	25	70	1	21017	SVIL	barbed-end actin filament capping	12.6347
1046	GO:BP	neuromuscular process controlling balance	GO:0050885	1	0	55	70	1	21017	SLC1A3	neuromuscular process controlling balance	5.60735
1047	GO:BP	negative regulation of smooth muscle cell differentiation	GO:0051151	1	0	17	70	1	21017	NFATC3	negative regulation of smooth muscle cell differentiation	18.9592
1048	GO:BP	regulation of striated muscle cell differentiation	GO:0051153	1	0	85	70	2	21017	PROX1,DMPK	regulation of striated muscle cell differentiation	7.39334
1049	GO:BP	positive regulation of striated muscle cell differentiation	GO:0051155	1	0	43	70	1	21017	PROX1	positive regulation of striated muscle cell differentiation	7.2136
1050	GO:BP	negative regulation of sequestering of calcium ion	GO:0051283	1	0	128	70	1	21017	PLN	negative regulation of sequestering of calcium ion	2.3759
1051	GO:BP	centrosome duplication	GO:0051298	1	0	74	70	1	21017	PLK2	centrosome duplication	4.14413
1052	GO:BP	cell division	GO:0051301	1	0	656	70	2	21017	SVIL,UBE2I	cell division	0.912619
1053	GO:BP	regulation of cell division	GO:0051302	1	0	185	70	1	21017	SVIL	regulation of cell division	1.6354
1054	GO:BP	meiotic cell cycle	GO:0051321	1	0	294	70	1	21017	PDE3A	meiotic cell cycle	1.02162
1055	GO:BP	regulation of hydrolase activity	GO:0051336	1	0	401	70	2	21017	PDE3A,FERMT2	regulation of hydrolase activity	1.51467
1056	GO:BP	regulation of transferase activity	GO:0051338	1	0	539	70	6	21017	PROX1,TTN,CDKN1A,FERMT2,UBE2I,MAPT	regulation of transferase activity	3.59064
1057	GO:BP	regulation of lyase activity	GO:0051339	1	0	53	70	1	21017	RAF1	regulation of lyase activity	5.82358
1058	GO:BP	regulation of oxidoreductase activity	GO:0051341	1	0	64	70	1	21017	NOS1AP	regulation of oxidoreductase activity	4.80423
1059	GO:BP	positive regulation of hydrolase activity	GO:0051345	1	0	239	70	1	21017	FERMT2	positive regulation of hydrolase activity	1.26105
1060	GO:BP	positive regulation of transferase activity	GO:0051347	1	0	323	70	5	21017	PROX1,CDKN1A,FERMT2,UBE2I,MAPT	positive regulation of transferase activity	4.99008
1061	GO:BP	regulation of sequestering of calcium ion	GO:0051282	1	0	130	70	1	21017	PLN	regulation of sequestering of calcium ion	2.33884
1062	GO:BP	negative regulation of transferase activity	GO:0051348	1	0	180	70	2	21017	CDKN1A,MAPT	negative regulation of transferase activity	3.43176
1063	GO:BP	positive regulation of oxidoreductase activity	GO:0051353	1	0	41	70	1	21017	NOS1AP	positive regulation of oxidoreductase activity	7.575
1064	GO:BP	response to glucocorticoid	GO:0051384	1	0	135	70	2	21017	CDKN1A,FBXO32	response to glucocorticoid	4.60283
1065	GO:BP	response to mineralocorticoid	GO:0051385	1	0	40	70	1	21017	CDKN1A	response to mineralocorticoid	7.7696
1066	GO:BP	response to corticosterone	GO:0051412	1	0	17	70	1	21017	CDKN1A	response to corticosterone	18.9592
1067	GO:BP	regulation of meiotic cell cycle	GO:0051445	1	0	69	70	1	21017	PDE3A	regulation of meiotic cell cycle	4.44991
1068	GO:BP	regulation of cytosolic calcium ion concentration	GO:0051480	1	0	59	70	1	21017	PLN	regulation of cytosolic calcium ion concentration	5.21964
1069	GO:BP	regulation of stress fiber assembly	GO:0051492	1	0	91	70	2	21017	SYNPO2L,FERMT2	regulation of stress fiber assembly	6.89293
1070	GO:BP	negative regulation of cytoskeleton organization	GO:0051494	1	0	162	70	2	21017	SVIL,FHOD3	negative regulation of cytoskeleton organization	3.82114
1071	GO:BP	positive regulation of stress fiber assembly	GO:0051496	1	0	52	70	2	21017	SYNPO2L,FERMT2	positive regulation of stress fiber assembly	12.2924
1072	GO:BP	response to calcium ion	GO:0051592	1	0	147	70	1	21017	TTN	response to calcium ion	2.06482
1073	GO:BP	proteolysis involved in protein catabolic process	GO:0051603	1	0	732	70	5	21017	UBE2D2,ADAMTS7,UBE2I,NEDD4L,UBA6	proteolysis involved in protein catabolic process	2.13946
1074	GO:BP	positive regulation of lyase activity	GO:0051349	1	0	34	70	1	21017	RAF1	positive regulation of lyase activity	9.18489
1075	GO:BP	regulation of release of sequestered calcium ion into cytosol	GO:0051279	1	0	81	70	1	21017	PLN	regulation of release of sequestered calcium ion into cytosol	3.78025
1076	GO:BP	chromosome organization	GO:0051276	1	0	628	70	3	21017	TTN,MAPT,SMARCB1	chromosome organization	1.4559
1077	GO:BP	protein depolymerization	GO:0051261	1	0	118	70	2	21017	ACTN2,SVIL	protein depolymerization	5.28169
1078	GO:BP	glucose 6-phosphate metabolic process	GO:0051156	1	0	30	70	1	21017	TKT	glucose 6-phosphate metabolic process	10.4538
1079	GO:BP	xylulose 5-phosphate metabolic process	GO:0051167	1	0	6	70	1	21017	TKT	xylulose 5-phosphate metabolic process	60.7014
1080	GO:BP	nuclear export	GO:0051168	1	0	167	70	3	21017	XPO7,BAG3,UBE2I	nuclear export	5.67428
1081	GO:BP	nuclear transport	GO:0051169	1	0	331	70	4	21017	CDKN1A,XPO7,BAG3,UBE2I	nuclear transport	3.8217
1082	GO:BP	import into nucleus	GO:0051170	1	0	168	70	2	21017	CDKN1A,BAG3	import into nucleus	3.68196
1083	GO:BP	regulation of phosphorus metabolic process	GO:0051174	1	0	1072	70	6	21017	PROX1,TTN,RAF1,CDKN1A,FERMT2,MAPT	regulation of phosphorus metabolic process	1.74845
1084	GO:BP	localization	GO:0051179	1	0	5521	70	21	21017	RNF207,NOS1AP,OBSCN,ACTN2,TTN,RAF1,SLC6A6,GNRHR,SLC1A3,CDKN1A,PLN,XPO7,VTI1A,BAG3,PKP2,FERMT2,UBE2I,CREBBP,MAPT,NEDD4L,DMPK	localization	1.20366
1085	GO:BP	sequestering of calcium ion	GO:0051208	1	0	134	70	1	21017	PLN	sequestering of calcium ion	2.26806
1086	GO:BP	release of sequestered calcium ion into cytosol	GO:0051209	1	0	127	70	1	21017	PLN	release of sequestered calcium ion into cytosol	2.39487
1087	GO:BP	cartilage development	GO:0051216	1	0	214	70	2	21017	NFIA,ADAMTS7	cartilage development	2.87666
1088	GO:BP	positive regulation of protein transport	GO:0051222	1	0	256	70	2	21017	TTN,BAG3	positive regulation of protein transport	2.39613
1089	GO:BP	regulation of protein transport	GO:0051223	1	0	441	70	2	21017	TTN,BAG3	regulation of protein transport	1.37398
1090	GO:BP	establishment of localization	GO:0051234	1	0	4869	70	18	21017	RNF207,NOS1AP,ACTN2,TTN,RAF1,SLC6A6,GNRHR,SLC1A3,CDKN1A,PLN,XPO7,VTI1A,BAG3,PKP2,UBE2I,MAPT,NEDD4L,DMPK	establishment of localization	1.14857
1091	GO:BP	maintenance of location	GO:0051235	1	0	334	70	2	21017	PLN,PKP2	maintenance of location	1.82628
1092	GO:BP	positive regulation of multicellular organismal process	GO:0051240	1	0	1644	70	10	21017	PRDM16,PROX1,LPIN1,CDKN1A,TBX5,FERMT2,NFATC3,MAPT,PRKCA,SMARCB1	positive regulation of multicellular organismal process	1.96991
1093	GO:BP	negative regulation of multicellular organismal process	GO:0051241	1	0	1088	70	8	21017	SKI,PROX1,LPIN1,PLK2,MLIP,PLN,TBX5,ADAMTS7	negative regulation of multicellular organismal process	2.3736
1094	GO:BP	regulation of protein metabolic process	GO:0051246	1	0	1975	70	10	21017	NOS1AP,PROX1,TTN,RAF1,PLK2,CDKN1A,FERMT2,UBE2I,MAPT,NEDD4L	regulation of protein metabolic process	1.61001
1095	GO:BP	positive regulation of protein metabolic process	GO:0051247	1	0	1152	70	7	21017	NOS1AP,PROX1,RAF1,PLK2,CDKN1A,FERMT2,NEDD4L	positive regulation of protein metabolic process	1.92159
1096	GO:BP	negative regulation of protein metabolic process	GO:0051248	1	0	708	70	2	21017	CDKN1A,MAPT	negative regulation of protein metabolic process	0.843234
1097	GO:BP	regulation of lymphocyte activation	GO:0051249	1	0	497	70	2	21017	CDKN1A,SMARCB1	regulation of lymphocyte activation	1.21521
1098	GO:BP	positive regulation of lymphocyte activation	GO:0051251	1	0	324	70	2	21017	CDKN1A,SMARCB1	positive regulation of lymphocyte activation	1.88391
1099	GO:BP	negative regulation of RNA metabolic process	GO:0051253	1	0	1457	70	11	21017	SKI,PRDM16,PROX1,MITF,MLIP,FOXN3,UBE2I,CREBBP,NFATC3,BACH1,E2F6	negative regulation of RNA metabolic process	2.51437
1100	GO:BP	protein polymerization	GO:0051258	1	0	289	70	3	21017	SVIL,MAPT,FHOD3	protein polymerization	3.23468
1101	GO:BP	protein complex oligomerization	GO:0051259	1	0	266	70	1	21017	MAPT	protein complex oligomerization	1.13109
1102	GO:BP	protein homooligomerization	GO:0051260	1	0	199	70	1	21017	MAPT	protein homooligomerization	1.51874
1103	GO:BP	regulation of calcium-mediated signaling	GO:0050848	1	0	93	70	1	21017	MAPT	regulation of calcium-mediated signaling	3.28529
1104	GO:BP	protein maturation	GO:0051604	1	0	571	70	4	21017	BAG3,CREBBP,LMF1,DNAJC18	protein maturation	2.1784
1105	GO:BP	progesterone receptor signaling pathway	GO:0050847	1	0	12	70	1	21017	PGR	progesterone receptor signaling pathway	27.5837
1106	GO:BP	coagulation	GO:0050817	1	0	233	70	1	21017	PRKCA	coagulation	1.29404
1107	GO:BP	response to steroid hormone	GO:0048545	1	0	339	70	4	21017	CDKN1A,FBXO32,PGR,PDE3A	response to steroid hormone	3.72899
1108	GO:BP	embryonic organ morphogenesis	GO:0048562	1	0	305	70	2	21017	RNF207,PROX1	embryonic organ morphogenesis	2.00388
1109	GO:BP	digestive tract development	GO:0048565	1	0	134	70	1	21017	CDKN1A	digestive tract development	2.26806
1110	GO:BP	embryonic organ development	GO:0048568	1	0	463	70	2	21017	RNF207,PROX1	embryonic organ development	1.30701
1111	GO:BP	regulation of response to stimulus	GO:0048583	1	0	3958	70	20	21017	SKI,PRDM16,NOS1AP,PROX1,OBSCN,RAF1,MLF1,PLK2,MLIP,FBXO32,SYNPO2L,PDE3A,FERMT2,AKAP13,CREBBP,NFATC3,MAPT,PRKCA,DMPK,SMARCB1	regulation of response to stimulus	1.72768
1112	GO:BP	positive regulation of response to stimulus	GO:0048584	1	0	2293	70	11	21017	SKI,NOS1AP,PROX1,RAF1,PLK2,SYNPO2L,FERMT2,AKAP13,CREBBP,PRKCA,SMARCB1	positive regulation of response to stimulus	1.52494
1113	GO:BP	negative regulation of response to stimulus	GO:0048585	1	0	1663	70	6	21017	SKI,PRDM16,RAF1,PLK2,MLIP,PDE3A	negative regulation of response to stimulus	1.09139
1114	GO:BP	developmental cell growth	GO:0048588	1	0	234	70	3	21017	PDLIM5,MAPT,NEDD4L	developmental cell growth	4.01551
1115	GO:BP	eye morphogenesis	GO:0048592	1	0	169	70	3	21017	SKI,PROX1,PROM1	eye morphogenesis	5.60538
1116	GO:BP	camera-type eye morphogenesis	GO:0048593	1	0	134	70	3	21017	SKI,PROX1,PROM1	camera-type eye morphogenesis	7.11496
1117	GO:BP	embryonic camera-type eye morphogenesis	GO:0048596	1	0	26	70	1	21017	PROX1	embryonic camera-type eye morphogenesis	12.1287
1118	GO:BP	thymus development	GO:0048538	1	0	50	70	1	21017	RAF1	thymus development	6.18101
1119	GO:BP	embryonic morphogenesis	GO:0048598	1	0	617	70	5	21017	SKI,RNF207,PROX1,TBX5,CREBBP	embryonic morphogenesis	2.55593
1120	GO:BP	reproductive structure development	GO:0048608	1	0	313	70	1	21017	PGR	reproductive structure development	0.958519
1121	GO:BP	multicellular organismal reproductive process	GO:0048609	1	0	980	70	4	21017	MAST2,PLN,PGR,PDE3A	multicellular organismal reproductive process	1.24013
1122	GO:BP	regulation of developmental growth	GO:0048638	1	0	322	70	5	21017	PROX1,CDKN1A,TBX5,MAPT,NEDD4L	regulation of developmental growth	5.00607
1123	GO:BP	positive regulation of developmental growth	GO:0048639	1	0	165	70	4	21017	PROX1,TBX5,MAPT,NEDD4L	positive regulation of developmental growth	7.82458
1124	GO:BP	negative regulation of developmental growth	GO:0048640	1	0	108	70	2	21017	CDKN1A,TBX5	negative regulation of developmental growth	5.78274
1125	GO:BP	muscle organ morphogenesis	GO:0048644	1	0	77	70	3	21017	PROX1,TTN,PKP2	muscle organ morphogenesis	12.6299
1126	GO:BP	animal organ formation	GO:0048645	1	0	70	70	1	21017	TBX5	animal organ formation	4.38521
1127	GO:BP	smooth muscle cell proliferation	GO:0048659	1	0	144	70	1	21017	CDKN1A	smooth muscle cell proliferation	2.10844
1128	GO:BP	regulation of smooth muscle cell proliferation	GO:0048660	1	0	140	70	1	21017	CDKN1A	regulation of smooth muscle cell proliferation	2.16953
1129	GO:BP	negative regulation of smooth muscle cell proliferation	GO:0048662	1	0	50	70	1	21017	CDKN1A	negative regulation of smooth muscle cell proliferation	6.18101
1130	GO:BP	neuron fate commitment	GO:0048663	1	0	73	70	2	21017	NFIA,PROX1	neuron fate commitment	8.64789
1131	GO:BP	oocyte development	GO:0048599	1	0	63	70	1	21017	PDE3A	oocyte development	4.88195
1132	GO:BP	neuron fate determination	GO:0048664	1	0	10	70	1	21017	PROX1	neuron fate determination	33.7166
1133	GO:BP	hematopoietic or lymphoid organ development	GO:0048534	1	0	100	70	1	21017	RAF1	hematopoietic or lymphoid organ development	3.05197
1134	GO:BP	spermatid differentiation	GO:0048515	1	0	222	70	2	21017	MAST2,PLN	spermatid differentiation	2.77099
1135	GO:BP	insulin-like growth factor receptor signaling pathway	GO:0048009	1	0	51	70	1	21017	RAF1	insulin-like growth factor receptor signaling pathway	6.0571
1136	GO:BP	neurotrophin TRK receptor signaling pathway	GO:0048011	1	0	26	70	1	21017	RAF1	neurotrophin TRK receptor signaling pathway	12.1287
1137	GO:BP	focal adhesion assembly	GO:0048041	1	0	85	70	2	21017	ACTN2,FERMT2	focal adhesion assembly	7.39334
1138	GO:BP	embryonic eye morphogenesis	GO:0048048	1	0	35	70	1	21017	PROX1	embryonic eye morphogenesis	8.91432
1139	GO:BP	developmental pigmentation	GO:0048066	1	0	49	70	1	21017	MITF	developmental pigmentation	6.31008
1140	GO:BP	astrocyte activation	GO:0048143	1	0	24	70	1	21017	MAPT	astrocyte activation	13.1846
1141	GO:BP	fibroblast proliferation	GO:0048144	1	0	111	70	2	21017	SKI,CDKN1A	fibroblast proliferation	5.62277
1142	GO:BP	regulation of fibroblast proliferation	GO:0048145	1	0	91	70	2	21017	SKI,CDKN1A	regulation of fibroblast proliferation	6.89293
1143	GO:BP	positive regulation of fibroblast proliferation	GO:0048146	1	0	55	70	1	21017	CDKN1A	positive regulation of fibroblast proliferation	5.60735
1144	GO:BP	negative regulation of fibroblast proliferation	GO:0048147	1	0	35	70	1	21017	SKI	negative regulation of fibroblast proliferation	8.91432
1145	GO:BP	regulation of synaptic plasticity	GO:0048167	1	0	216	70	2	21017	PLK2,MAPT	regulation of synaptic plasticity	2.84951
1146	GO:BP	negative regulation of viral process	GO:0048525	1	0	95	70	1	21017	PROX1	negative regulation of viral process	3.21508
1147	GO:BP	Golgi vesicle transport	GO:0048193	1	0	301	70	1	21017	VTI1A	Golgi vesicle transport	0.99744
1148	GO:BP	vesicle fusion with Golgi apparatus	GO:0048280	1	0	9	70	1	21017	VTI1A	vesicle fusion with Golgi apparatus	37.933
1149	GO:BP	organelle fusion	GO:0048284	1	0	158	70	1	21017	VTI1A	organelle fusion	1.91914
1150	GO:BP	organelle fission	GO:0048285	1	0	498	70	5	21017	NFIA,TTN,PDE3A,UBE2I,MAPT	organelle fission	3.19145
1151	GO:BP	lung alveolus development	GO:0048286	1	0	54	70	1	21017	PGR	lung alveolus development	5.71343
1152	GO:BP	mitochondrion distribution	GO:0048311	1	0	20	70	1	21017	MAPT	mitochondrion distribution	15.9634
1153	GO:BP	intracellular distribution of mitochondria	GO:0048312	1	0	7	70	1	21017	MAPT	intracellular distribution of mitochondria	50.5821
1154	GO:BP	cell maturation	GO:0048469	1	0	208	70	3	21017	CDKN1A,PGR,PDE3A	cell maturation	4.53047
1155	GO:BP	oogenesis	GO:0048477	1	0	112	70	1	21017	PDE3A	oogenesis	2.72046
1156	GO:BP	maintenance of animal organ identity	GO:0048496	1	0	5	70	1	21017	PKP2	maintenance of animal organ identity	75.8804
1157	GO:BP	rhythmic process	GO:0048511	1	0	300	70	4	21017	PROX1,PGR,CREBBP,HLF	rhythmic process	4.2283
1158	GO:BP	blood vessel morphogenesis	GO:0048514	1	0	628	70	5	21017	PROX1,PLK2,TBX5,NFATC3,PRKCA	blood vessel morphogenesis	2.50945
1159	GO:BP	male gamete generation	GO:0048232	1	0	654	70	2	21017	MAST2,PLN	male gamete generation	0.915509
1160	GO:BP	neuron fate specification	GO:0048665	1	0	35	70	1	21017	NFIA	neuron fate specification	8.91432
1161	GO:BP	neuron development	GO:0048666	1	0	1170	70	7	21017	NEXN,STRN,PDLIM5,SLC1A3,MAPT,NEDD4L,UBA6	neuron development	1.89013
1162	GO:BP	cell morphogenesis involved in neuron differentiation	GO:0048667	1	0	595	70	5	21017	NEXN,PDLIM5,SLC1A3,MAPT,NEDD4L	cell morphogenesis involved in neuron differentiation	2.65411
1163	GO:BP	negative regulation of epithelial cell proliferation	GO:0050680	1	0	136	70	1	21017	MTSS1	negative regulation of epithelial cell proliferation	2.23425
1164	GO:BP	regulation of protein secretion	GO:0050708	1	0	266	70	1	21017	TTN	regulation of protein secretion	1.13109
1165	GO:BP	positive regulation of protein secretion	GO:0050714	1	0	148	70	1	21017	TTN	positive regulation of protein secretion	2.05068
1166	GO:BP	regulation of inflammatory response	GO:0050727	1	0	381	70	1	21017	PLK2	regulation of inflammatory response	0.784401
1167	GO:BP	negative regulation of inflammatory response	GO:0050728	1	0	163	70	1	21017	PLK2	negative regulation of inflammatory response	1.85946
1168	GO:BP	regulation of neurogenesis	GO:0050767	1	0	388	70	3	21017	SKI,PROX1,MAPT	regulation of neurogenesis	2.39139
1169	GO:BP	negative regulation of neurogenesis	GO:0050768	1	0	147	70	2	21017	SKI,PROX1	negative regulation of neurogenesis	4.21947
1170	GO:BP	positive regulation of neurogenesis	GO:0050769	1	0	244	70	1	21017	MAPT	positive regulation of neurogenesis	1.23481
1171	GO:BP	regulation of axonogenesis	GO:0050770	1	0	158	70	1	21017	MAPT	regulation of axonogenesis	1.91914
1172	GO:BP	positive regulation of axonogenesis	GO:0050772	1	0	80	70	1	21017	MAPT	positive regulation of axonogenesis	3.82829
1173	GO:BP	regulation of dendrite development	GO:0050773	1	0	99	70	1	21017	NEDD4L	regulation of dendrite development	3.08326
1174	GO:BP	positive regulation of epithelial cell proliferation	GO:0050679	1	0	205	70	2	21017	PROX1,PRKCA	positive regulation of epithelial cell proliferation	3.00551
1175	GO:BP	regulation of immune response	GO:0050776	1	0	897	70	2	21017	PLK2,CREBBP	regulation of immune response	0.658955
1176	GO:BP	positive regulation of immune response	GO:0050778	1	0	732	70	1	21017	CREBBP	positive regulation of immune response	0.400801
1177	GO:BP	regulation of catalytic activity	GO:0050790	1	0	1015	70	10	21017	NOS1AP,PROX1,TTN,RAF1,CDKN1A,PLN,PDE3A,FERMT2,UBE2I,MAPT	regulation of catalytic activity	3.30713
1178	GO:BP	regulation of viral process	GO:0050792	1	0	169	70	1	21017	PROX1	regulation of viral process	1.79253
1179	GO:BP	monoatomic ion homeostasis	GO:0050801	1	0	608	70	3	21017	SLC1A3,PLN,DMPK	monoatomic ion homeostasis	1.50551
1180	GO:BP	regulation of synapse structure or activity	GO:0050803	1	0	249	70	2	21017	PDLIM5,DMPK	regulation of synapse structure or activity	2.46487
1181	GO:BP	modulation of chemical synaptic transmission	GO:0050804	1	0	490	70	5	21017	SLC6A6,SLC1A3,PLK2,MAPT,DMPK	modulation of chemical synaptic transmission	3.24536
1182	GO:BP	negative regulation of synaptic transmission	GO:0050805	1	0	55	70	2	21017	PLK2,MAPT	negative regulation of synaptic transmission	11.5949
1183	GO:BP	positive regulation of synaptic transmission	GO:0050806	1	0	177	70	2	21017	SLC1A3,PLK2	positive regulation of synaptic transmission	3.49109
1184	GO:BP	regulation of synapse organization	GO:0050807	1	0	242	70	2	21017	PDLIM5,DMPK	regulation of synapse organization	2.53762
1185	GO:BP	synapse organization	GO:0050808	1	0	485	70	5	21017	NFIA,NOS1AP,PDLIM5,MAPT,DMPK	synapse organization	3.27997
1186	GO:BP	regulation of steroid biosynthetic process	GO:0050810	1	0	74	70	1	21017	PROX1	regulation of steroid biosynthetic process	4.14413
1187	GO:BP	negative regulation of immune response	GO:0050777	1	0	192	70	1	21017	PLK2	negative regulation of immune response	1.57493
1188	GO:BP	regulation of epithelial cell proliferation	GO:0050678	1	0	363	70	4	21017	PROX1,MTSS1,PGR,PRKCA	regulation of epithelial cell proliferation	3.47565
1189	GO:BP	epithelial cell proliferation	GO:0050673	1	0	442	70	6	21017	PROX1,RAF1,CDKN1A,MTSS1,PGR,PRKCA	epithelial cell proliferation	4.41034
1190	GO:BP	positive regulation of lymphocyte proliferation	GO:0050671	1	0	143	70	1	21017	CDKN1A	positive regulation of lymphocyte proliferation	2.12339
1191	GO:BP	axon extension	GO:0048675	1	0	124	70	1	21017	MAPT	axon extension	2.45363
1192	GO:BP	generation of neurons	GO:0048699	1	0	1517	70	10	21017	NFIA,NEXN,PROX1,STRN,PROM1,PDLIM5,SLC1A3,MAPT,NEDD4L,UBA6	generation of neurons	2.14997
1193	GO:BP	skeletal system morphogenesis	GO:0048705	1	0	234	70	2	21017	SKI,FOXN3	skeletal system morphogenesis	2.62614
1194	GO:BP	astrocyte differentiation	GO:0048708	1	0	86	70	1	21017	MAPT	astrocyte differentiation	3.55703
1195	GO:BP	gland development	GO:0048732	1	0	454	70	4	21017	PROX1,RAF1,PGR,SMARCB1	gland development	2.76054
1196	GO:BP	skeletal muscle fiber development	GO:0048741	1	0	41	70	1	21017	SKI	skeletal muscle fiber development	7.575
1197	GO:BP	smooth muscle tissue development	GO:0048745	1	0	25	70	1	21017	PROX1	smooth muscle tissue development	12.6347
[truncated: 13,577 more rows]

## Sheet: ST9 Partitioned heritability of
Annotation (SNP set; source)	Target GWAS (trait evaluated)	Prop._SNPs	Prop._h2	Prop._h2_std_error	Enrichment	Enrichment_std_error	Enrichment_p	Coefficient	Coefficient_std_error	Coefficient_z-score
[truncated: 7 more rows]

[truncated: 27 more sheets: ST10 Pathway enrichment of nove, ST11 PheWAS for genes from nove, ST12 Validation of top SNPs fro, ST13 Druggability of all priori, ST14 PGS performance metrics ac, ST15 Phenotype definitions for , ST16 PGS replication analyses, ST17 PheWAS for CASQ2, ST18 Validation of top SNP from, ST19 rg DCM, HCM & shared-effec, ST20 Pairwise rg with other car, ST21 rg across cardiomyopathy G, ST22 Trait PGS in DCM and HCM c, ST23 Expression of prioritized , ST24 Summary of fine-mapping an, ST25 SuSiE LD intervals for DCM, ST26 Gene prioritization scores, ST27 SuSiE LD intervals for HCM, ST28 Gene prioritization scores, ST29 SuSiE LD intervals for DCM …]
